# Supplementary material
Source: PubMed Central journal article supplement (PMC4831668)
Supplement: cs5b02742_si_001.pdf [file cs5b02742_si_001.pdf]

## Supporting Information

# Copper-Catalyzed Borylative Aromatization of *p*-Quinone Methides: Enantioselective Synthesis of Dibenzyllic Boronates.

Carlos Jarava-Barrera, Alejandro Parra, Aurora López, Fabio Cruz-Acosta, Daniel Collado-Sanz, Diego J. Cárdenas, and Mariola Tortosa\*

*Departamento de Química Orgánica (Módulo-01), Facultad de Ciencias, Universidad Autónoma de Madrid. 28049-Madrid, Spain*

Corresponding Author  
mariola.tortosa@uam.es

### Table of Contents

|                                                                                                   |      |
|---------------------------------------------------------------------------------------------------|------|
| 1. General Experimental Details                                                                   | S2   |
| 2. Optimization Details                                                                           | S3   |
| 3. Synthesis of Starting Materials                                                                | S5   |
| 3.1. General procedure for the synthesis of 2,6-di- <i>tert</i> -butyl <i>p</i> -quinone methides | S5   |
| 3.2. Synthesis of 2,6-dimethyl <i>p</i> -quinone methides                                         | S7   |
| 3.3. Synthesis of 2,6-diisopropyl <i>p</i> -quinone methide <b>1n</b>                             | S15  |
| 4. General procedure for the synthesis of chiral dibenzyllic boronates <b>2a-2p</b>               | S18  |
| 5. Functionalization of the C-B bond                                                              | S25  |
| 5.1. General procedure for the synthesis of chiral benzylic alcohols <b>3a-3p</b>                 | S25  |
| 5.2. Synthesis of the diarylfurylmethane <b>5</b>                                                 | S29  |
| 5.3. Procedure for the synthesis of 1,2-diarylethane <b>7</b>                                     | S31  |
| 6. NMR spectra                                                                                    | S34  |
| 7. SFC Chromatograms                                                                              | S88  |
| 8. X-Ray data                                                                                     | S105 |
| 9. DFT calculations.                                                                              | S111 |

## **1. General Experimental Details**

Tetrahydrofuran, toluene, acetonitrile and dichloromethane were purified by passing through a Pure Solv™ column drying system from Innovative Technology, Inc. Additionally, argon was bubbled through THF and methanol before used. Dry-DMF was acquired from commercial sources. Unless indicated otherwise, all reactions were conducted under an argon atmosphere using flame-dried glassware with standard vacuum-line techniques. NMR spectra were acquired on a Bruker 300 spectrometer, running at 300, and 75 MHz for <sup>1</sup>H and <sup>13</sup>C, respectively. Chemical shifts (δ) are reported in ppm relative to residual solvent signals (CDCl<sub>3</sub>, 7.26 ppm for <sup>1</sup>H-NMR and 77.0 ppm for <sup>13</sup>C-NMR respectively). <sup>13</sup>C-NMR spectra were acquired on a broad band decoupled mode. The following abbreviations are used to describe peak patterns when appropriate: s (singlet), d (doublet), t (triplet), q (quartet), quint (quintet), sept (septuplet), m (multiplet), bs (broad singlet). Analytical thin layer chromatography (TLC) was performed using pre-coated aluminium-backed plates (Merck Kieselgel 60 F254) and visualized by ultraviolet irradiation or phosphomolybdic acid dip, vainilline dip or potassium permanganate dip. Purification of reaction mixtures were carried out by flash chromatography (FC) using silica gel Merck-60 or Florisil® 100-200 mesh from Aldrich. Optical rotations were measured on a Perkin-Elmer 241 polarimeter. The enantiomeric ratio (er) of the products was determined by stationary phase SFC using chiral columns or by stationary phase HPLC using chiral columns. Mass Spectrometry (MS) and High Resolution Mass Spectrometry (HRMS) were registered in a spectrometer GCT Agilent Technologies 6890N using Electronic Impact (E.I.) techniques at 70 eV, electrospray (ESI+) and Fast Atom Bombardment (FAB+). Melting points were determined in a Gallenkamp apparatus in open capillary tubes. All ligands, [Cu(CH<sub>3</sub>CN)<sub>4</sub>]PF<sub>6</sub>, NaO<sup>t</sup>Bu (2.0 M solution in THF), were acquired from commercial sources and were used without further purification. Bis(pinacolato)diboron was recrystallized in *n*-pentane before used.

## 2.Optimization details

**Table S1. Ligand Effect on the 1,6 Boron conjugate addition to *p*-quinone methide **1a**.<sup>a</sup>**

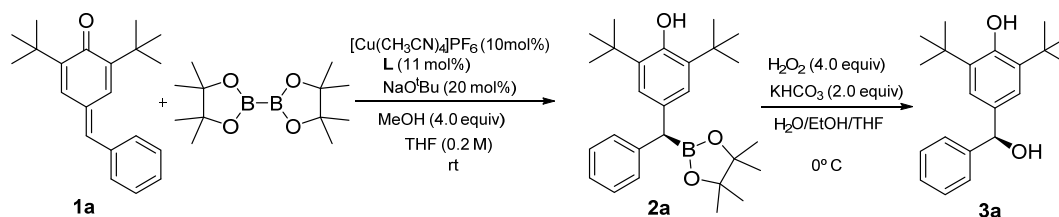

| Entry          | Ligand    | Solvent    | Yield <sup>b</sup> (%) | <i>Er</i> of <b>3a</b> |
|----------------|-----------|------------|------------------------|------------------------|
| 1              | none      | THF        | 35                     | -                      |
| 2              | L1        | THF        | 47                     | 54.5:45.5              |
| 3              | L2        | THF        | 52                     | 65:35                  |
| 4              | L3        | THF        | 76                     | 77:23                  |
| 5              | L4        | THF        | 68                     | 83:17                  |
| 6              | L5        | THF        | 41                     | 66.5:33.5              |
| 7              | <b>L6</b> | <b>THF</b> | <b>95</b>              | <b>96:4</b>            |
| 8 <sup>c</sup> | L6        | THF        | 79                     | 94:6                   |
| 9 <sup>d</sup> | L6        | THF        | 54                     | 74:26                  |
| 10             | L6        | toluene    | 83                     | 97:3                   |
| 11             | L7        | THF        | 64                     | 57:43                  |
| 12             | L8        | THF        | 32                     | 49:51                  |
| 13             | L9        | THF        | 70                     | 61:39                  |
| 14             | L10       | THF        | 59                     | 63:37                  |
| 15             | L11       | THF        | 36                     | 56:44                  |
| 16             | L12       | THF        | 41                     | 61:39                  |
| 17             | L13       | THF        | 62                     | 49:51                  |
| 18             | L14       | THF        | 55                     | 61:39                  |
| 19             | L15       | THF        | 27                     | 55:45                  |
| 20             | L16       | THF        | 69                     | 55:45                  |
| 21             | L17       | THF        | 50                     | 68:32                  |
| 22             | L18       | THF        | 70                     | 50:50                  |
| 23             | L19       | THF        | 9                      | 74:26                  |

**a:** Reaction conditions: **1a** (0.2 mmol), B<sub>2</sub>pin<sub>2</sub> (0.30 mmol), NaO<sup>*t*</sup>Bu (20 mol%), [Cu(CH<sub>3</sub>CN)<sub>4</sub>]PF<sub>6</sub> (10 mol%), **L** (11 mol%), MeOH (0.8 mmol), THF (0.2 M). **b:** Yield of isolated **2a**. **c:** [Cu(CH<sub>3</sub>CN)<sub>4</sub>]PF<sub>6</sub> (5 mol%), **L6** (5.5 mol%). **d:** The reaction was carried out in the absence of MeOH.

When **1a** was treated in THF with Cu(CH<sub>3</sub>CN)<sub>4</sub>PF<sub>6</sub> (10 mol%), B<sub>2</sub>pin<sub>2</sub> (1.5 equiv.), NaO<sup>*t*</sup>Bu (0.2 equiv.) and MeOH (4 equiv.) in the absence of ligand, we observed the formation of product **2a** with moderate yield (Table S1, entry 1). This background reaction showed the feasibility of the transformation but also revealed a serious handicap for the development of an asymmetric version. We soon realized that the yields and stereoselectivities were highly dependent on the ligand. Commercially available (*R*)-DM-Segphos (**L6**) was superior to other chiral ligands affording the desired dibenzylic boronate **2a** in good yield and high enantiomeric ratio at room temperature (Table S1, entry 7, er = 96:4). The reaction can be carried out with 5 mol% of copper salt and 5.5 mol% of chiral phosphine (Table S1, entry 8) without affecting the enantioselectivity, although the yield observed under these conditions was slightly lower.

Interestingly, in the absence of MeOH we observed product formation but moderate enantiomeric ratio (Table S1, entry 9).

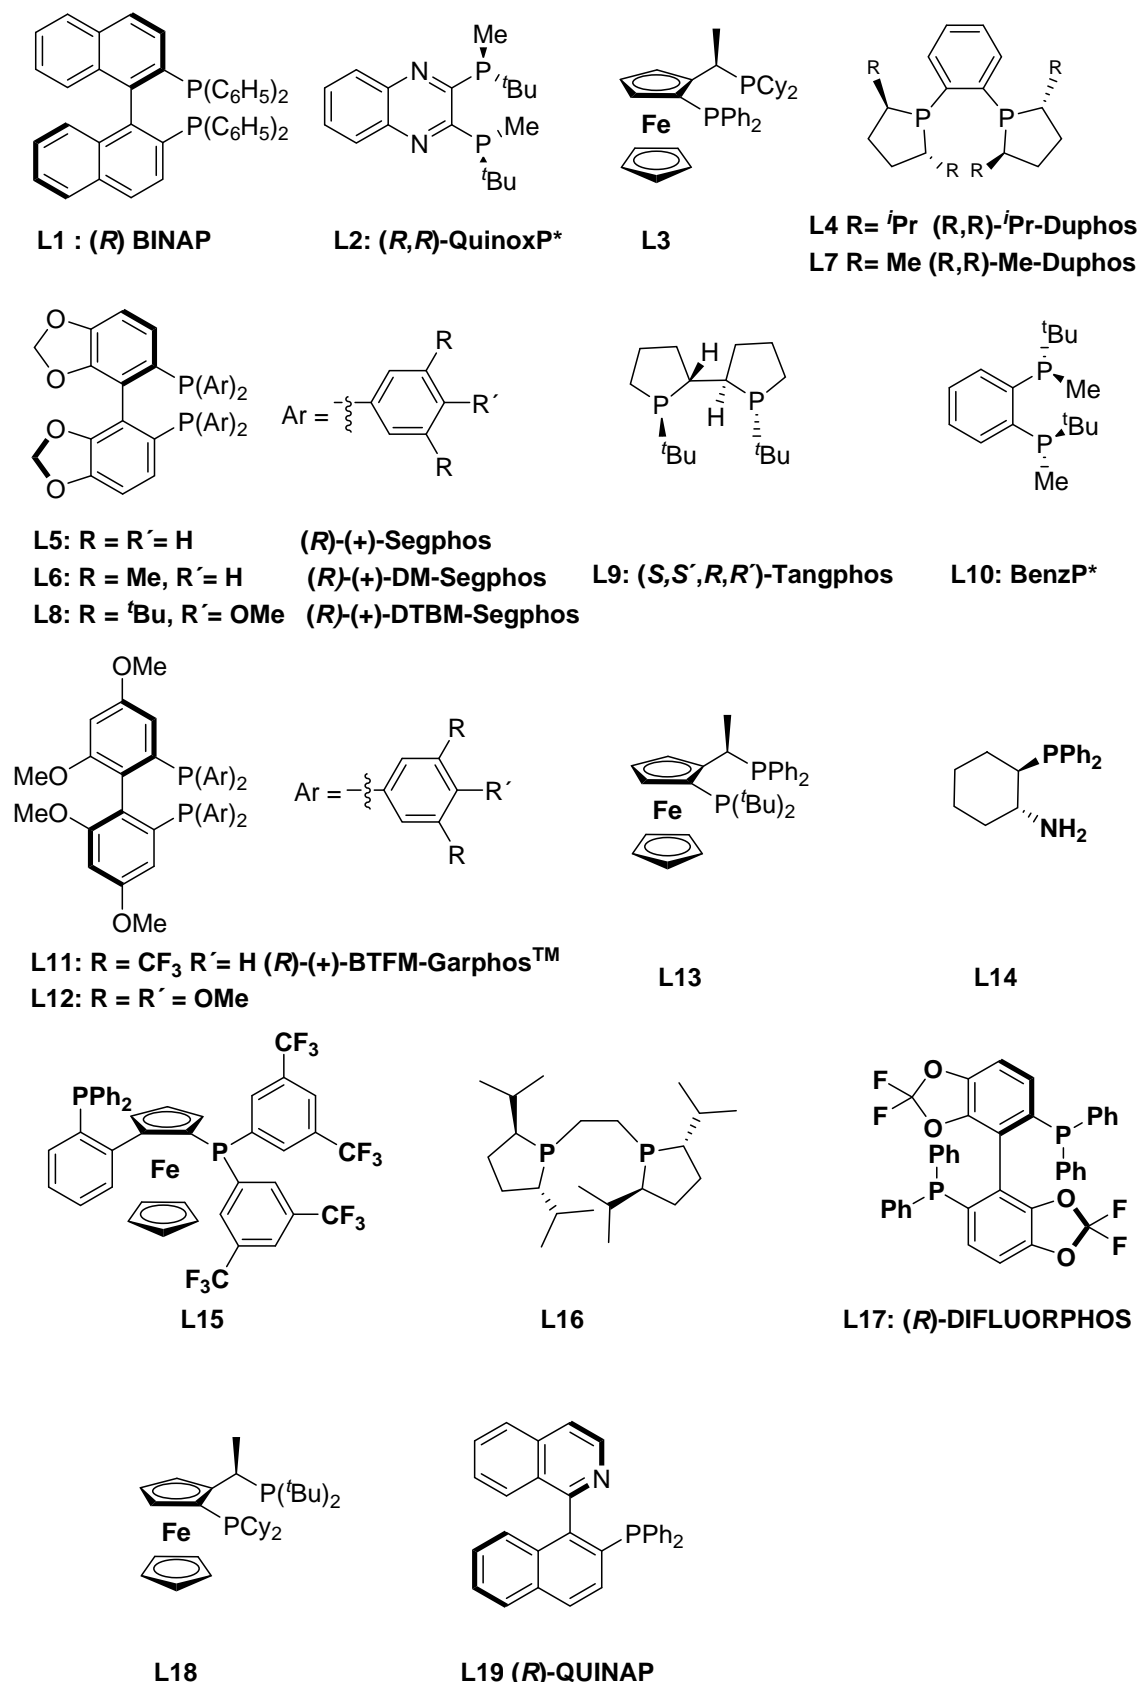

Figure S1: Ligands used for optimization.

### 3. Synthesis of Starting Materials

#### 3.1. General procedure for the synthesis of 2,6-di-*tert*-butyl *p*-quinone methides<sup>1</sup>

|                       |                                            |           |
|-----------------------|--------------------------------------------|-----------|
| $R^1 = R^2 = 'Bu$     | $R^3 = C_6H_5$                             | <b>1a</b> |
| $R^1 = R^2 = 'Bu$     | $R^3 = 2\text{-naphthyl}$                  | <b>1b</b> |
| $R^1 = R^2 = 'Bu$     | $R^3 = p\text{-OMe-C}_6\text{H}_4$         | <b>1c</b> |
| $R^1 = R^2 = 'Bu$     | $R^3 = p\text{-Me-C}_6\text{H}_4$          | <b>1d</b> |
| $R^1 = R^2 = 'Bu$     | $R^3 = m\text{-CF}_3\text{-C}_6\text{H}_4$ | <b>1e</b> |
| $R^1 = R^2 = 'Bu$     | $R^3 = p\text{-Br-C}_6\text{H}_4$          | <b>1f</b> |
| $R^1 = R^2 = 'Bu$     | $R^3 = o\text{-Br-C}_6\text{H}_4$          | <b>1g</b> |
| $R^1 = Me, R^2 = 'Bu$ | $R^3 = C_6H_5$                             | <b>1o</b> |
| $R^1 = Me, R^2 = 'Bu$ | $R^3 = p\text{-Br-C}_6\text{H}_4$          | <b>1p</b> |

In a Dean–Stark apparatus, a solution of 2,6-di-*tert*-butylphenol (or 2-(*tert*-butyl)-6-methylphenol) and the corresponding benzaldehyde in toluene was heated at 140 °C. Piperidine was added within 1 h and heating was continued for 12 h. After cooling to 115 °C, acetic anhydride was added and stirring was continued for 15 min. Then the reaction mixture was poured on ice-water and extracted with CH<sub>2</sub>Cl<sub>2</sub> (x3). The combined organic phases were dried over Mg<sub>2</sub>SO<sub>4</sub>, and the solvent was removed under reduced pressure. The crude products were purified by column chromatography (cyclohexane) and recrystallized from *n*-hexane.

Compounds **1a**<sup>2</sup>, **1c**<sup>2</sup>, **1d**<sup>3</sup>, **1f**<sup>2</sup>, **1g**<sup>2</sup>, and **1o**<sup>2</sup> were synthesized using this method and obtained as reported previously in the literature.

<sup>1</sup> Chu, W.-D.; Zhang, L.-F; Bao, X.; Zhao, X.-Y.; Zeng, C.; Du, J.-Y.; Zhang, G.-B.; Wang, F.Z.; Ma, Z.-Y.; Fan, C.-A. *Angew. Chem. Int. Ed.* **2013**, *52*, 9229.

<sup>2</sup> Koutek; B; Pavličková, L.; Souček, M. *Synthetic Commun.*, **1976**, *6*, 305.

<sup>3</sup> Roos, E.; Hugl, E. *DE 2734239 A 19770729*, **1979**.

### 2,6-di-*tert*-Butyl-4-(naphthalen-2-ylmethylene)cyclohexa-2,5-dienone (**1b**)

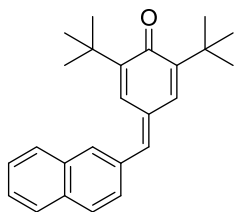

From 2,6-di-*tert*-butylphenol (5.0 g, 24.3 mmol, 1.0 equiv) and 2-naphthaldehyde (3.8 g, 24.3 mmol, 1.0 equiv), following the general procedure described above, compound **1b** was obtained in 65% yield, as a yellow solid, after purification by column chromatography (cyclohexane).  $R_f = 0.24$  (hexanes).

$^1\text{H-NMR}$  (300 MHz,  $\text{CDCl}_3$ ):  $\delta$  7.97-7.83 (m, 4H), 7.65 (d,  $J = 2.4$  Hz, 1H), 7.62-7.50 (m, 3H), 7.34 (s, 1H), 7.08 (d,  $J = 2.4$  Hz, 1H), 1.36 (s, 9H), 1.32 (s, 9H).  $^{13}\text{C-NMR}$  (75 MHz,  $\text{CDCl}_3$ ):  $\delta$  185.2, 148.2, 146.6, 141.1, 133.8, 132.2, 131.9, 130.9, 129.3, 127.2, 127.1, 126.6, 126.4, 126.0, 125.9, 125.5, 34.2, 33.7, 28.3, 28.2. **HRMS** ( $\text{EI}^+$ ) calculated for  $\text{C}_{25}\text{H}_{28}\text{O}$  [ $\text{M}^+$ ]: 344.2140, found: 344.2133. **mp** = 112-114 °C.

### 2,6-di-*tert*-Butyl-4-[3-(trifluoromethyl)benzylidene]cyclohexa-2,5-dien-1-one (**1e**)

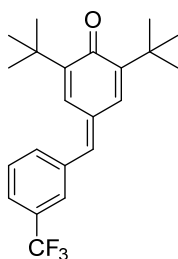

From 2,6-di-*tert*-butylphenol (5.0 g, 24.3 mmol, 1.0 equiv) and 3-(trifluoromethyl)benzaldehyde (4.2 g, 24.3 mmol, 1.0 equiv), following the general procedure described above, compound **1e** was obtained in 70% yield, as an orange solid, after purification by column chromatography (cyclohexane).  $R_f = 0.33$  (hexanes).

$^1\text{H-NMR}$  (300 MHz,  $\text{CDCl}_3$ )  $\delta$  7.71 (s, 1H), 7.67-7.54 (m, 3H), 7.42 (s, 1H), 7.17 (s, 1H), 7.02 (s, 1H), 1.31 (s, 9H), 1.30 (s, 9H).  $^{13}\text{C-NMR}$  (75 MHz,  $\text{CDCl}_3$ )  $\delta$  186.6, 150.3, 148.7, 139.8, 136.8, 134.7, 133.4, 133.3, 133.2, 131.5 (q,  $J_{\text{C-F}} = 32.0$  Hz), 129.4, 127.2, 127.1 (q,  $J_{\text{C-F}} = 3.8$  Hz), 125.5 (q,  $J_{\text{C-F}} = 3.8$  Hz), 124.0 (q,  $J_{\text{C-F}} = 270.75$  Hz), 35.7, 35.2, 29.6, 29.5.  $^{19}\text{F-NMR}$  (282 MHz,  $\text{CDCl}_3$ )  $\delta$  -62.9 (s). **HRMS** ( $\text{EI}^+$ ) calculated for  $\text{C}_{22}\text{H}_{25}\text{OF}_3$  [ $\text{M}^+$ ]: 362.1858, found: 362.1866. **mp** = 54-56 °C.

### 4-(4-Bromobenzylidene)-2-(*tert*-butyl)-6-methylcyclohexa-2,5-dien-1-one (**1p**)

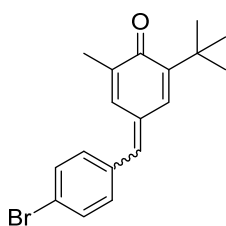

From 2-(*tert*-butyl)-6-methylphenol (4.0 g, 24.3 mmol, 1.0 equiv) and 4-bromobenzaldehyde (4.2 g, 24.3 mmol, 1.0 equiv), following the general procedure described above, compound **1p** was obtained in 32% yield after purification by column chromatography (cyclohexane) as a 1.7:1 mixture of A:B isomers and as a yellow solid (recrystallization of the product gave a 1.1:1 mixture of A:B isomers).  $R_f = 0.12$  (hexanes).

$^1\text{H-NMR}$  (300 MHz,  $\text{CDCl}_3$ ):  $\delta$  7.55 (d,  $J = 8.5$  Hz, 2H, isomer A), 7.54 (d,  $J = 8.5$  Hz, 2H, isomer B), 7.48 (d,  $J = 2.4$  Hz, 1H, isomer A), 7.38 (bs, 1H, isomer B), 7.29 (d,  $J = 8.5$  Hz, 2H, isomers A and B), 7.07 (s, 1H, isomer B), 7.03 (s, 1H, isomer A), 7.02 (d,  $J = 2.6$  Hz, 1H, isomer B), 6.97 (bs, 1H, isomer A), 2.01 (s, 3H, isomers A and B), 1.31 (s, 9H, isomer B), 1.28 (s, 9H, isomer A).  $^{13}\text{C-NMR}$  (75 MHz,  $\text{CDCl}_3$ ):  $\delta$  186.7 (isomer A), 186.6 (isomer B), 148.3 (isomer B), 146.7 (isomer A), 140.9 (isomer A), 140.6 (isomer B), 139.5 (isomer A), 137.6 (isomer B), 137.0 (isomer B), 136.5 (isomer A), 134.6 (isomer A), 134.5 (isomer B), 132.3 (isomer A), 132.2 (isomer B), 132.0 (both), 131.8 (isomer B), 131.7 (isomer A), 129.5 (isomer A), 128.5 (isomer B), 123.6 (isomer B), 123.5 (isomer A), 35.2 (isomer B), 34.8 (isomer A), 29.3 (isomer B), 29.2 (isomer A), 17.1 (isomer A), 16.4 (isomer B). **HRMS** ( $\text{EI}^+$ ) calculated for  $\text{C}_{18}\text{H}_{19}\text{OBr}$  [ $\text{M}^+$ ]: 330.0619, found: 330.0616. **mp** = 98-100 °C.

### 3.2. Synthesis of 2,6-dimethyl *p*-quinone methides

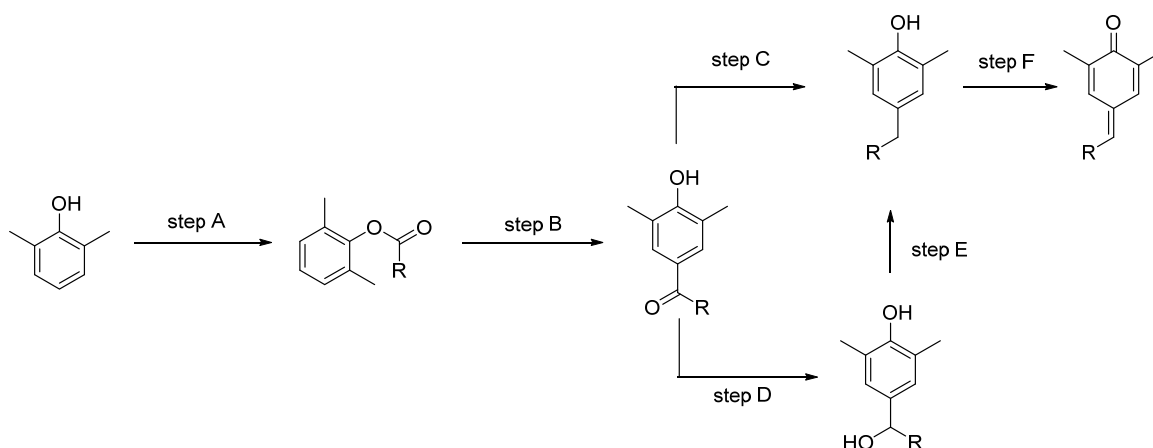

#### 3.2.1. General procedure for the synthesis of 2,4-dimethylbenzoates, step A<sup>4</sup>

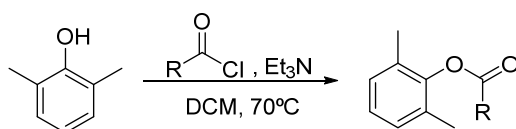

R = 2-naphthyl      **SI-1**

R = *p*-Br-C<sub>6</sub>H<sub>4</sub>      **SI-2**

R = *o*-Me-C<sub>6</sub>H<sub>4</sub>      **SI-3**

A round bottom flask was charged with 2,6-dimethylphenol (1.0 equiv), the corresponding acyl chloride (1.0 equiv) and triethylamine (1.4 equiv) in DCM (2.0 mL/1.0 mmol phenol). Then, the reaction mixture was stirred at 60 °C until starting material disappearance was observed by TLC and allowed to cool at room temperature. Then the reaction mixture was washed with water (x3) and the combined organic layers were dried over Na<sub>2</sub>SO<sub>4</sub>, filtered and the solvent was removed under reduced pressure. The product was used in the next step without further purification.

<sup>4</sup> Pews, R. *US 7141684*, 2006.

### Naphthalen-2-yl 2,6-dimethylbenzoate (SI-1)

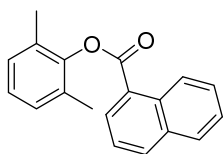

This compound was synthesized using this method and obtained as previously described in the literature.<sup>5</sup>

### 2,6-Dimethylphenyl 4-bromobenzoate (SI-2)

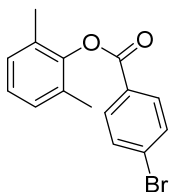

From 2,6-dimethylphenol (2.5 g, 20.5 mmol, 1.0 equiv) and *p*-bromobenzoyl chloride (4.5 g, 20.5 mmol, 1.0 equiv), following the general procedure described above, compound **SI-2** was obtained in 93% yield as a yellow oil.  $R_f = 0.72$  (33% hexanes/ethyl acetate).

$^1\text{H-NMR}$  (300 MHz,  $\text{CDCl}_3$ ):  $\delta$  8.29 (d,  $J = 8.2$  Hz, 2H), 7.78 (d,  $J = 8.2$  Hz, 2H), 7.28 (s, 3H), 2.40 (s, 6H).  $^{13}\text{C-NMR}$  (75 MHz,  $\text{CDCl}_3$ ):  $\delta$  163.8, 148.5, 132.2, 131.8, 130.4, 129.0, 128.9, 128.4, 126.3, 16.6. **HRMS** ( $\text{EI}^+$ ) calculated for  $\text{C}_{15}\text{H}_{13}\text{O}_2$  [ $\text{M}^+$ ]: 304.0099, found: 304.0100.

### 2,6-Dimethylphenyl 2-methylbenzoate (SI-3)

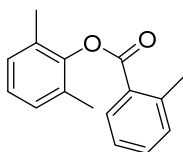

From 2,6-dimethylphenol (2.5 g, 20.5 mmol, 1.0 equiv) and *o*-toluoyl chloride (2.7 ml, 20.5 mmol, 1.0 equiv), following the general procedure described above, compound **SI-3** was obtained in 99% yield as a colorless oil.  $R_f = 0.50$  (10% ethyl acetate/hexanes).

$^1\text{H-NMR}$  (300 MHz,  $\text{CDCl}_3$ ):  $\delta$  8.30 (d,  $J = 7.6$  Hz, 1H), 7.56 (t,  $J = 7.2$  Hz, 1H), 7.46 – 7.35 (m, 2H), 7.22 – 7.14 (m, 3H), 2.76 (s, 3H), 2.29 (s, 6H).  $^{13}\text{C-NMR}$  (75 MHz,  $\text{CDCl}_3$ ):  $\delta$  165.1, 148.5, 141.3, 132.7, 132.1, 131.1, 130.4, 128.7, 128.6, 126.1, 125.9, 22.0, 16.6. **HRMS** ( $\text{EI}^+$ ) calculated for  $\text{C}_{16}\text{H}_{16}\text{O}_2$  [ $\text{M}^+$ ]: 240.1150, found: 240.1152.

<sup>5</sup> Ren, W.; Emi, A.; Yamane, M. *Synthesis*, **2011**, *14*, 2303.



### 3.2.2. General procedure for the synthesis of (4-hydroxy-3,5-dimethylphenyl)arylmethanones, step B<sup>6</sup>

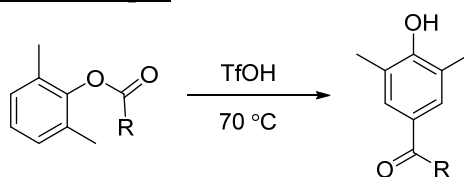

|                                                |      |
|------------------------------------------------|------|
| R = 2-naphthyl                                 | SI-4 |
| R = <i>p</i> -Br-C <sub>6</sub> H <sub>4</sub> | SI-5 |
| R = <i>o</i> -Me-C <sub>6</sub> H <sub>4</sub> | SI-6 |

Triflic acid (0.3 mL/ 1 mmol) was added to the corresponding ester (SI-1-3) at 0 °C, and then it was stirred at 70 °C until completion (checked by TLC). The reaction mixture was cooled at room temperature and then poured into an ice-water bath and the layers were separated. The aqueous phase was extracted with EtOAc (x3) and then neutralized with a saturated sodium bicarbonate solution. The resulting aqueous layer was extracted with EtOAc (x2) and the combined organic layers were dried over Na<sub>2</sub>SO<sub>4</sub>, filtered and concentrated. The crude product was purified by flash column chromatography (cyclohexane/EtOAc) as indicated in each case. In some cases crude products were used in the next step without further purification.

#### 4-(4-Bromophenyl)-4-(hydroxy-3,5-dimethylphenyl)methanone (SI-4)

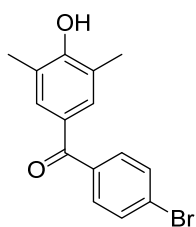

From SI-2 (5.9 g, 19.1 mmol, 1.0 equiv) and triflic acid, following the general procedure described above, compound SI-4 was obtained in 92% yield after purification by column chromatography (33% EtOAc/hexanes) as a white solid.  $R_f = 0.28$  (33% hexanes/ethyl acetate).

<sup>1</sup>H-NMR (300 MHz, CDCl<sub>3</sub>): δ 7.62 (s, 4H), 7.48 (s, 2H), 2.28 (s, 6H). <sup>13</sup>C-NMR (75 MHz, CDCl<sub>3</sub>): δ 194.8, 156.6, 137.2, 131.4, 131.4, 131.3, 129.3, 126.7, 123.0, 15.8. HRMS (EI<sup>+</sup>) calculated for C<sub>15</sub>H<sub>13</sub>O<sub>2</sub>Br [M<sup>+</sup>]: 304.0099, found: 304.0095. mp = 142-144 °C.

#### (4-Hydroxy-3, 5-dimethylphenyl)(*o*-tolyl)methanone (SI-5)

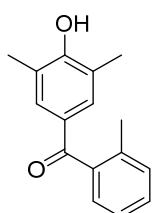

From SI-3 (4.7 g, 19.5 mmol, 1.0 equiv) and triflic acid, following the general procedure described above, compound SI-5 was obtained in 81% yield after purification by column chromatography (20% EtOAc/ hexanes) as a brown solid.  $R_f = 0.12$  (10% EtOAc/hexanes).

<sup>1</sup>H-NMR (300 MHz, CDCl<sub>3</sub>): δ 7.41 (s, 2H), 7.33–7.25 (m, 1H), 7.21 (s, 1H), 7.18 (s, 2H), 2.22 (s, 3H), 2.18 (s, 6H). <sup>13</sup>C-NMR (75 MHz, CDCl<sub>3</sub>): δ 197.8, 157.0, 139.4, 136.1, 131.4, 130.8, 130.0, 129.6, 127.8, 125.1, 123.0, 19.7, 15.8. HRMS (EI<sup>+</sup>) calculated for C<sub>16</sub>H<sub>16</sub>O<sub>2</sub> [M<sup>+</sup>]: 240.1150, found: 240.1142. mp = 173-175 °C.

<sup>6</sup> Olah, M. G.; Robbins, J. S.; Baker, M. S. and Phillips, S.T. *Macromolecules*, **2013**, *46*, 5924.

### (4-Hydroxy-3,5-dimethylphenyl)(naphthalen-2-yl)methanone (SI-6)

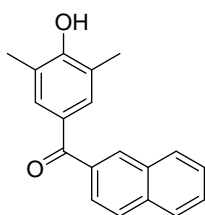

From **SI-1** (5.1 g, 18.4 mmol, 1.0 equiv) and triflic acid, following the general procedure described above, compound **SI-6** was obtained in 98% yield as a yellow solid and used in the next step without further purification.  $R_f = 0.21$  (10% EtOAc/hexanes).

$^1\text{H-NMR}$  (300 MHz,  $\text{CDCl}_3$ ):  $\delta$  8.23 (s, 1H), 7.93 (t,  $J = 7.8$  Hz, 3H), 7.87 (dd,  $J = 8.6, 1.6$  Hz, 1H), 7.66–7.51 (m, 4H), 2.31 (s, 6H).  $^{13}\text{C-NMR}$  (75 MHz,  $\text{CDCl}_3$ ):  $\delta$  196.5, 156.8, 136.1, 135.4, 132.7, 131.9, 131.4, 130.3, 129.6, 128.4, 128.3, 128.2, 127.0, 126.3, 123.2, 16.2. **HRMS** ( $\text{EI}^+$ ) calculated for  $\text{C}_{19}\text{H}_{16}\text{O}_2$  [ $\text{M}^+$ ]: 276.1150, found: 276.1150. **mp** = 162–164 °C.

### 3.2.3. General procedure for the synthesis of diaryl methanes, step C<sup>6</sup>

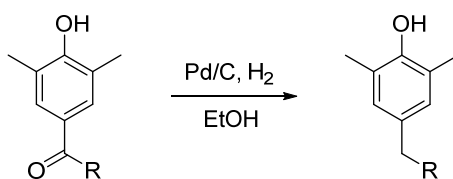

R = 2-naphtyl

**SI-7**

R = *o*-Me- $\text{C}_6\text{H}_4$

**SI-8**

Palladium (10% by weight on carbon powder) (0.05 equiv) was added to a solution of the corresponding ketone (**SI-5-6**) (1.0 equiv) in ethanol (3.1 mL, 1.0 mmol) under argon atmosphere. The flask was evacuated and purged with  $\text{H}_2$  gas (~1 atm, balloon). The reaction mixture was stirred vigorously at room temperature until completion by TLC. The reaction mixture was filtered through a pad of celite and concentrated. The crude of product was purified by flash column chromatography as indicated in each case.

### 2,6-Dimethyl-4-(2-methylbenzyl)phenol (SI-7)

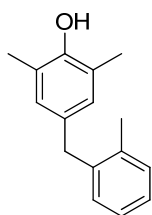

From **SI-5** (1.0 g, 4.2 mmol, 1.0 equiv) and Pd/C, following the general procedure described above, compound **SI-7** was obtained in 98% yield after purification by column chromatography (25% EtOAc/hexanes) as a white solid.  $R_f = 0.77$  (25% EtOAc/hexanes).

$^1\text{H-NMR}$  (300 MHz,  $\text{CDCl}_3$ ):  $\delta$  7.18–7.06 (m, 4H), 6.75 (s, 2H), 4.46 (s, 1H), 3.86 (s, 2H), 2.27 (s, 3H), 2.21 (s, 6H).  $^{13}\text{C-NMR}$  (75 MHz,  $\text{CDCl}_3$ ):  $\delta$  150.3, 139.5, 136.5, 131.9, 130.2, 129.8, 128.9, 126.2, 125.9, 122.9, 38.5, 19.7, 15.9. **HRMS** ( $\text{EI}^+$ ) calculated for  $\text{C}_{16}\text{H}_{18}\text{O}$  [ $\text{M}^+$ ]: 226.1358, found: 226.1362. **mp** = 74–76 °C.

### 2,6-Dimethyl-4-(naphthalen-2-ylmethyl)phenol (SI-8)

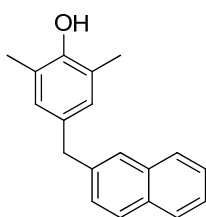

From **SI-6** (1.0 g, 3.6 mmol, 1.0 equiv) and Pd/C, following the general procedure described above, compound **SI-8** was obtained in 50% yield as a yellow solid.  $R_f = 0.56$  (20% EtOAc/hexanes).

$^1\text{H-NMR}$  (300 MHz,  $\text{CDCl}_3$ ):  $\delta$  8.13–8.00 (m, 3H), 7.89 (s, 1H), 7.76–7.66 (m, 3H), 7.58 (d,  $J = 8.4$  Hz, 1H), 7.11 (s, 2H), 4.75 (s, 1H), 4.28 (s, 2H), 2.47 (s, 6H).  $^{13}\text{C-NMR}$  (75 MHz,  $\text{CDCl}_3$ ):  $\delta$  150.6, 139.3, 133.7, 132.6, 132.1, 129.2, 128.0, 127.7 (2C), 127.6, 126.9, 125.9, 125.3, 123.1, 41.3, 15.9. **HRMS (EI<sup>+</sup>)** calculated for  $\text{C}_{19}\text{H}_{18}\text{O}$  [ $\text{M}^+$ ]: 262.1358, found: 262.1366. **mp** = 80–82 °C.

#### 3.2.4. Synthesis of 4-[(4-bromophenyl)(hydroxy)methyl]-2,6-dimethylphenol, step D

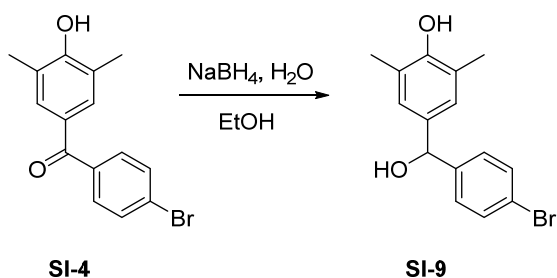

A solution of sodium borohydride (272.6 mg, 7.2 mmol, 1.1 equiv) in  $\text{H}_2\text{O}$  (1.1 mL/ 1.0 mmol) was added to a solution of **SI-4** (2.0 g, 6.6 mmol, 1.1 equiv) in EtOH (21 mL). After stirring 5 h, the reaction mixture was added to a mixture of ice-water and concentrated HCl, and the product was extracted with AcOEt (x3). The combined organic layers were subsequently washed with a saturated solution of  $\text{NaHCO}_3$  (x2). The product was used in the next step without further purification. Compound **SI-9** was obtained in 70% yield as a white solid.  $R_f = 0.30$  (25% EtOAc/hexanes).

$^1\text{H-NMR}$  (300 MHz,  $\text{CDCl}_3$ ):  $\delta$  7.51 (d,  $J = 7.3$  Hz, 2H), 7.31 (d,  $J = 5.6$  Hz, 2H), 6.98 (s, 2H), 5.73 (s, 1H), 4.69 (s, 1H), 2.27 (s, 6H).  $^{13}\text{C-NMR}$  (75 MHz,  $\text{CDCl}_3$ ):  $\delta$  151.9, 143.1, 135.2, 131.4, 128.1, 127.0, 123.2, 121.1, 75.4, 15.9. **HRMS (ESI<sup>+</sup>)** calculated for  $\text{C}_{15}\text{H}_{14}\text{BrO}$  [ $\text{M-OH}]^+$ : 289.0222, found: 289.0218. **mp** = 138–140 °C.

### 3.2.5. Synthesis of 4-(4-bromobenzyl)-2,6-dimethylphenol, step E<sup>7</sup>

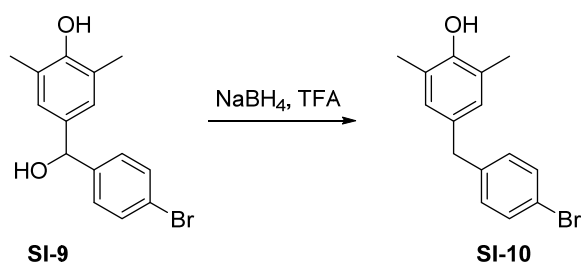

Sodium borohydride (695.5 mg, 18.4 mmol, 4.0 equiv) was slowly added to trifluoroacetic acid (61 mL) at 0 °C. (*This addition must be done carefully: large amount of hydrogen gas is released in the process*). When the addition was completed, alcohol **SI-9** (1.4 g, 4.6 mmol, 1.0 equiv) was added and the reaction mixture stirred 1 hour at room temperature. Water was added and the reaction mixture was neutralized with NaHCO<sub>3</sub> and the aqueous layer extracted with Et<sub>2</sub>O (x3). The combined organic layers were washed with saturated NaCl solution, dried over Na<sub>2</sub>SO<sub>4</sub>, filtered and concentrated. The product was used in the next step without further purification. Compound **SI-10** was obtained in 75% yield as an orange solid.  $R_f = 0.65$  (25% EtOAc/hexanes).

<sup>1</sup>H-NMR (300 MHz, CDCl<sub>3</sub>): δ 7.50 (d,  $J = 8.3$  Hz, 2H), 7.16 (d,  $J = 8.2$  Hz, 2H), 6.88 (s, 2H), 4.72 (s, 1H), 3.90 (s, 2H), 2.32 (s, 6H). <sup>13</sup>C-NMR (75 MHz, CDCl<sub>3</sub>): δ 150.7, 140.8, 132.1, 131.5, 130.6, 129.0, 123.1, 119.8, 40.5, 15.9. HRMS (EI<sup>+</sup>) calculated for C<sub>15</sub>H<sub>15</sub>OBr [M<sup>+</sup>]: 290.0306, found: 290.0303. mp = 58-60 °C.

<sup>7</sup> Bringmann, G.; Pabst, T.; Henschel, P; Michel, M. *Tetrahedron*, **2001**, 57, 1269.

### 3.2.6. General procedure for the synthesis of 2,6-dimethylquinometanes, step F<sup>8,9</sup>

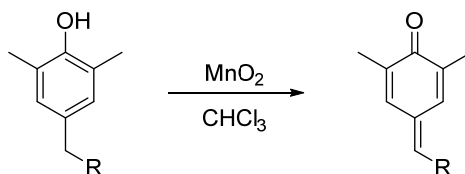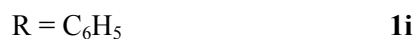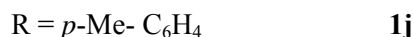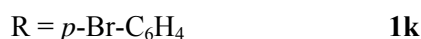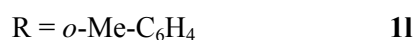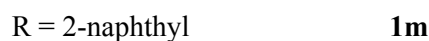

Activated MnO<sub>2</sub> was added to a solution of the corresponding diarylmethane in CHCl<sub>3</sub> and the reaction mixture was stirred at room temperature until completion (checked by TLC). The crude product was filtered through a pad of celite and concentrated. The product was used in the next step without further purification.

Compounds **1i** and **1j** have been previously described in the literature.<sup>6,9</sup>

#### 4-(4-Bromobenzylidene)-2,6-dimethylcyclohexa-2,5-dienone (**1k**)

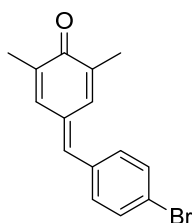

From **SI-10** (100.0 mg, 0.3 mmol, 1.0 equiv) and MnO<sub>2</sub> (1.4 g, 16.7 mmol, 48.5 equiv) in CHCl<sub>3</sub> (31.2 mL), following the general procedure described above, compound **1k** was obtained in 96% yield as a yellow solid.  $R_f = 0.47$  (33% Et<sub>2</sub>O/hexanes).

<sup>1</sup>H-NMR (300 MHz, CDCl<sub>3</sub>):  $\delta$  7.59 (d,  $J = 8.5$  Hz, 2H), 7.44 (bs, 1H), 7.33 (d,  $J = 8.2$  Hz, 2H), 7.07 (s, 1H), 7.04 (bs, 1H), 2.06 (s, 6H). <sup>13</sup>C-NMR (75 MHz, CDCl<sub>3</sub>):  $\delta$  187.2, 140.8, 138.6, 138.0, 136.0, 134.5, 132.2, 132.0, 131.8, 130.8, 123.8, 16.9, 16.2. HRMS (EI<sup>+</sup>) calculated for C<sub>15</sub>H<sub>13</sub>BrO [M<sup>+</sup>]: 288.0150, found: 288.0156. mp = 98-100 °C.

<sup>8</sup> Nagakawa, R; Takahiro, U; Kubo, M; Itoh, T; *Polym. Bull.* **2012**, *68*, 1831.

<sup>9</sup> Lin, L.-T. W.; Bromps, W.; Chin., T. Y. *J. Polym. Sci., Part A: Polym. Chem.*, **1993**, *31*, 3239.

### 2,6-Dimethyl-4-(2-methylbenzylidene)cyclohexa-2,5-dien-1-one (**1l**)

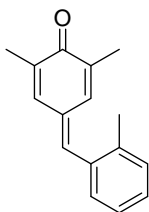

From **SI-7** (235.8 mg, 1.0 mmol, 1.0 equiv) and MnO<sub>2</sub> (4.4 g, 50.4 mmol, 48.5 equiv) in CHCl<sub>3</sub> (95 mL), following the general procedure described above, compound **1l** was obtained in 99% yield as a yellow solid.  $R_f = 0.39$  (20% EtOAc/hexanes).

<sup>1</sup>H-NMR (300 MHz, CDCl<sub>3</sub>):  $\delta$  7.41-7.25 (m, 6H), 7.15 (s, 1H), 2.38 (s, 3H), 2.11 (s, 3H), 2.06 (s, 3H). <sup>13</sup>C-NMR (75 MHz, CDCl<sub>3</sub>):  $\delta$  187.4, 141.8, 138.5, 137.7, 137.5, 135.8, 134.6, 132.0, 131.8, 130.9, 130.4, 129.3, 125.9, 20.1, 16.7, 16.2. HRMS (EI<sup>+</sup>) calculated for C<sub>16</sub>H<sub>16</sub>O [M<sup>+</sup>]: 224.1201, found: 224.1207. mp = 80-82. °C.

### 2,6-Dimethyl-4-(naphthalen-2-ylmethylene)cyclohexa-2,5-dien-1-one (**1m**)

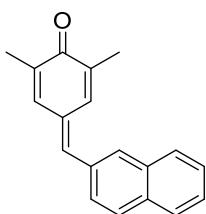

From **SI-8** (50.0 mg, 0.2 mmol, 1.0 equiv) and MnO<sub>2</sub> (801.2 mg, 9.2 mmol, 48.5 equiv) in CHCl<sub>3</sub> (7.0 mL), following the general procedure described above, compound **1m** was obtained in 98% yield as yellow solid.  $R_f = 0.51$  (20% EtOAc/hexanes).

<sup>1</sup>H-NMR (300 MHz, CDCl<sub>3</sub>)  $\delta$  7.97-7.83 (m, 4H), 7.62 (s, 1H), 7.61-7.52 (m, 2H), 7.32 (s, 1H), 7.12 (s, 1H), 2.10 (s, 3H), 2.09 (s, 3H). <sup>13</sup>C-NMR (75 MHz, CDCl<sub>3</sub>):  $\delta$  187.3, 142.7, 138.9, 137.8, 135.8, 133.4, 133.2 (2C), 132.0, 131.5, 130.8, 128.6, 128.5, 127.8, 127.4, 127.3, 126.9, 16.9, 16.3. HRMS (EI<sup>+</sup>) calculated for C<sub>19</sub>H<sub>16</sub>O [M<sup>+</sup>]: 260.1201, found: 260.1205. mp = 88-90 °C.

### 3.3. Synthesis of 2,6-diisopropyl *p*-quinone methide **1n**

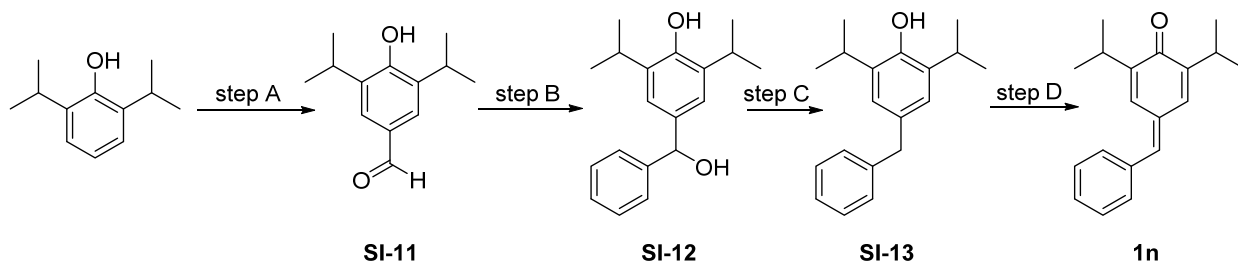

#### 3.3.1. Synthesis of 4-hydroxy-3,5-diisopropylbenzaldehyde (SI-11), step A<sup>10,11</sup>

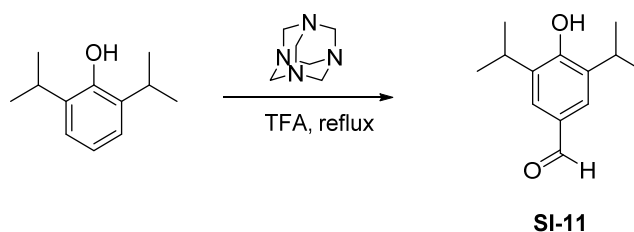

2,6-diisopropylphenol (8.0 g, 44.8 mmol, 1.0 equiv), hexamethylenetetramine (12.6 g, 89.6 mmol, 2.0 equiv) and trifluoroacetic acid were mixed in a round bottom flask (44 mL) and the solution was heated under reflux for 12 hours. The reaction mixture was cooled at room temperature and neutralized with NaHCO<sub>3</sub>. The aqueous layer was extracted with EtOAc (x3) and the combined organic layers were concentrated. The crude product was dissolved in a solution of HCl 3.0M and stirred under reflux for 3 hours. The precipitated was filtered, washed with water and purified by recrystallization from EtOH. Compound **SI-11** was obtained in 98% yield as a white solid, as reported in the literature.<sup>10</sup>  $R_f = 0.66$  (25% hexanes/EtOAc).

<sup>1</sup>H-NMR (300 MHz, CDCl<sub>3</sub>):  $\delta$  9.86 (s, 1H), 7.62 (s, 2H), 5.43 (s, 1H), 3.18 (sept,  $J = 6.9$  Hz, 2H), 1.31 (d,  $J = 6.8$  Hz, 12H). <sup>13</sup>C-NMR (75 MHz, CDCl<sub>3</sub>):  $\delta$  192.1, 156.4, 134.7, 129.7, 126.4, 27.2, 22.7.

<sup>10</sup> Kurlovich, A. L.; Terasevich, V. A.; Kozlov, N. G. *Russ. J. Org. Chem.* **2009**, *45*, 1503.

<sup>11</sup> Geurink, P. P.; Florea, B. I.; Li, N.; Witte, M. D.; Verasdonck, J.; Kuo, C.-L.; van der Marel, G. A.; Overkleeft, H. S. *Angew. Chem. Int. Ed.* **2010**, *49*, 6802.

### 3.3.2. Synthesis of 4-(hydroxy(phenyl)methyl)-2,6-diisopropylphenol (SI-12), step B<sup>12</sup>

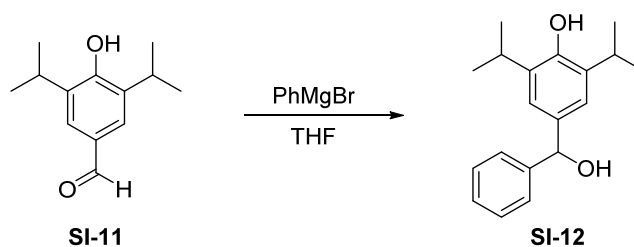

To magnesium turnings (302 mg, 12.6 mmol, 2.6 equiv) in dry THF (2 mL), a solution of bromobenzene (1.23 mL, 11.7 mmol, 2.4 equiv) in dry THF (10 mL) was added dropwise under argon atmosphere. After 2 hours of reflux, the mixture was cooled at room temperature and a solution of **SI-11** (1.0 g, 4.8 mmol, 1.0 equiv) in dry THF (10 mL) was added dropwise and stirred for 12 hours. Then, the reaction mixture was hydrolyzed with saturated aqueous NH<sub>4</sub>Cl solution. The aqueous layer was extracted with Et<sub>2</sub>O (x3) and the combined organic layers were washed with brine, dried over Na<sub>2</sub>SO<sub>4</sub>, filtered and concentrated. The product was obtained without further purification. Compound **SI-12** was obtained in 99% yield as a white solid.  $R_f = 0.22$  (20% Et<sub>2</sub>O/hexanes).

<sup>1</sup>H-NMR (300 MHz, CDCl<sub>3</sub>)  $\delta$  7.42–7.19 (m, 5H), 7.04 (s, 2H), 5.77 (s, 1H), 4.83 (s, 1H), 3.11 (sept,  $J = 6.9$  Hz, 2H), 1.22 (d,  $J = 6.8$  Hz, 6H). <sup>13</sup>C-NMR (75 MHz, CDCl<sub>3</sub>)  $\delta$  149.6, 144.2, 135.9, 133.8, 128.4, 127.3, 126.5, 122.1, 76.5, 27.4, 22.7. HRMS (EI<sup>+</sup>) calculated for C<sub>19</sub>H<sub>24</sub>O<sub>2</sub> [M<sup>+</sup>]: 284.1776, found: 284.1773. mp = 94–96 °C.

### 3.3.3. Synthesis of 4-benzyl-2,6-diisopropylphenol (SI-13), step C<sup>7</sup>

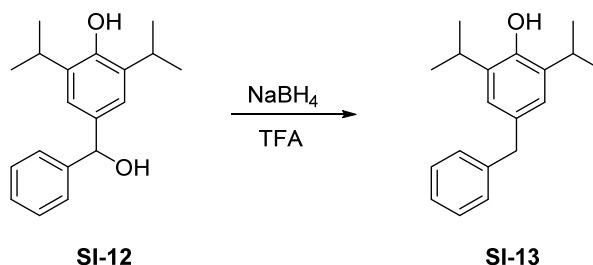

Sodium borohydride (680.4 mg, 18.0 mmol, 4.0 equiv) was added to trifluoroacetic acid (39 mL) in small portions at 0 °C. (*This addition must be done carefully: large amount of hydrogen gas is released in the process*). Then the alcohol **SI-12** (1.3 g, 4.5 mmol, 1.0 equiv) was added and the reaction mixture was stirred 15 min at room temperature. Water was added, the aqueous layer was neutralized with NaHCO<sub>3</sub> and extracted with Et<sub>2</sub>O (x3). The combined organic layers were washed with brine, dried over Na<sub>2</sub>SO<sub>4</sub>, filtered and concentrated. The product was used in the next step without further purification. Compound **SI-13** was obtained in 85% yield as an orange solid.  $R_f = 0.67$  (25% EtOAc/hexanes).

<sup>1</sup>H-NMR (300 MHz, CDCl<sub>3</sub>):  $\delta$  7.41–7.16 (m, 5H), 6.94 (s, 2H), 4.75 (bs, 1H), 3.98 (s, 2H), 3.18 (sept,  $J = 6.9$ , 2H), 1.30 (d,  $J = 6.8$  Hz, 12H). <sup>13</sup>C-NMR (75 MHz, CDCl<sub>3</sub>):  $\delta$  148.4, 142.0,

<sup>12</sup> Richter, D.; Hampel, N.; Singer, T.; Ofial, A. R.; Mayr, H. *Eur. J. Org. Chem.*, **2009**, 3203.



133.8, 132.9, 128.8, 128.4, 125.9, 124.2, 41.8, 27.4, 22.8. **HRMS (EI<sup>+</sup>)** calculated for C<sub>19</sub>H<sub>24</sub>O [M<sup>+</sup>]: 268.1827, found: 268.1836. **mp** = 34-36 °C.

### **3.3.4. Synthesis for 4-benzylidene-2,6-diisopropylcyclohexa-2,5-dienone 1n, step D**<sup>8</sup>

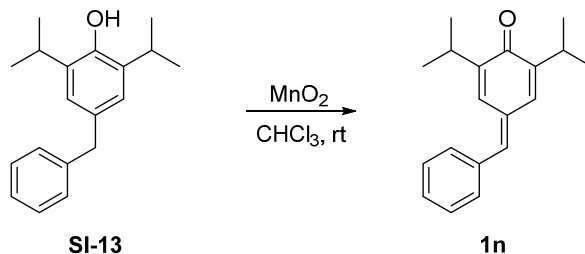

Activated MnO<sub>2</sub> (10 equiv) was added to solution of compound **SI-13** in CHCl<sub>3</sub> (16.4 mL) and the reaction mixture was stirred at room temperature for 15 min. The crude product was filtered through a pad of celite and concentrated. The product was used in the next step without further purification. Compound **1n** was obtained in 98% yield as an orange-red solid, as reported in literature.<sup>3</sup> **R<sub>f</sub>** = 0.66 (25% EtOAc/hexanes).

**<sup>1</sup>H-NMR** (300 MHz, CDCl<sub>3</sub>): δ 7.51-7.45 (m, 5H), 7.26 (s, 1H), 7.23 (s, 1H), 6.99 (s, 1H), 3.28-3.11 (sept, *J* = 6.9 Hz, 2H), 1.17 (d, *J* = 6.9 Hz, 6H), 1.13 (d, *J* = 6.9 Hz, 6H). **<sup>13</sup>C-NMR** (75 MHz, CDCl<sub>3</sub>): δ 185.3, 147.5, 145.9, 142.7, 135.9, 134.9, 132.1, 130.5, 129.2, 128.8, 127.5, 27.0, 26.6, 22.0. **HRMS (EI<sup>+</sup>)** calculated for C<sub>19</sub>H<sub>22</sub>O [M<sup>+</sup>]: 266.1671, found: 266.1668.

#### 4. General Procedure for the synthesis of chiral dibenzylic boronates **2a-2p**

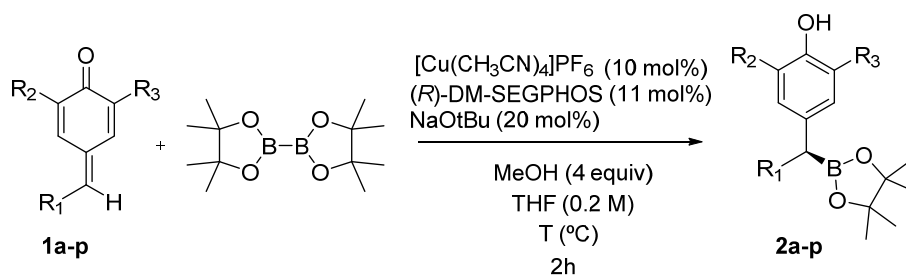

An oven-dried vial was charged with [Cu(CH<sub>3</sub>CN)<sub>4</sub>]PF<sub>6</sub> (7.5 mg, 0.02 mmol, 10.0 mol%), (*R*)-DM-SEGPHOS (26 mg, 0.022 mmol, 11.0 mol%) and B<sub>2</sub>pin<sub>2</sub> (76 mg, 0.3 mmol, 1.5 equiv) and sealed with a septum. The vial was connected to an argon-vacuum line, evacuated and backfilled with argon (x3). THF (0.5 mL) and NaOt-Bu solution (2M in THF, 20 μL, 0.04 mmol, 20.0 mol%) was then added and the dark brown solution was stirred for 15 min. The *p*-quinone methide **1** (0.2 mmol, 1.0 equiv) was connected to an argon-vacuum line, evacuated and backfilled with argon (x3), dissolved in 0.5 mL of THF, and finally added to the reaction mixture at 0 °C, followed by methanol (32 μL, 0.8 mmol, 4.0 equiv). Then, the reaction mixture was stirred for 2 hours at the optimized temperature for each case (rt or 0 °C). Reaction was diluted with Et<sub>2</sub>O and concentrated under reduced pressure. The crude product was purified by flash-column chromatography (eluents indicated in each case). *The racemic products were obtained using SIMes as ligand and following the procedure described above.*

#### (*S*)-2,6-di-*tert*-Butyl-4-[phenyl(4,4,5,5-tetramethyl-1,3,2-dioxaborolan-2-yl)methyl]phenol (**2a**)

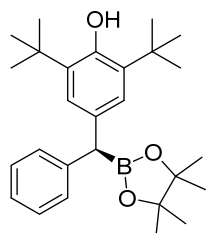

From **1a** (59 mg, 0.2 mmol), following the general procedure described above (rt), compound (*S*)-**2a** (80.5 mg, 0.19 mmol) was obtained in 95% yield after purification by column chromatography (6% Et<sub>2</sub>O/hexanes) as a white solid. *R<sub>f</sub>* = 0.45 (6% Et<sub>2</sub>O/hexanes).

<sup>1</sup>H-NMR (δ (75 MHz, CDCl<sub>3</sub>): 7.25-7.18 (m, 4H), 7.17-7.09 (m, 1H), 7.06 (s, 2H), 4.99 (s, 1H), 3.76 (s, 1H), 1.39 (s, 18H), 1.23 (s, 12H). <sup>13</sup>C-NMR (75 MHz, CDCl<sub>3</sub>): δ 151.8, 143.0, 136.5, 132.0, 128.8, 128.2, 126.0, 125.2, 83.5, 34.3, 30.3, 24.7, 24.6 [note: the carbon attached to boron was not observed due to quadrupole broadening caused by the <sup>11</sup>B nucleus]. HRMS (EI+): calculated for [M<sup>+</sup>], C<sub>27</sub>H<sub>39</sub>BO<sub>3</sub>: 422.2992, found 422.2979. Compound (*S*)-**2a** was oxidized to compound (*S*)-**3a** (see general procedure below) to determine the enantiomeric ratio. Compound (*S*)-**3a** was obtained with a 96:4 enantiomeric ratio determined by HPLC using Chiralpak-IA column [Hexane/<sup>*i*</sup>PrOH (98:2), 1.0 mL/min]: τ<sub>major</sub> = 9.0 min, τ<sub>minor</sub> = 7.9 min. [α]<sub>D</sub><sup>20</sup> = +20.6 (c = 1.0, CHCl<sub>3</sub>). mp = 105-107 °C.

**(S)-2,6-di-tert-Butyl-4-[naphthalen-2-yl(4,4,5,5-tetramethyl-1,3,2-dioxaborolan-2-yl)methyl]phenol (2b)**

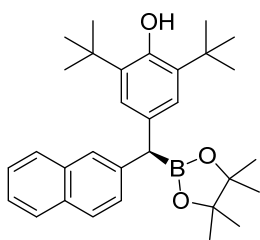

From **1b** (69 mg, 0.2 mmol), following the general procedure described above (0 °C), compound (*S*)-**2b** (79.1 mg, 0.16 mmol) was obtained in 78% yield after purification by column chromatography (3.33% Et<sub>2</sub>O/hexanes) as a yellow oil. *R<sub>f</sub>* = 0.58 (3% Et<sub>2</sub>O/hexanes).

**<sup>1</sup>H-NMR** (300 MHz, CDCl<sub>3</sub>): δ 7.82-7.72 (m, 3H), 7.64 (s, 1H), 7.46-7.38 (m, 3H), 7.15 (s, 2H), 5.03 (s, 1H), 3.96 (s, 1H), 1.42 (s, 18H), 1.25 (s, 12H). **<sup>13</sup>C-NMR** (75 MHz, CDCl<sub>3</sub>): δ 151.9, 140.7, 135.6, 133.8, 132.0, 131.8, 128.8, 127.7, 127.6, 127.5, 126.7, 126.1, 125.5, 124.8, 83.6, 34.4, 30.4, 24.7, 24.6 [note: the carbon attached to boron was not observed due to quadrupole broadening caused by the <sup>11</sup>B nucleus]. **HRMS (EI+)**: calculated for [M]<sup>+</sup> C<sub>31</sub>H<sub>41</sub>BO<sub>3</sub>: 472.3149, found 472.3171. Compound (*S*)-**2b** was oxidized to compound (*S*)-**3b** (see general procedure below) to determine the enantiomeric ratio. Compound (*S*)-**3b** was obtained with a 96:4 enantiomeric ratio determined by SFC using Chiralpak-IB column [CO<sub>2</sub>/MeOH (95:5, 3.0 mL/min): τ<sub>major</sub> = 16.5 min, τ<sub>minor</sub> = 15.2 min. [α]<sub>D</sub><sup>20</sup> = +19.0 (c = 0.8, CHCl<sub>3</sub>).

**(S)-2,6-di-tert-Butyl-4-[(4-methoxyphenyl)(4,4,5,5-tetramethyl-1,3,2-dioxaborolan-2-yl)methyl]phenol (2c)**

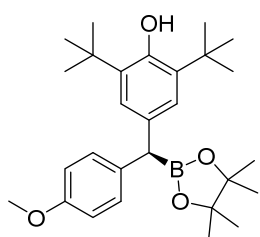

From **1c** (65 mg, 0.2 mmol), following the general procedure described above (rt), compound (*S*)-**2c** (38.6 mg, 0.086 mmol) was obtained in 65% yield after purification by column chromatography (10% Et<sub>2</sub>O/hexanes) as a colorless oil. *R<sub>f</sub>* = 0.37 (10% Et<sub>2</sub>O/hexanes).

**<sup>1</sup>H-NMR** (300 MHz, CDCl<sub>3</sub>): δ 7.14 (d, *J* = 8.7 Hz, 2H), 7.04 (s, 2H), 6.80 (d, *J* = 8.8 Hz, 2H), 4.98 (s, 1H), 3.77 (s, 3H), 3.70 (s, 1H), 1.39 (s, 18H), 1.23 (s, 12H). **<sup>13</sup>C-NMR** (75 MHz, CDCl<sub>3</sub>): δ 157.4, 151.7, 135.5, 135.0, 132.6, 129.8, 125.8, 113.7, 83.4, 55.2, 34.3, 30.4, 24.7, 24.6. [note: the carbon attached to boron was not observed due to quadrupole broadening caused by the <sup>11</sup>B nucleus]. **HRMS (ESI+, MeOH+NaI)**: calculated for [M+Na]<sup>+</sup>, C<sub>28</sub>H<sub>41</sub>BO<sub>4</sub>Na: 475.2990, found 475.2974. Compound (*S*)-**2c** was oxidized to compound (*S*)-**3c** (see general procedure below) to determine the enantiomeric ratio. Compound (*S*)-**3c** was obtained with a 93:7 enantiomeric ratio determined by HPLC using Chiralpak-IA column [Hexane/<sup>i</sup>PrOH (99.5:0.5, 1.0 mL/min): τ<sub>major</sub> = 35.9 min, τ<sub>minor</sub> = 32.9 min. [α]<sub>D</sub><sup>20</sup> = +12.3 (c = 0.8, CHCl<sub>3</sub>).

**(S)-2,6-di-tert-Butyl-4-[(4,4,5,5-tetramethyl-1,3,2-dioxaborolan-2-yl)(*p*-tolyl)methyl]phenol (2d)**

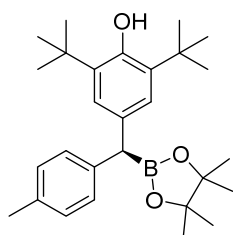

From **1d** (62 mg, 0.2 mmol), following the general procedure described above (rt), compound (*S*)-**2d** (57.6 mg, 0.154 mmol) was obtained in 77% yield after purification by column chromatography (3% Et<sub>2</sub>O/hexanes) as a white solid. *R<sub>f</sub>* = 0.46 (3% Et<sub>2</sub>O/hexanes).

**<sup>1</sup>H-NMR** (300 MHz, CDCl<sub>3</sub>): δ 7.11 (d, *J* = 8.2 Hz, 2H), 7.06 (s, 2H),

7.05 (d,  $J = 8.1$  Hz, 2H), 4.97 (s, 1H), 3.72 (s, 1H), 2.30 (s, 3H), 1.4 (s, 18H), 1.24 (s, 6H), 1.23 (s, 6H).  $^{13}\text{C-NMR}$  (75 MHz,  $\text{CDCl}_3$ ):  $\delta$  151.7, 140.0, 135.5, 134.5, 132.3, 128.9, 128.6, 125.9, 83.4, 34.3, 30.4, 24.7, 24.6, 21.0. [note: the carbon attached to boron was not observed due to quadrupole broadening caused by the  $^{11}\text{B}$  nucleus]. **HRMS (ESI+MeOH+0.1% formic acid):** calculated for  $[\text{M}+\text{Na}]^+$ ,  $\text{C}_{28}\text{H}_{41}\text{BO}_3\text{Na}$ : 459.3040, found 459.3035. Compound (*S*)-**2d** was oxidized to (*S*)-**3d** (see general procedure below) to determine the enantiomeric ratio. Compound (*S*)-**3d** was obtained with a 93:7 enantiomeric ratio determined by SFC using Chiralpak-IA column [ $\text{CO}_2/\text{MeOH}$  (95:5) 3.0 mL/min]  $\tau_{\text{major}}$ : 5.8 min  $\tau_{\text{minor}}$ : 5.4 min.  $[\alpha]_{\text{D}}^{20} = +14.5$  ( $c = 1.0$ ,  $\text{CHCl}_3$ ). **mp** = 85-87 °C.

**(*S*)-2,6-di-*tert*-Butyl-4-[(4,4,5,5-tetramethyl-1,3,2-dioxaborolan-2-yl)](3-(trifluoromethyl)phenyl)methyl]phenol (**2e**)**

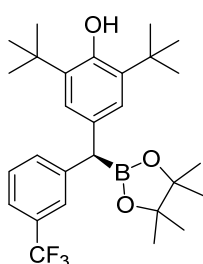

From **1e** (72 mg, 0.2 mmol), following the general procedure described above (rt), compound (*S*)-**2e** (77.5 mg, 0.16 mmol) was obtained in 79% yield after purification by column chromatography (8.33%  $\text{Et}_2\text{O}$ /hexanes) as a colorless oil.  $R_f = 0.50$  (8%  $\text{Et}_2\text{O}$ /hexanes).

$^1\text{H-NMR}$  (300 MHz,  $\text{CDCl}_3$ ):  $\delta$  7.52 (s, 1H), 7.44-7.34 (m, 3H), 7.04 (s, 2H), 5.06 (s, 1H), 3.82 (s, 1H), 1.40 (s, 18H), 1.24 (s, 6H), 1.23 (s, 6H).  $^{13}\text{C-NMR}$  (75 MHz,  $\text{CDCl}_3$ ):  $\delta$  152.1, 144.1, 135.8, 132.2, 131.2, 130.3 (q,  $J = 31.5$  Hz), 128.6, 125.8, 125.6 (q,  $J = 3.8$  Hz), 124.4 (q,  $J = 272.2$  Hz), 122.1 (q,  $J = 3.8$  Hz), 83.8, 34.4, 30.3, 24.6 [note: the carbon attached to boron was not observed due to quadrupole broadening caused by the  $^{11}\text{B}$  nucleus].  $^{19}\text{F-NMR}$  (282 MHz,  $\text{CDCl}_3$ ):  $\delta$  -62.6. **HRMS (EI+):** calculated for  $[\text{M}]^+$ ,  $\text{C}_{28}\text{H}_{38}\text{BO}_3\text{F}_3$ : 490.2866, found 490.2877. Compound (*S*)-**2e** was oxidized to compound (*S*)-**3e** (see general procedure below) to determine the enantiomeric ratio. Compound (*S*)-**3e** was obtained with a 94:6 enantiomeric ratio determined by SFC using Chiralpak-IB column [ $\text{CO}_2/\text{MeOH}$  (98:2) 1.0 mL/min]  $\tau_{\text{major}}$ : 19.0 min  $\tau_{\text{minor}}$ : 17.9 min.  $[\alpha]_{\text{D}}^{20} = +17.4$  ( $c = 1.0$ ,  $\text{CHCl}_3$ ).

**(*S*)-4-[(4-Bromophenyl)(4,4,5,5-tetramethyl-1,3,2-dioxaborolan-2-yl)methyl]-2,6-di-*tert*-butylphenol (**2f**)**

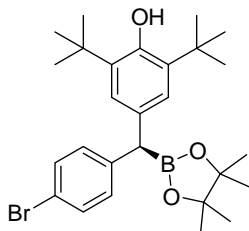

From **1f** (75 mg, 0.2 mmol), following the general procedure described above (rt), compound (*S*)-**2f** (84.4 mg, 0.17 mmol) was obtained in 84% yield after purification by column chromatography (5%  $\text{Et}_2\text{O}$ /hexanes) as a white solid.  $R_f = 0.55$  (3%  $\text{Et}_2\text{O}$ /hexanes).

$^1\text{H-NMR}$  (300 MHz,  $\text{CDCl}_3$ ):  $\delta$  7.36 (d,  $J = 8.4$  Hz, 2H), 7.08 (d,  $J = 8.4$  Hz, 2H), 7.03 (s, 2H), 5.02 (s, 1H), 3.71 (s, 1H), 1.40 (s, 18H), 1.24 (s, 6H), 1.23 (s, 6H).  $^{13}\text{C-NMR}$  (75 MHz,  $\text{CDCl}_3$ ):  $\delta$  152.3, 142.6, 136.1, 131.9, 131.6, 130.9, 126.2, 119.4, 84.0, 34.7, 30.7, 25.6, 25.0. [note: the carbon attached to boron was not observed due to quadrupole broadening caused by the  $^{11}\text{B}$  nucleus]. **HRMS (ESI+, MeOH+NaI):** calculated for  $[\text{M}+\text{NaBr}]^+$   $\text{C}_{27}\text{H}_{38}\text{BO}_3\text{NaBr}$ : 523.1989, found 523.1977. Compound (*S*)-**2f** was oxidized to compound (*S*)-**3f** (see general procedure below) to determine the enantiomeric ratio. Compound (*S*)-**3f** was obtained with a 96:4 enantiomeric ratio determined by SFC using

Chiralpak-IA column [CO<sub>2</sub>/MeOH (95:5, 3.0 mL/min):  $\tau_{\text{major}} = 7.4$  min,  $\tau_{\text{minor}} = 6.7$  min.  $[\alpha]_{\text{D}}^{20} = +20.3$  ( $c = 1.0$ , CHCl<sub>3</sub>). **mp** = 102-104 °C.

**(R)-4-[(2-Bromophenyl)(4,4,5,5-tetramethyl-1,3,2-dioxaborolan-2-yl)methyl]-2,6-di-tert-butylphenol (2g)**

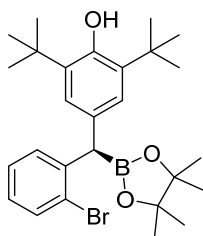

From **1g** (75 mg, 0.2 mmol), following the general procedure described above (rt), compound (*R*)-**2g** (69.2 mg, 0.14 mmol) was obtained in 69% yield after purification by column chromatography (3% Et<sub>2</sub>O/hexanes) as a white solid.  $R_f = 0.25$  (3% Et<sub>2</sub>O/hexanes).

<sup>1</sup>H-NMR (300 MHz, CDCl<sub>3</sub>):  $\delta$  7.53 (d,  $J = 8.1$  Hz, 1H), 7.16 (t,  $J = 7.5$  Hz, 1H), 7.07 (s, 2H), 7.00 (m, 2H), 5.07 (s, 1H), 4.09 (s, 1H), 1.43 (s, 18H), 1.28 (s, 6H), 1.22 (s, 6H). <sup>13</sup>C-NMR (75 MHz, CDCl<sub>3</sub>):  $\delta$  152.2, 143.5, 135.9, 132.2, 130.1, 129.8, 127.3, 126.8, 126.6, 124.7, 83.7, 34.4, 30.3, 24.8, 24.7. [note: the carbon attached to boron was not observed due to quadrupole broadening caused by the <sup>11</sup>B nucleus]. **HRMS (ESI+, MeOH+0.1% formic acid)**: calculated for [M+H]<sup>+</sup>, C<sub>27</sub>H<sub>39</sub>BO<sub>3</sub>Br: 501.2170, found 501.2183. Compound (*R*)-**2g** was oxidized to compound (*R*)-**3g** (see general procedure below) to determine the enantiomeric ratio. Compound (*R*)-**3g** was obtained with a 96:4 enantiomeric ratio determined by SFC using Chiralpak-IB column [CO<sub>2</sub>/MeOH (97:3) 3.0 mL/min]  $\tau_{\text{major}} : 9.8$  min  $\tau_{\text{minor}} : 9.2$  min.  $[\alpha]_{\text{D}}^{20} = +90.6$  ( $c = 1.0$ , CHCl<sub>3</sub>). **mp** = 170-172 °C.

**(S)-2,6-di-tert-Butyl-4-[1-(4,4,5,5-tetramethyl-1,3,2-dioxaborolan-2-yl)ethyl]phenol (2h)**

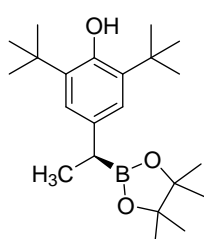

From **1h**<sup>13</sup> (47 mg, 0.2 mmol), following the general procedure described above (rt), compound (*S*)-**2h** (54 mg, 0.15 mmol) was obtained in 76% yield after purification by column chromatography (4% Et<sub>2</sub>O/hexanes) as a yellow solid.  $R_f = 0.62$  (17% Et<sub>2</sub>O/hexanes).

<sup>1</sup>H-NMR (300 MHz, CDCl<sub>3</sub>):  $\delta$  7.01 (s, 2H), 4.94 (s, 1H), 2.33 (q,  $J = 7.4$  Hz, 1H), 1.42 (s, 18H), 1.28 (d,  $J = 7.5$  Hz, 3H), 1.24 (s, 6H), 1.22 (s, 6H). <sup>13</sup>C-NMR (75 MHz, CDCl<sub>3</sub>):  $\delta$  151.4, 135.5, 135.3, 124.5, 83.1, 34.4, 30.4, 24.7, 18.0. [note: the carbon attached to boron was not observed due to quadrupole broadening caused by the nucleus]. **HRMS (ESI+, MeOH+0.1% formic acid+NaCl)**: calculated for [M+Na]<sup>+</sup>, C<sub>22</sub>H<sub>37</sub>BO<sub>3</sub>Na: 383.2727, found 383.2735. Compound (*S*)-**2h** was oxidized to (*S*)-**3h** (see general procedure below) to determine the enantiomeric ratio. Compound (*S*)-**3h** was obtained with a 93:7 enantiomeric ratio determined by SFC using Chiralpak-IB column [CO<sub>2</sub>/MeOH (99:1) 3 mL/min]  $\tau_{\text{major}} : 6.8$  min  $\tau_{\text{minor}} : 6.1$  min.  $[\alpha]_{\text{D}}^{20} = +6.2$  ( $c = 1.0$ , CHCl<sub>3</sub>). **mp** = 46-48 °C.

<sup>13</sup> Bacha, J. D.; Matthews, J. S., *US 4032547 A 19770628*, 1977.

**(S)-2,6-Dimethyl-4-[phenyl(4,4,5,5-tetramethyl-1,3,2-dioxaborolan-2-yl)methyl]phenol (2i)**

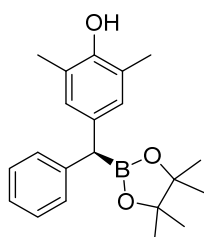

From **1i** (42 mg, 0.2 mmol), following the general procedure described above (rt), compound (*S*)-**2i** (42.8 mg, 0.13 mmol) was obtained in 65% yield after purification by column chromatography (33% Et<sub>2</sub>O/hexanes) as a colorless oil.  $R_f = 0.34$  (33% Et<sub>2</sub>O/hexanes).

**<sup>1</sup>H-NMR** (300 MHz, CDCl<sub>3</sub>):  $\delta$  7.28-7.20 (m, 4H), 7.18-7.08 (m, 1H), 6.83 (s, 2H), 4.45 (s, 1H), 3.72 (s, 1H), 2.18 (s, 6H), 1.22 (s, 12H). **<sup>13</sup>C-NMR** (75 MHz, CDCl<sub>3</sub>):  $\delta$  150.6, 143.1, 133.7, 129.7, 129.2, 128.6, 125.7, 123.2, 84.0, 24.9, 24.8, 16.3. [note: the carbon attached to boron was not observed due to quadrupole broadening caused by the <sup>11</sup>B nucleus]. **HRMS (EI+)**: calculated for [M<sup>+</sup>], C<sub>21</sub>H<sub>27</sub>BO<sub>3</sub>: 338.2053, found 338.2044. Compound (*S*)-**2i** was obtained with a 96:4 enantiomeric ratio determined by SFC using Chiralpak-IB column [CO<sub>2</sub>/MeOH (98:2), 1.0 mL/min]:  $\tau_{\text{major}} = 31.7$  min,  $\tau_{\text{minor}} = 30.4$  min.  $[\alpha]_{\text{D}}^{20} = +13.4$  ( $c = 1.0$ , CHCl<sub>3</sub>).

**(S)-2,6-Dimethyl-4-[(4,4,5,5-tetramethyl-1,3,2-dioxaborolan-2-yl)(*p*-tolyl)methyl]phenol (2j)**

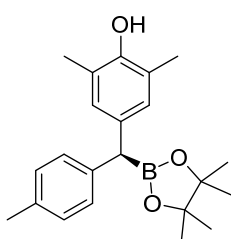

From **1j** (45 mg, 0.2 mmol), following the general procedure described above (rt), compound (*S*)-**2j** (66.8 mg, 0.19 mmol) was obtained in 95% yield after purification by column chromatography (20% Et<sub>2</sub>O/hexanes) as a yellow solid.  $R_f = 0.34$  (20% Et<sub>2</sub>O/hexanes).

**<sup>1</sup>H-NMR** (300 MHz, CDCl<sub>3</sub>):  $\delta$  7.12 (d,  $J = 8.0$  Hz, 2H), 7.05 (d,  $J = 8.0$  Hz, 2H), 6.86 (s, 2H), 4.40 (s, 1H), 3.67 (s, 1H), 2.29 (s, 3H), 2.18, (s, 6H), 1.23 (s, 12H). **<sup>13</sup>C-NMR** (75 MHz, CDCl<sub>3</sub>):  $\delta$  150.2, 139.6, 134.7, 133.6, 129.2, 129.0, 128.7, 122.8, 83.5, 24.6, 24.5, 20.9, 15.9. [note: the carbon attached to boron was not observed due to quadrupole broadening caused by the nucleus]. **HRMS (ESI+, MeOH+NaI)**: calculated for [M+Na]<sup>+</sup>, C<sub>22</sub>H<sub>29</sub>BO<sub>3</sub>Na: 375.2101, found 375.2115. Compound (*S*)-**2j** was obtained with a 95:5 enantiomeric ratio determined by SFC using Chiralpak-IA column [CO<sub>2</sub>/MeOH (98:2), 1.0 mL/min]:  $\tau_{\text{major}} = 42.5$  min,  $\tau_{\text{minor}} = 38.0$  min.  $[\alpha]_{\text{D}}^{20} = +25.0$  ( $c = 1.0$ , CHCl<sub>3</sub>). **mp** = 86-88 °C.

**(S)-[(4-Bromophenyl)(4,4,5,5-tetramethyl-1,3,2-dioxaborolan-2-yl)methyl]-2,6-dimethylphenol (2k)**

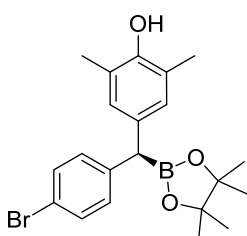

From **1k** (58 mg, 0.2 mmol), following the general procedure described above (rt), compound (*S*)-**2k** (48.0 mg, 0.12 mmol) was obtained in 58% yield after purification by column chromatography (33% Et<sub>2</sub>O/hexanes) as a white solid.  $R_f = 0.28$  (33% Et<sub>2</sub>O/hexanes).

**<sup>1</sup>H-NMR** (300 MHz, CDCl<sub>3</sub>):  $\delta$  7.36 (d,  $J = 8.4$  Hz, 2H), 7.11 (d,  $J = 8.4$  Hz, 2H), 6.84 (s, 2H), 4.54 (s, 1H), 3.67 (s, 1H), 2.19 (s, 6H), 1.24 (s, 6H), 1.23 (s, 6H). **<sup>13</sup>C-NMR** (75 MHz, CDCl<sub>3</sub>):  $\delta$  150.4, 141.9, 132.7, 131.3, 130.6, 129.3, 123.1, 119.2, 83.8, 24.6, 24.5, 15.9. [note: the carbon attached to boron was not observed due to quadrupole broadening caused by the nucleus]. **HRMS (EI+)**: calculated for [M]<sup>+</sup>, C<sub>21</sub>H<sub>26</sub>BO<sub>3</sub>Br: 416.1158, found 416.1157. Compound (*S*)-**2k** was obtained with a 95:5

enantiomeric ratio determined by HPLC using Chiralpak-IA column [Hexane/PrOH (99.5:0.5) 0.5 mL/min]:  $\tau_{\text{major}}$ : 24.1 min,  $\tau_{\text{minor}}$ : 20.7 min.  $[\alpha]_{\text{D}}^{20} = +7.9$  ( $c = 1.0$ ,  $\text{CHCl}_3$ ). **mp** = 70-72 °C.

**(R)-2,6-Dimethyl-4-[(4,4,5,5-tetramethyl-1,3,2-dioxaborolan-2-yl)(*o*-tolyl)methyl]phenol (2l)**

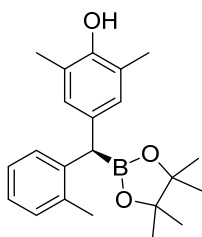

From **1l** (45 mg, 0.2 mmol), following the general procedure described above (0 °C), compound (*R*)-**2l** (44.2 mg, 0.126 mmol) was obtained in 63% yield after purification by column chromatography (20%  $\text{Et}_2\text{O}$ /hexanes) as a white solid.  $R_f = 0.24$  (20%  $\text{Et}_2\text{O}$ /hexanes).

**$^1\text{H-NMR}$**  (300 MHz,  $\text{CDCl}_3$ ):  $\delta$  7.21 (d,  $J = 6.4$  Hz, 1H), 7.15-7.03 (m, 3H), 6.80 (s, 2H), 4.42 (s, 1H), 3.85 (s, 1H), 2.29 (s, 3H), 2.18 (s, 6H), 1.23 (s, 12H).  **$^{13}\text{C-NMR}$**  (75 MHz,  $\text{CDCl}_3$ ):  $\delta$  150.1, 140.8, 136.3, 132.8, 130.2, 129.5, 128.9, 125.9, 125.5, 122.8, 83.6, 24.7, 24.5, 20.13, 16.0 [note: the carbon attached to boron was not observed due to quadrupole broadening caused by the nucleus]. **HRMS (EI+)**: calculated for  $[\text{M}]^+$ ,  $\text{C}_{22}\text{H}_{29}\text{BO}_3$ : 352.2210, found 352.2198. Compound (*S*)-**2l** was oxidized to (*S*)-**3l** (see general procedure below) to determine the enantiomeric ratio. Compound (*S*)-**3l** was obtained with a 95.5:4.5 enantiomeric ratio determined by SFC using Chiralpak-IB column [ $\text{CO}_2/\text{MeOH}$  (95:5) 3.0 mL/min]:  $\tau_{\text{major}}$ : 18.4 min,  $\tau_{\text{minor}}$ : 17.6 min.  $[\alpha]_{\text{D}}^{20} = +20.8$  ( $c = 1.0$ ,  $\text{CHCl}_3$ ). **mp** = 102-104 °C.

**(S)-2,6-Dimethyl-4-[naphthalen-2-yl(4,4,5,5-tetramethyl-1,3,2-dioxaborolan-2-yl)methyl]phenol (2m)**

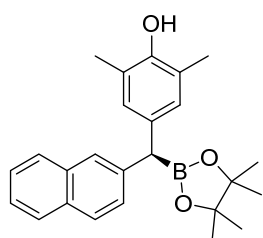

From **1m** (52 mg, 0.2 mmol), following the general procedure described above (rt), compound (*S*)-**2m** (49 mg, 0.13 mmol) was obtained in 63% yield after purification by column chromatography (33%  $\text{Et}_2\text{O}$ /hexanes) as a yellow solid.  $R_f = 0.33$  (33%  $\text{Et}_2\text{O}$ /hexanes).

**$^1\text{H-NMR}$**  (300 MHz,  $\text{CDCl}_3$ ):  $\delta$  7.85-7.70 (m, 3H), 7.64 (s, 1H), 7.50-7.34 (m, 3H), 6.91 (s, 2H), 4.51 (s, 1H), 3.89 (s, 1H), 2.19 (s, 6H), 1.24 (s, 12H).  **$^{13}\text{C-NMR}$**  (75 MHz,  $\text{CDCl}_3$ ):  $\delta$  150.3, 140.3, 133.7, 133.2, 131.8, 129.4, 128.1, 127.7, 127.6, 127.5, 126.8, 125.6, 124.9, 122.9, 83.6, 24.6, 15.9. [note: the carbon attached to boron was not observed due to quadrupole broadening caused by the nucleus]. **HRMS (EI+)**: calculated for  $[\text{M}]^+$ ,  $\text{C}_{25}\text{H}_{29}\text{BO}_3$ : 388.2210, found 388.2220. Compound (*S*)-**2m** was obtained with a 96:4 enantiomeric ratio determined by SFC using Chiralpak-IA column [ $\text{CO}_2/\text{MeOH}$  (95:5) 3.0 mL/min]:  $\tau_{\text{major}}$ : 11.2 min,  $\tau_{\text{minor}}$ : 10.4 min.  $[\alpha]_{\text{D}}^{20} = +13.4$  ( $c = 1.0$ ,  $\text{CHCl}_3$ ). **mp** = 49-51 °C.

**(S)-2,6-Diisopropyl-4-[phenyl(4,4,5,5-tetramethyl-1,3,2-dioxaborolan-2-yl)methyl]phenol (2n)**

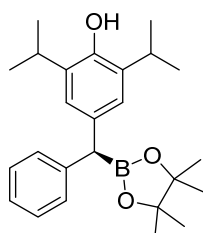

From **1n** (53 mg, 0.2 mmol), following the general procedure described above (0 °C), compound (*S*)-**2n** (56.1 mg, 0.14 mmol) was obtained in 71% yield after purification by column chromatography (20% Et<sub>2</sub>O/hexanes) as a yellow oil. *R<sub>f</sub>* = 0.55 (20 % Et<sub>2</sub>O/hexanes).

<sup>1</sup>H-NMR (300 MHz, CDCl<sub>3</sub>): δ 7.33-7.19 (m, 4H), 7.13 (t, *J* = 6.8 Hz, 1H), 6.96 (s, 2H), 4.65 (s, 1H), 3.79 (s, 1H), 3.19-3.04 (m, 2H), 1.28-1.19 (m, 24H). <sup>13</sup>C-NMR (75 MHz, CDCl<sub>3</sub>): δ 148.0, 143.0, 133.4, 133.1, 128.7, 128.2, 125.2, 124.5, 83.5, 27.2, 24.7, 24.5, 22.8, 22.7 [note: the carbon attached to boron was not observed due to quadrupole broadening caused by the nucleus]. HRMS (EI<sup>+</sup>): calculated for [M]<sup>+</sup>, C<sub>25</sub>H<sub>35</sub>BO<sub>3</sub>: 394.2679, found 394.2673. Compound (*S*)-**2n** was oxidized to (*S*)-**3n** (see general procedure below) to determine the enantiomeric ratio. Compound (*S*)-**3n** was obtained with a 95:5 enantiomeric ratio determined by HPLC using Chiralpak-IA column [Hexane/*i*PrOH (95:5) 1 mL/min]: τ<sub>major</sub>: 15.8 min, τ<sub>minor</sub>: 13.5 min. [α]<sub>D</sub><sup>20</sup> = +16.7 (*c* = 1.0, CHCl<sub>3</sub>).

**(S)-2-(*tert*-Butyl)-6-methyl-4-[phenyl(4,4,5,5-tetramethyl-1,3,2-dioxaborolan-2-yl)methyl]phenol (2o)**

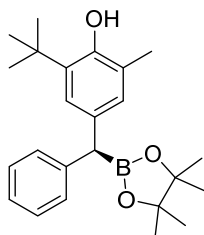

From **1o** (51 mg, 0.2 mmol), following the general procedure described above (rt), compound (*S*)-**2o** (49.6 mg, 0.14 mmol) was obtained in 71% yield after purification by column chromatography (14% Et<sub>2</sub>O/hexanes) as a yellow oil. *R<sub>f</sub>* = 0.44 (14 % Et<sub>2</sub>O/hexanes).

<sup>1</sup>H-NMR (300 MHz, CDCl<sub>3</sub>): δ 7.31-7.22 (m, 4H), 7.20-7.15 (m, 1H), 7.13 (s, 1H), 6.85 (s, 1H), 4.61 (s, 1H), 3.78 (s, 1H), 2.19 (s, 3H), 1.42 (s, 9H), 1.26 (s, 6H), 1.25 (s, 6H). <sup>13</sup>C-NMR (75 MHz, CDCl<sub>3</sub>): δ 150.1, 142.8, 135.3, 132.8, 129.2, 128.8, 128.2, 126.1, 125.3, 122.9, 83.5, 34.5, 29.8, 24.6, 24.5, 16.0 [note: the carbon attached to boron was not observed due to quadrupole broadening caused by the nucleus]. HRMS (ESI<sup>+</sup>, MeOH+NaI): calculated for [M+Na]<sup>+</sup>, C<sub>24</sub>H<sub>33</sub>BO<sub>3</sub>Na: 403.2414, found 403.2410. Compound (*S*)-**2o** was obtained with a 93:7 enantiomeric ratio determined by HPLC using Chiralpak-IA column [Hexane/*i*PrOH (99.5:0.5) 1 mL/min]: τ<sub>major</sub>: 7.6 min, τ<sub>minor</sub>: 6.6 min. [α]<sub>D</sub><sup>20</sup> = +10.9 (*c* = 1.0, CHCl<sub>3</sub>).

**(S)-4-[(4-Bromophenyl)(4,4,5,5-tetramethyl-1,3,2-dioxaborolan-2-yl)methyl]-2-(*tert*-butyl)-6-methylphenol (2p)**

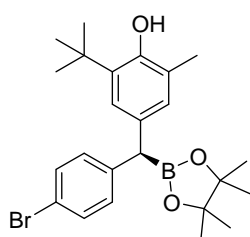

From **1p** (66 mg, 0.2 mmol), following the general procedure described above (rt), compound (*S*)-**2p** (49.5 mg, 0.108 mmol) was obtained in 54% yield after purification by column chromatography (20% Et<sub>2</sub>O/hexanes) as a white solid. *R<sub>f</sub>* = 0.36 (20% Et<sub>2</sub>O/hexanes).

<sup>1</sup>H-NMR (300 MHz, CDCl<sub>3</sub>): δ 7.35 (d, *J* = 8.4 Hz, 2H), 7.09 (d, *J* = 8.4 Hz, 2H), 7.06 (s, 1H), 6.78 (s, 1H), 4.79 (s, 1H), 3.68 (s, 1H), 2.17 (s, 3H), 1.37 (s, 9H), 1.25 (s, 6H), 1.24 (s, 6H). <sup>13</sup>C-NMR (75 MHz, CDCl<sub>3</sub>): δ 150.8, 142.0, 135.5,



132.2, 131.3, 130.6, 129.1, 126.0, 123.1, 119.1, 83.7, 34.5, 29.8, 24.6, 24.5, 16.0 [note: the carbon attached to boron was not observed due to quadrupole broadening caused by the nucleus]. **HRMS (EI+)**: calculated for  $[M]^+$ ,  $C_{24}H_{32}BO_3Br$ : 458.1628, found 458.1629. Compound (*S*)-**2p** was oxidized to (*S*)-**3p** (see general procedure below) to determine the enantiomeric ratio. Compound (*S*)-**3p** was obtained with a 91:9 enantiomeric ratio determined by HPLC using Chiralpak-IC column [Hexane/*i*PrOH (98:2) 1 mL/min]:  $\tau_{\text{major}}$  : 9.3 min,  $\tau_{\text{minor}}$  : 7.6 min.  $[\alpha]_D^{20} = +15.38$  (c= 1.0,  $CHCl_3$ ). **mp** = 123-125 °C.

## 5. Functionalization of the C-B bond

### 5.1. General Procedure for the synthesis of chiral benzylic alcohols 3a-3p

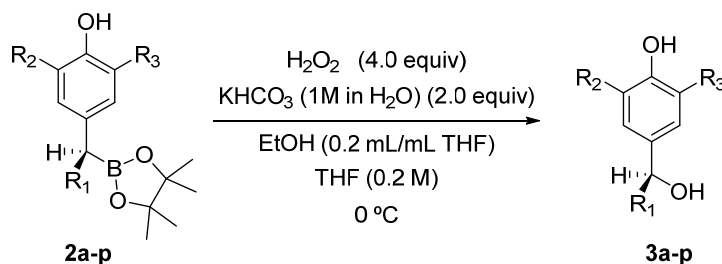

A round bottom flask was charged with benzylic boronate **2** (0.1 mmol), a magnetic stir bar and 0.5 mL of THF and was cooled to 0 °C. Then, EtOH (0.1 mL), potassium bicarbonate solution (1M in H<sub>2</sub>O, 0.2 mL) and H<sub>2</sub>O<sub>2</sub> (30%, 41 μL) were added. The reaction mixture was stirred for 1 hour at 0 °C. The reaction was checked by TLC until completion. Ethyl acetate and water were added and the layers were separated. The aqueous phase was extracted with ethyl acetate (x3) and the combined organic layers were dried over Na<sub>2</sub>SO<sub>4</sub>, filtered and concentrated. The crude product was purified by flash-column chromatography (eluent indicated in each case).

#### (*S*)-2,6-di-*tert*-Butyl-4-[hydroxy(phenyl)methyl]phenol (**3a**)

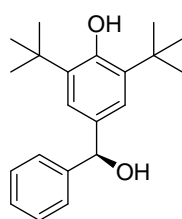

From **2a** (58 mg, 0.14 mmol), following the general procedure described above, compound (*S*)-**3a** (35 mg, 0.11 mmol) was obtained in 81% yield after purification by column chromatography (10% ethyl acetate/cyclohexane) as a white solid.  $R_f = 0.27$  (10% ethyl acetate/hexanes).

<sup>1</sup>H-NMR (300 MHz, CDCl<sub>3</sub>): δ 7.45-7.31 (m, 4H), 7.30-7.23 (m, 1H), 7.17 (s, 2H), 5.78 (s, 1H), 5.18 (s, 1H), 1.41 (s, 18H). <sup>13</sup>C-NMR (75 MHz, CDCl<sub>3</sub>): δ 153.3, 144.1, 135.9, 134.6, 128.3, 127.2, 126.4, 123.6, 76.7, 34.4, 30.2. HRMS (EI+): calculated for [M-H<sub>2</sub>O]<sup>+</sup>, C<sub>21</sub>H<sub>26</sub>O: 294.1984, found 294.1986. Compound (*S*)-**3a** was obtained with a 96:4 enantiomeric ratio determined by HPLC using Chiralpak-IA column [Hexane/*i*PrOH (98:2), 1.0 mL/min]:  $\tau_{\text{major}} = 9.0$  min,  $\tau_{\text{minor}} = 7.9$  min.  $[\alpha]_D^{20} = -18.33$  ( $c = 0.67$ , CHCl<sub>3</sub>). mp = 82-84 °C.

#### (*S*)-2,6-di-*tert*-Butyl-4-[hydroxy(naphthalen-2-yl)methyl]phenol (**3b**)

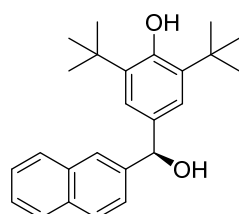

From **2b** (58 mg, 0.12 mmol), following the general procedure described above, compound (*S*)-**3b** (21.8 mg, 0.06 mmol) was obtained in 50% yield after purification by column chromatography (20% ethyl acetate/cyclohexane) as a white solid.  $R_f = 0.28$  (10% EtOAc/hexanes).

<sup>1</sup>H-NMR (300 MHz, CDCl<sub>3</sub>): δ 7.92 (s, 1H), 7.89-7.74 (m, 3H), 7.56-7.38 (m, 3H), 7.22 (s, 2H), 5.93 (s, 1H), 5.19 (s, 1H), 2.37 (bs, 1H), 1.41 (s, 18H). <sup>13</sup>C-NMR (75 MHz, CDCl<sub>3</sub>): δ 153.4, 141.5, 136.0, 134.4, 133.3, 132.8, 128.1, 128.0, 127.6, 126.0, 125.7, 124.9, 124.7, 123.8, 76.8, 34.4, 30.2. HRMS (EI+): calculated for [M-H<sub>2</sub>O]<sup>+</sup>, C<sub>25</sub>H<sub>28</sub>O: 344.2140, found 344.2142. Compound (*S*)-**3b** was obtained with a 96:4 enantiomeric ratio

determined by SFC using Chiralpak-IB column [CO<sub>2</sub>/MeOH (95:5, 3.0 mL/min)]:  $\tau_{\text{major}} = 16.5$  min,  $\tau_{\text{minor}} = 15.2$  min.  $[\alpha]_{\text{D}}^{20} = -20.9$  ( $c = 1.0$ , CHCl<sub>3</sub>). **mp** = 153-155 °C.

#### (*S*)-2,6-di-*tert*-Butyl-4-[hydroxy(4-methoxyphenyl)methyl]phenol (**3c**)

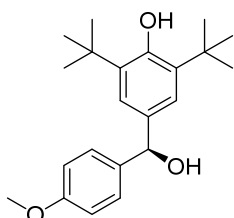

From **2c** (28 mg, 0.06 mmol), following the general procedure described above, compound (*S*)-**3c** (15 mg, 0.044 mmol) was obtained in 73% yield after purification by column chromatography (20% EtOAc/cyclohexane) as a yellow solid.  $R_f = 0.50$  (20% EtOAc/hexanes).

**<sup>1</sup>H-NMR** (300 MHz, CDCl<sub>3</sub>):  $\delta$  7.31 (d,  $J = 8.6$  Hz, 2H), 7.16 (s, 2H), 6.88 (d,  $J = 8.6$  Hz, 2H), 5.74 (s, 1H), 5.16 (s, 1H), 3.80 (s, 3H), 2.05 (bs, 1H), 1.41 (s, 18H). **<sup>13</sup>C-NMR** (75 MHz, CDCl<sub>3</sub>):  $\delta$  158.8, 153.2, 136.5, 135.8, 134.7, 127.7, 123.5, 113.7, 76.3, 55.3, 34.4, 30.3. **HRMS (EI<sup>+</sup>)**: calculated for  $[\text{M}-\text{H}_2\text{O}]^+$ , C<sub>22</sub>H<sub>28</sub>O<sub>2</sub>: 324.2089, found 324.2089. Compound (*S*)-**3c** was obtained with a 93:7 enantiomeric ratio determined by HPLC using Chiralpak-IA column [Hexane/<sup>*i*</sup>PrOH (99.5:0.5, 1.0 mL/min)]:  $\tau_{\text{major}} = 35.9$  min,  $\tau_{\text{minor}} = 32.9$  min.  $[\alpha]_{\text{D}}^{20} = -15.9$  ( $c = 1.0$ , CHCl<sub>3</sub>). **mp** = 105-107 °C.

#### (*S*)-2,6-di-*tert*-Butyl-4-[hydroxy(*p*-tolyl)methyl]phenol (**3d**)

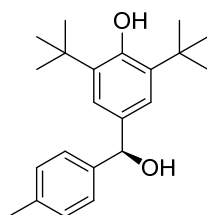

From **2d** (26 mg, 0.06 mmol), following the general procedure described above, compound (*S*)-**3d** (16.8 mg, 0.051 mmol) was obtained in 86% yield after purification by column chromatography (30% EtOAc/cyclohexane) as a yellow oil.  $R_f = 0.50$  (31% EtOAc/hexanes).

**<sup>1</sup>H-NMR** (300 MHz, CDCl<sub>3</sub>):  $\delta$  7.29 (d,  $J = 8.0$  Hz, 2H), 7.17 (s, 2H), 7.15 (d,  $J = 8.0$  Hz, 2H), 5.74 (s, 1H), 5.16 (s, 1H), 2.34 (s, 3H), 2.07 (bs, 1H), 1.41 (s, 18H). **<sup>13</sup>C-NMR** (75 MHz, CDCl<sub>3</sub>):  $\delta$  153.2, 141.3, 136.8, 135.8, 134.7, 129.0, 126.3, 123.5, 76.6, 34.4, 30.2, 21.1. **HRMS (EI<sup>+</sup>)**: calculated for  $[\text{M}-\text{H}_2\text{O}]^+$ , C<sub>22</sub>H<sub>28</sub>O: 308.2140, found 308.2133. (*S*)-**3d** was obtained with a 93:7 enantiomeric ratio determined by SFC using Chiralpak-IA column [CO<sub>2</sub>/MeOH (95:5) 3.0 mL/min]:  $\tau_{\text{major}} = 5.9$  min,  $\tau_{\text{minor}} = 5.4$  min.  $[\alpha]_{\text{D}}^{20} = -10.1$  ( $c = 1.0$ , CHCl<sub>3</sub>).

#### (*S*)-2,6-di-*tert*-Butyl-4-[hydroxyl[3-(trifluoromethyl)phenyl]methyl]phenol (**3e**)

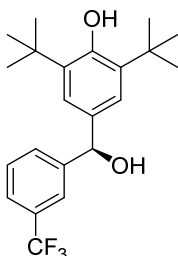

From **2e** (20 mg, 0.04 mmol), following the general procedure described above, compound (*S*)-**3e** (11.9 mg, 0.031 mmol) was obtained in 78% yield after purification by column chromatography (20% EtOAc/cyclohexane) as a yellow oil.  $R_f = 0.31$  (17% EtOAc/hexanes).

**<sup>1</sup>H-NMR** (300 MHz, CDCl<sub>3</sub>):  $\delta$  7.73 (s, 1H), 7.59-7.41 (m, 3H), 7.13 (s, 2H), 5.80 (s, 1H), 5.23 (s, 1H), 2.19 (bs, 1H), 1.41 (s, 18H). **<sup>13</sup>C-NMR** (75 MHz, CDCl<sub>3</sub>):  $\delta$  153.7, 144.9, 136.2, 133.9, 130.6 (q,  $J_{\text{C-F}} = 32.1$  Hz), 129.7, 128.7, 124.2 (q,  $J_{\text{C-F}} = 271.8$  Hz), 124.0 (q,  $J_{\text{C-F}} = 3.8$  Hz), 123.7, 123.1 (q,  $J_{\text{C-F}} = 3.8$  Hz), 76.2, 34.4, 30.2. **<sup>19</sup>F-NMR** (282 MHz, CDCl<sub>3</sub>):  $\delta$  -62.6. **HRMS (EI<sup>+</sup>)**: calculated for  $[\text{M}-\text{H}_2\text{O}]^+$ , C<sub>22</sub>H<sub>25</sub>OF<sub>3</sub>: 362.1858, found 362.1849. Compound (*S*)-**3e** was obtained with a 94:6

enantiomeric ratio determined by SFC using Chiralpak-IB column [CO<sub>2</sub>/MeOH (98:2) 1.0 mL/min]:  $\tau_{\text{major}}$ : 19.0 min,  $\tau_{\text{minor}}$ : 17.9 min.  $[\alpha]_{\text{D}}^{20} = -10.5$  ( $c = 1.0$ , CHCl<sub>3</sub>).

#### (*S*)-4-[(4-Bromophenyl)(hydroxy)methyl]-2,6-di-*tert*-butylphenol (**3f**)

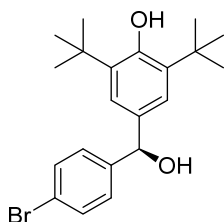

From **2f** (50 mg, 0.1 mmol), following the general procedure described above, compound (*S*)-**3f** (31 mg, 0.08 mmol) was obtained in 79% yield after purification by column chromatography (20% EtOAc/cyclohexane) as a white solid.  $R_f = 0.28$  (10% EtOAc/ hexanes).

<sup>1</sup>H-NMR (300 MHz, CDCl<sub>3</sub>):  $\delta$  7.46 (d,  $J = 8.4$  Hz, 2H), 7.29 (d,  $J = 8.4$  Hz, 2H), 7.13 (s, 2H), 5.73 (s, 1H), 5.21 (s, 1H), 2.13 (s, 1H), 1.42 (s, 18H). <sup>13</sup>C-NMR (75 MHz, CDCl<sub>3</sub>):  $\delta$  153.4, 143.1, 136.0, 134.1, 131.3, 128.1, 123.5, 120.1, 76.1, 34.3, 30.2. HRMS (EI<sup>+</sup>): calculated for [M]<sup>+</sup>, C<sub>21</sub>H<sub>27</sub>O<sub>2</sub>Br: 390.1194, found 390.1206. Compound (*S*)-**3f** was obtained with a 96:4 enantiomeric ratio determined by SFC using Chiralpak-IA column [CO<sub>2</sub>/MeOH (95:5, 3.0 mL/min):  $\tau_{\text{major}} = 7.4$  min,  $\tau_{\text{minor}} = 6.7$  min.  $[\alpha]_{\text{D}}^{20} = -23.4$  ( $c = 1.0$ , CHCl<sub>3</sub>). mp = 134-136 °C.

#### (*R*)-4-[(2-Bromophenyl)(hydroxy)methyl]-2,6-di-*tert*-butylphenol (**3g**)

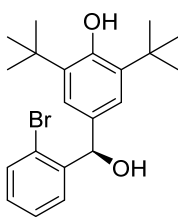

From **2g** (69 mg, 0.14 mmol), following the general procedure described above, compound (*R*)-**3g** (28.3 mg, 0,072 mmol) was obtained in 52% yield after purification by column chromatography (25% EtOAc/cyclohexane) as a yellow oil.  $R_f = 0.52$  (25% EtOAc/hexanes).

<sup>1</sup>H NMR (300 MHz, CDCl<sub>3</sub>):  $\delta$  7.67 (d,  $J = 7.8$ , 1.6 Hz, 1H), 7.53 (d,  $J = 8.0$ , 1.1 Hz, 1H), 7.36 (t,  $J = 8.0$ , 1H), 7.24 (s, 2H), 7.13 (t,  $J = 7.8$ , 1H), 6.12 (s, 1H), 5.18 (s, 1H), 2.29 (bs, 1H), 1.42 (s, 18H). <sup>13</sup>C NMR (75 MHz, CDCl<sub>3</sub>):  $\delta$  153.4, 143.1, 135.8, 132.8, 132.7, 128.7, 128.0, 127.6, 123.9, 122.7, 75.2, 34.4, 30.2. HRMS (EI<sup>+</sup>): calculated for [M]<sup>+</sup>, C<sub>21</sub>H<sub>27</sub>O<sub>2</sub>Br: 390.1194, found 390.1190. Compound (*R*)-**3g** was obtained with a 96:4 enantiomeric ratio determined by SFC using Chiralpak-IB column [CO<sub>2</sub>/MeOH (97:3) 3.0 mL/min]  $\tau_{\text{major}}$ : 9.8 min,  $\tau_{\text{minor}}$ : 9.2 min.  $[\alpha]_{\text{D}}^{20} = +11.6$  ( $c = 1.0$ , CHCl<sub>3</sub>).

#### (*S*)-2,6-di-*tert*-Butyl-4-(1-hydroxyethyl)phenol (**3h**)

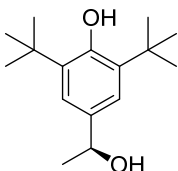

From **2h** (30 mg, 0.08 mmol), following the general procedure described above, compound (*S*)-**3h** (12.3 mg, 0,048 mmol) was obtained in 61% yield after purification by column chromatography (20% EtOAc/cyclohexane) as a white solid.  $R_f = 0.14$  (11% Et<sub>2</sub>O/hexanes).

<sup>1</sup>H NMR (300 MHz, CDCl<sub>3</sub>):  $\delta$  7.19 (s, 2H), 5.18 (s, 1H), 4.83 (q,  $J = 6.4$  Hz, 1H), 1.70 (bs, 1H), 1.50 (d,  $J = 6.4$  Hz, 3H), 1.46 (s, 18H). <sup>13</sup>C NMR (75 MHz, CDCl<sub>3</sub>):  $\delta$  153.2, 136.3, 135.9, 122.3, 70.9, 34.4, 30.3, 24.9. HRMS (EI<sup>+</sup>): calculated for [M-H<sub>2</sub>O]<sup>+</sup>, C<sub>16</sub>H<sub>24</sub>O: 232.1827, found 232.1822. Compound (*S*)-**3h**, obtained with a 93:7 enantiomeric ratio determined by SFC using Chiralpak-IB column [CO<sub>2</sub>/MeOH (99:1) 3 mL/min]:  $\tau_{\text{major}}$ : 6.8 min,  $\tau_{\text{minor}}$ : 6.1 min.  $[\alpha]_{\text{D}}^{20} = -14.1$  ( $c = 1.0$ , CHCl<sub>3</sub>). mp = 98-100 °C.

#### (*R*)-4-(Hydroxy(*o*-tolyl)methyl)-2,6-dimethylphenol (**3l**)

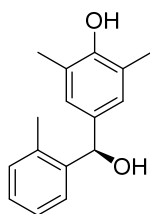

From **2l** (24 mg, 0.07 mmol), following the general procedure described above, compound (*R*)-**3l** (12 mg, 0.05 mmol) was obtained in 71% yield after purification by column chromatography (20% ethyl acetate/cyclohexane) as a white solid.  $R_f = 0.11$  (17% Et<sub>2</sub>O/hexanes).

<sup>1</sup>H NMR (300 MHz, CDCl<sub>3</sub>): δ 7.59 (d,  $J = 7.7$  Hz, 1H), 7.31-7.24 (m, 1H), 7.24-7.18 (m, 1H), 7.14 (t,  $J = 8.6$  Hz, 1H), 6.91 (s, 2H), 5.88 (s, 1H), 4.60 (s, 1H), 2.22 (3H), 2.20 (s, 6H), 2.01 (s, 1H). <sup>13</sup>C NMR (75 MHz, CDCl<sub>3</sub>): δ 151.7, 141.6, 135.1, 134.5, 130.4, 127.5, 127.2, 126.0, 125.8, 123.0, 73.0, 19.4, 15.9. HRMS (EI<sup>+</sup>): calculated for [M-H<sub>2</sub>O]<sup>+</sup>, C<sub>16</sub>H<sub>16</sub>O: 224.1201, found 224.1206. Compound (*R*)-**3l** was obtained with a 95.5:4.5 enantiomeric ratio determined by SFC using Chiralpak-IB column [CO<sub>2</sub>/MeOH (95:5) 3.0 mL/min]:  $\tau_{\text{major}}$ : 18.4 min,  $\tau_{\text{minor}}$ : 17.6 min.  $[\alpha]_D^{20} = +2.7$  ( $c = 0.7$ , CHCl<sub>3</sub>). mp = 135-137 °C.

#### (*S*)-4-[Hydroxy(phenyl)methyl]-2,6-diisopropylphenol (**3n**)

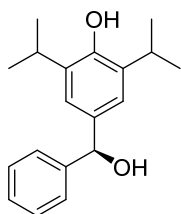

From **2n** (34 mg, 0.084 mmol), following the general procedure described above, compound (*S*)-**3n** (19.5 mg, 0.068 mmol) was obtained in 82% yield after purification by column chromatography (20% EtOAc/cyclohexane) as an orange oil.  $R_f = 0.22$  (20% Et<sub>2</sub>O/hexanes).

<sup>1</sup>H NMR (300 MHz, CDCl<sub>3</sub>): δ 7.42-7.19 (m, 5H), 7.04 (s, 2H), 5.77 (s, 1H), 4.83 (s, 1H), 3.11 (sept,  $J = 6.9$  Hz, 2H), 2.25 (bs, 1H), 1.22 (d,  $J = 6.8$  Hz, 12H). <sup>13</sup>C NMR (75 MHz, CDCl<sub>3</sub>): δ 149.6, 144.2, 135.9, 133.8, 128.4, 127.3, 126.5, 122.1, 76.5, 27.4, 22.7. HRMS (EI<sup>+</sup>): calculated for [M-H<sub>2</sub>O]<sup>+</sup>, C<sub>19</sub>H<sub>22</sub>O: 266.1671, found 266.1675. Compound (*S*)-**3n** was obtained with a 95:5 enantiomeric ratio determined by HPLC using Chiralpak-IA column [Hexane/<sup>i</sup>PrOH (95:5) 1 mL/min]:  $\tau_{\text{major}}$ : 15.8 min,  $\tau_{\text{minor}}$ : 13.5 min.  $[\alpha]_D^{20} = -12.2$  ( $c = 1.0$ , CHCl<sub>3</sub>).

#### (*S*)-4-[(4-bromophenyl)(hydroxy)methyl]-2-(*tert*-butyl)-6-methylphenol (**3p**)

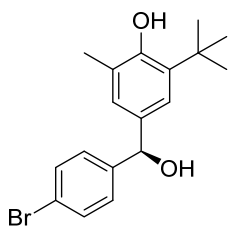

From **2p** (37 mg, 0.08 mmol), following the general procedure described above, compound (*S*)-**3p** (17 mg, 0.049 mmol) was obtained in 61% yield after purification by column chromatography (20% ethyl acetate/hexanes) as a yellow oil.  $R_f = 0.20$  (20% EtOAc/hexanes).

<sup>1</sup>H NMR (300 MHz, CDCl<sub>3</sub>): δ 7.45 (d,  $J = 8.4$  Hz, 2H), 7.27 (d,  $J = 8.4$  Hz, 2H), 7.13 (s, 1H), 6.91 (s, 1H), 5.70 (s, 1H), 4.78 (s, 1H), 2.20 (s, 3H), 2.12 (bs, 1H), 1.39 (s, 9H). <sup>13</sup>C NMR (75 MHz, CDCl<sub>3</sub>): δ 152.4, 143.1, 135.8, 134.8, 131.4, 128.0, 126.8, 123.8, 123.3, 121.1, 75.7, 34.6, 29.7, 16.0. HRMS (EI<sup>+</sup>): calculated for [M-H<sub>2</sub>O]<sup>+</sup>, C<sub>18</sub>H<sub>19</sub>OBr: 330.0619, found 330.0615. Compound (*S*)-**3p**, was obtained with a 91:9 enantiomeric ratio determined by HPLC using Chiralpak-IC column [Hexane/<sup>i</sup>PrOH (98:2) 1 mL/min]:  $\tau_{\text{major}}$ : 9.3 min,  $\tau_{\text{minor}}$ : 7.6 min.  $[\alpha]_D^{20} = -14.4$  ( $c = 1.0$ , CHCl<sub>3</sub>).

## 5.2. Synthesis of the diarylfurymethane 6

### 5.2.1 (*S*)-*tert*-Butyl (2,6-dimethyl-4-(phenyl(4,4,5,5-tetramethyl-1,3,2-dioxaborolan-2-yl)methyl)phenyl) carbonate (4)

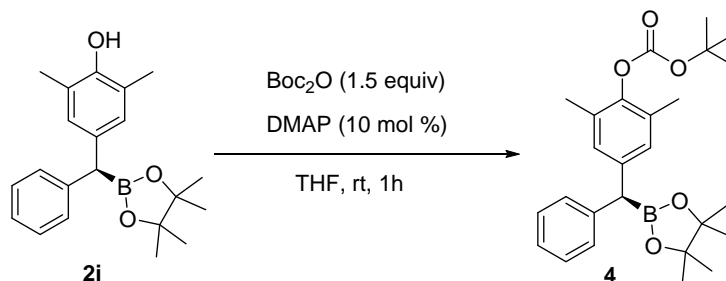

To a solution of boronate **2i** (580 mg, 1.7 mmol, 1.0 equiv) in THF (10 mL) was added  $\text{Boc}_2\text{O}$  (558 mg, 2.56 mmol, 1.5 equiv) followed by DMAP (21 mg, 0.1 mmol, 0.1 equiv). The resulting mixture was stirred at room temperature for 1 h. After this time, water (10 mL) and  $\text{Et}_2\text{O}$  (10 mL) were added. The organic layer was separated and the aqueous layers were extracted with  $\text{Et}_2\text{O}$  (2x 10 mL). The combined organic layers were dried over  $\text{MgSO}_4$ , filtered and concentrated. Purification by flash column chromatography (25%  $\text{Et}_2\text{O}$ /pentane), gave product **4** in 81% yield as a white solid.  $R_f = 0.44$  (20%  $\text{Et}_2\text{O}$ /hexanes).

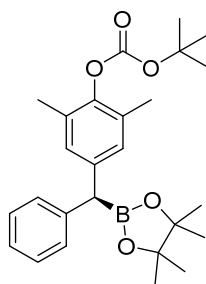

$^1\text{H-NMR}$  (300 MHz,  $\text{CDCl}_3$ ):  $\delta$  7.32-7.23 (m, 4H), 7.21-7.13 (m, 1H), 6.96 (s, 2H), 3.78 (s, 1H), 2.17 (s, 6H), 1.57 (s, 9H), 1.25 (s, 12H).  $^{13}\text{C-NMR}$  (75 MHz,  $\text{CDCl}_3$ ):  $\delta$  151.5, 146.5, 142.1, 139.2, 129.9, 129.3, 129.1, 128.3, 125.5, 83.7, 82.8, 27.6, 24.6, 16.2. [note: the carbon attached to boron was not observed due to quadrupole broadening caused by the  $^{11}\text{B}$  nucleus]. **HRMS (EI+)**: calculated for  $[\text{M}^+]$ ,  $\text{C}_{21}\text{H}_{27}\text{BO}_3$ : 338.2053, found 338.2044.  $[\alpha]_{\text{D}}^{20} = +6.8$  ( $c = 1.0$ ,  $\text{CHCl}_3$ ). **mp** = 70-72 °C.

### 5.2.2. Procedure for C(sp<sup>3</sup>)-C(sp<sup>2</sup>) coupling of boronic ester **4** with furan<sup>14</sup>

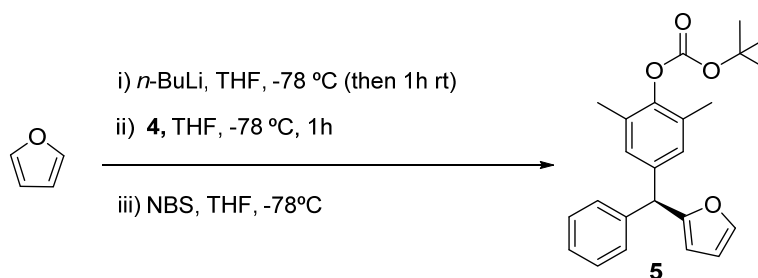

A solution of furan (10  $\mu$ L, 0.134 mmol, 1.0 equiv) in THF (0.3M) was cooled to -78 °C and treated with *n*-BuLi (2.5M in hexanes, 57  $\mu$ L, 0.134 mmol, 1.0 equiv). The cooling bath was removed and the mixture was stirred at room temperature for 1 h. The mixture was cooled to -78 °C and a solution of **4** (76 mg, 0.17 mmol, 1.3 equiv) in THF (0.5M) was added. The mixture was stirred at -78 °C for 1 h. A solution of NBS (29 mg, 0.16 mmol, 1.2 equiv.) in THF (0.3M) was added dropwise. After 1 h at -78 °C, a saturated solution of Na<sub>2</sub>S<sub>2</sub>O<sub>3</sub> was added and the reaction was allowed to warm to room temperature. Then Et<sub>2</sub>O and water were added. The layers were separated and the aqueous layer was extracted with Et<sub>2</sub>O. The combined organic layers were dried (MgSO<sub>4</sub>), filtered and concentrated under reduced pressure. Purification by flash column chromatography (5% Et<sub>2</sub>O/hexanes) gave product **5** in 75% yield as a colorless oil.  $R_f$  = 0.31 (5% Et<sub>2</sub>O/hexanes).

#### (*S*)-*tert*-Butyl-[4-(furan-2-yl(phenyl)methyl)-2,6-dimethylphenyl] carbonate (**5**)

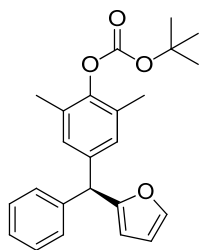

<sup>1</sup>H-NMR (300 MHz, CDCl<sub>3</sub>):  $\delta$  7.37 (s, 1H), 7.33-7.22 (m, 3H), 7.18-7.14 (m, 2H), 6.84 (s, 2H), 6.31 (m, 1H), 5.91 (m, 1H), 5.36 (s, 1H), 2.15 (s, 6H), 1.55 (s, 9H). <sup>13</sup>C-NMR (75 MHz, CDCl<sub>3</sub>):  $\delta$  156.7, 151.4, 147.2, 141.9, 141.7, 139.0, 130.2, 128.9, 128.7, 128.4, 126.7, 110.1, 108.2, 83.1, 50.3, 27.6, 16.2. HRMS (EI<sup>+</sup>): calculated for [M<sup>+</sup>], C<sub>24</sub>H<sub>27</sub>O<sub>4</sub>: 379.1913, found 379.1909.  $[\alpha]_D^{20}$  = +13.8 (*c* = 1.0, CHCl<sub>3</sub>).

<sup>14</sup> Bonet, A.; Odachowski, M.; Leonori, D.; Essafi, S.; Aggarwal, V. K. *Nat. Chem.*, **2014**, *6*, 584-589.

### 5.2.3 Procedure for Boc-deprotection of compound 5.

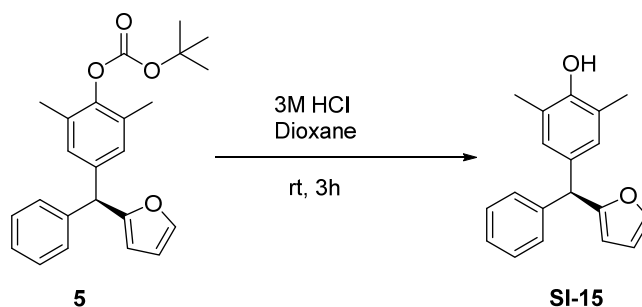

A round bottom flask was charged with **5** (38 mg, 0.1 mmol) and a solution 3M HCl in dioxane (2mL) was added. The reaction was stirred at room temperature for 3 h, after this time it was concentrated under reduced pressure. The reaction mixture was diluted with Et<sub>2</sub>O and water. The layers were separated and the aqueous layers were extracted with Et<sub>2</sub>O (2x10mL). The combined organic layers were dried (MgSO<sub>4</sub>), filtered and concentrated under reduced pressure. Purification by column chromatography on silica gel (25% Et<sub>2</sub>O/pentane) to give product **SI-15** in 90% yield as a colorless oil.  $R_f = 0.48$  (25% Et<sub>2</sub>O/pentane).

#### (S)-4-[Furan-2-yl(phenyl)methyl]-2,6-dimethylphenol (SI-15)

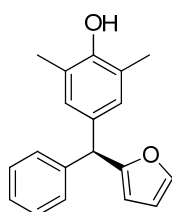

**<sup>1</sup>H-NMR** (300 MHz, CDCl<sub>3</sub>):  $\delta$  7.37 (s, 1H), 7.32-7.22 (m, 3H), 7.20-7.14 (m, 2H), 6.79 (s, 2H), 6.30 (d,  $J = 3.1$ , 1H), 5.90 (d,  $J = 3.1$  Hz, 1H), 5.32 (s, 1H), 4.52 (s, 1H), 2.20 (s, 6H). **<sup>13</sup>C-NMR** (75 MHz, CDCl<sub>3</sub>):  $\delta$  157.3, 151.0, 142.3, 141.8, 133.4, 128.9, 128.7, 128.4, 126.6, 122.9, 110.0, 108.0, 50.2, 16.0.

**HRMS (EI+)**: calculated for [M<sup>+</sup>], C<sub>19</sub>H<sub>18</sub>O<sub>2</sub>: 278.1307, found 278.1303. Compound (*S*)-**SI-15** was obtained with a 92:8 enantiomeric ratio determined by SFC using Chiralpak-IB column [CO<sub>2</sub>/MeOH (98:2), 2.0 mL/min]:  $\tau_{\text{major}} =$

23.5 min,  $\tau_{\text{minor}} = 22.7$  min.  $[\alpha]_{\text{D}}^{20} = +21.9$  ( $c = 1.0$ , CHCl<sub>3</sub>).



### 5.3. Procedure for the synthesis of 1,2-diarylethane **7**

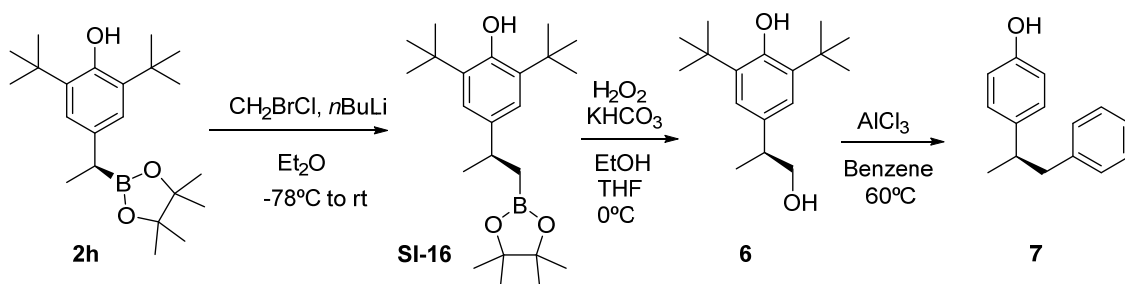

#### 5.3.1. Synthesis of (*R*)-2,6-di-*tert*-Butyl-4-[1-(4,4,5,5-tetramethyl-1,3,2-dioxaborolan-2-yl)propan-2-yl]phenol (**SI-16**)

In an oven dried flask, benzylic boronate **2h** (72 mg, 0.2 mmol) and a magnetic stir bar were charged. Then, the flask was purged three times with vacuum/Ar cycles. Anhydrous diethyl ether (0.8 mL, 0.25M) was added and the reaction mixture was cooled to  $-78^\circ\text{C}$ . Then  $n\text{-BuLi}$  (1.6M in hexanes, 2.5 equiv) was added dropwise to the reaction mixture. The mixture was stirred for 20 min at  $-78^\circ\text{C}$ , and then it was warmed to room temperature and stirred for additional 4 h. The reaction mixture was filtered through a thin layer of silica gel. Solvent was removed and the crude mixture was purified by flash chromatography to give **SI-16** (58 mg, 0.154 mmol) in 77% yield as a colorless oil.  $R_f = 0.62$  (17%  $\text{Et}_2\text{O}$ /hexanes). This product was also synthesized in 0.5 mmol scale. **SI-16** can be purified or used directly in the oxidation step in a one-pot procedure.

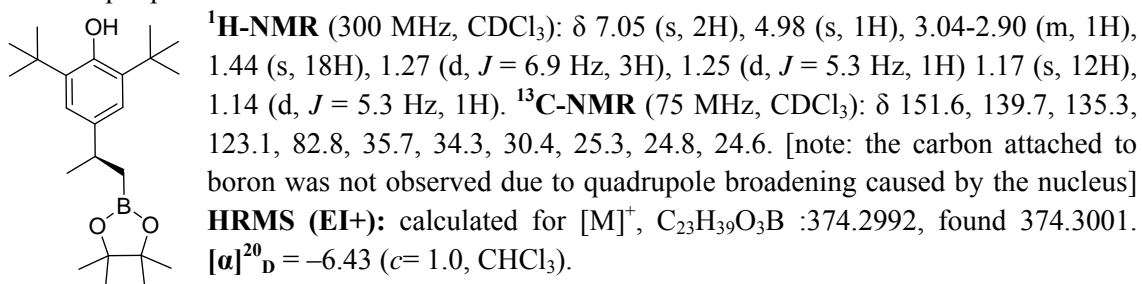

#### 5.3.2. Synthesis of (*S*)-2,6-di-*tert*-Butyl-4-(1-hydroxypropan-2-yl)phenol (**6**)

A solution of boronate **SI-16** (37 mg, 0.1 mmol) in THF (0.7 mL, 0.2M) was cooled to  $0^\circ\text{C}$ . Then, EtOH (0.13 mL, 0.2mL/mL THF), potassium bicarbonate solution (2.0 equiv, 1M in water) and hydrogen peroxide (4 equiv) were added and the mixture was stirred for 2 hours at this temperature. Water and EtOAc were added and the layers were separated. The aqueous layer was extracted with EtOAc and the combined organic layers were dried over  $\text{Na}_2\text{SO}_4$  and filtered. Solvent was removed by rotary evaporation and the crude was purified by flash column chromatography to give **6** (22 mg, 0.083 mmol) with 83% yield as a white solid. This product was also synthesized in 0.5 mmol scale, from **2h**, in a one-pot homologation-oxidation sequence, to give **6** (93 mg, 0.35 mmol) in 71% overall yield.

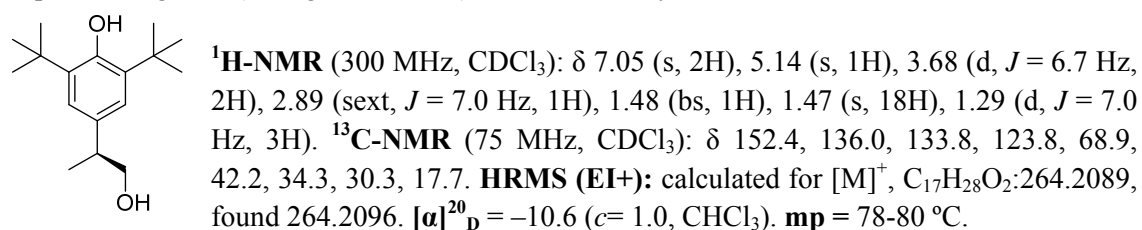

### 5.3.3. Synthesis of (*R*)-4-(1-Phenylpropan-2-yl)phenol (**7**)

A solution of alcohol **6** (50 mg, 0.2 mmol) and AlCl<sub>3</sub> (6 equiv) in dry benzene (0.018 M, 10.5 mL) was stirred at 60 °C for one hour. Water and EtOAc were added and the layers were separated. The aqueous layer was extracted with EtOAc (x3) and the combined organic layers were dried over Na<sub>2</sub>SO<sub>4</sub> and filtered. Solvent was removed by rotary evaporation and the crude product was purified by flash chromatography to give **7** (23 mg, 0.12 mmol) in 60% yield as a white solid.  $R_f$  = 0.30 (20% Et<sub>2</sub>O/hexanes)

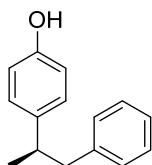

**<sup>1</sup>H-NMR** (300 MHz, CDCl<sub>3</sub>):  $\delta$  7.20 (dd,  $J$  = 7.6, 6.2 Hz, 2H), 7.10 (t,  $J$  = 7.3 Hz, 3H), 6.85 (d,  $J$  = 8.4 Hz, 2H), 6.62 (d,  $J$  = 8.5 Hz, 2H), 4.61 (s, 1H), 2.93-2.74 (m, 2H), 2.62 (dd,  $J$  = 13.1, 7.9 Hz, 1H), 1.15 (d,  $J$  = 6.7 Hz, 3H). **<sup>13</sup>C-NMR** (75 MHz, CDCl<sub>3</sub>):  $\delta$  153.6, 147.0, 133.1, 130.2, 128.2, 127.1, 125.9, 114.9, 44.1, 42.0, 21.1. **HRMS (EI+)**: calculated for [M]<sup>+</sup>, C<sub>15</sub>H<sub>16</sub>O: 212.1201, found 212.1198.  $[\alpha]_D^{20}$  = +52.7 ( $c$  = 1.0, CHCl<sub>3</sub>). **mp** = 52-54 °C.

## 6.NMR Spectra

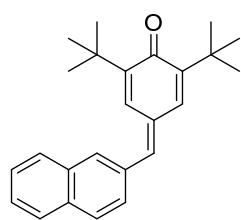

**1b**

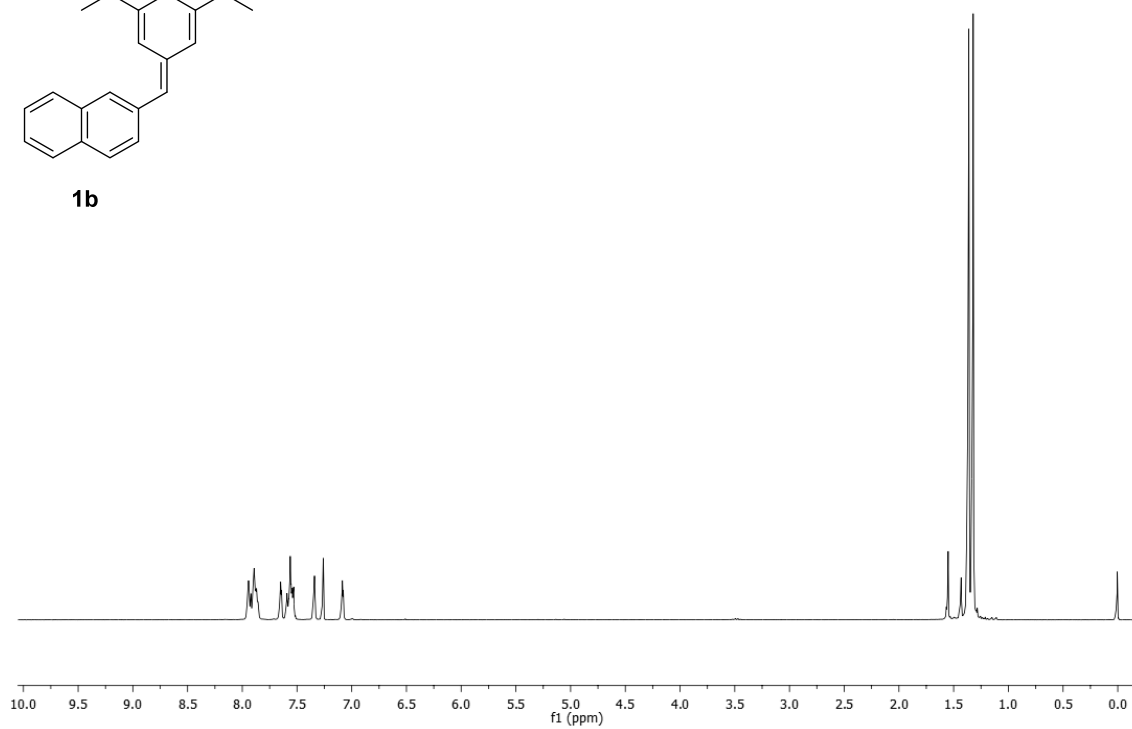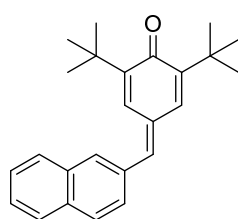

**1b**

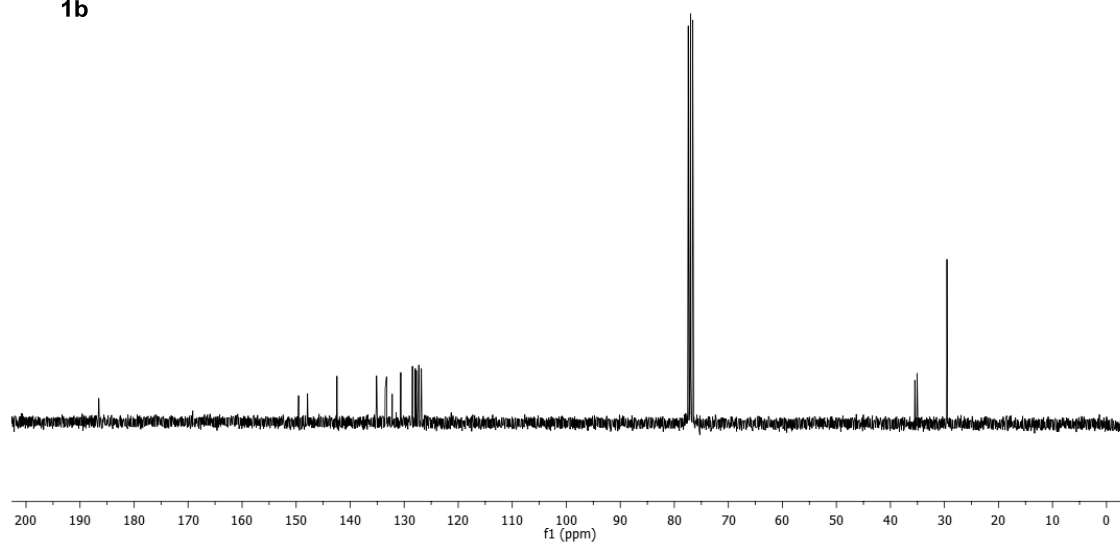

Figure S2: Spectra of compound **1b**.

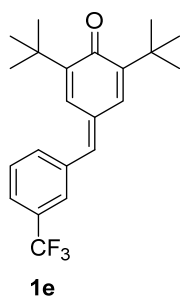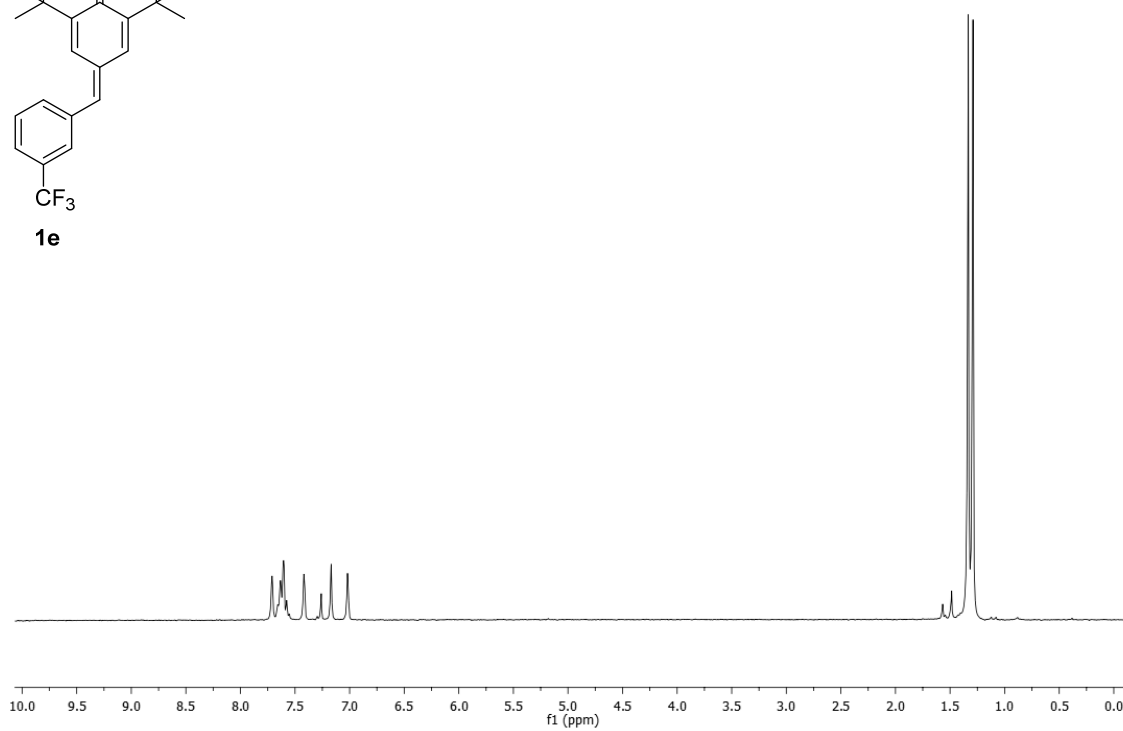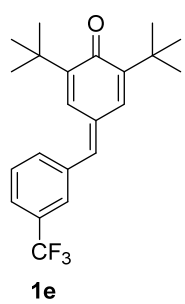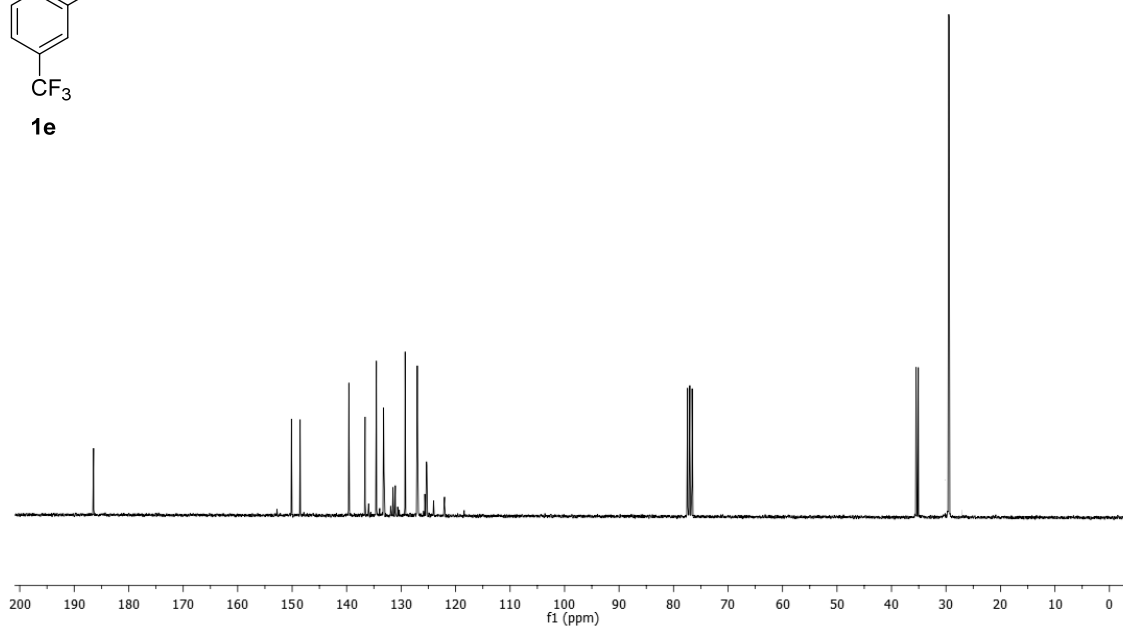

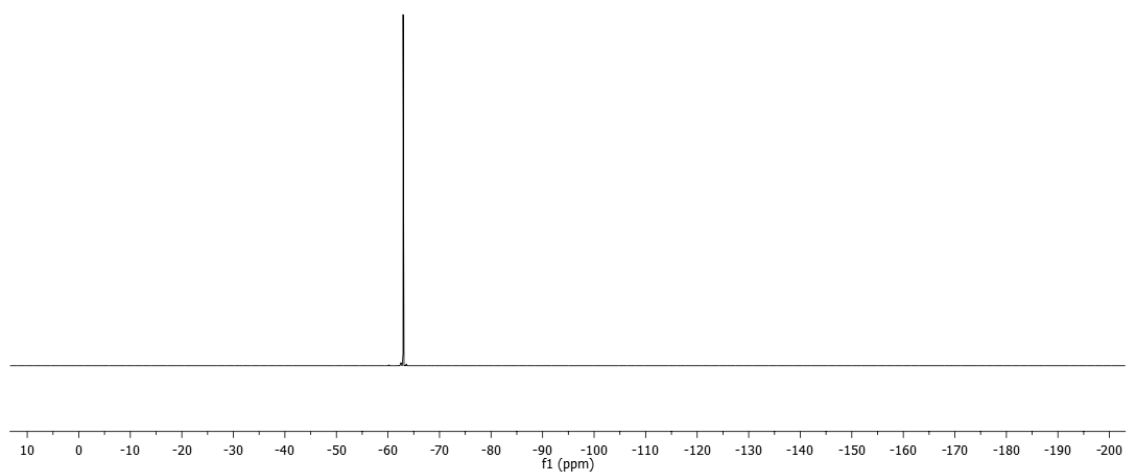

Figure S3: Spectra of compound **1e**.

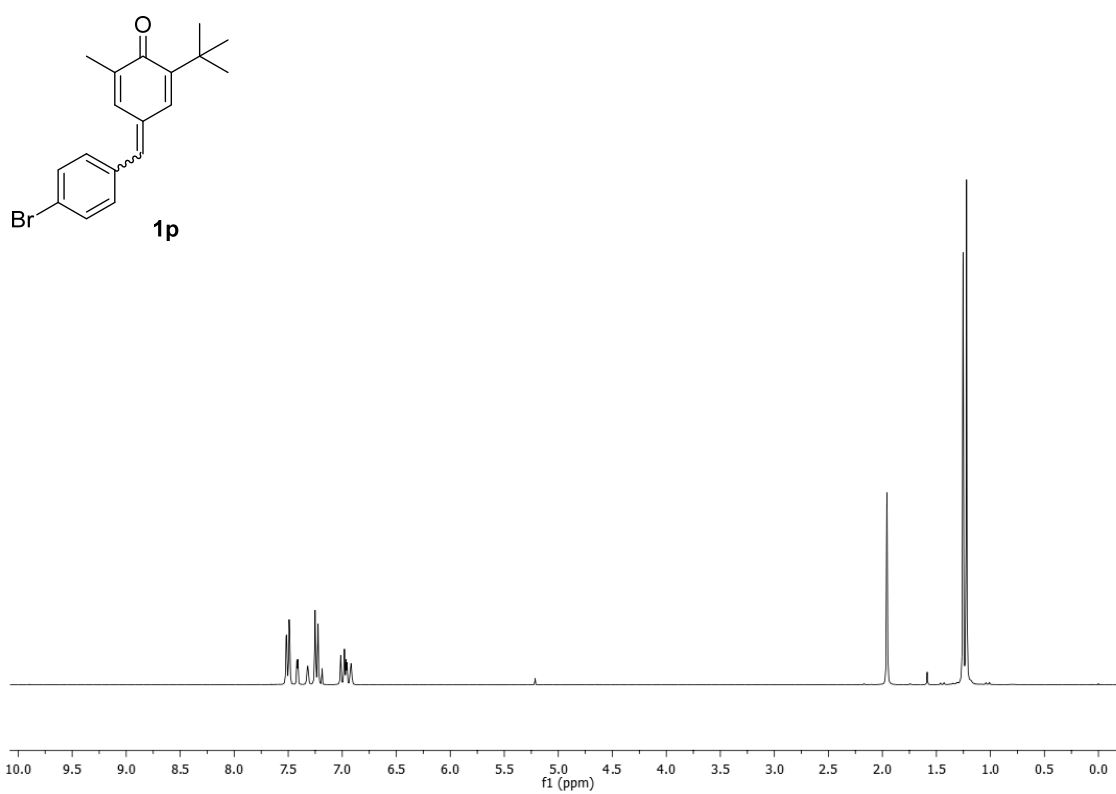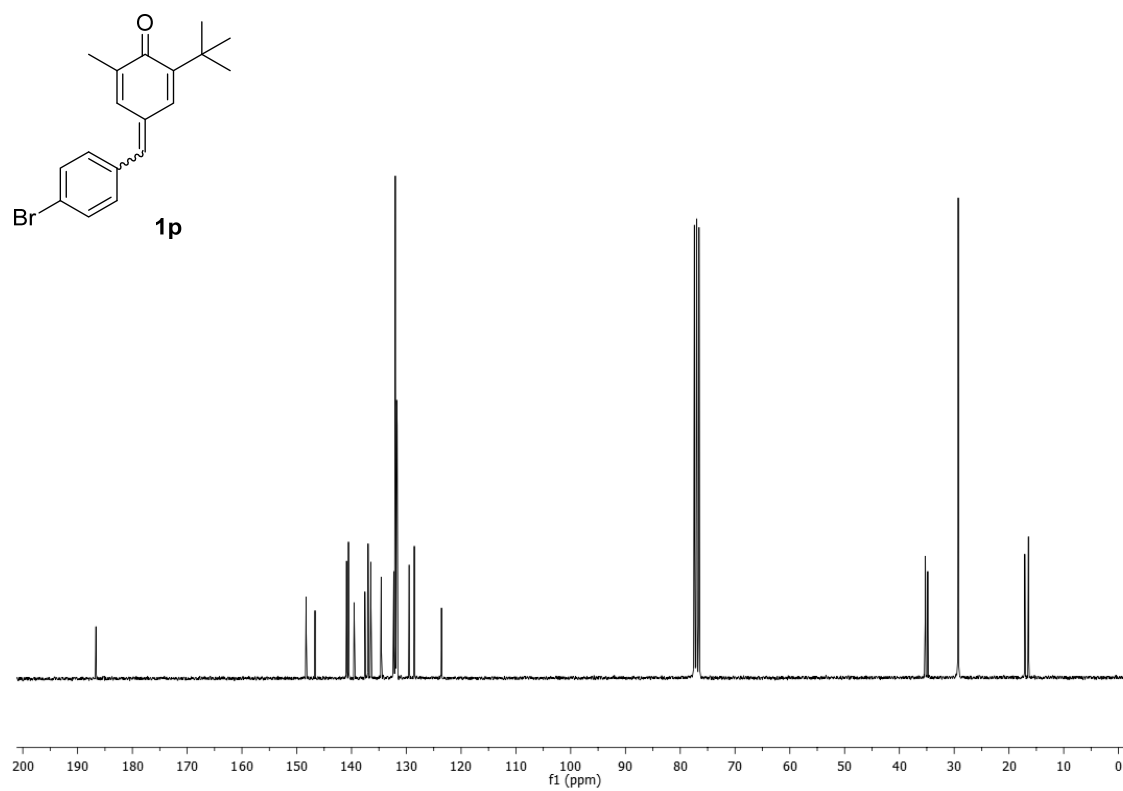

Figure S4: Spectra of compound **1p**.

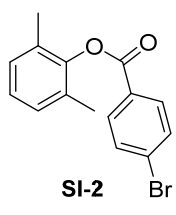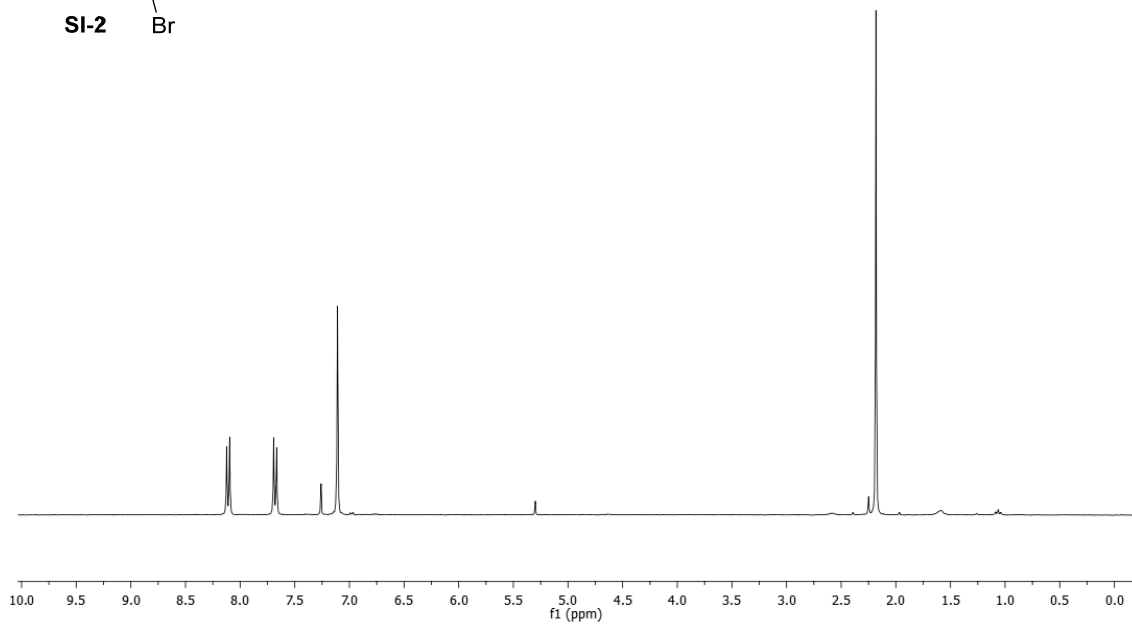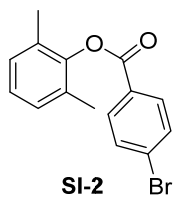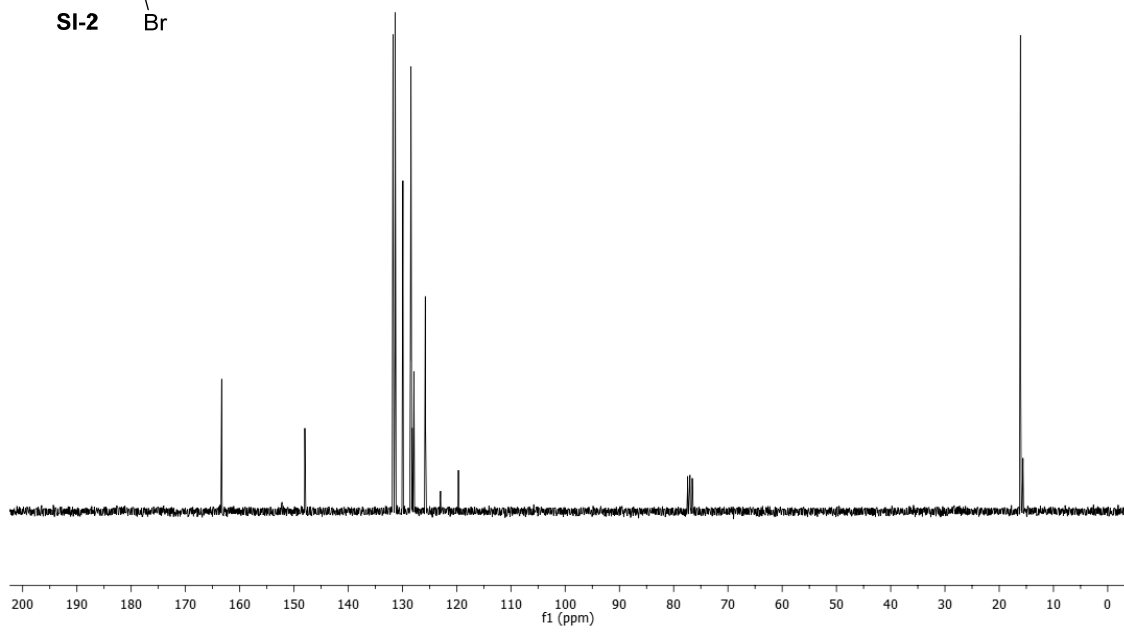

Figure S5: Spectra of compound **SI-2**.

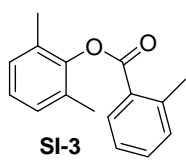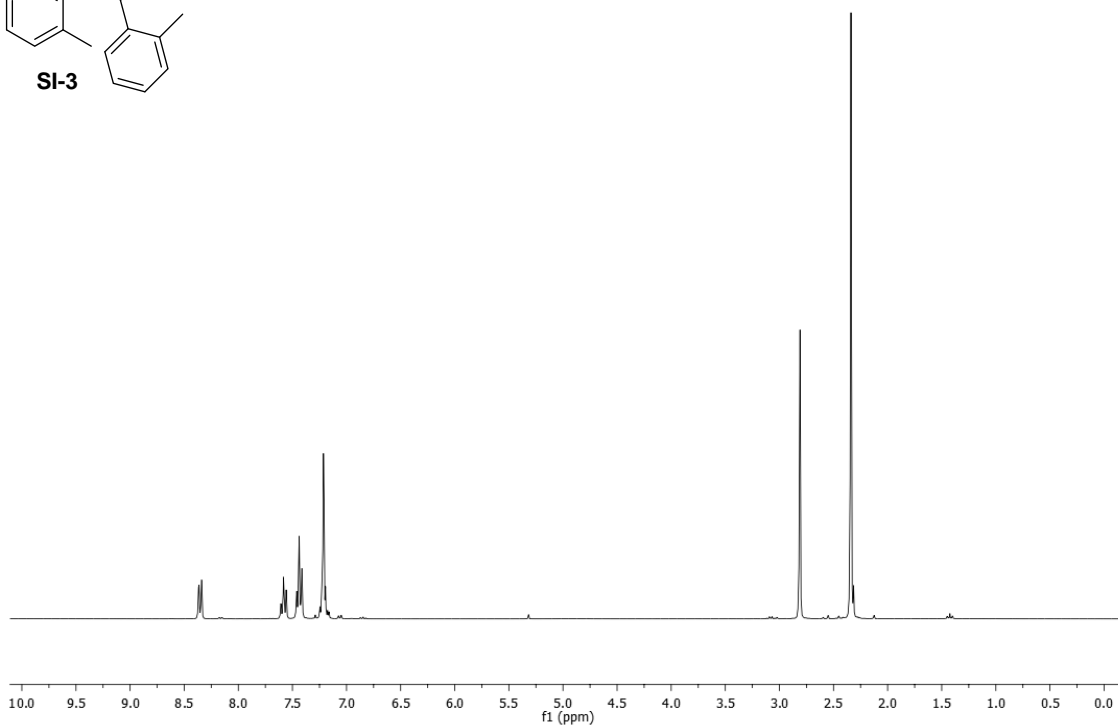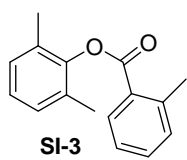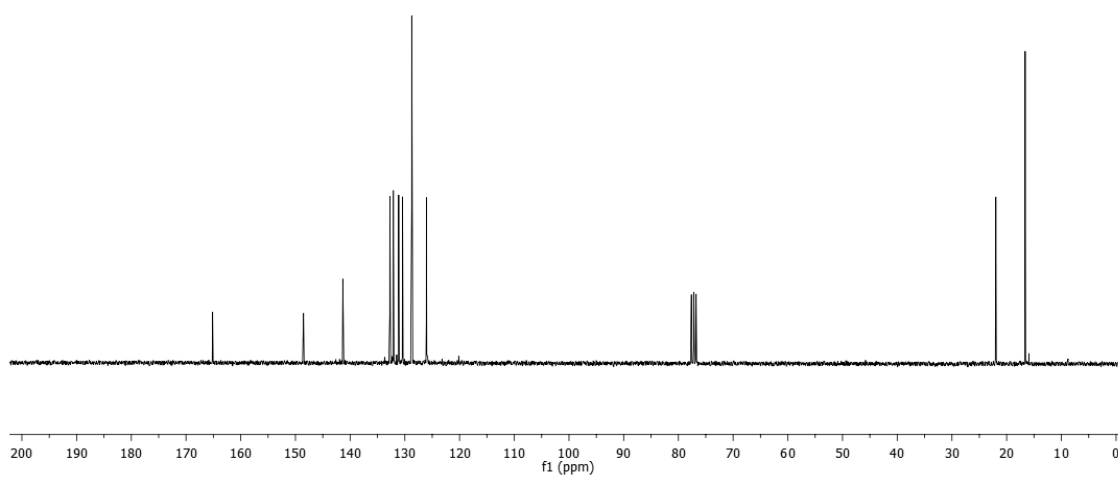

Figure S6: Spectra of compound **SI-3**.



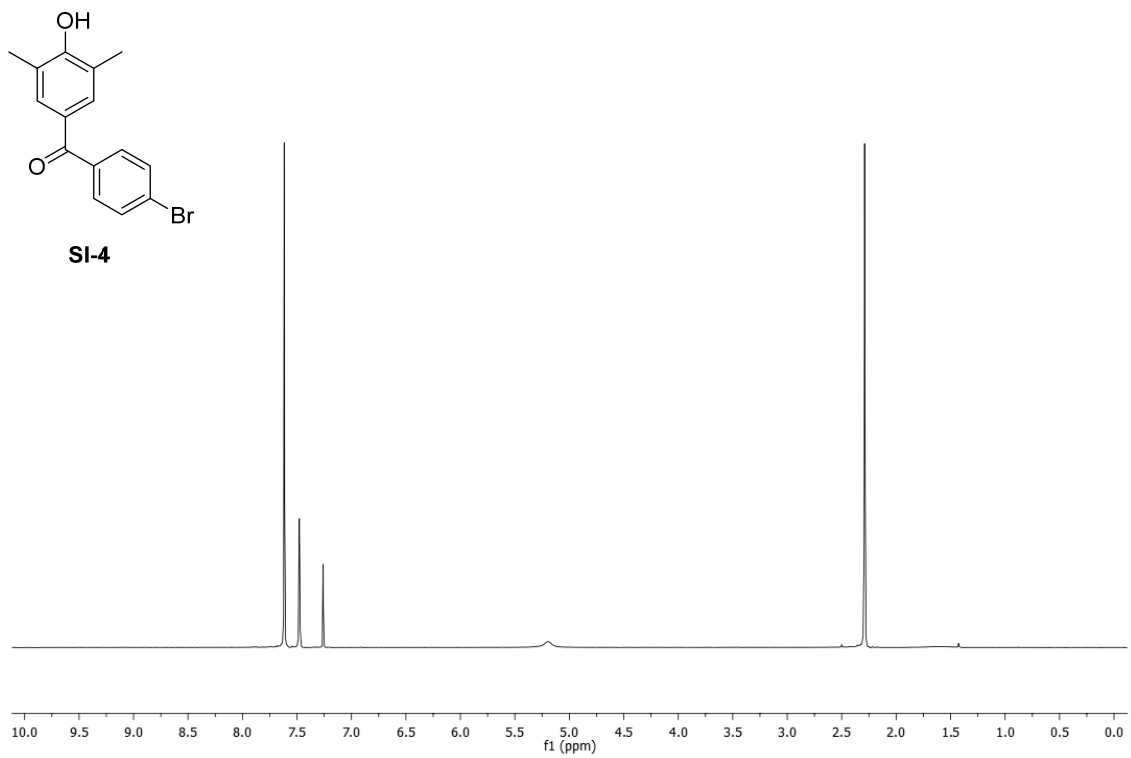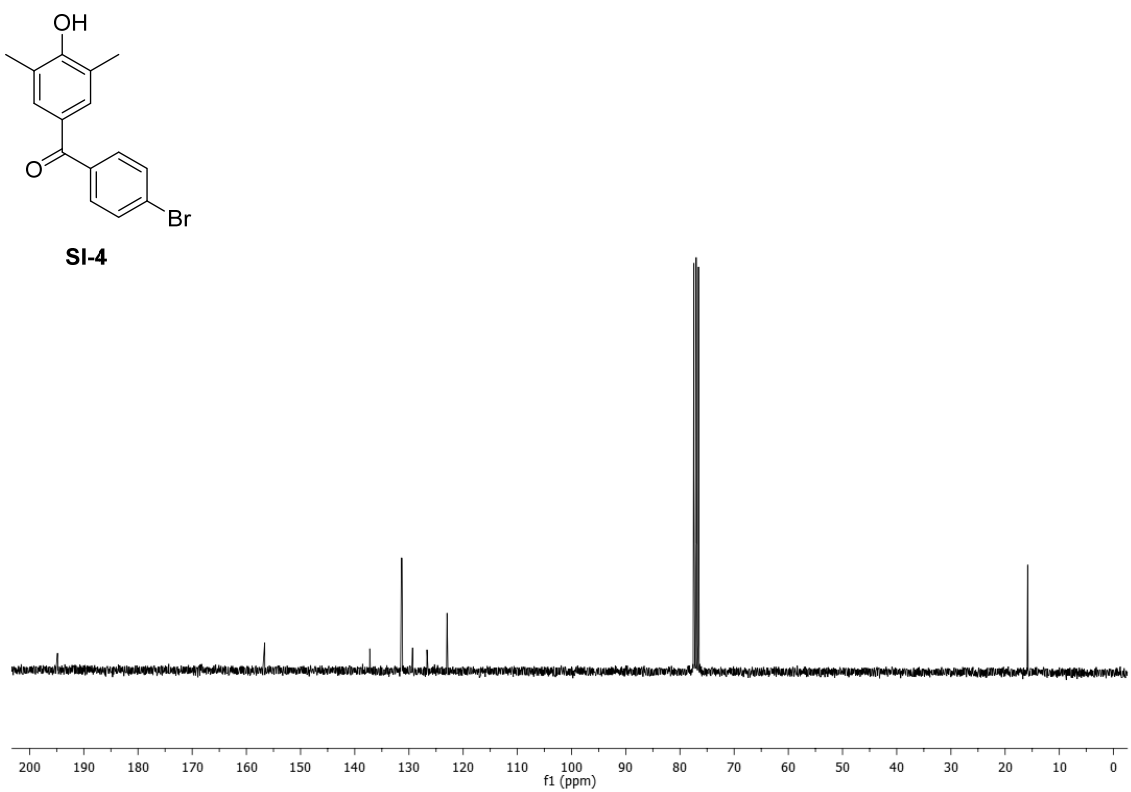

Figure S7: Spectra of compound **SI-4**.

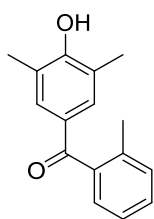

**SI-5**

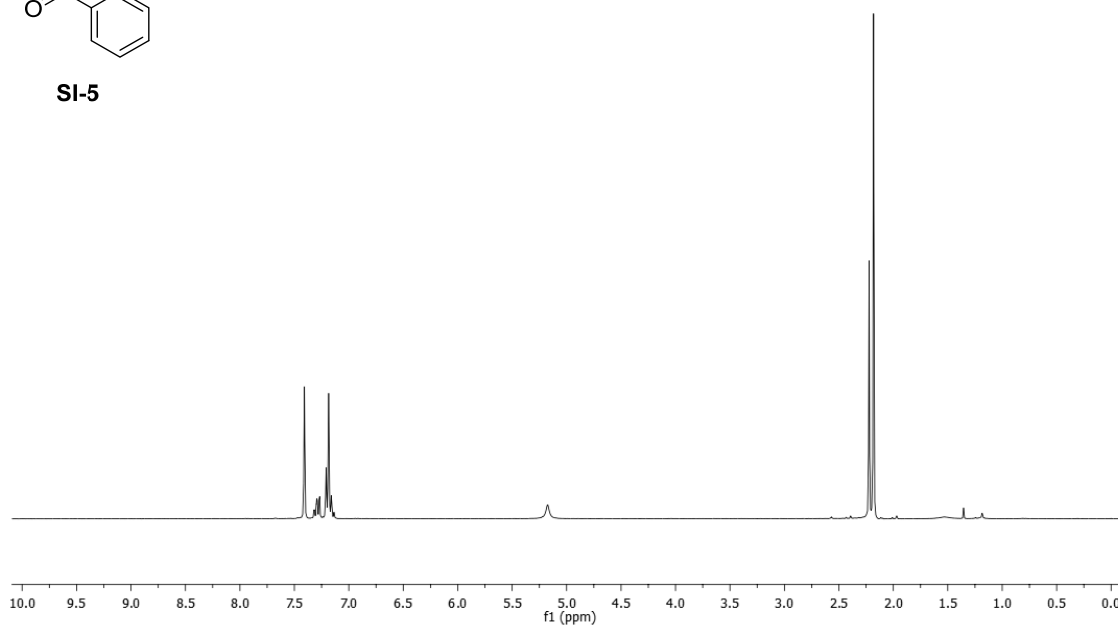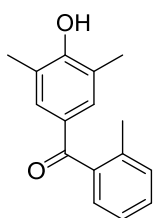

**SI-5**

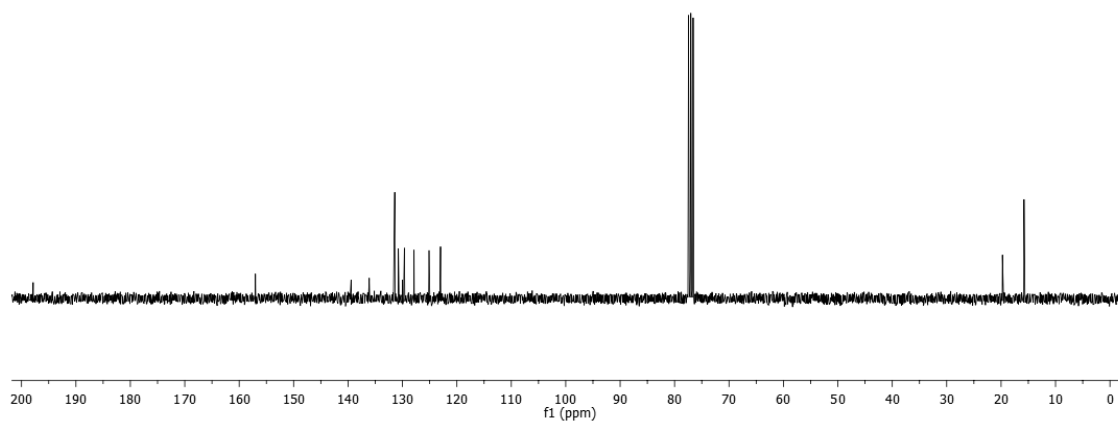

Figure S8: Spectra of compound SI-5.

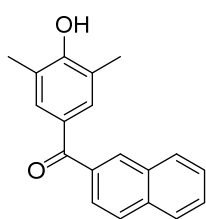

**SI-6**

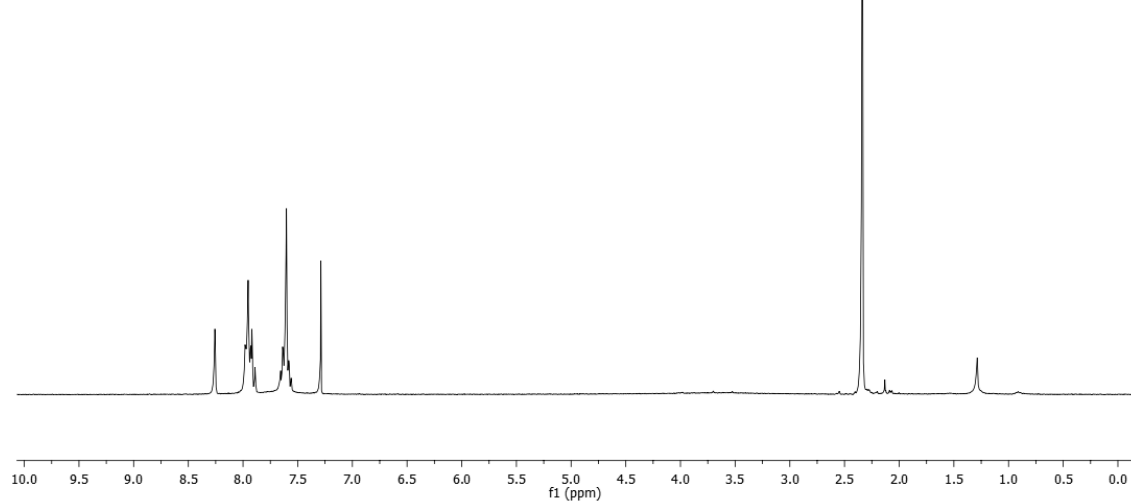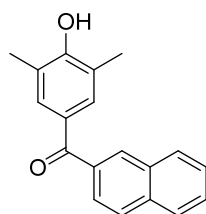

**SI-6**

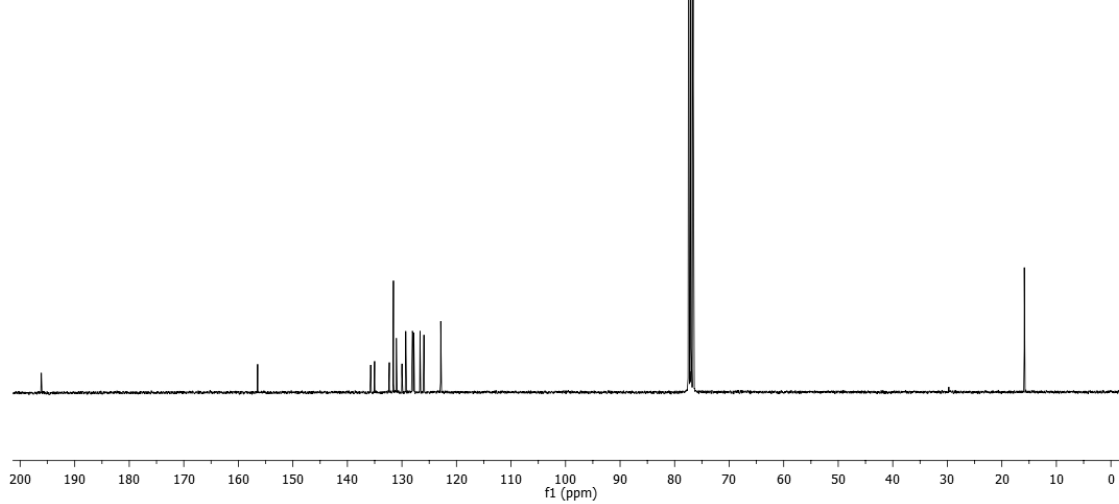

Figure S9: Spectra of compound **SI-6**.

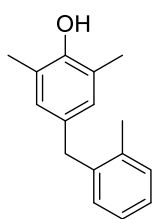

SI-7

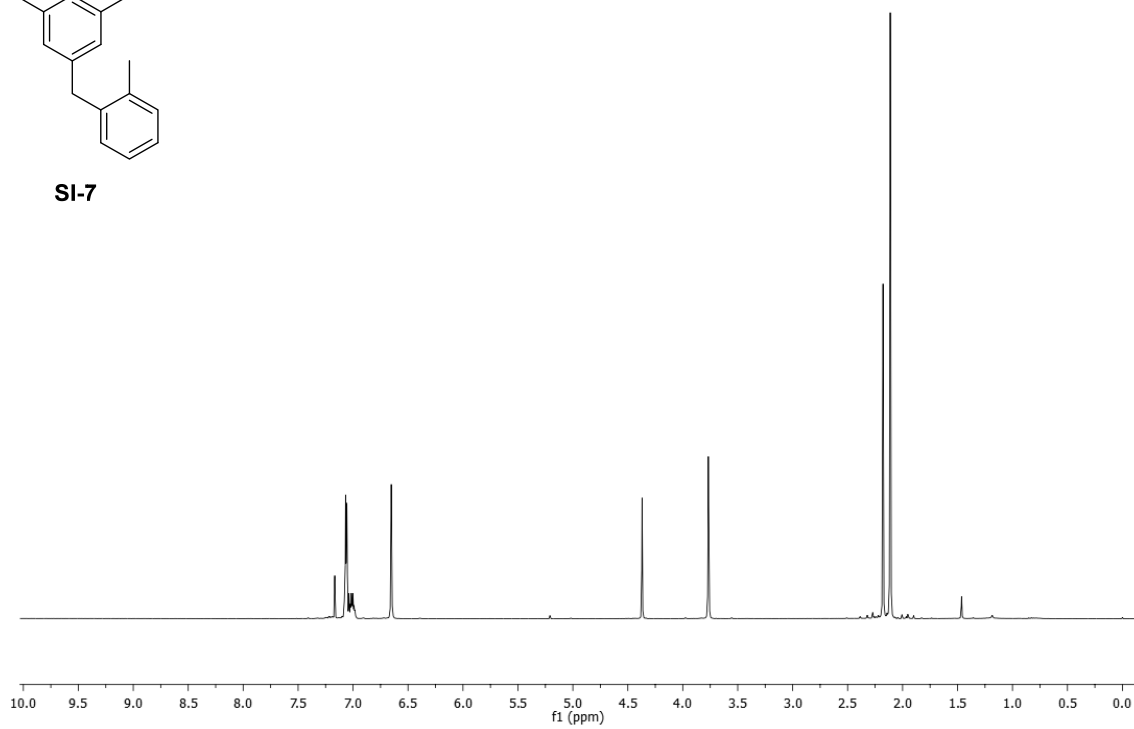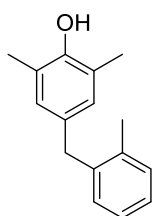

SI-7

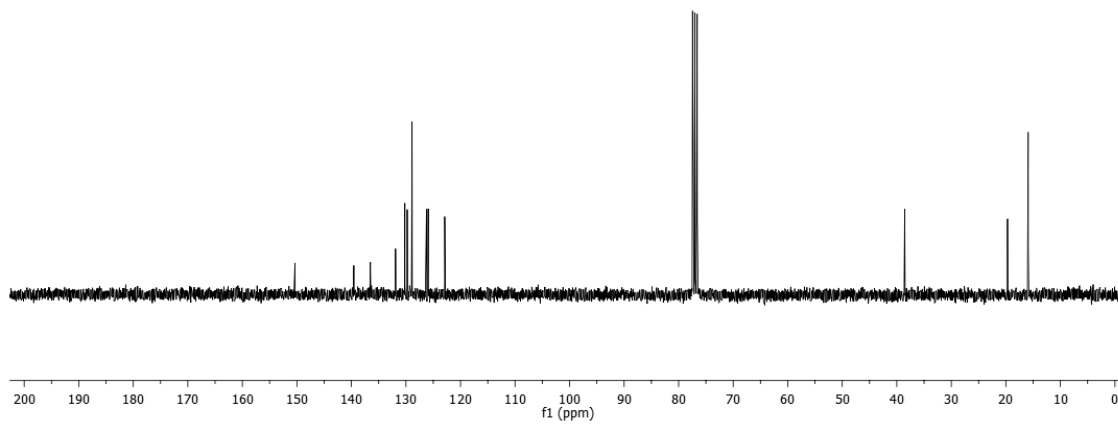

Figure S10. Spectra of compound SI-7.

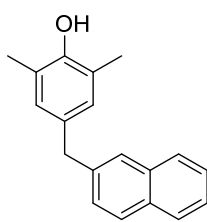

**SI-8**

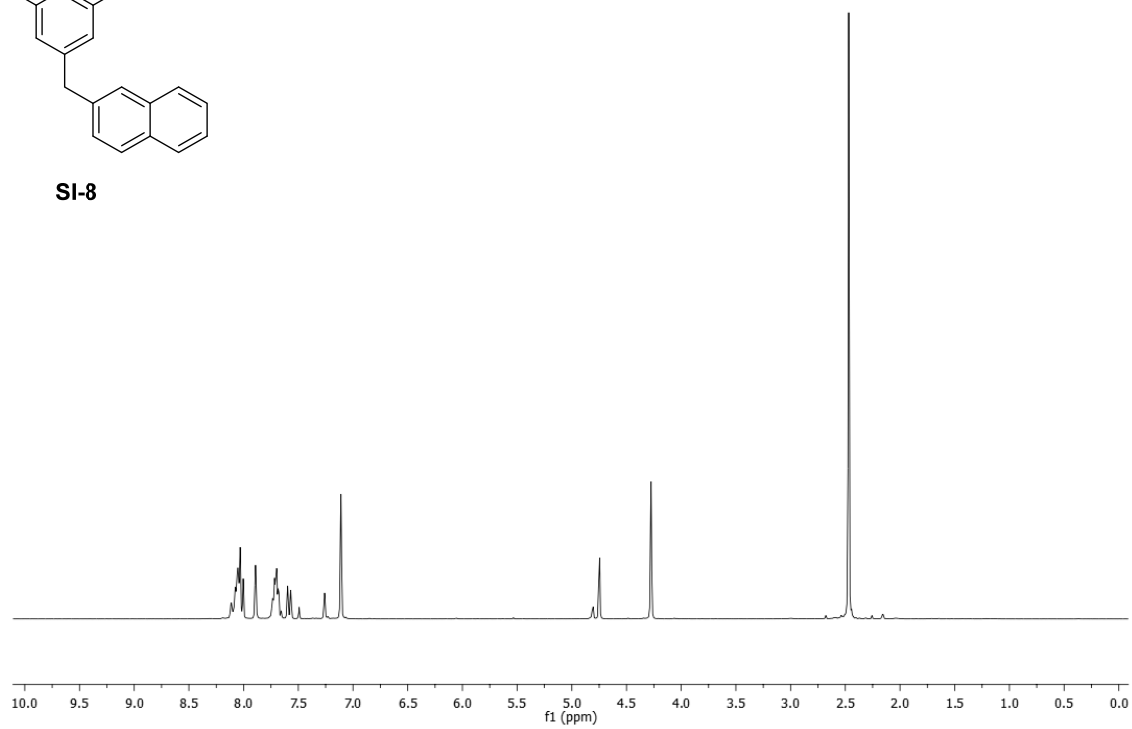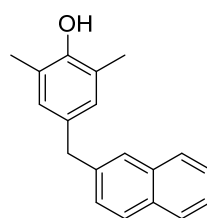

**SI-8**

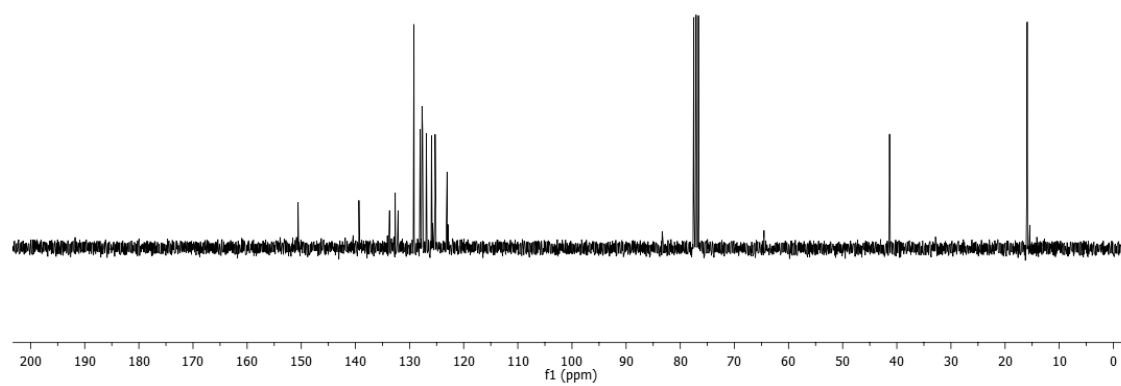

Figure S11: Spectra of compound **SI-8**.

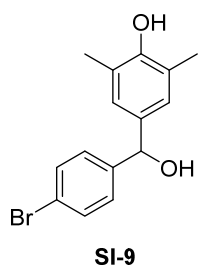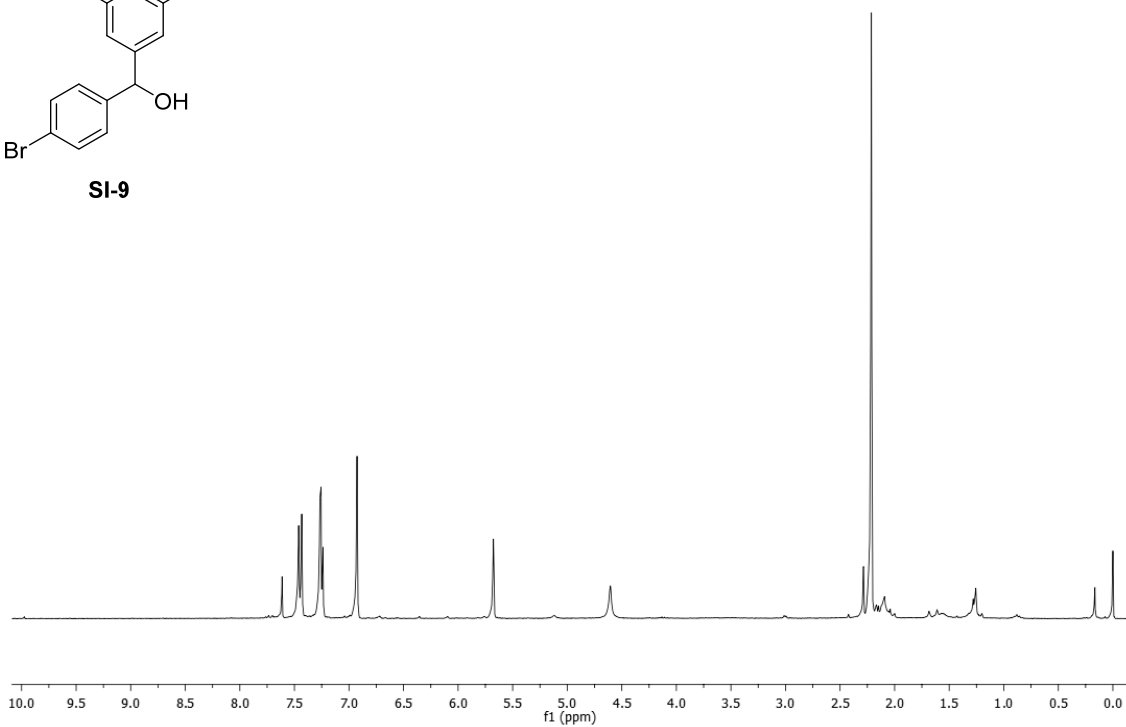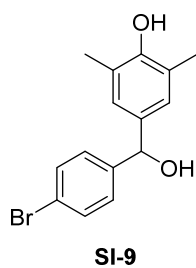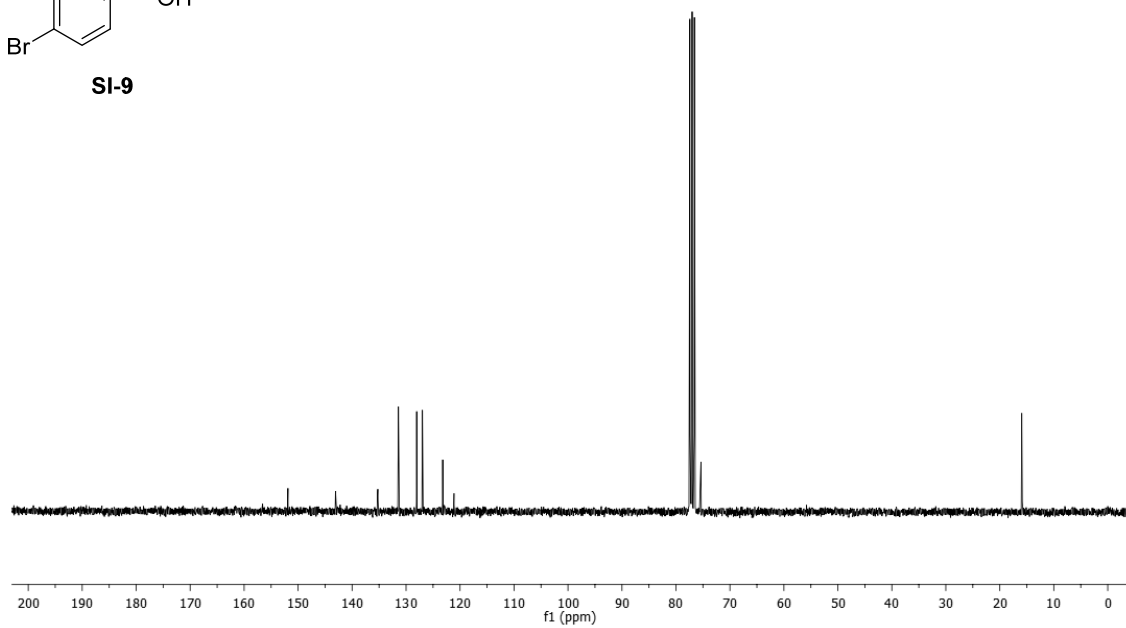

Figure S12. Spectra of compound **SI-9**.

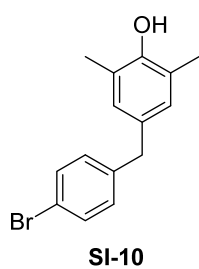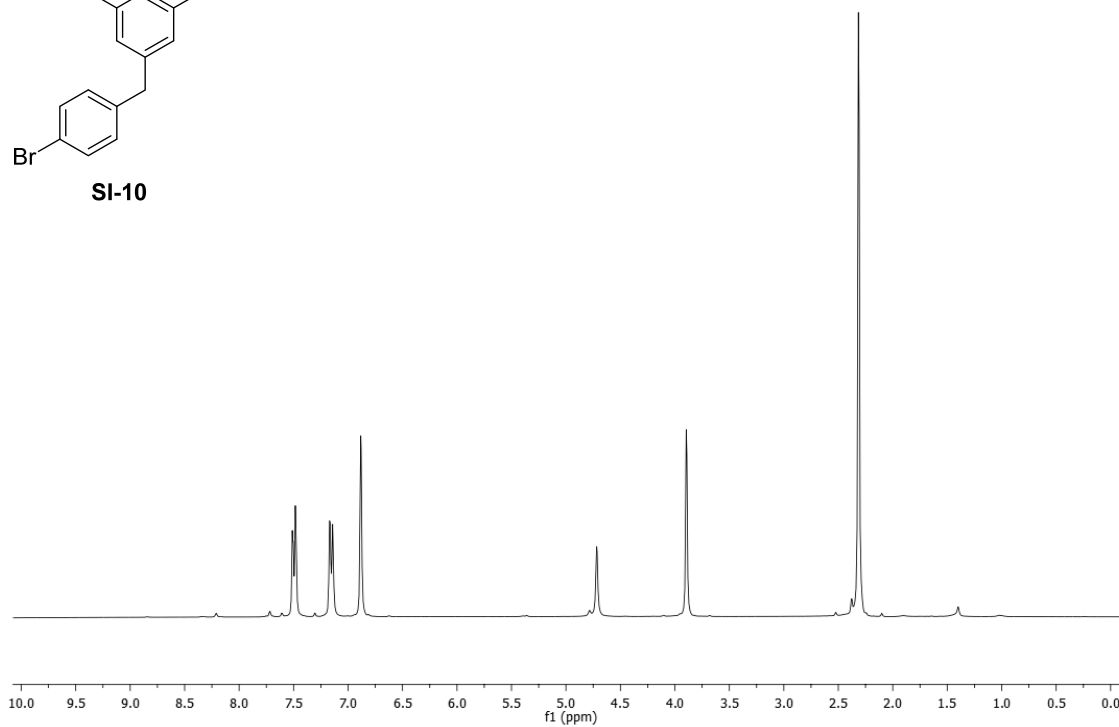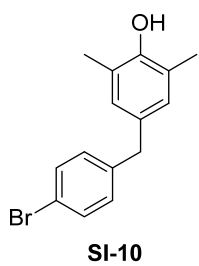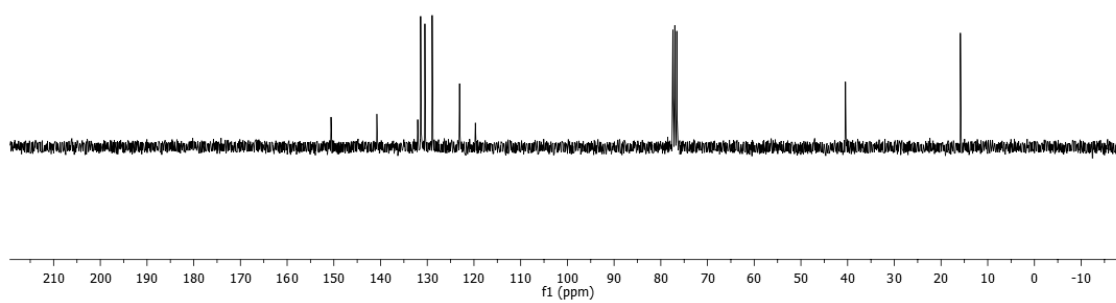

Figure S13. Spectra of compound **SI-10**.

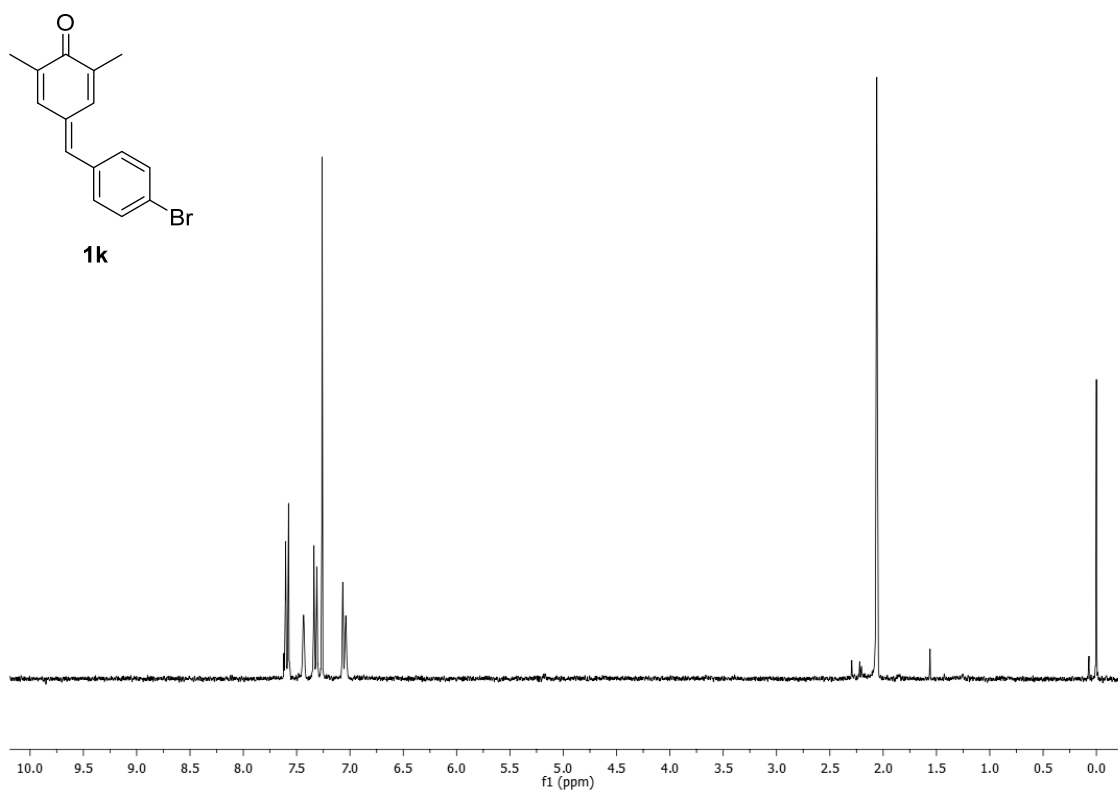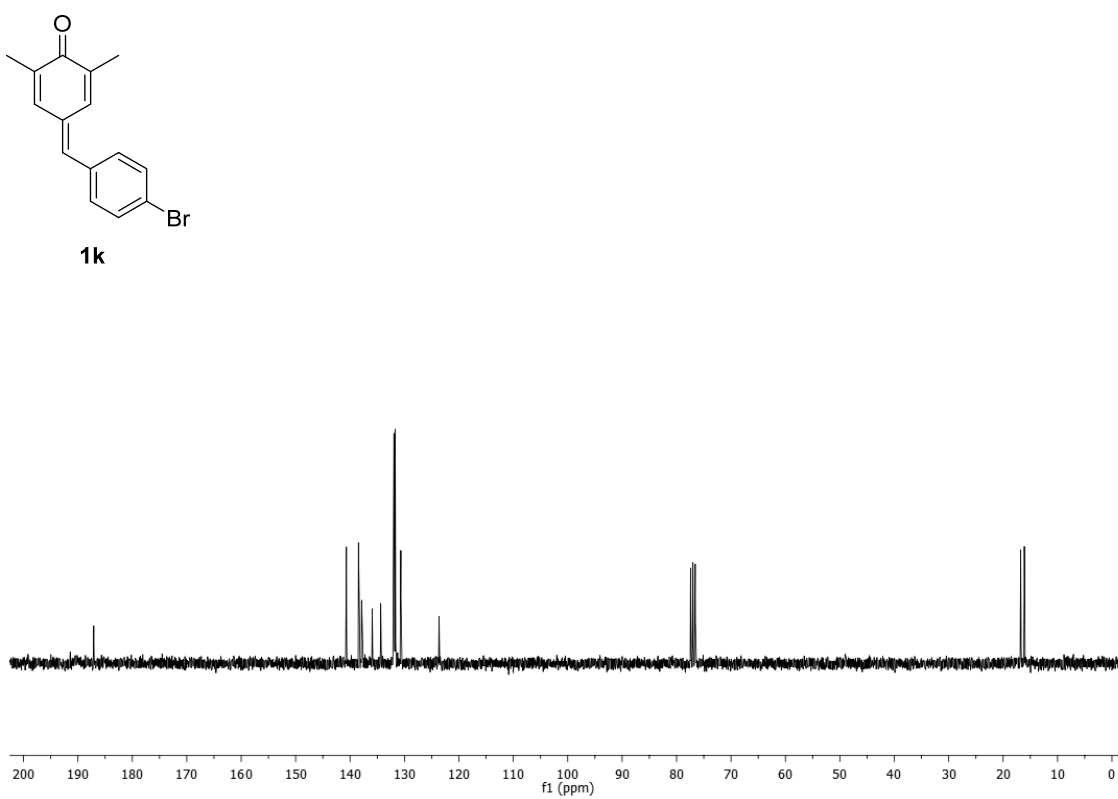

Figure S14. Spectra of compound **1k**.



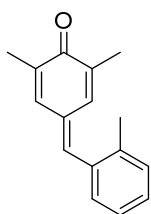

**11**

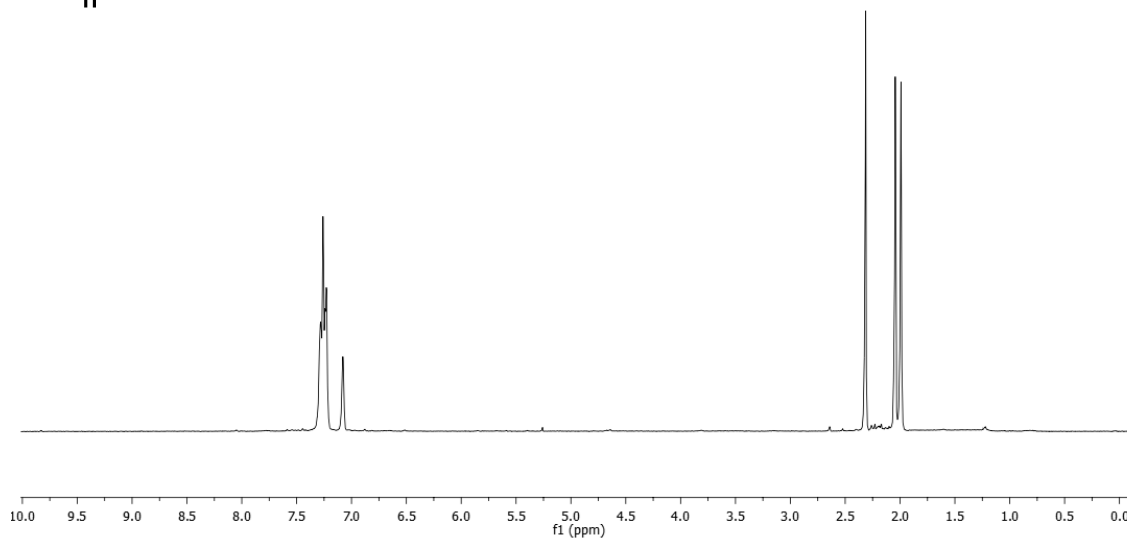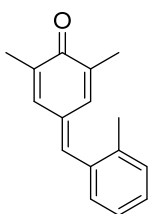

**11**

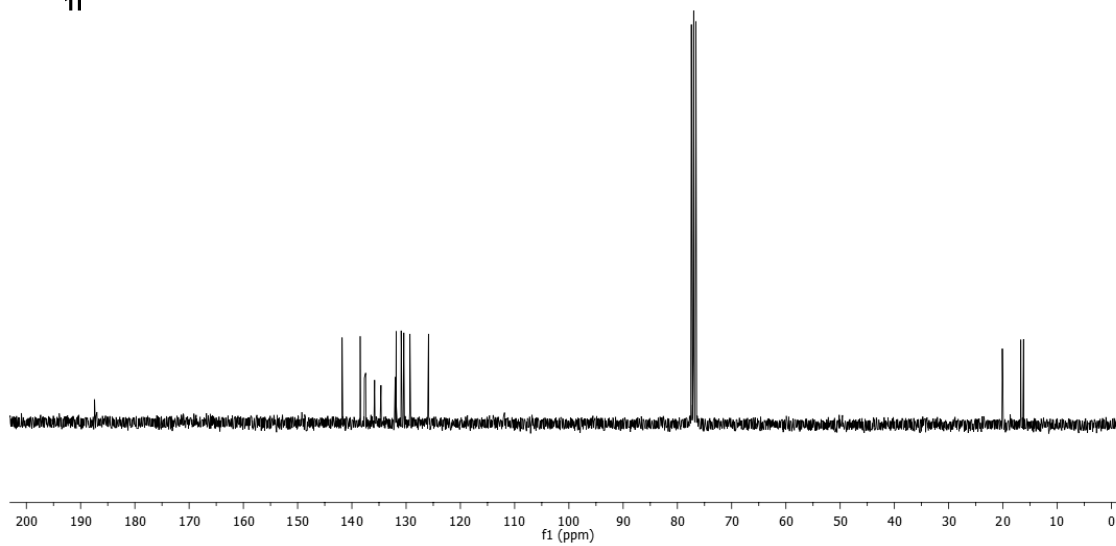

Figure S15. Spectra of compound **11**.

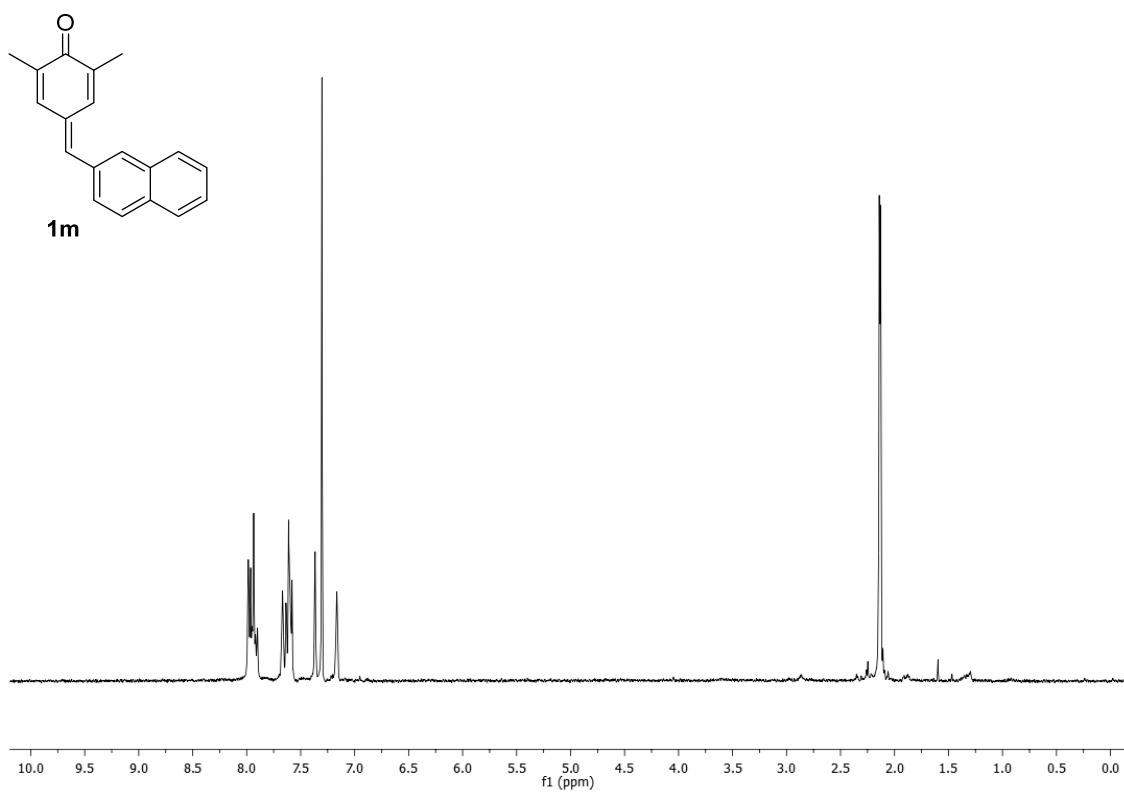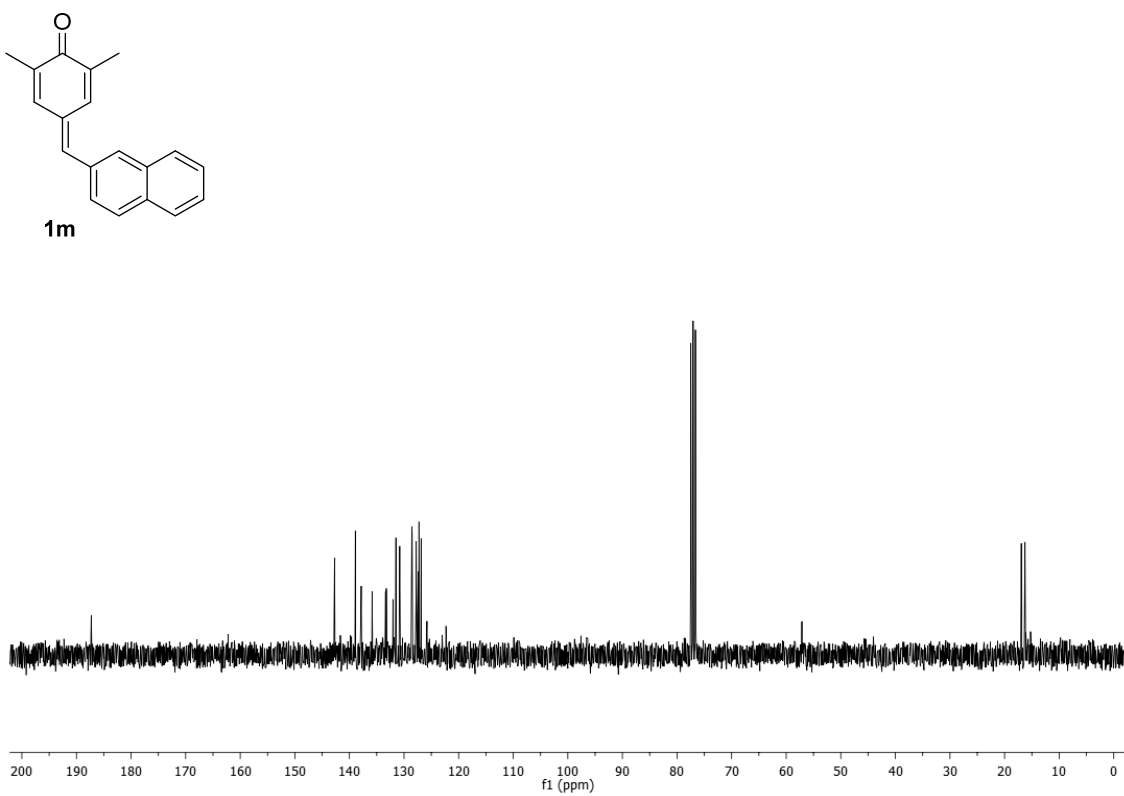

Figure S16. Spectra of compound **1m**.

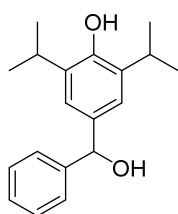

SI-12

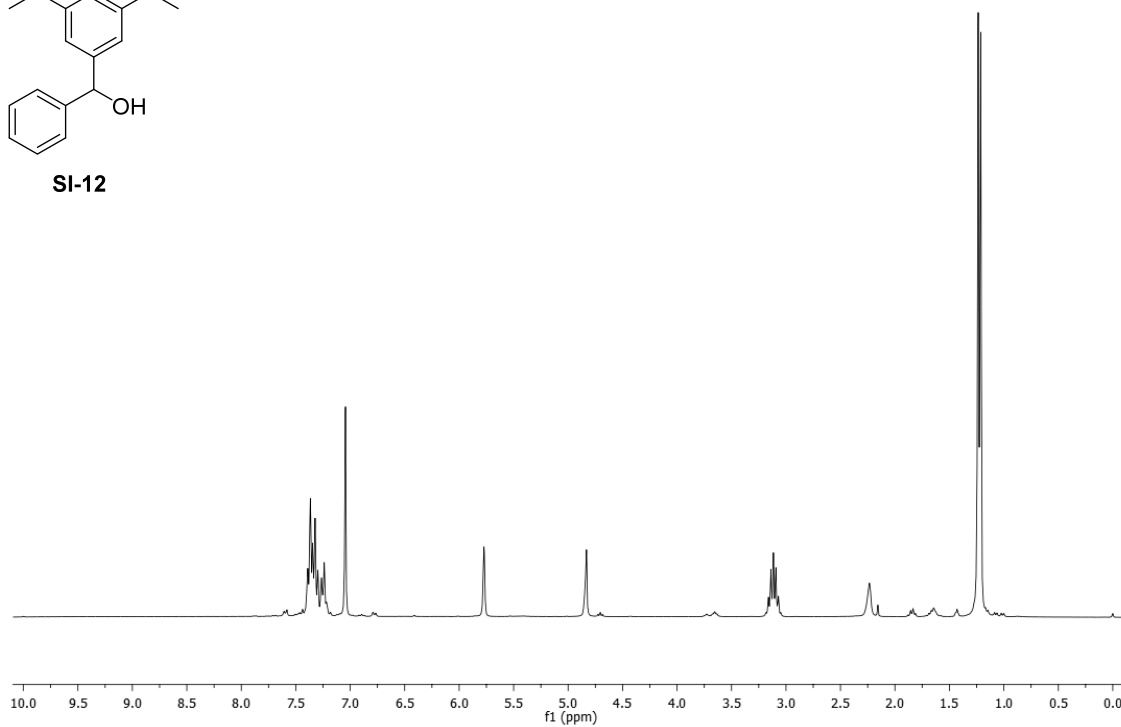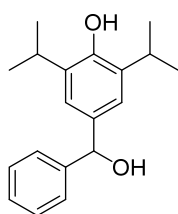

SI-12

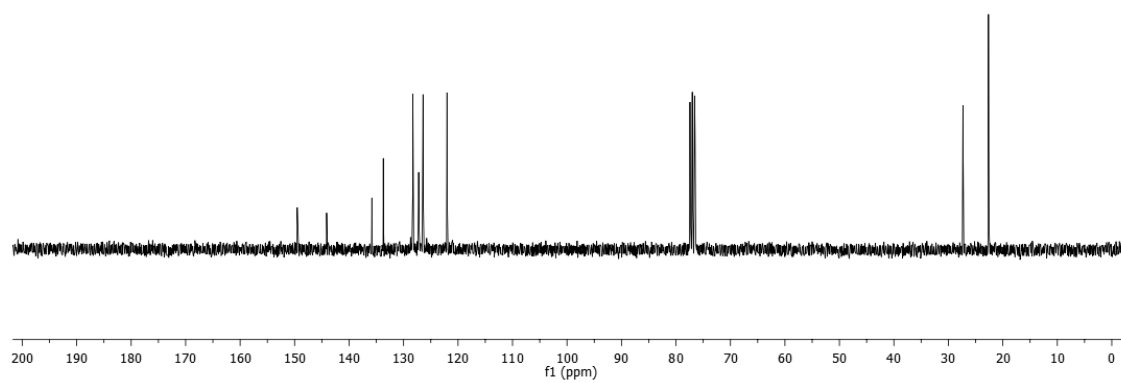

Figure S17. Spectra of compound SI-12.

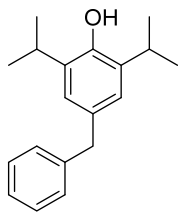

SI-13

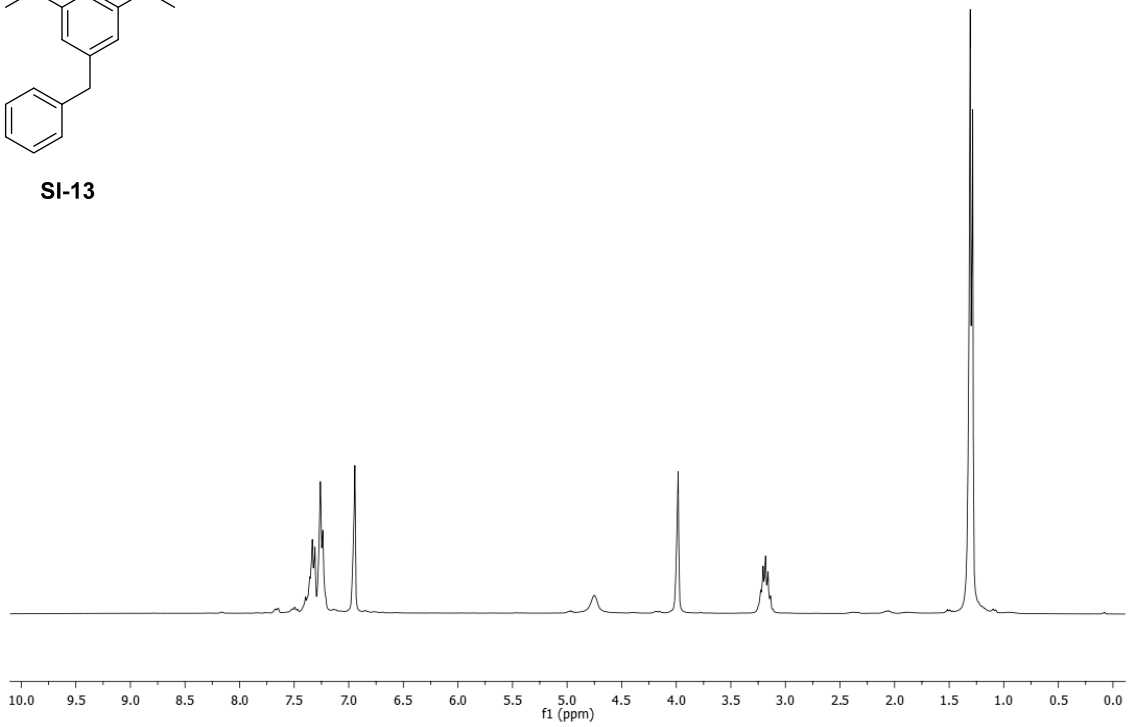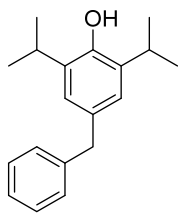

SI-13

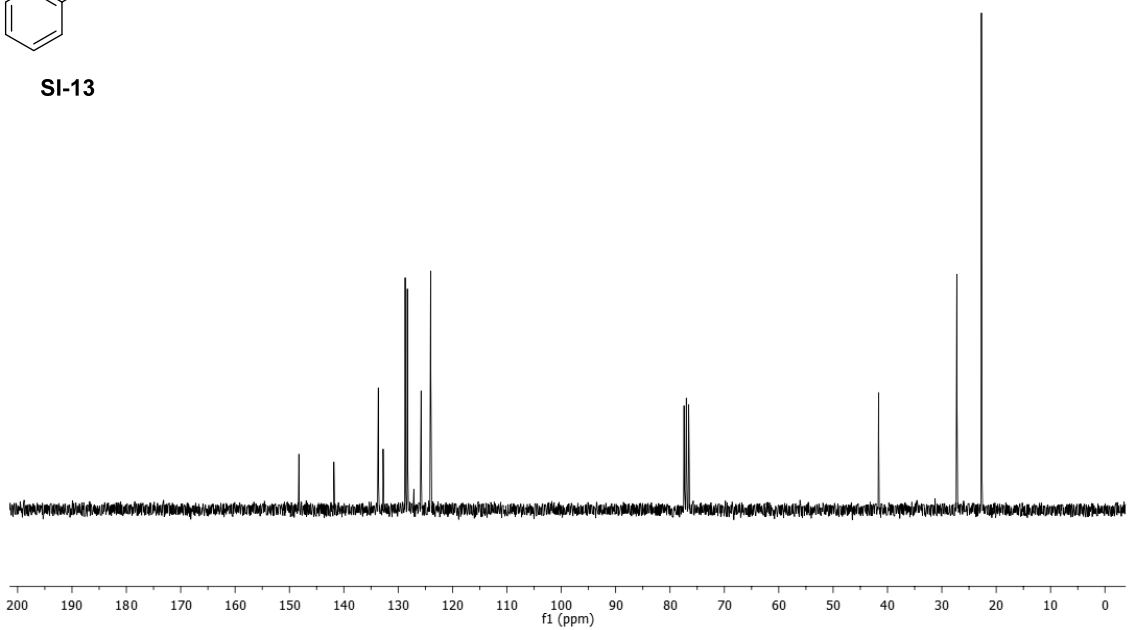

Figure S18. Spectra of compound SI-13.

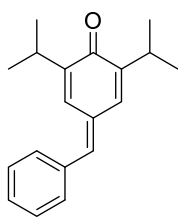

**1n**

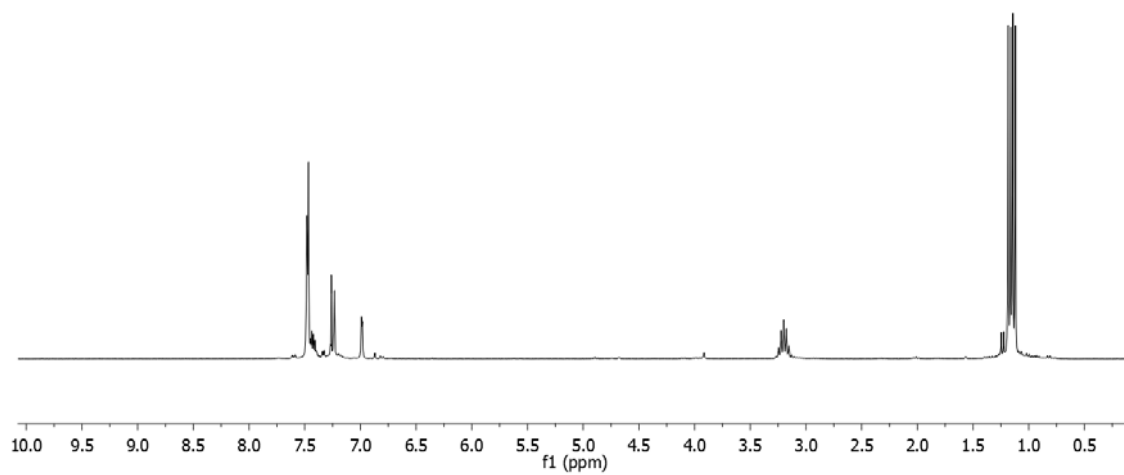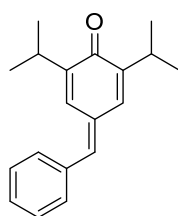

**1n**

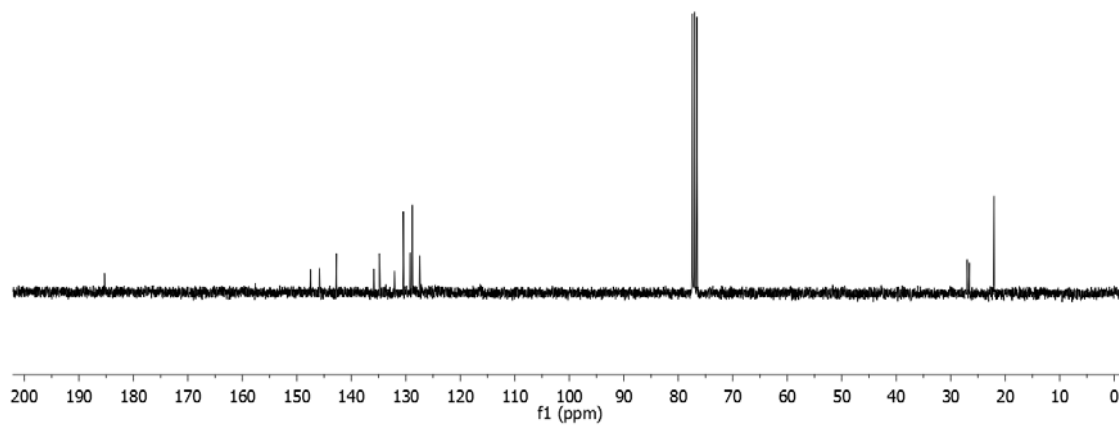

Figure S19. Spectra of compound **1n**.

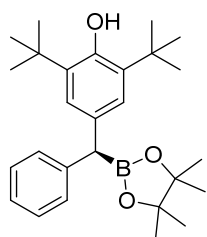

**2a**

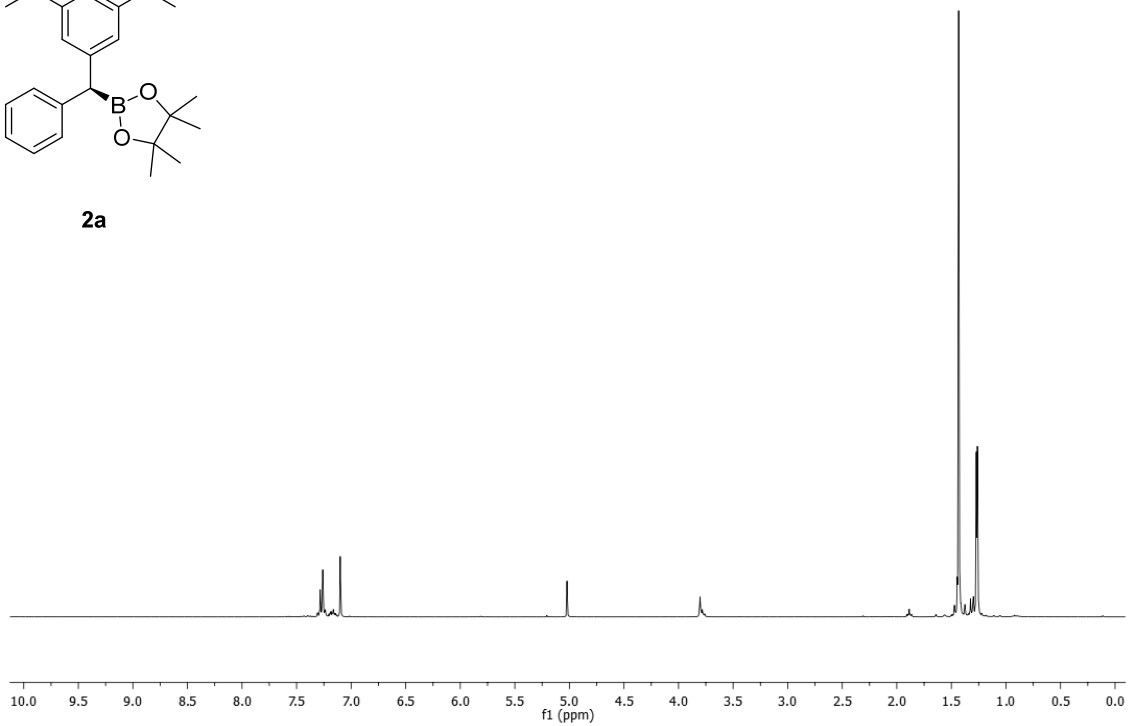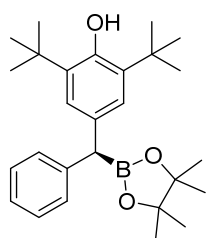

**2a**

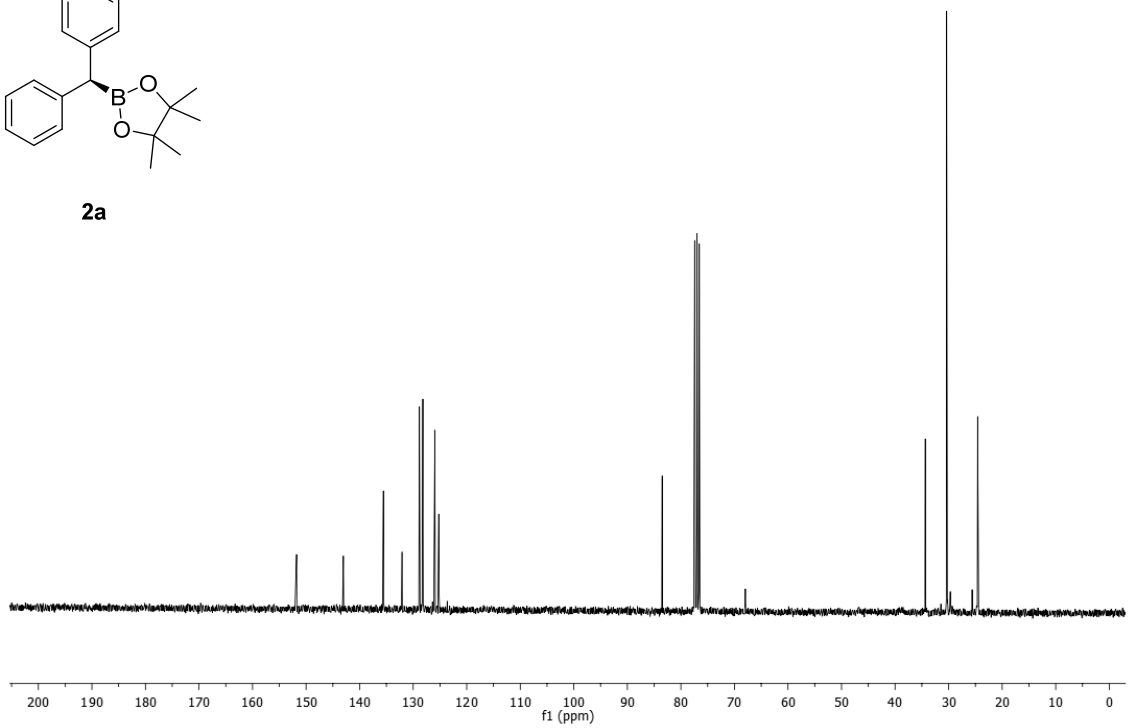

Figure S20: Spectra of compound **2a**.

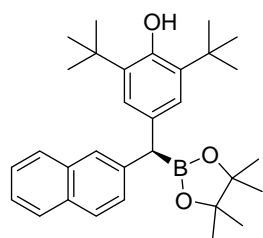

**2b**

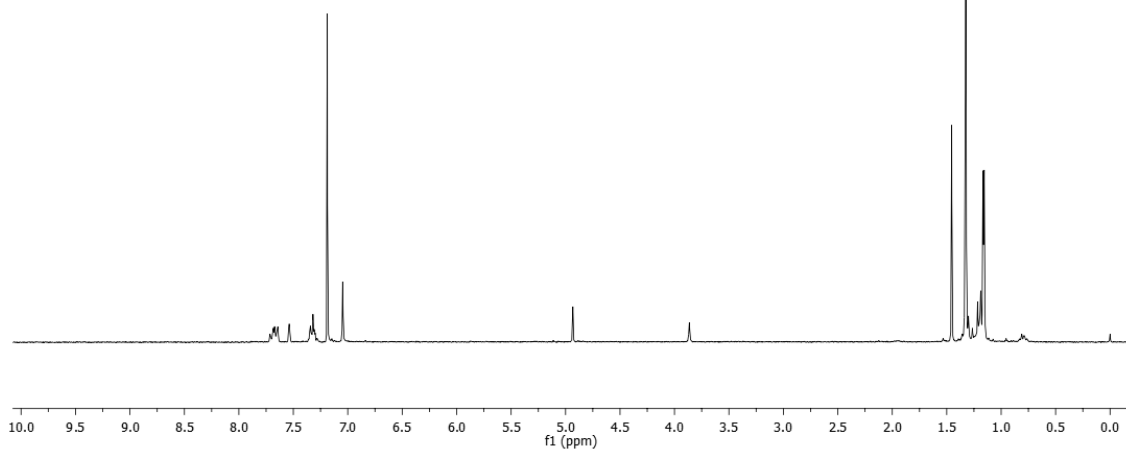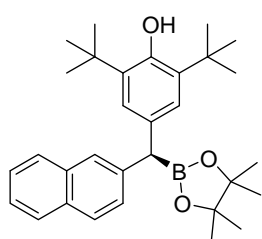

**2b**

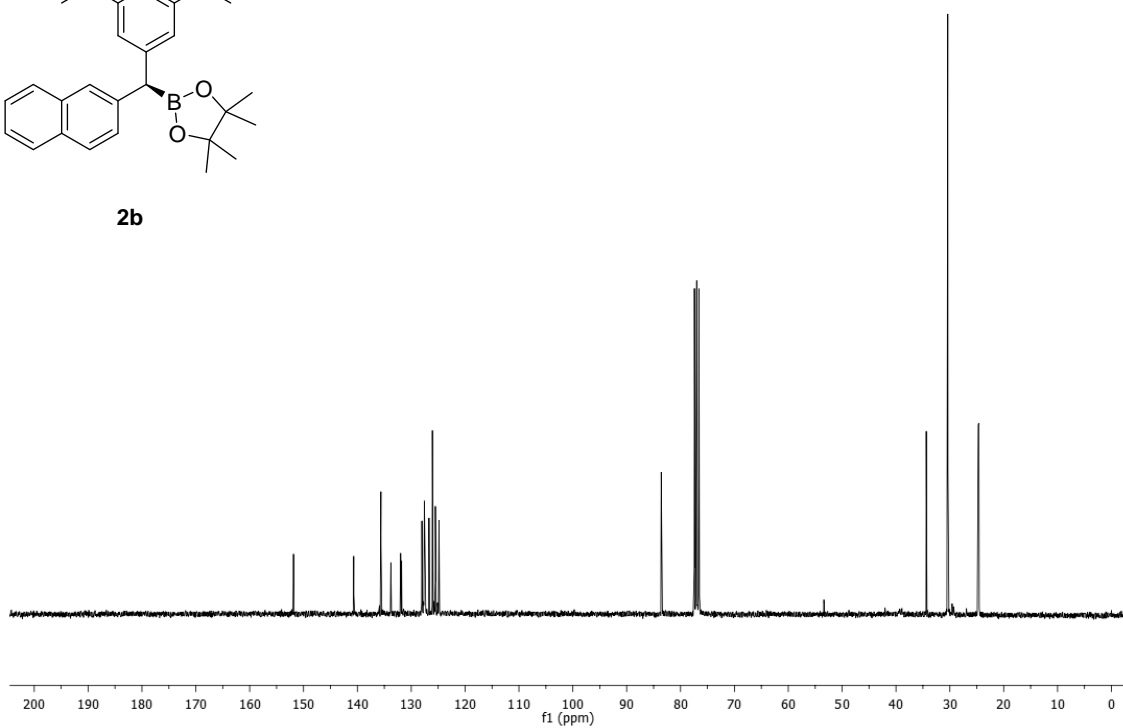

Figure S21: Spectra of compound **2b**.

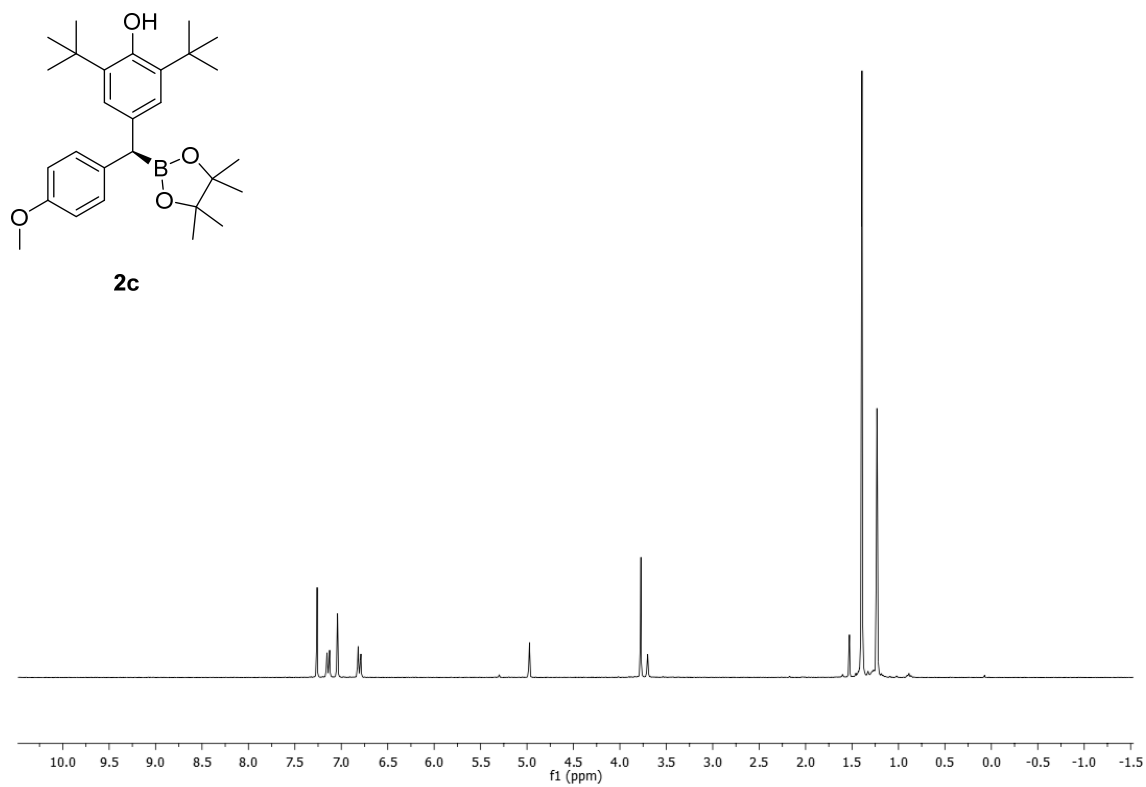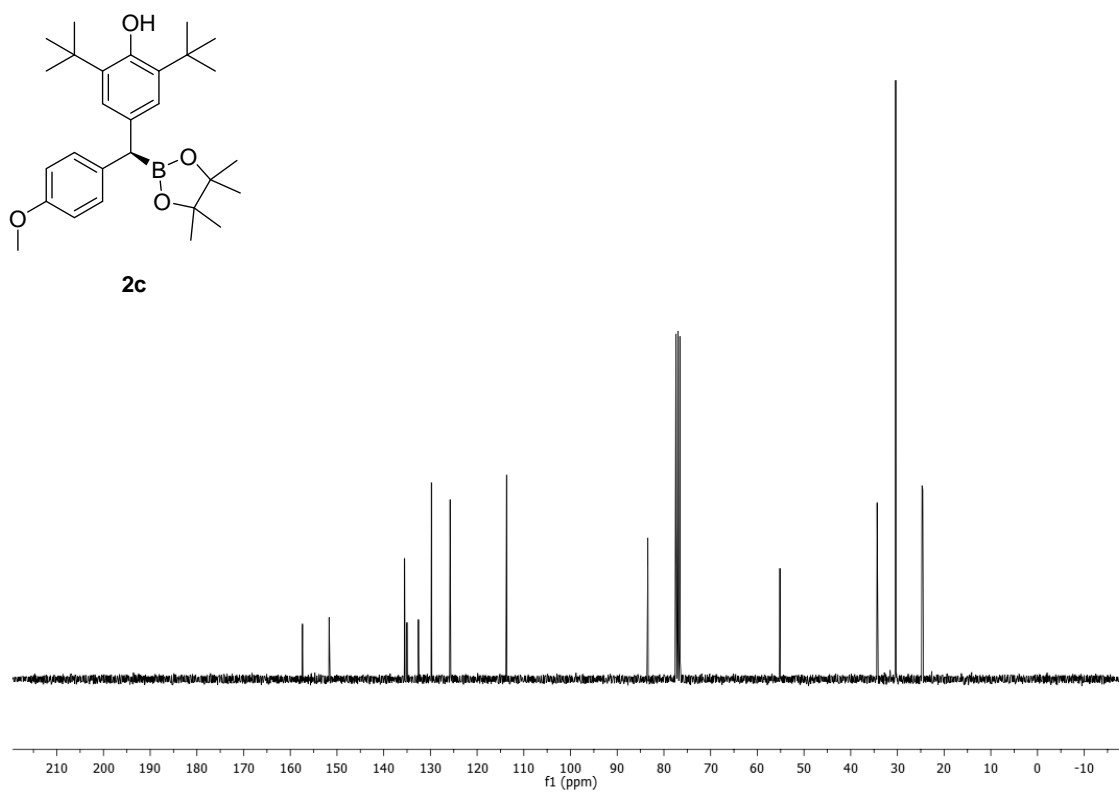

Figure S22: Spectra of compound 2c.



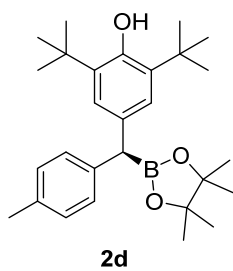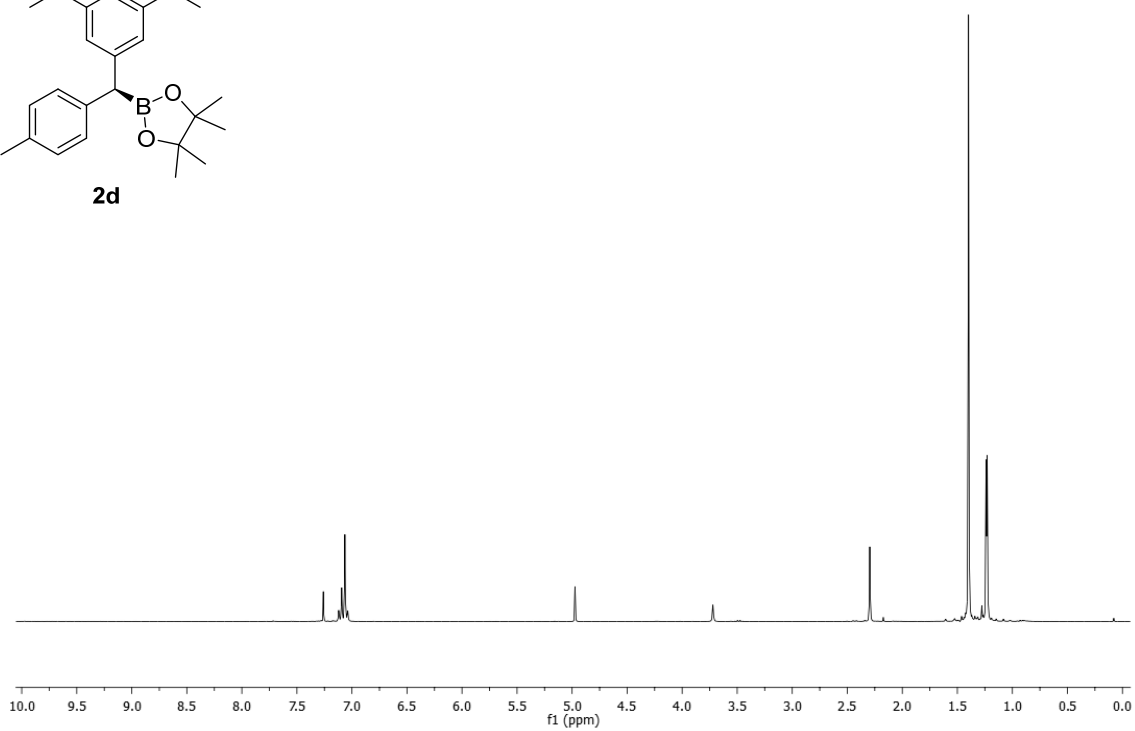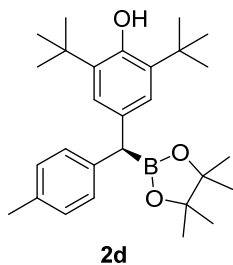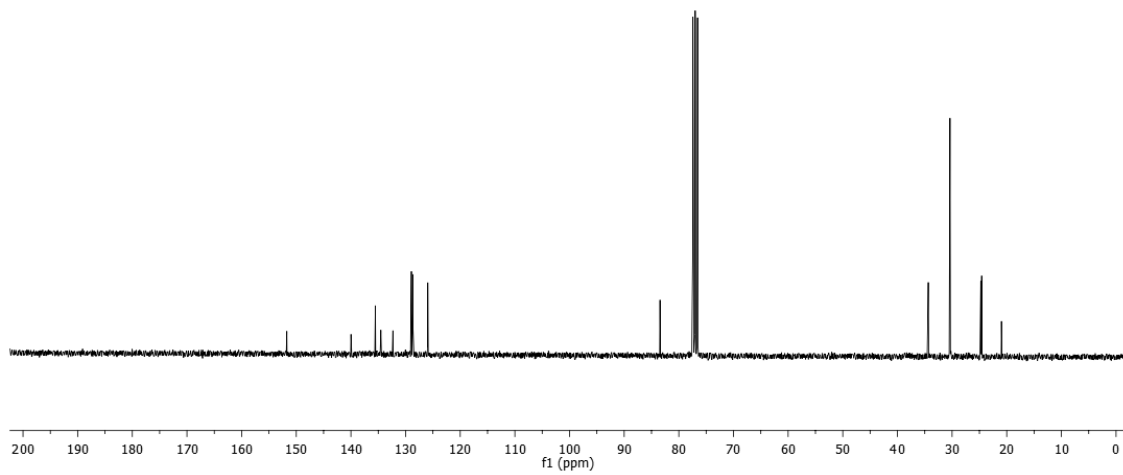

Figure S23: Spectra of compound **2d**.

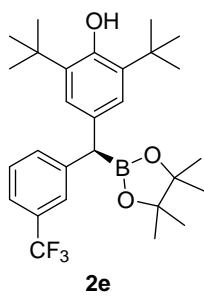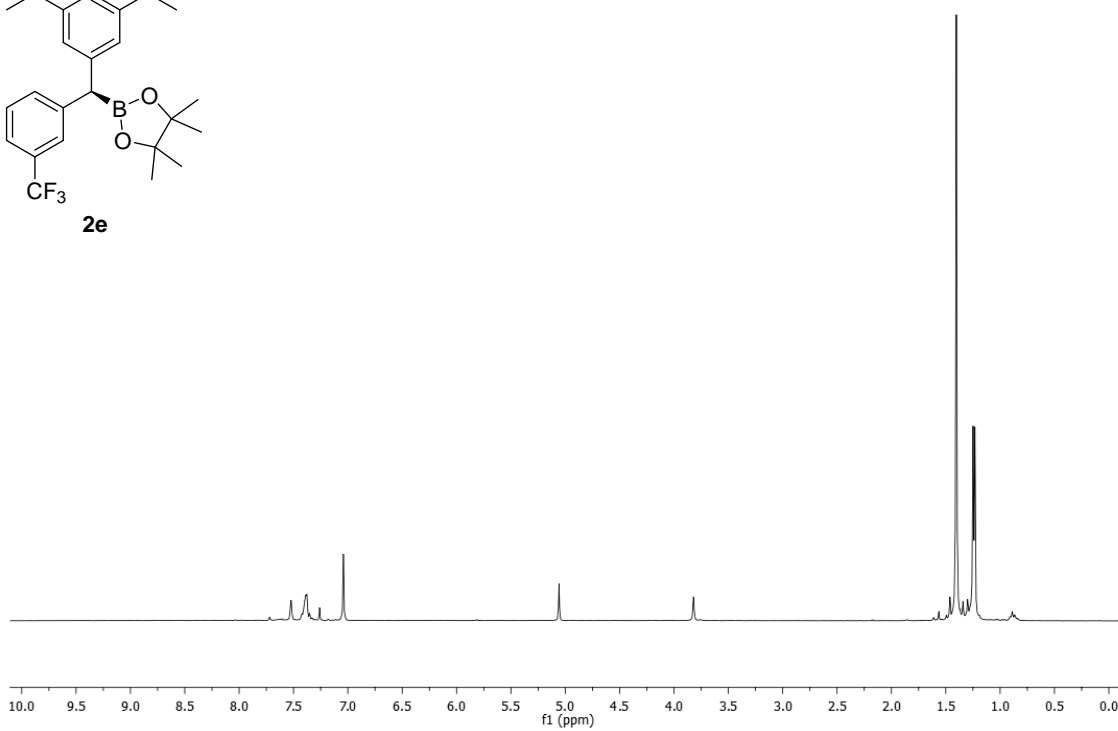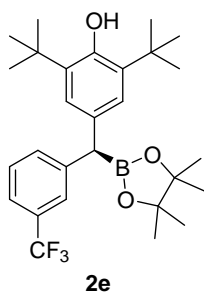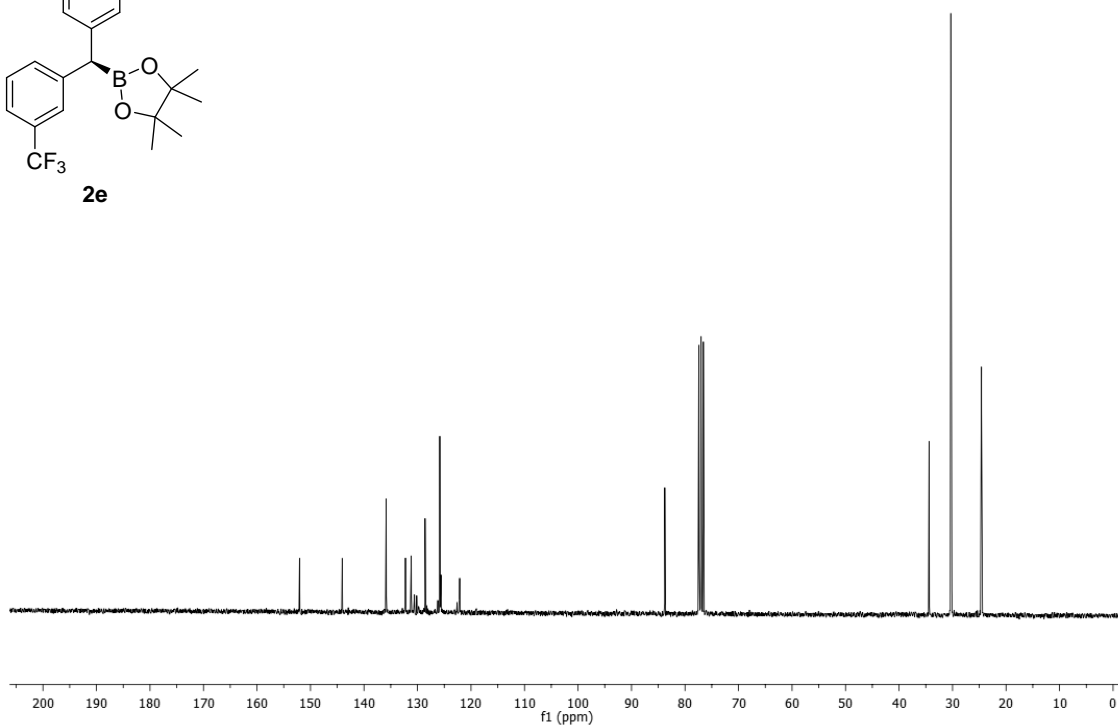

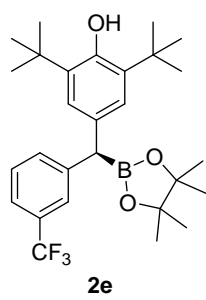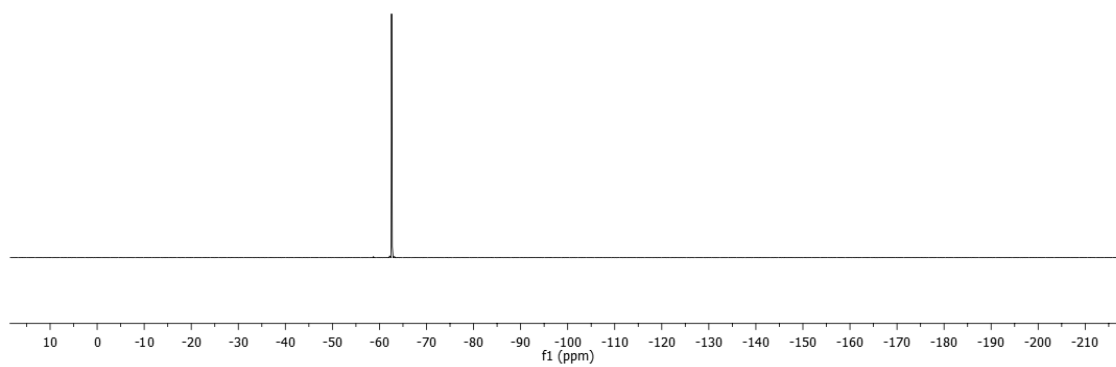

Figure S24: Spectra of compound **2e**.

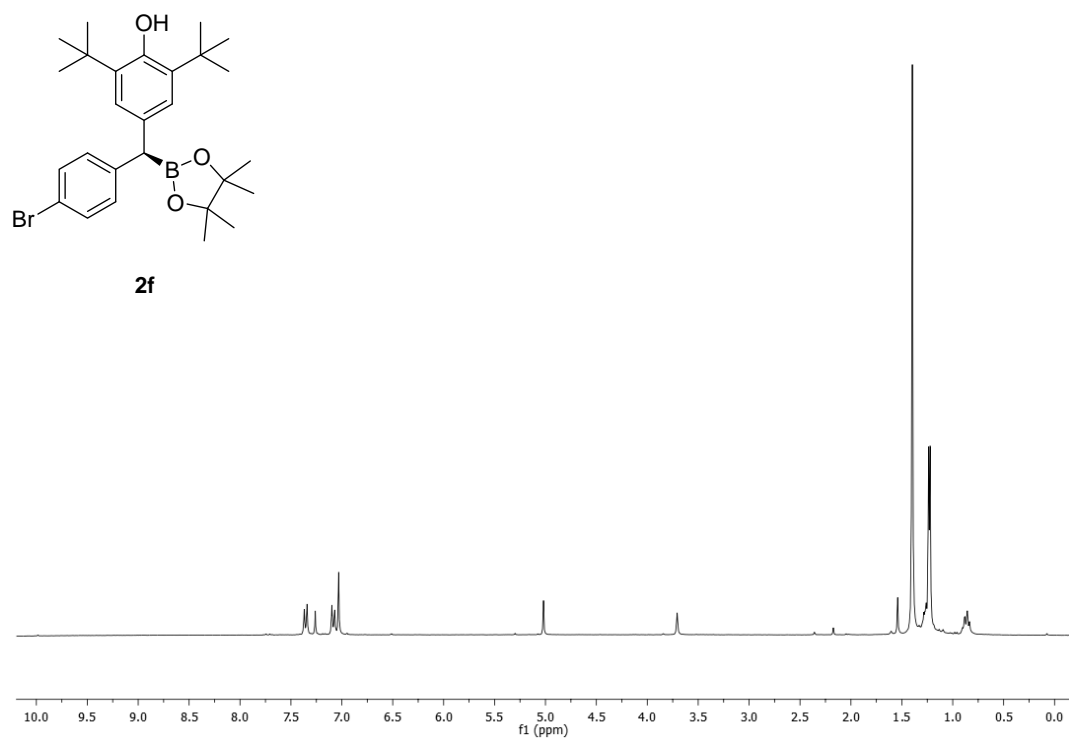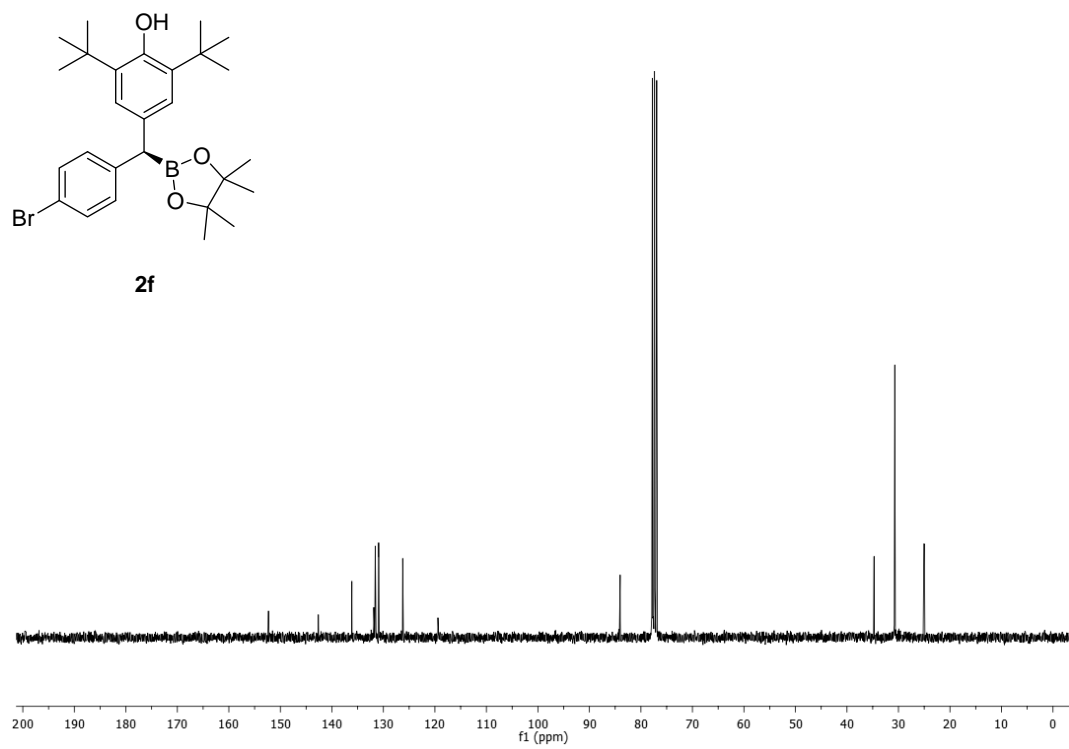

Figure S25: Spectra of compound **2f**.

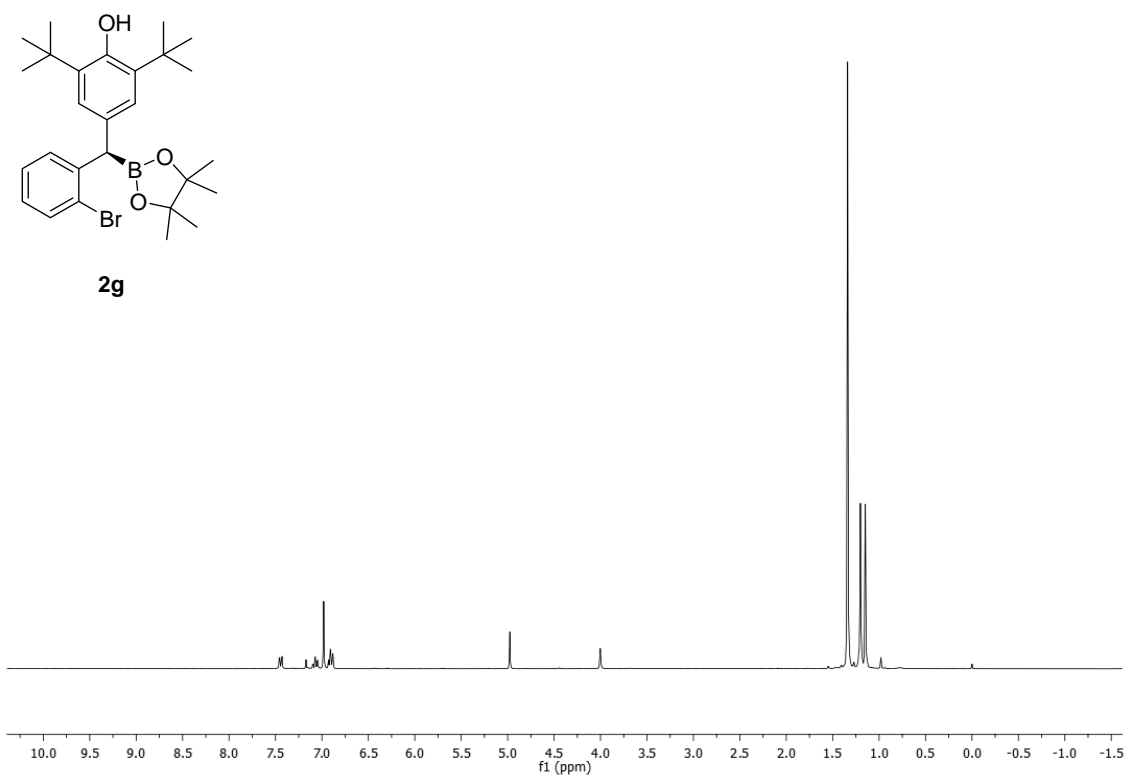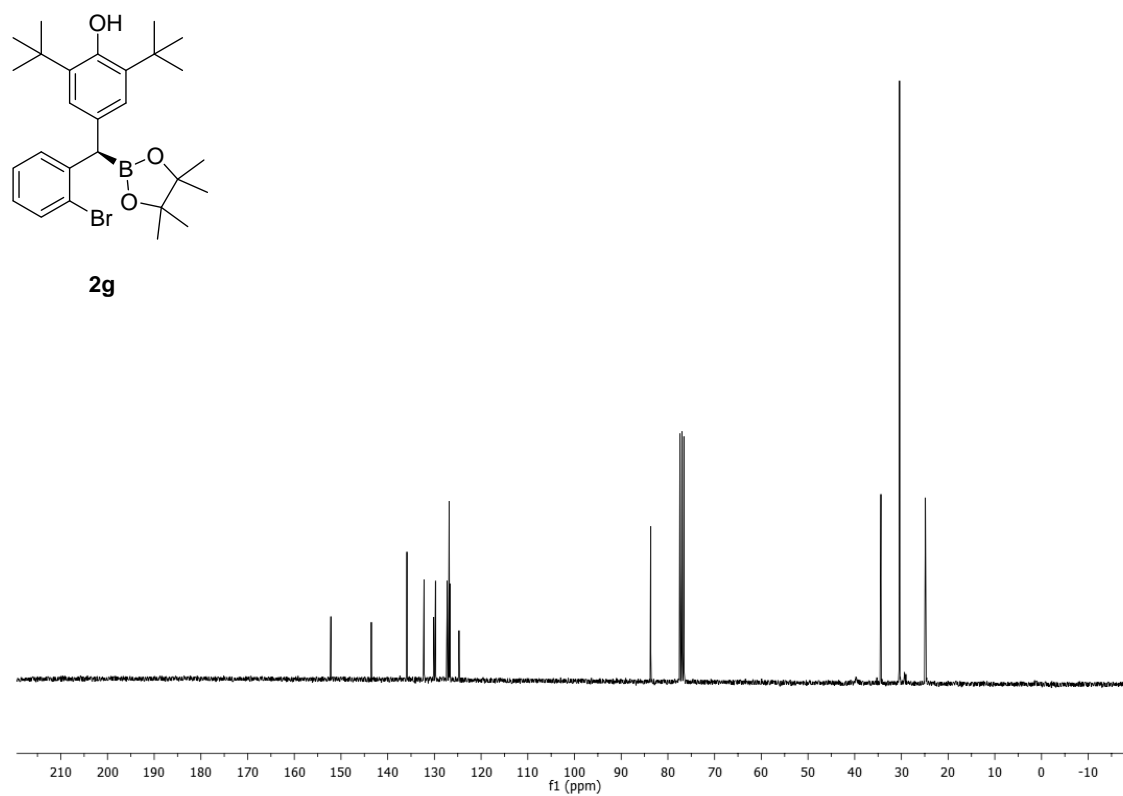

Figure S26: Spectra of compound **2g**.

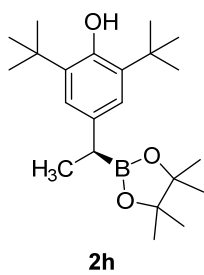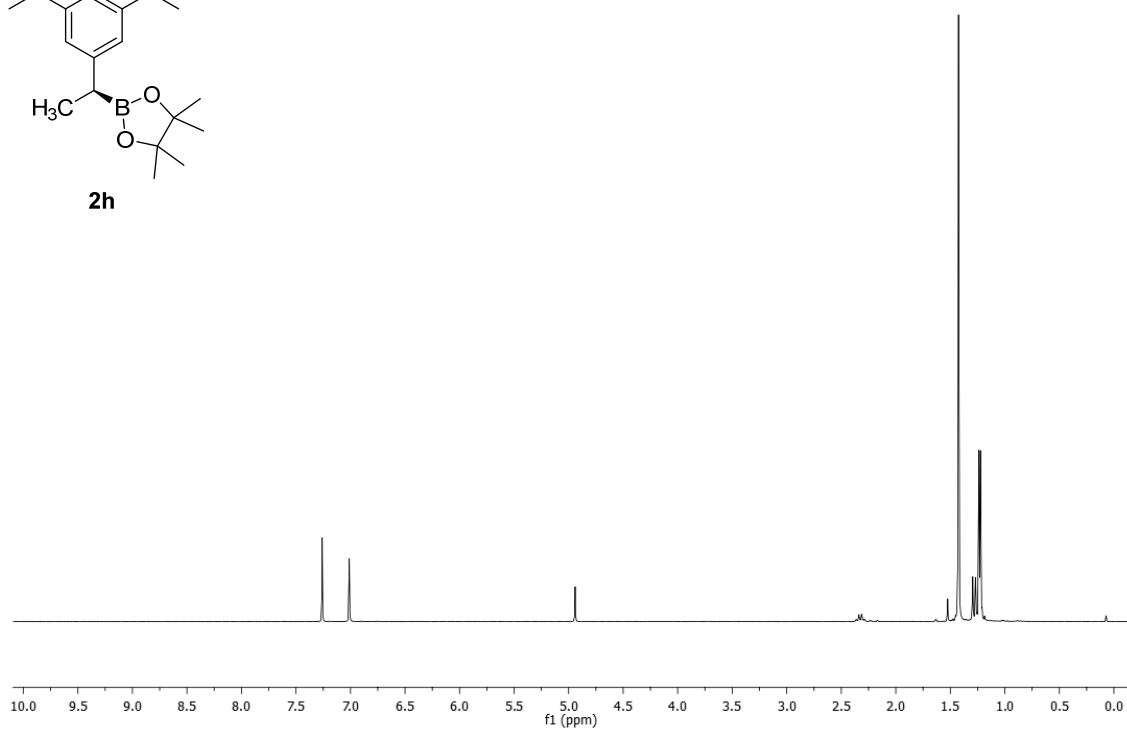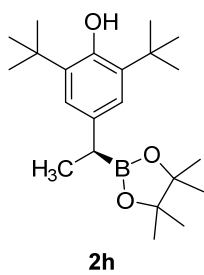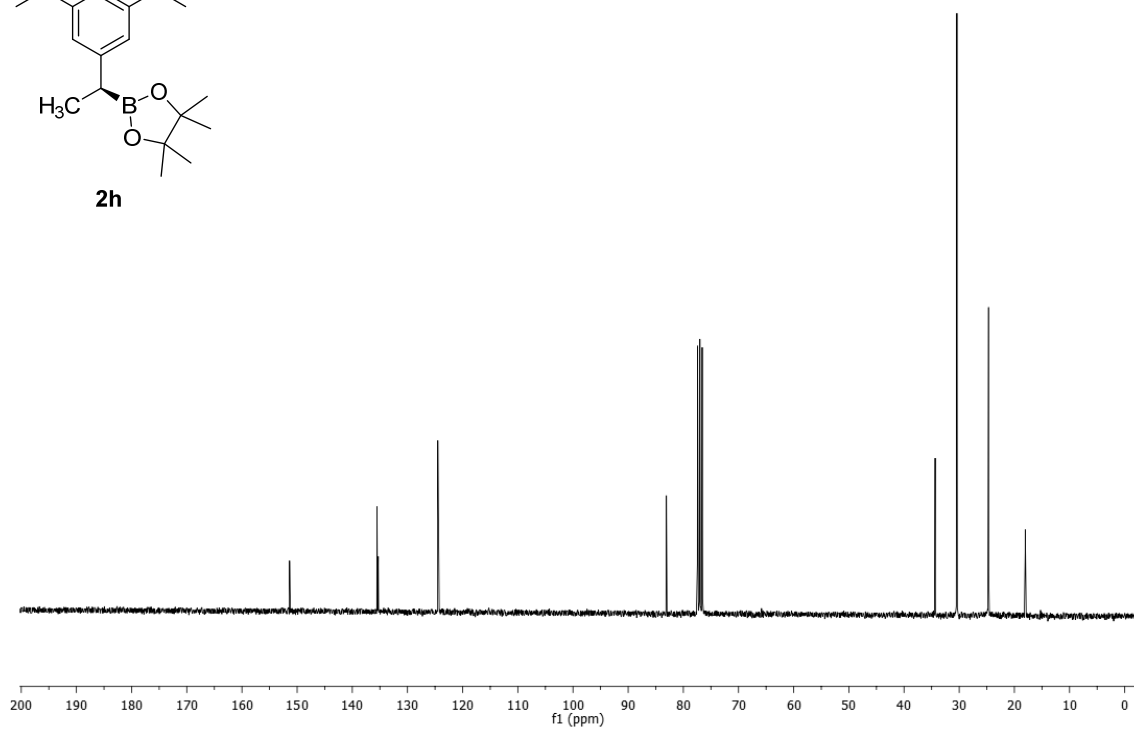

Figure S27: Spectra of compound **2h**.

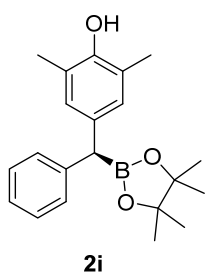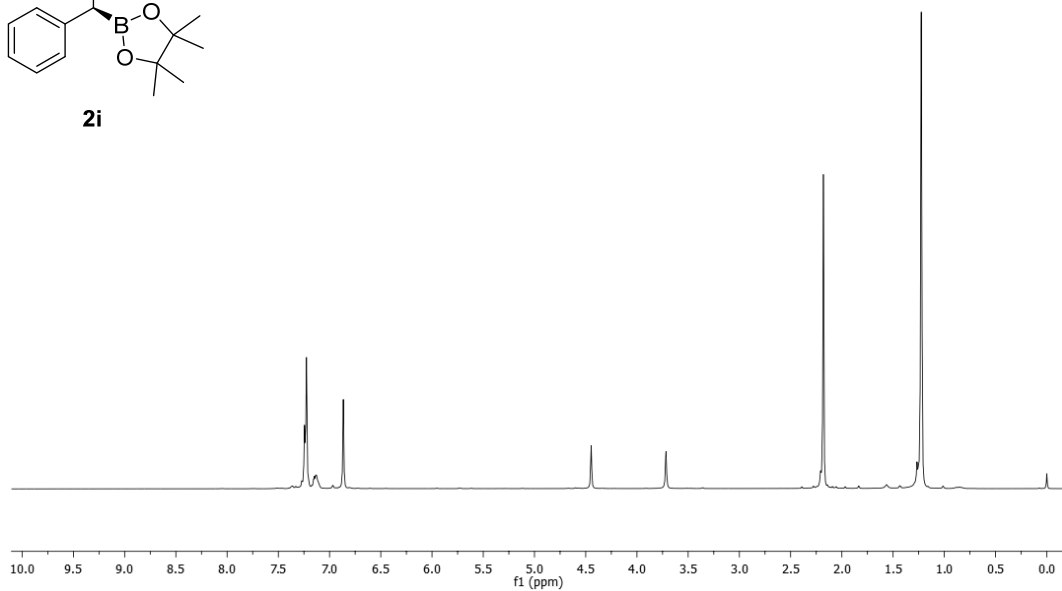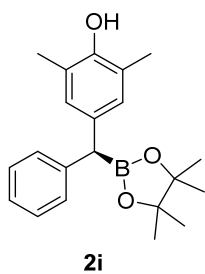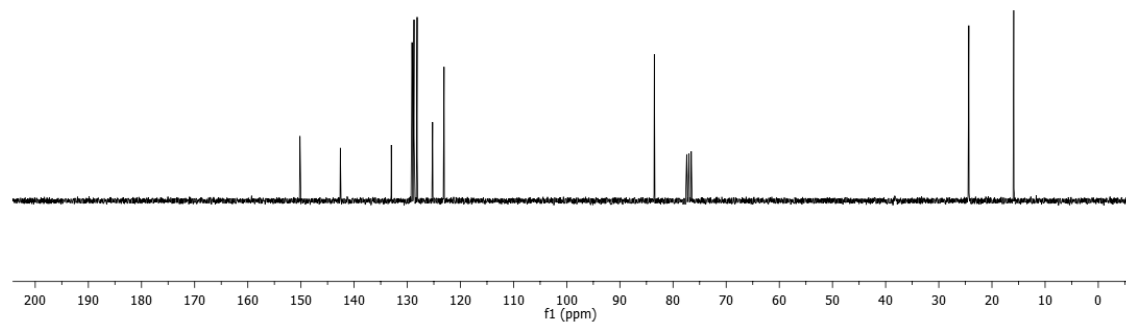

Figure S28: Spectra of compound **2i**.

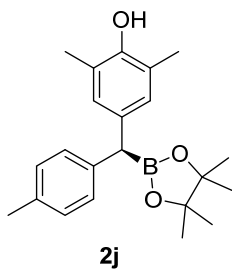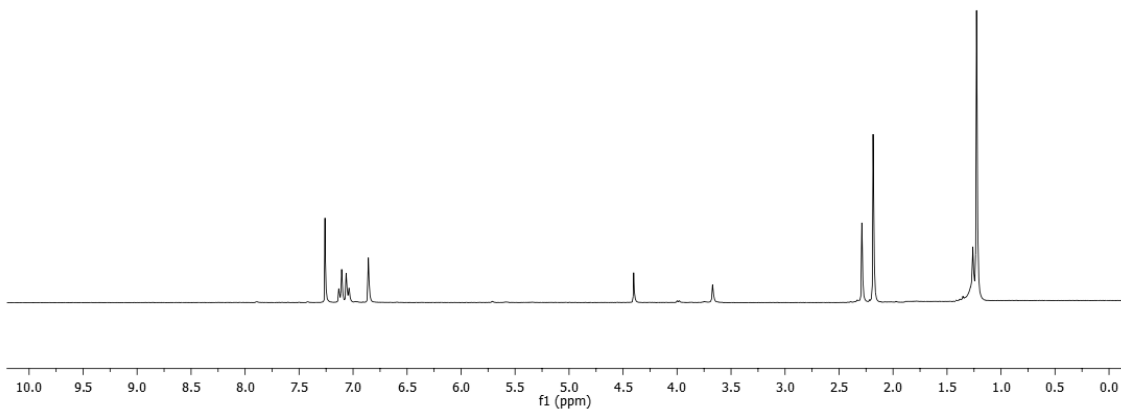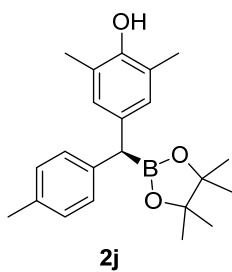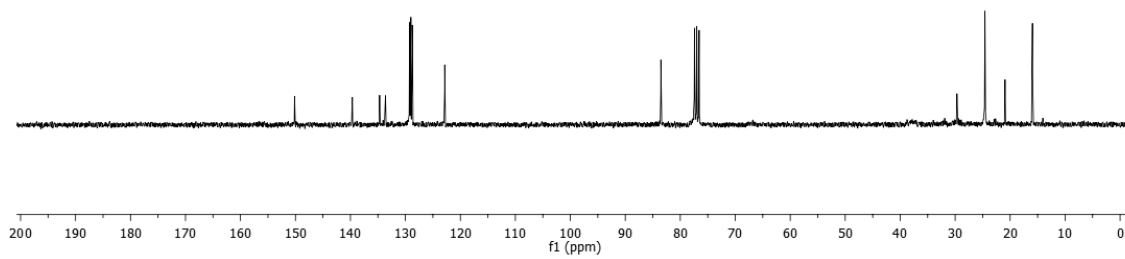

Figure S29: Spectra of compound **2j**.



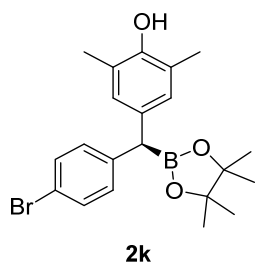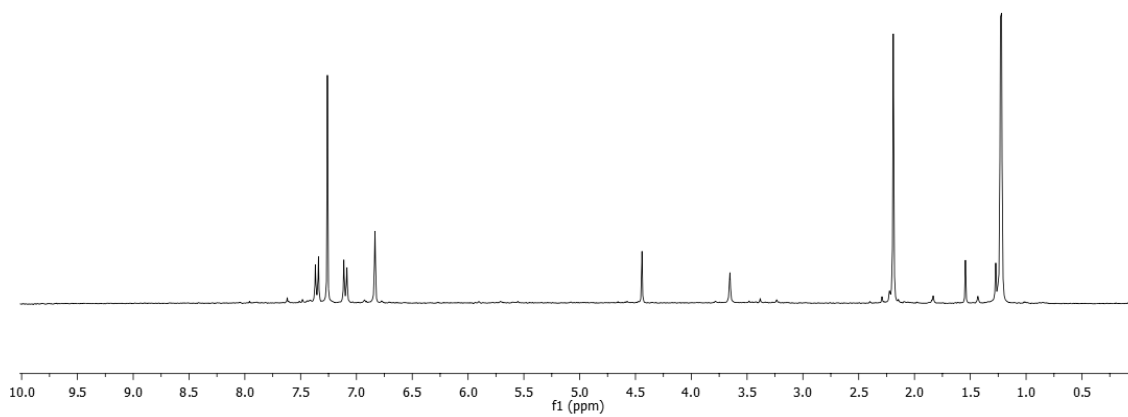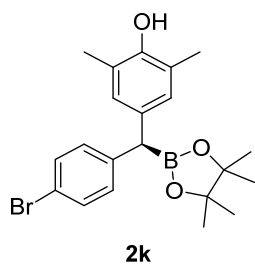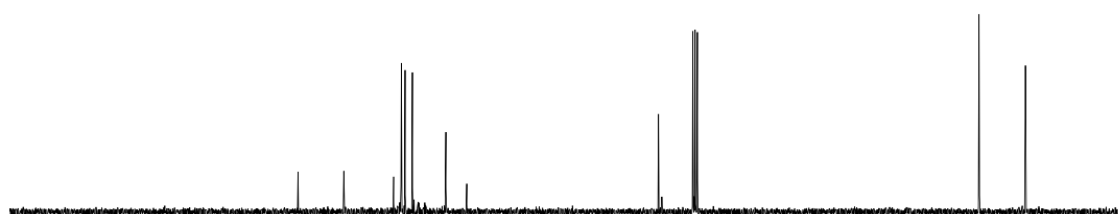

Figure S30: Spectra of compound **2k**.

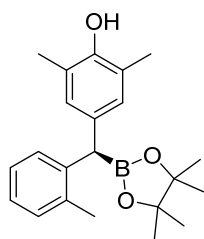

**21**

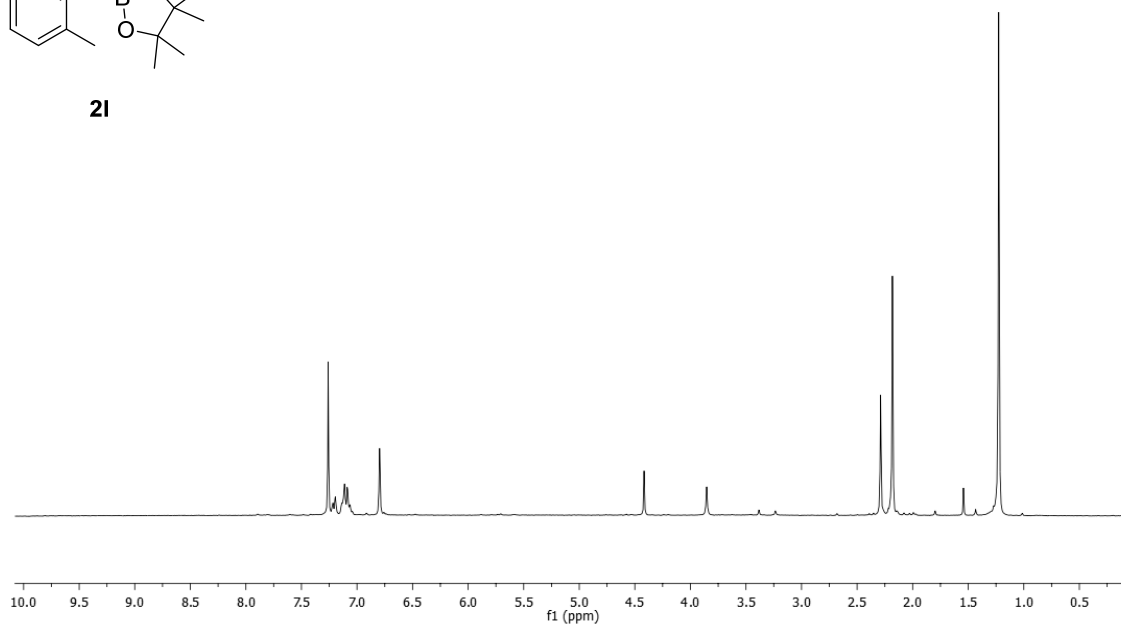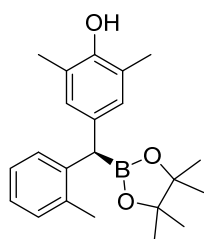

**21**

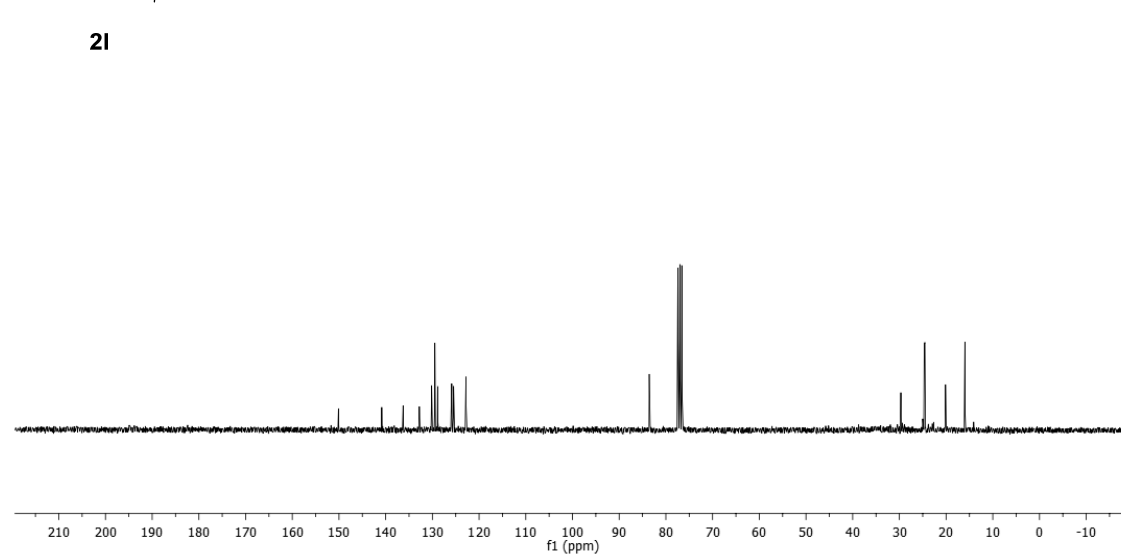

Figure S31: Spectra of compound **21**.

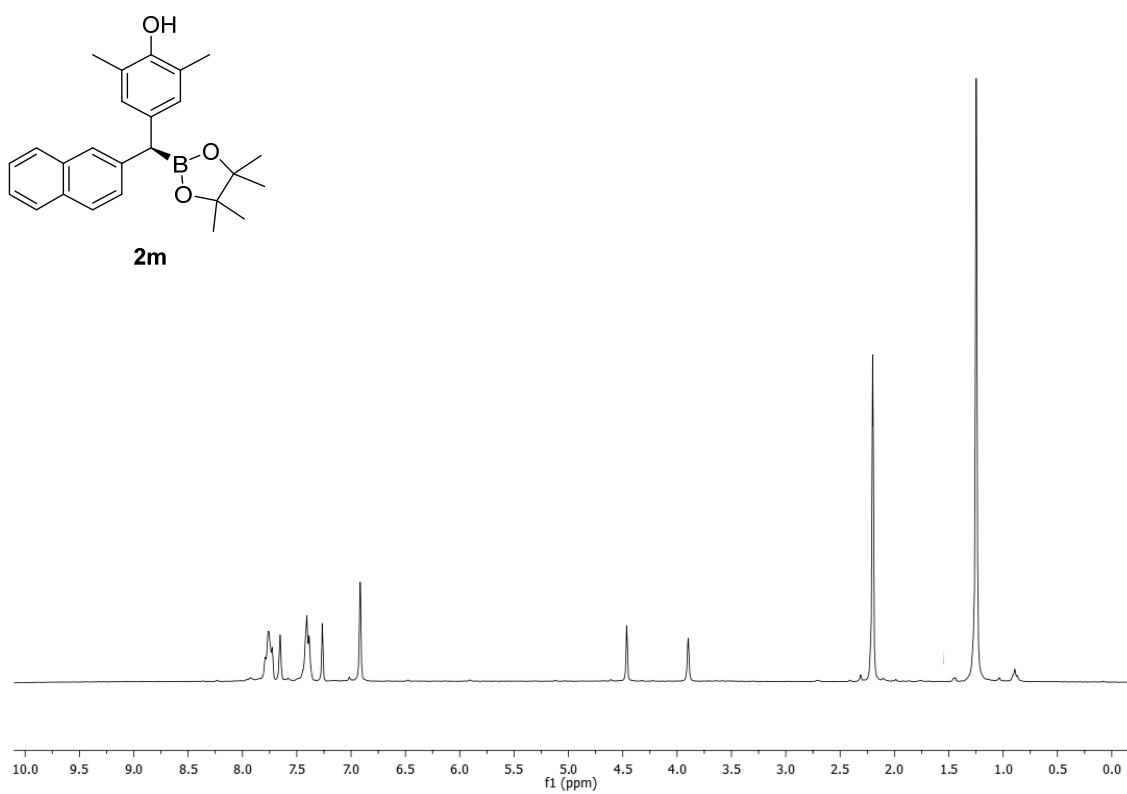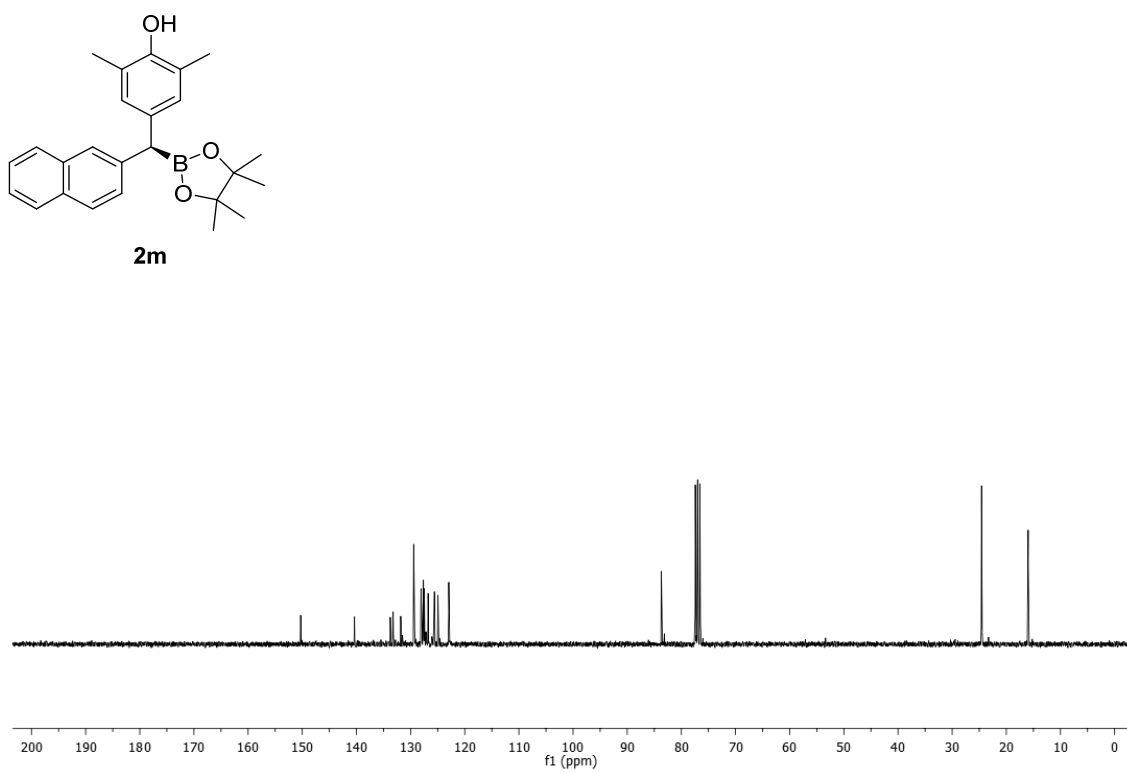

Figure S32: Spectra of compound **2m**.

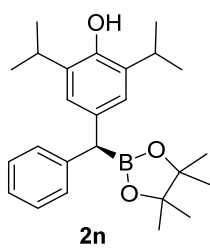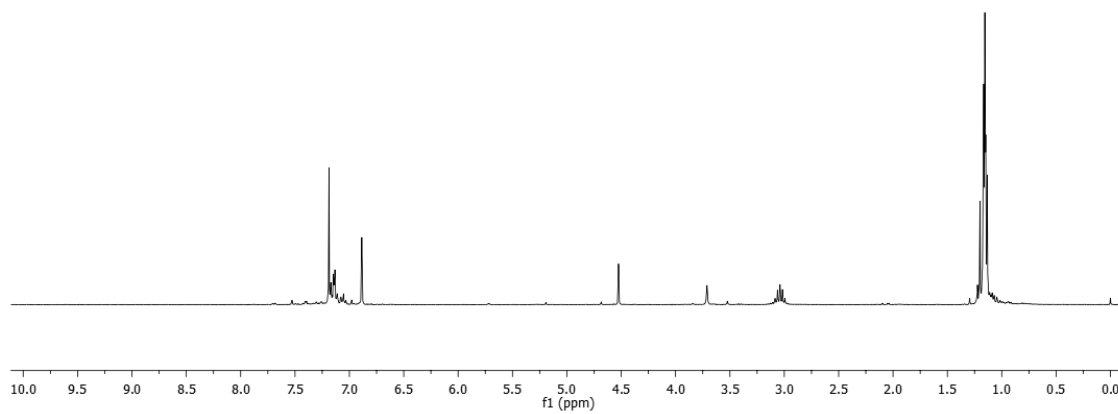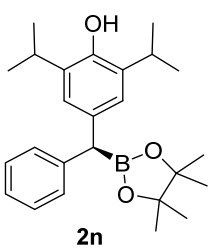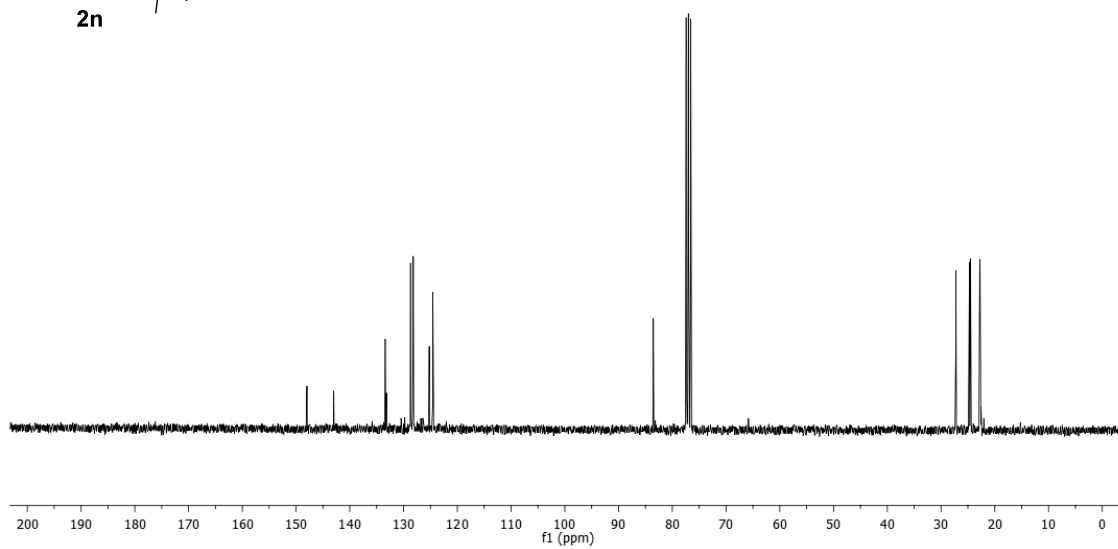

Figure S33: Spectra of compound **2n**.

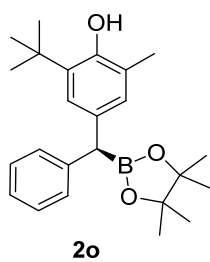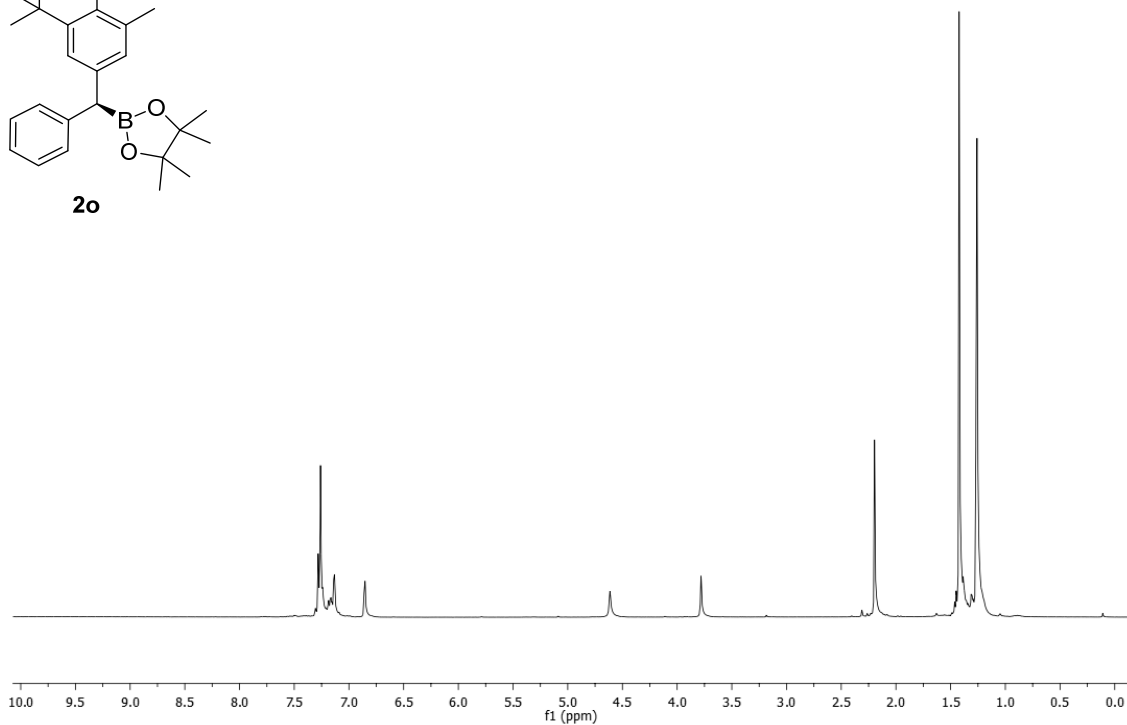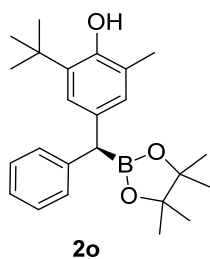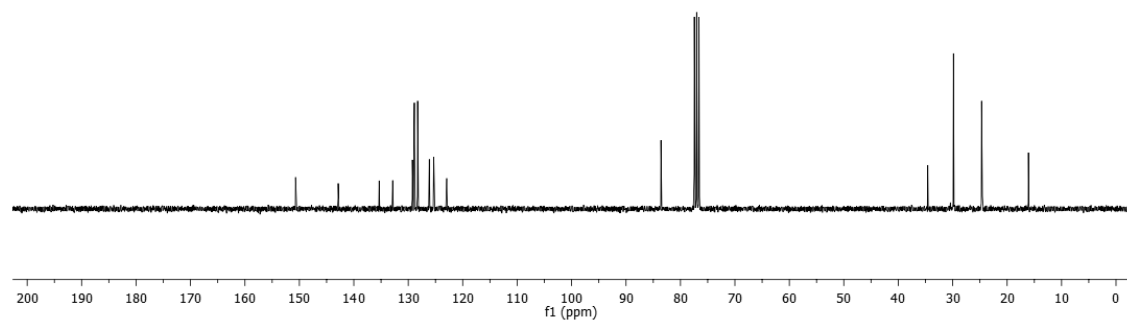

Figure S34: Spectra of compound **2o**.

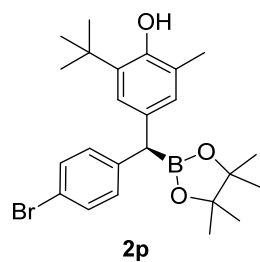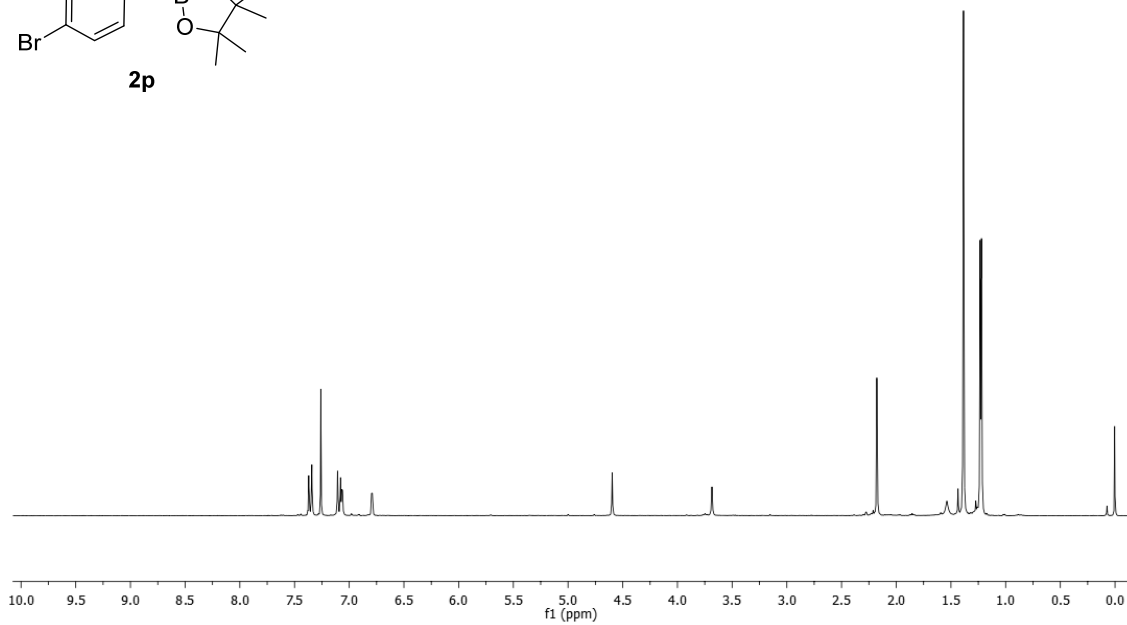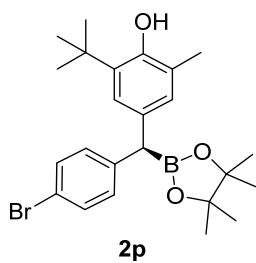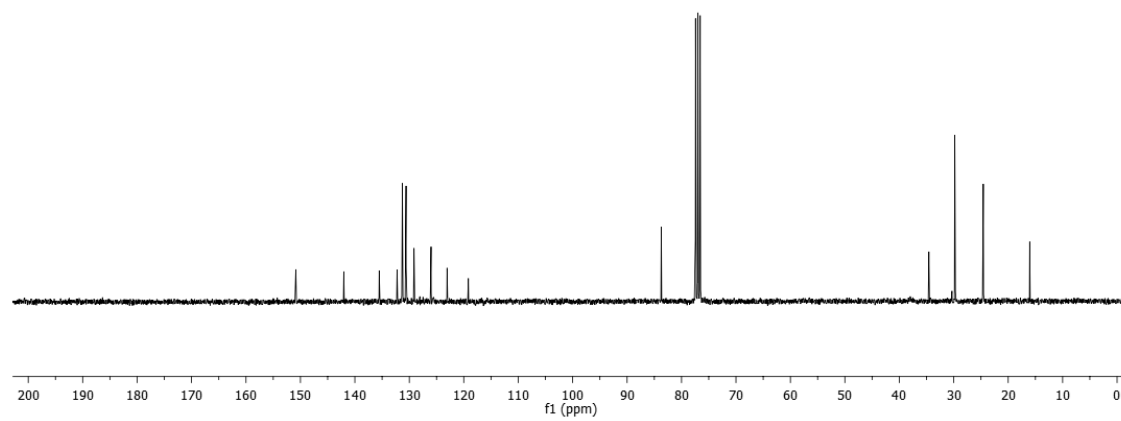

Figure S35: Spectra of compound **2p**.

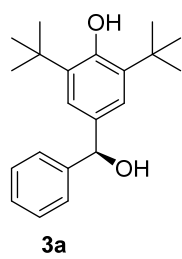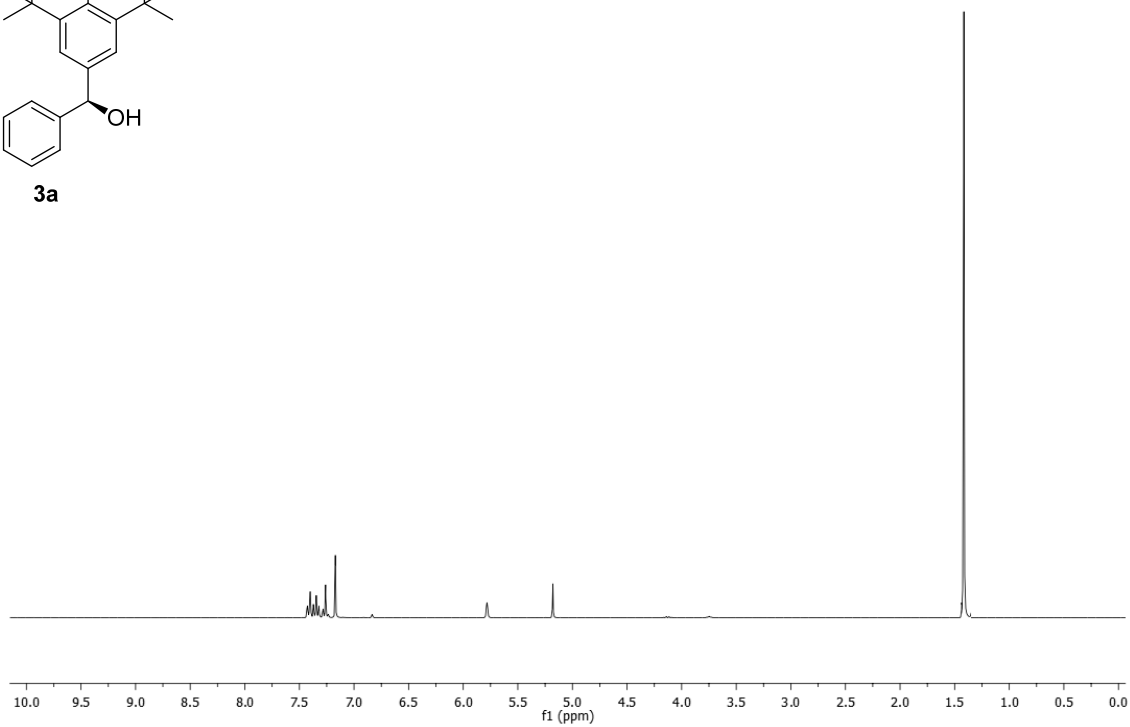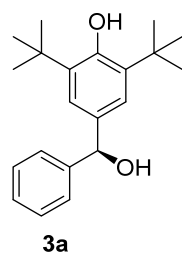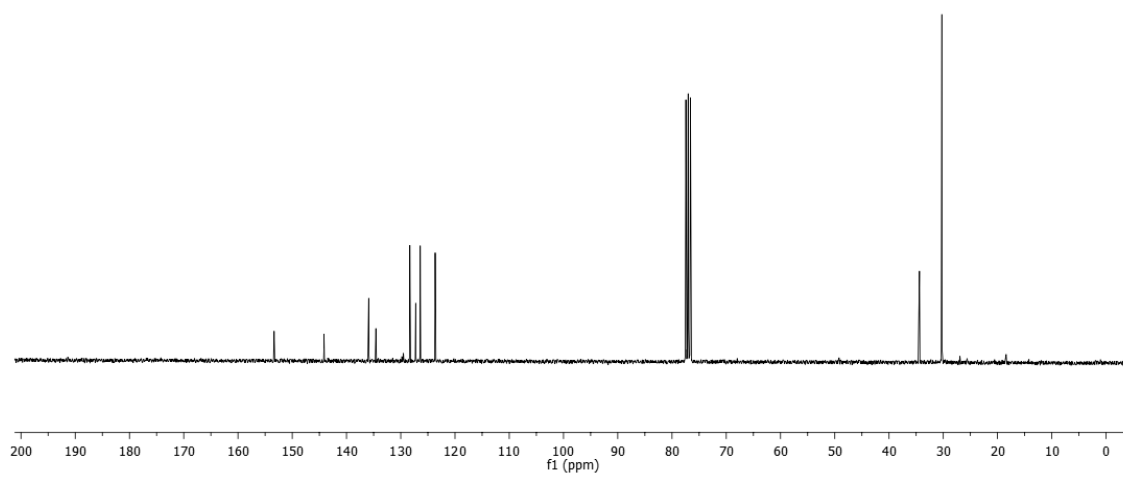

Figure S36: Spectra of compound **3a**.

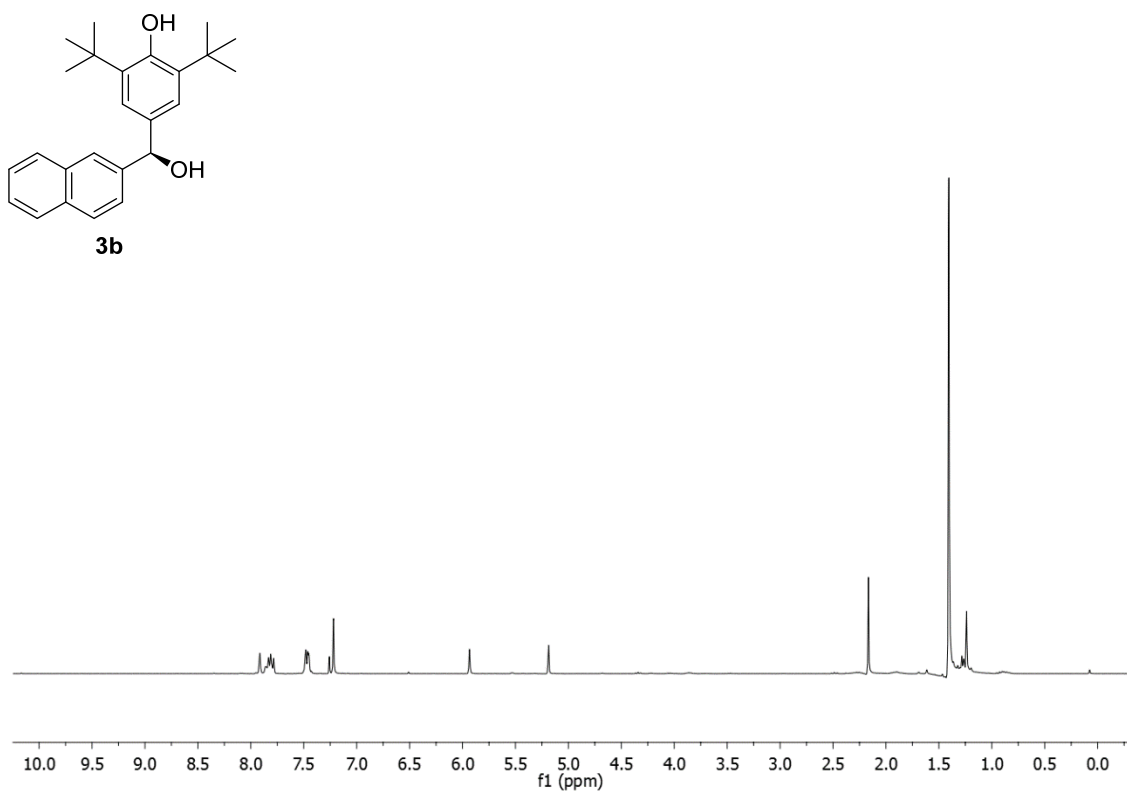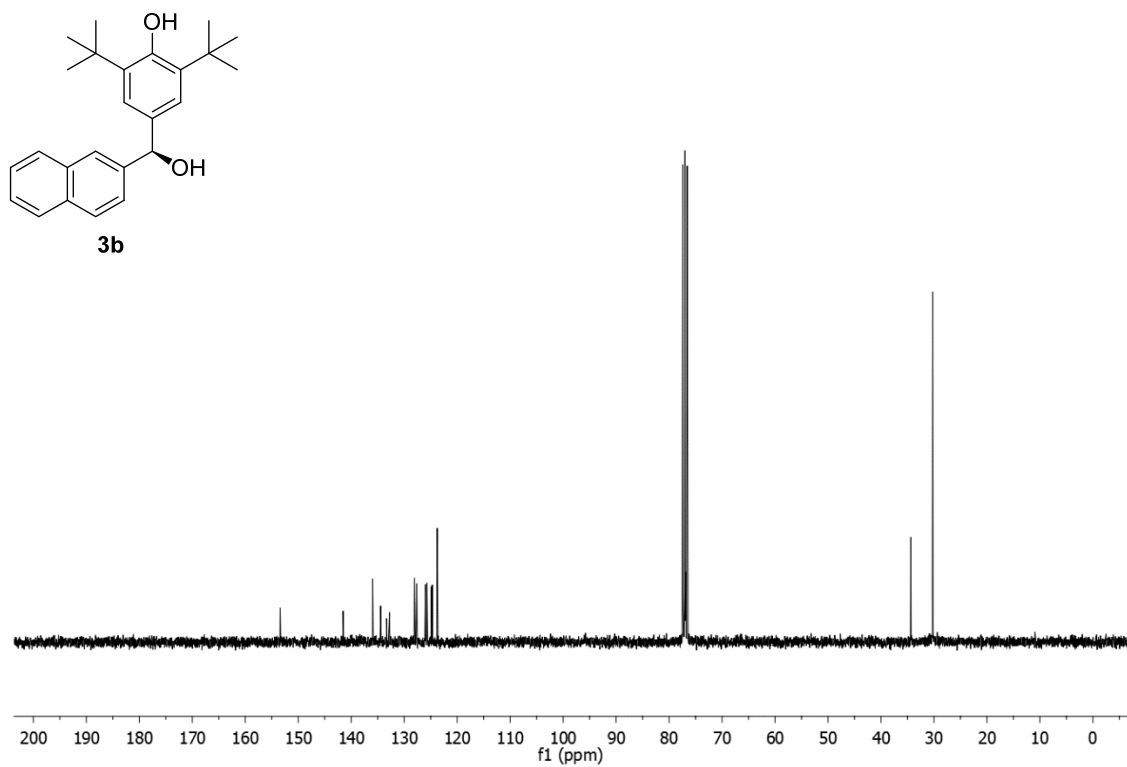

Figure S37: Spectra of compound **3b**.



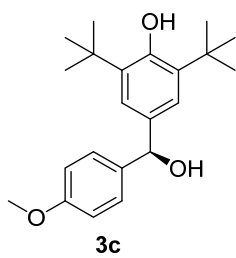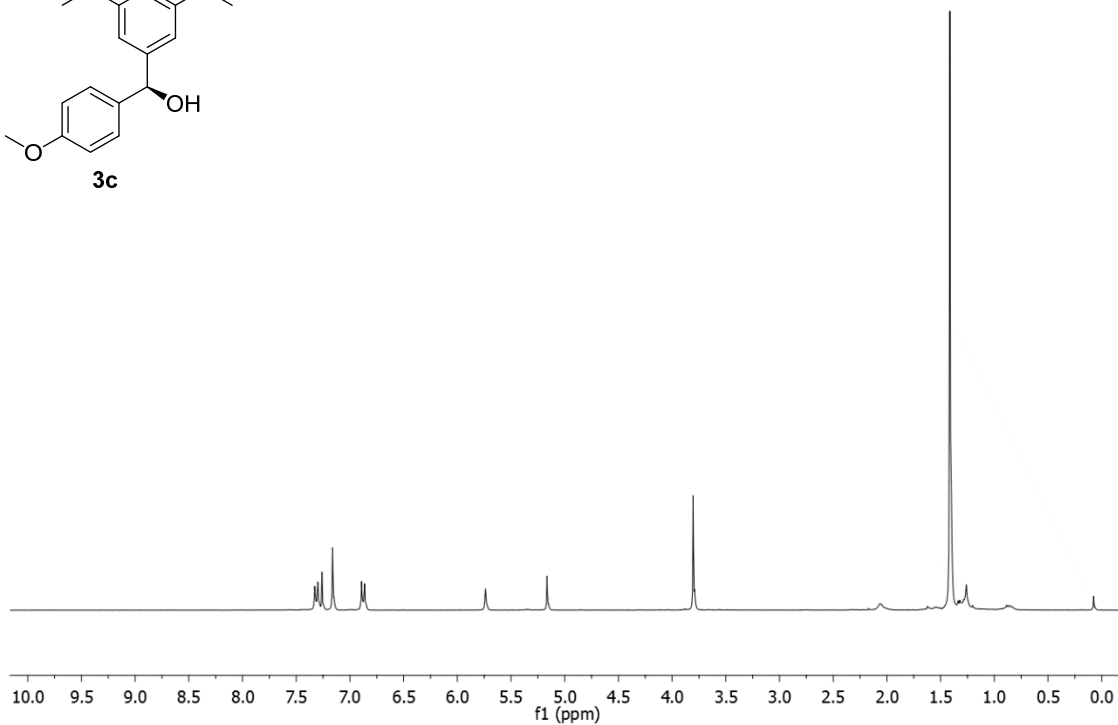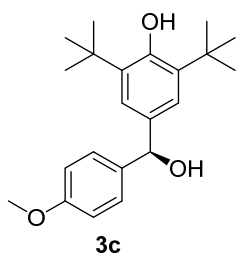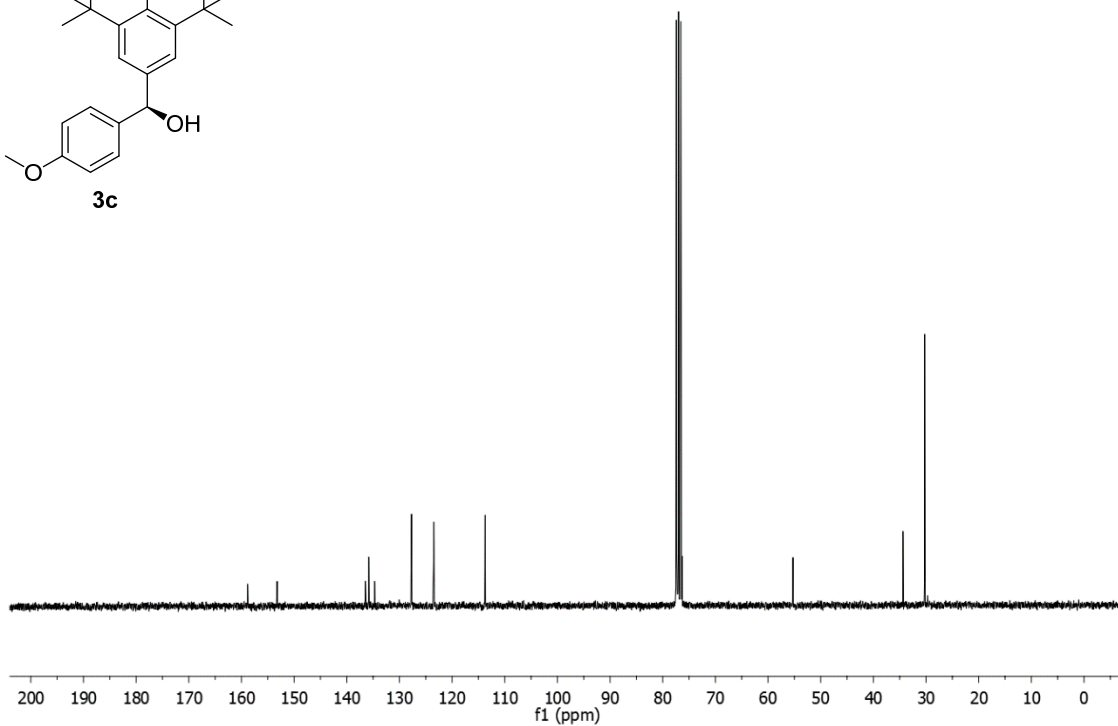

Figure S38: Spectra of compound **3c**.

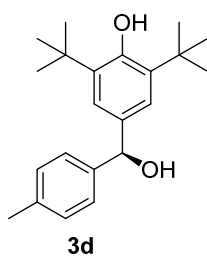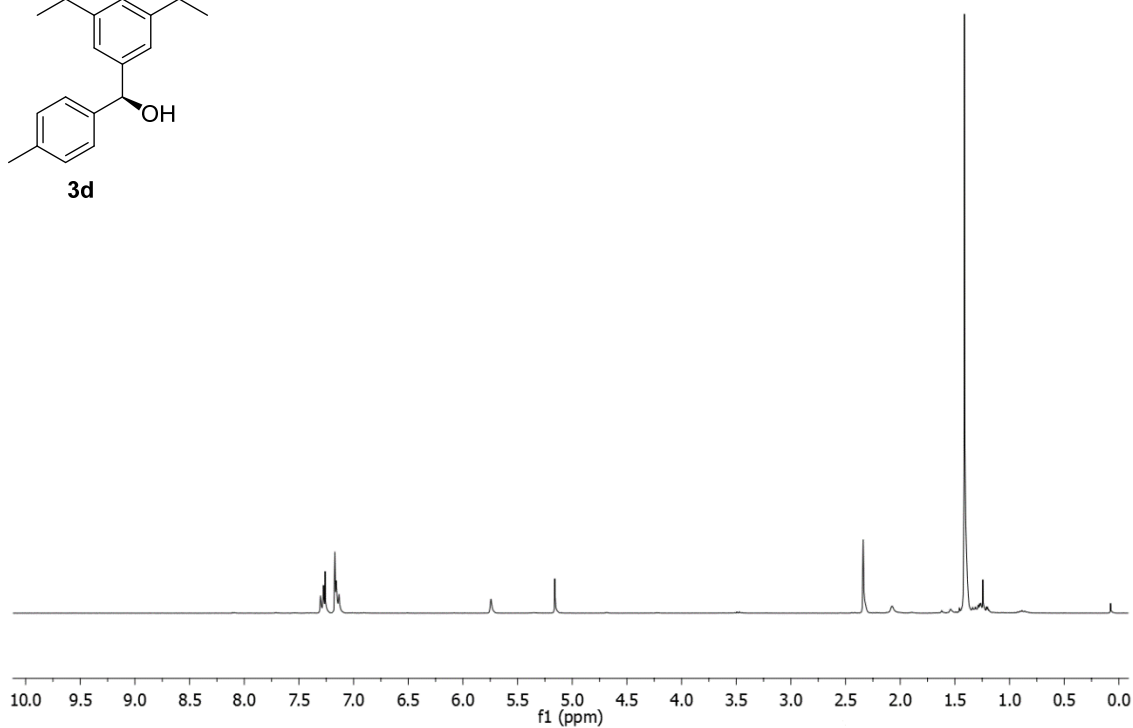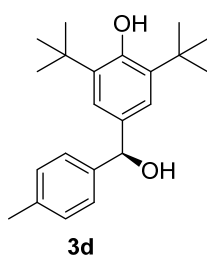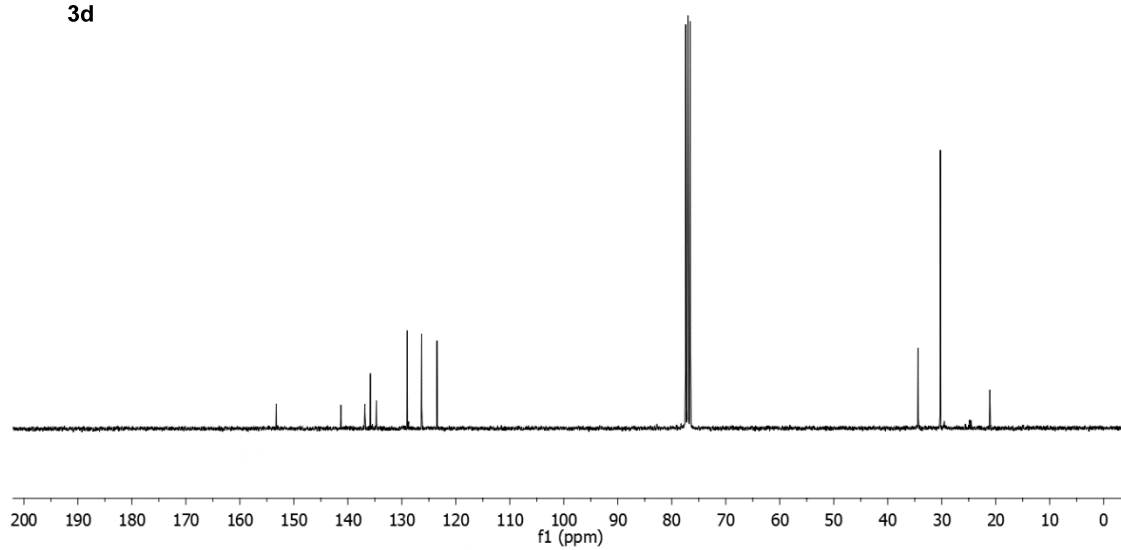

Figure S39: Spectra of compound **3d**.

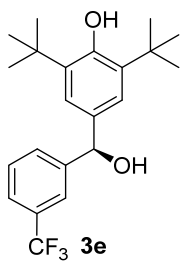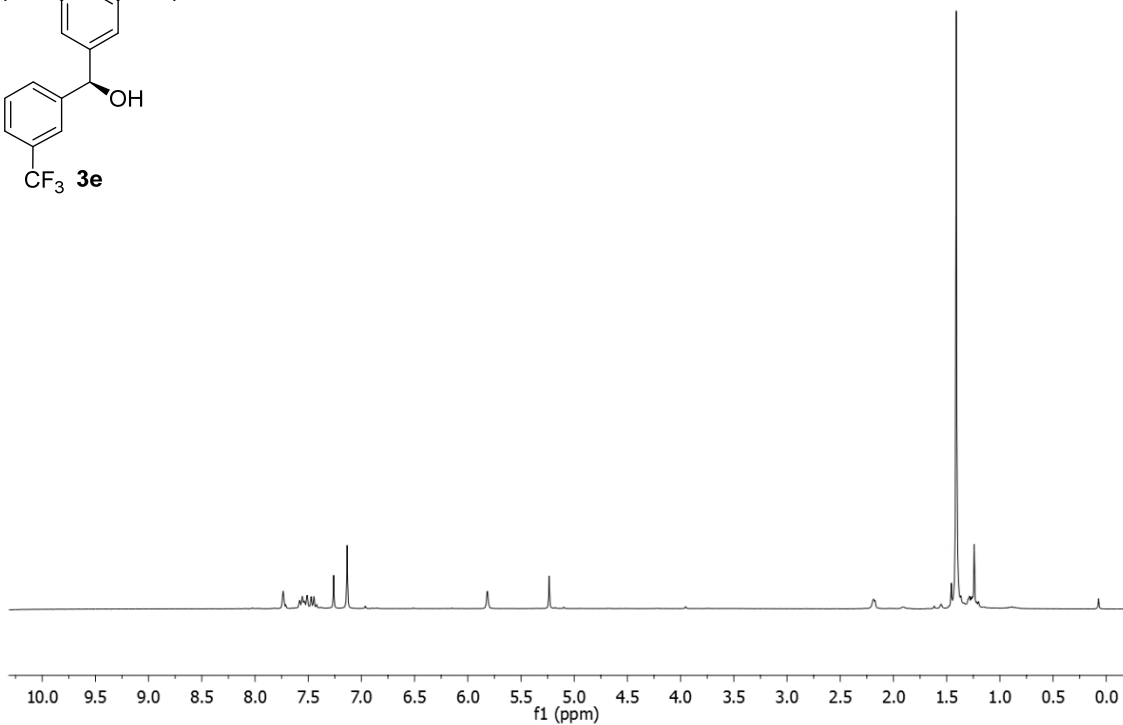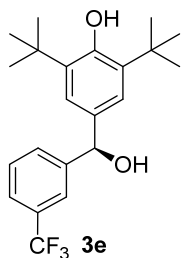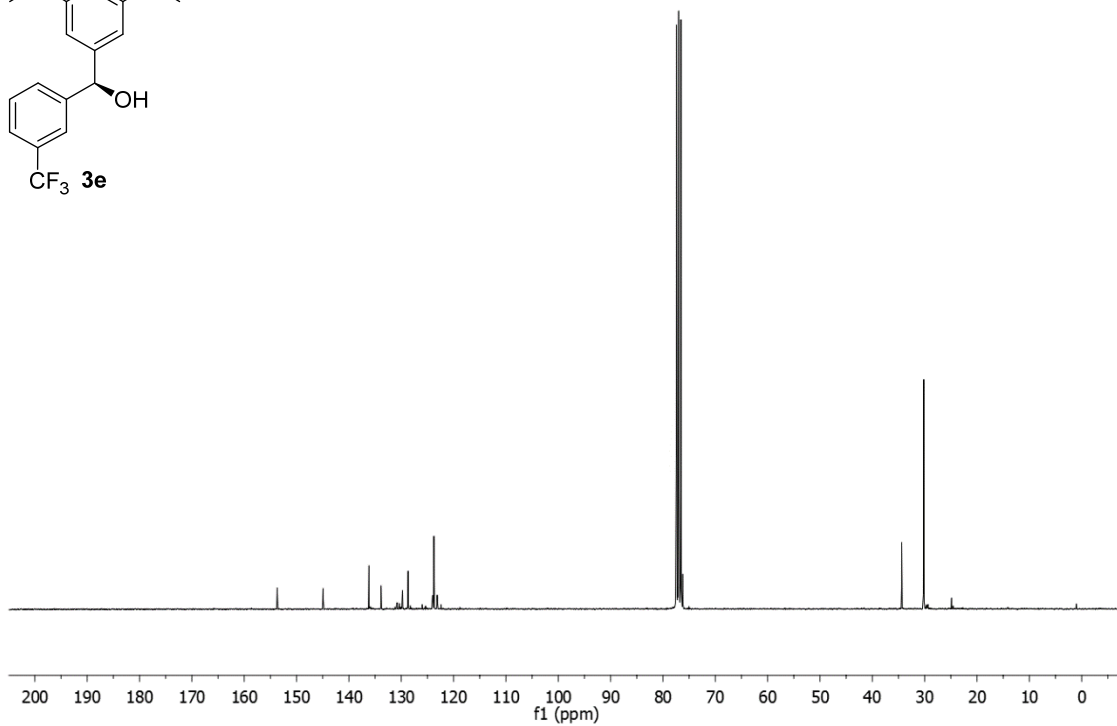

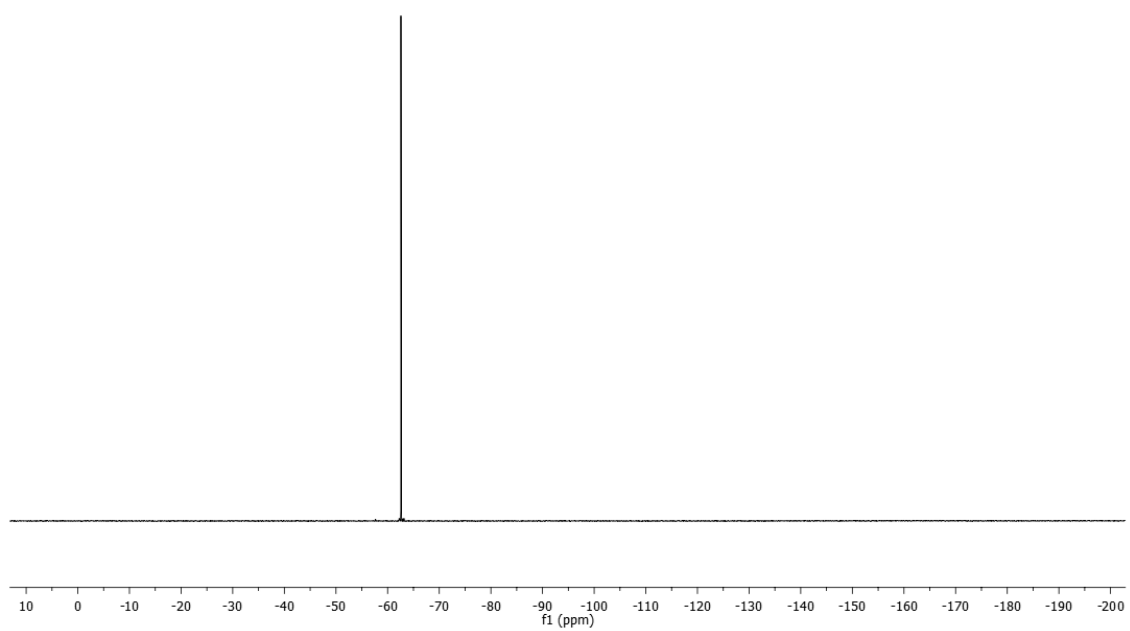

Figure S40: Spectra of compound **3e**.

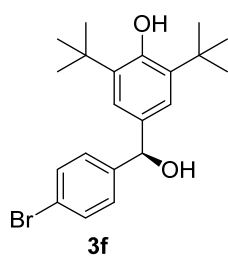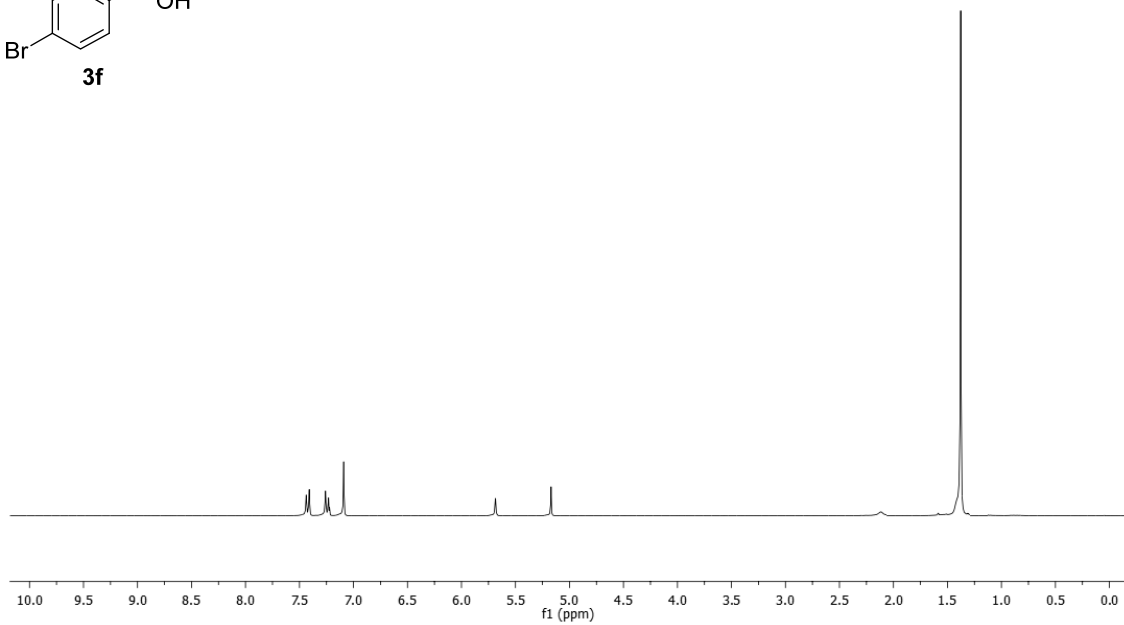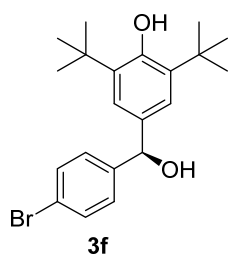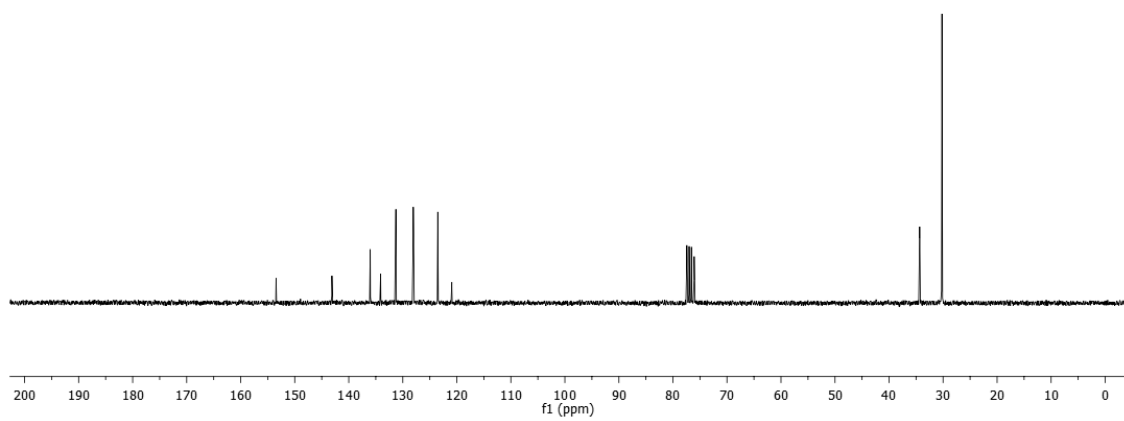

Figure S41: Spectra of compound **3f**.

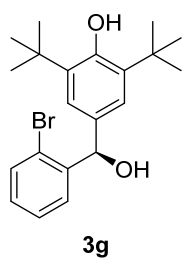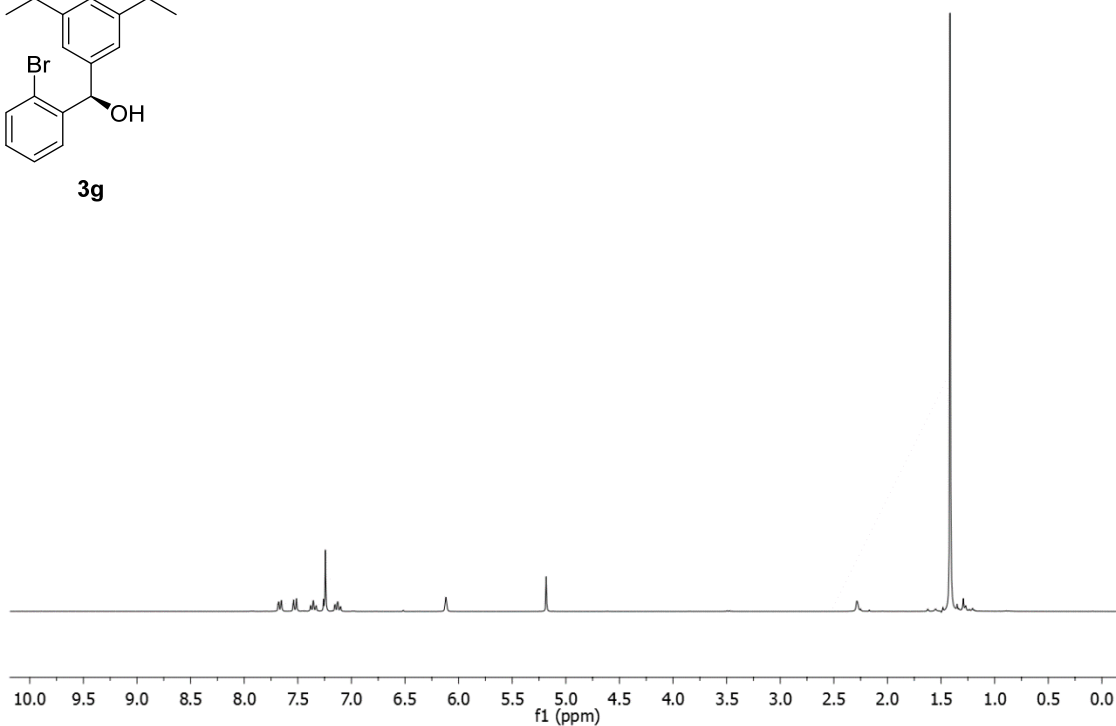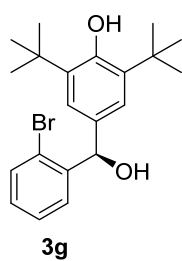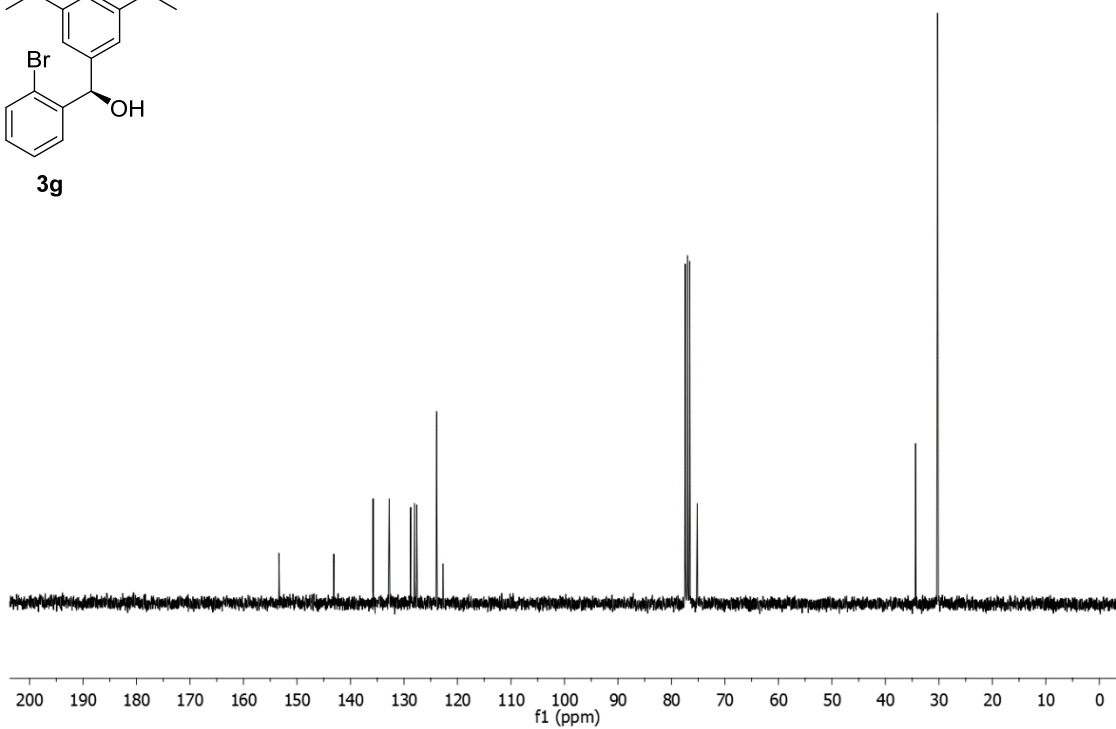

Figure S42: Spectra of compound **3g**.

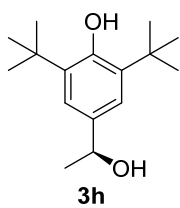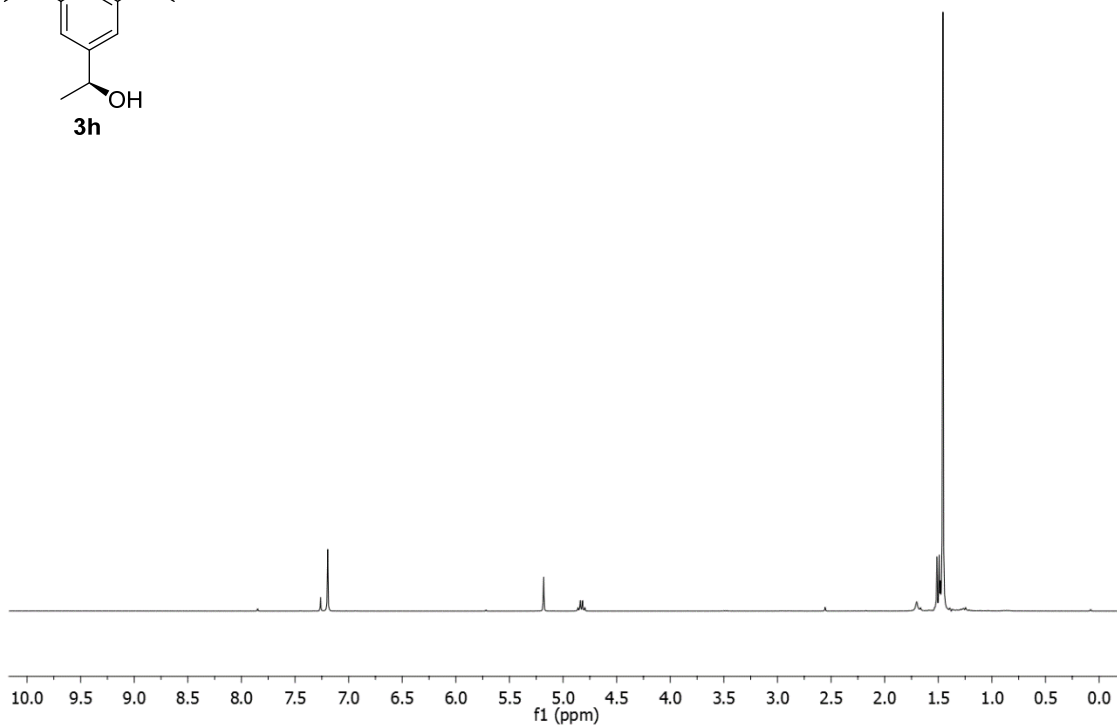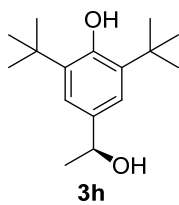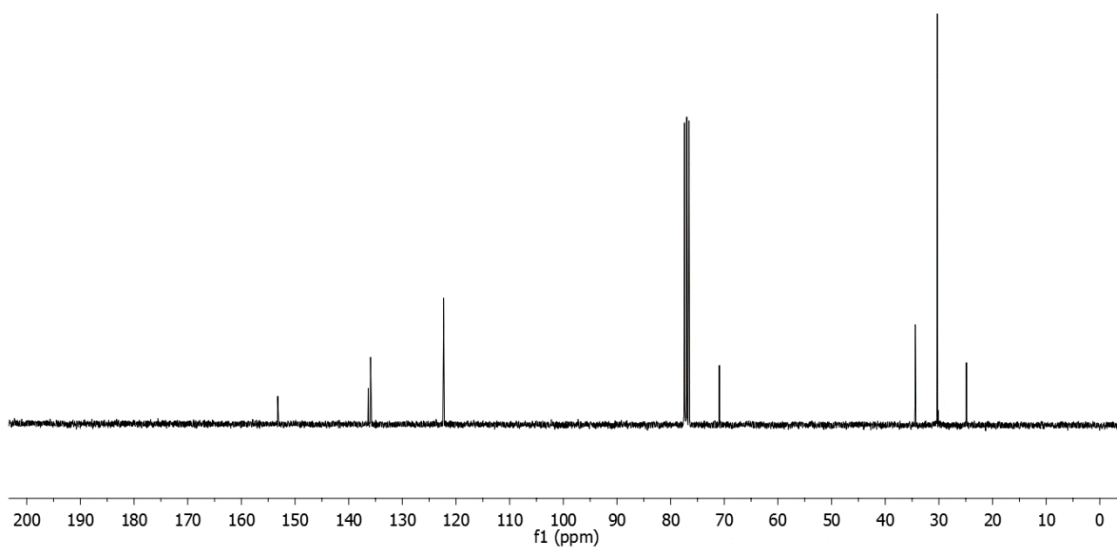

Figure S43: Spectra of compound **3h**.

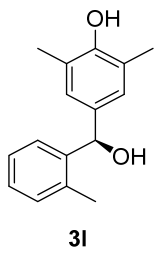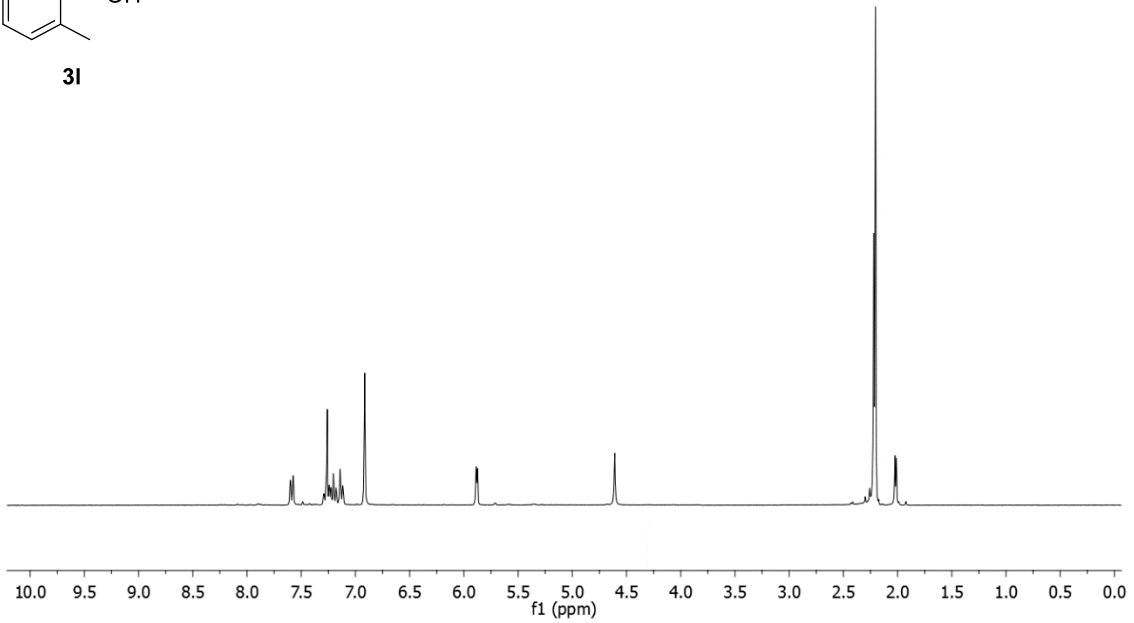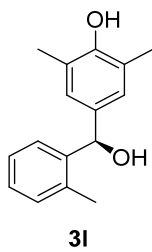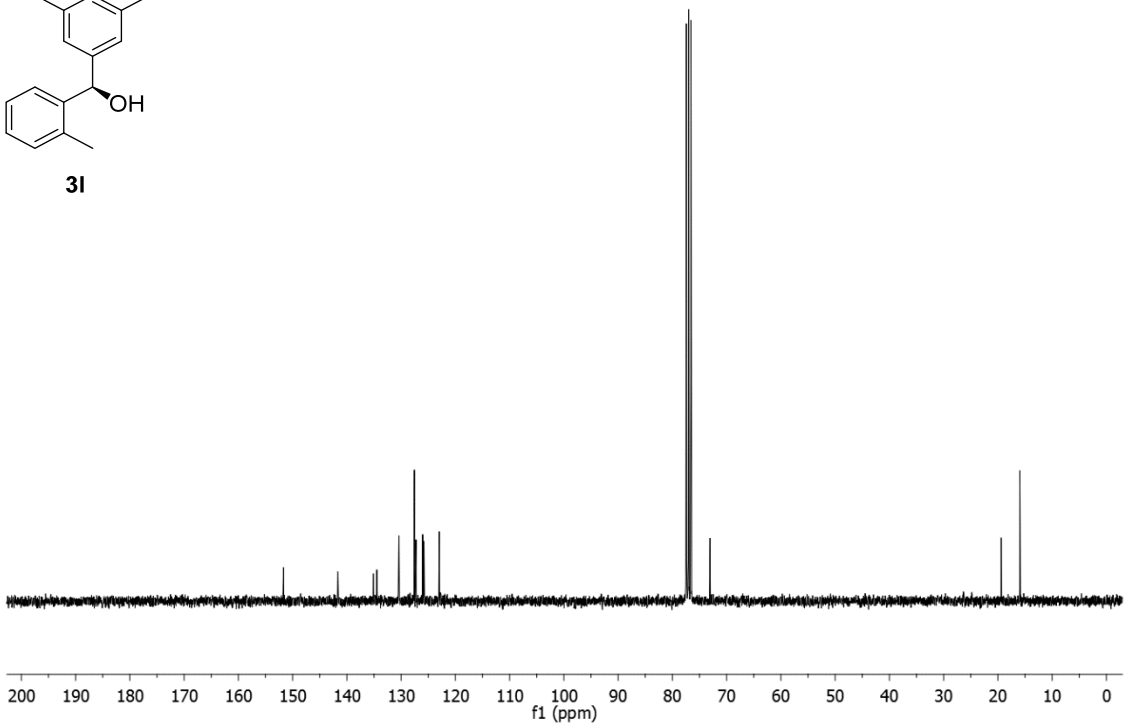

Figure S44: Spectra of compound **31**.



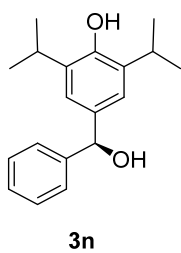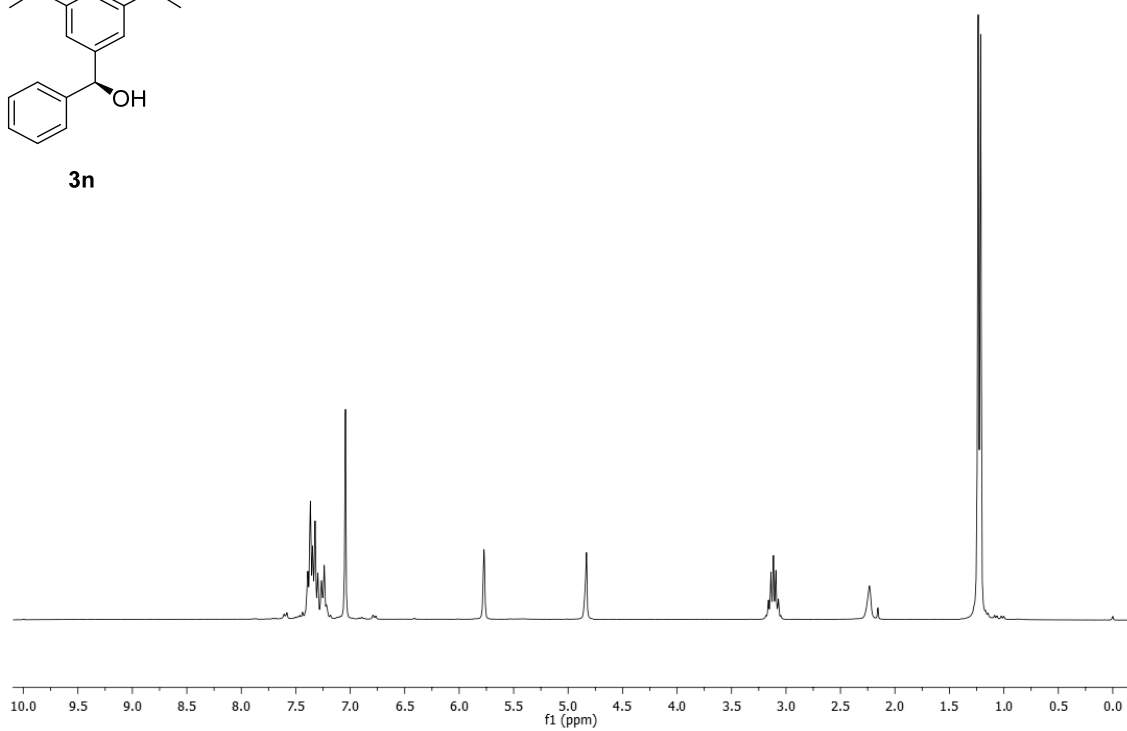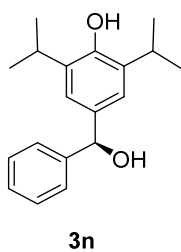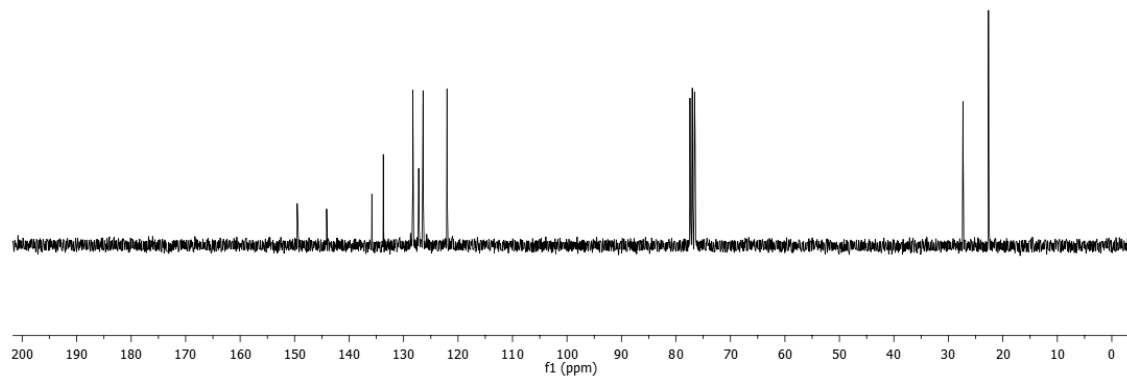

Figure S45: Spectra of compound **3n**.

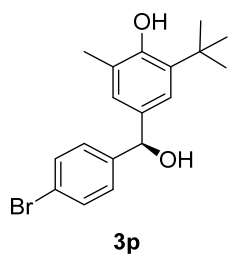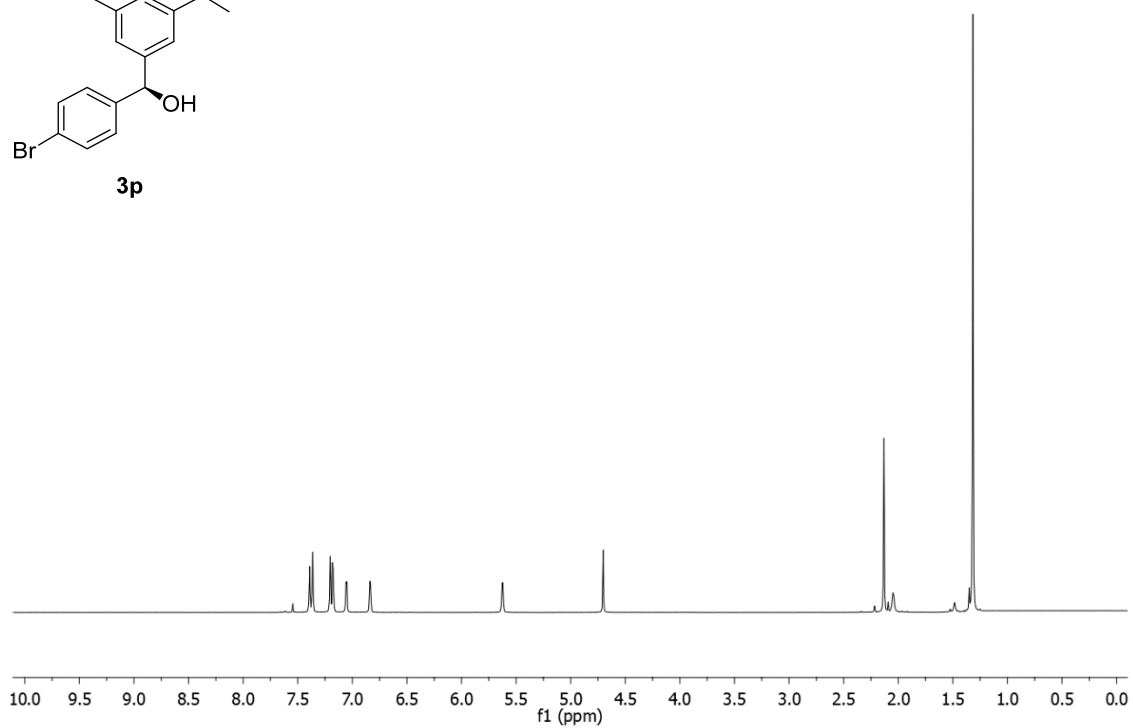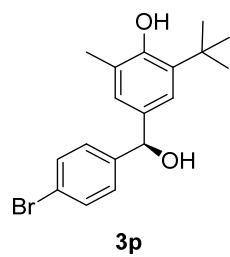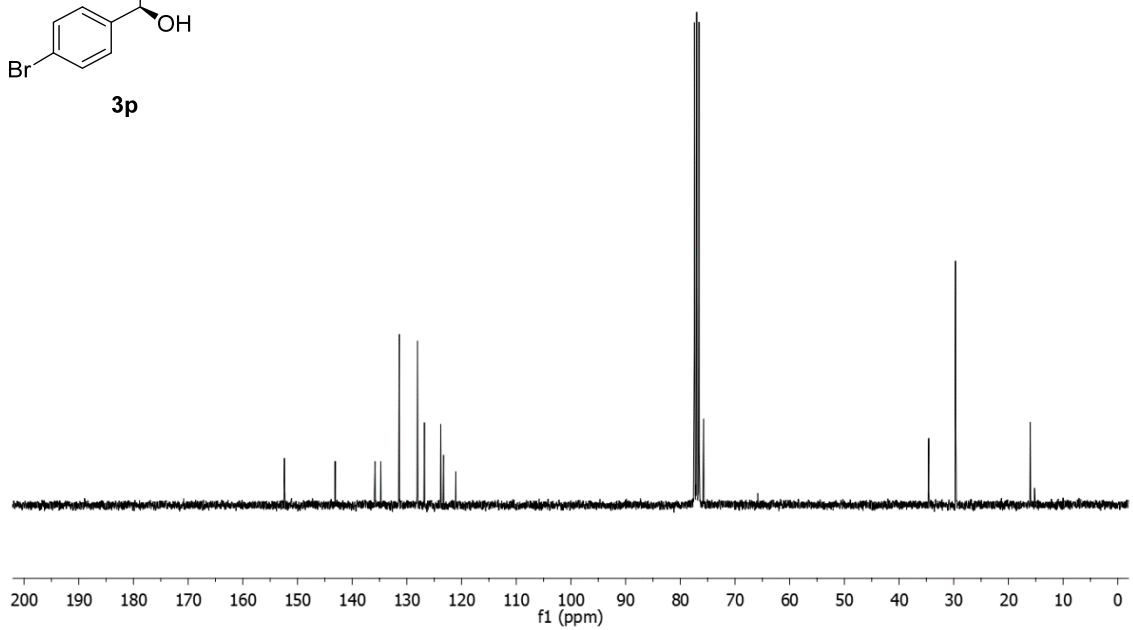

Figure S46: Spectra of compound **3p**.

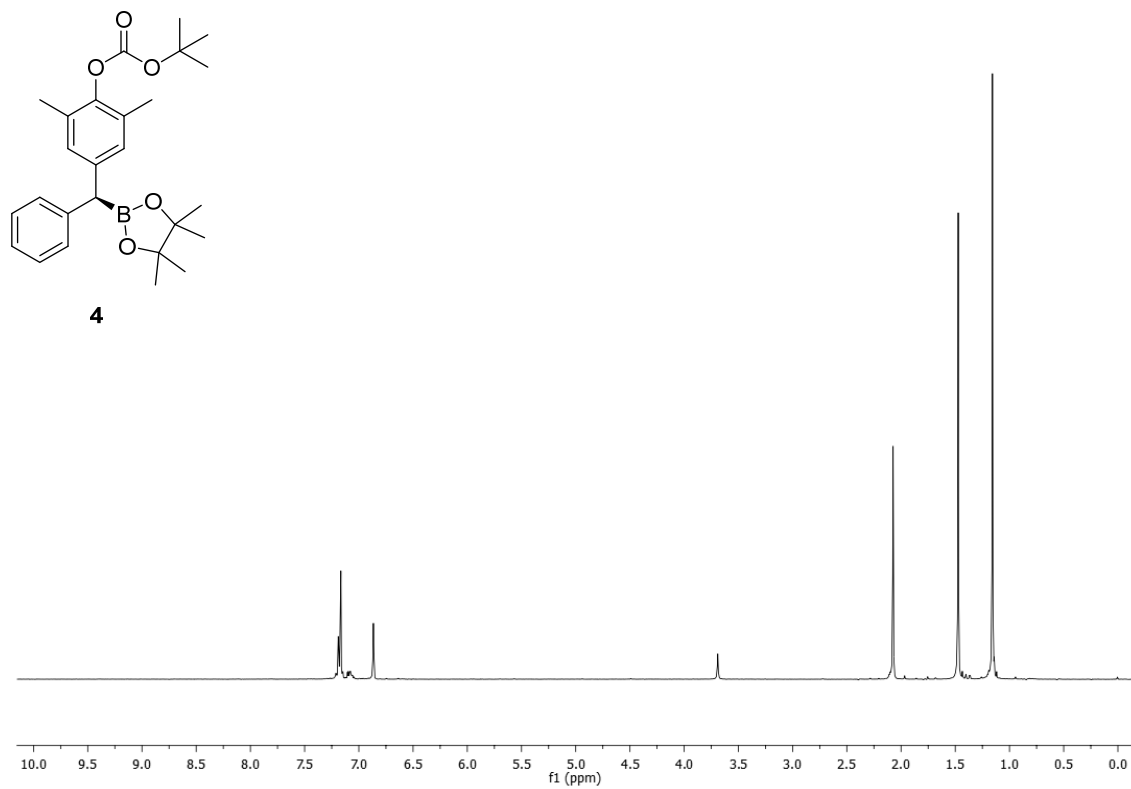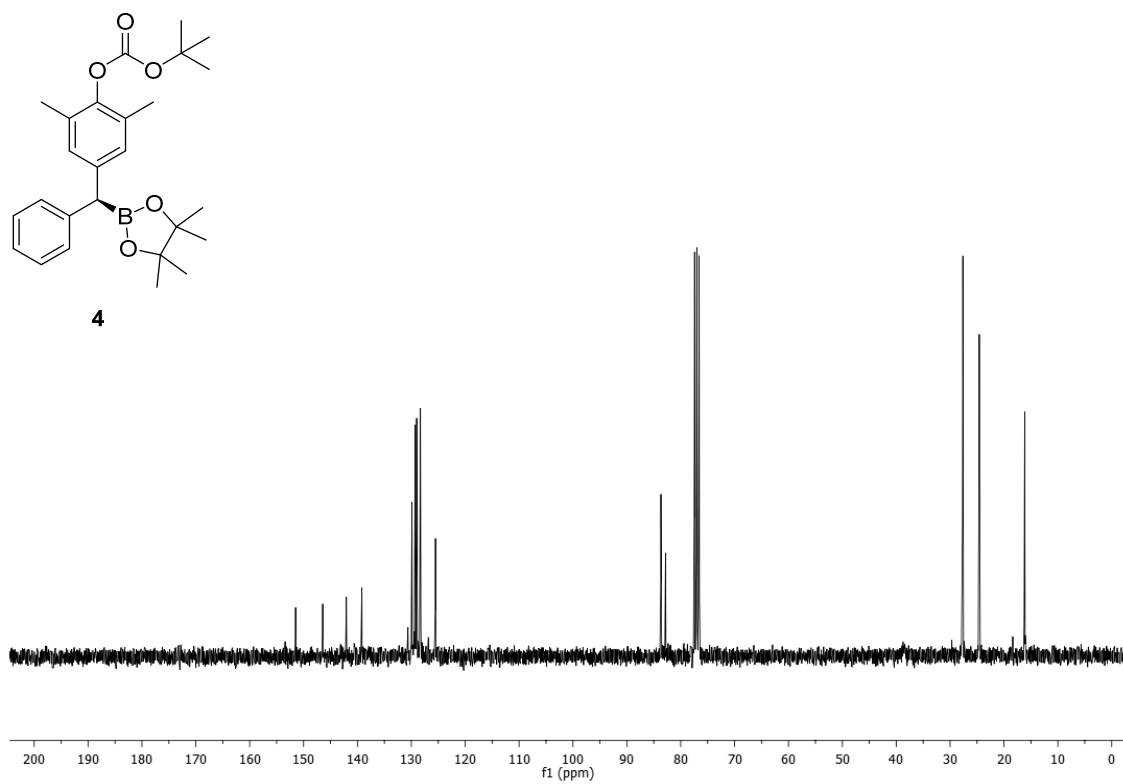

Figure S47: Spectra of compound 4.

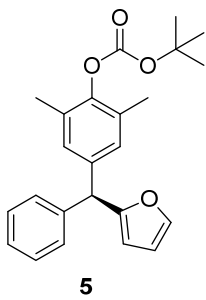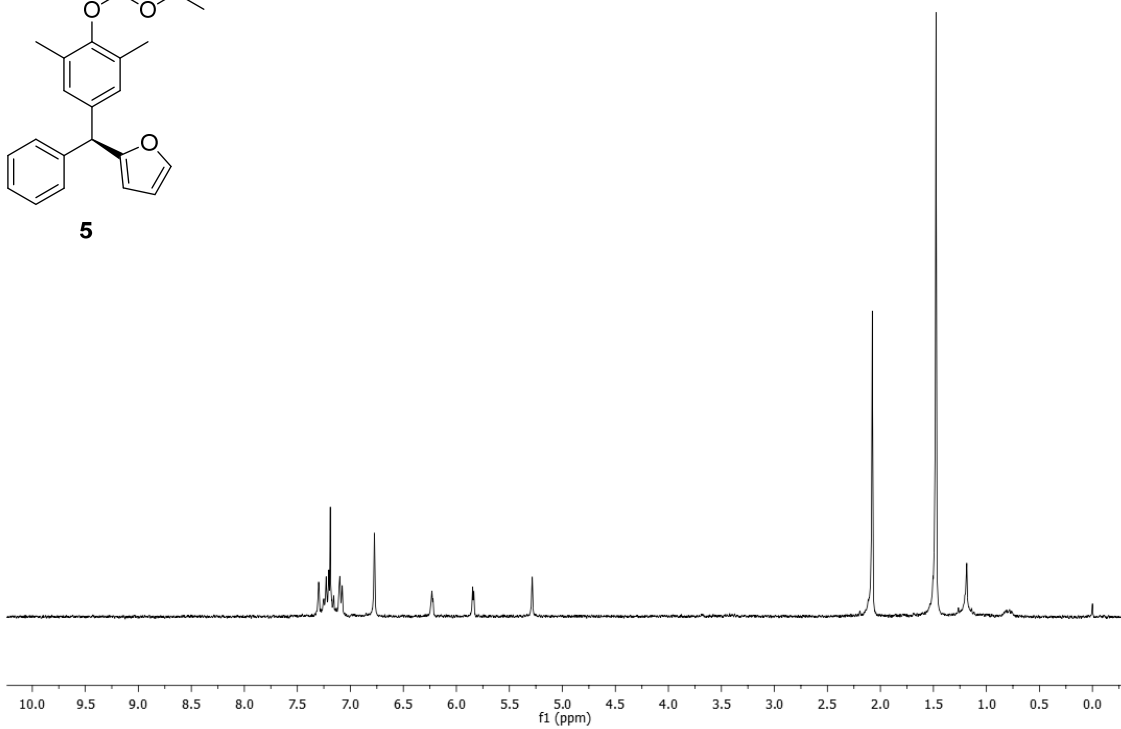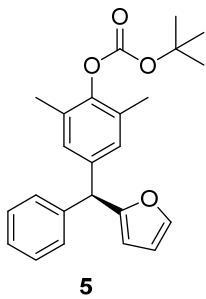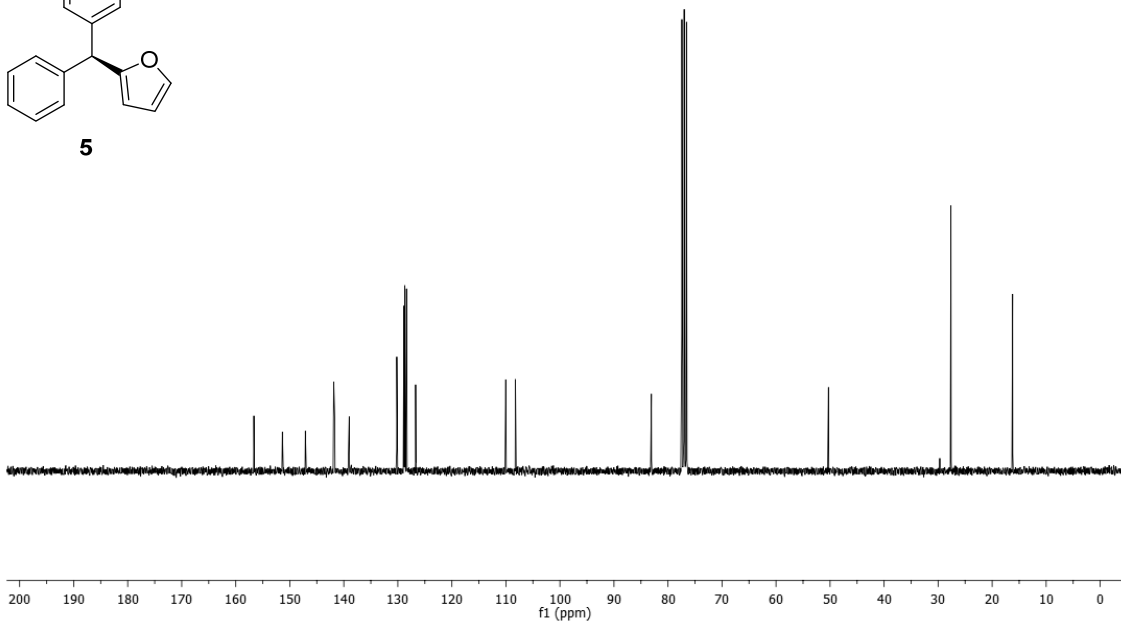

Figure S48: Spectra of compound **5**.

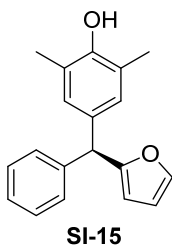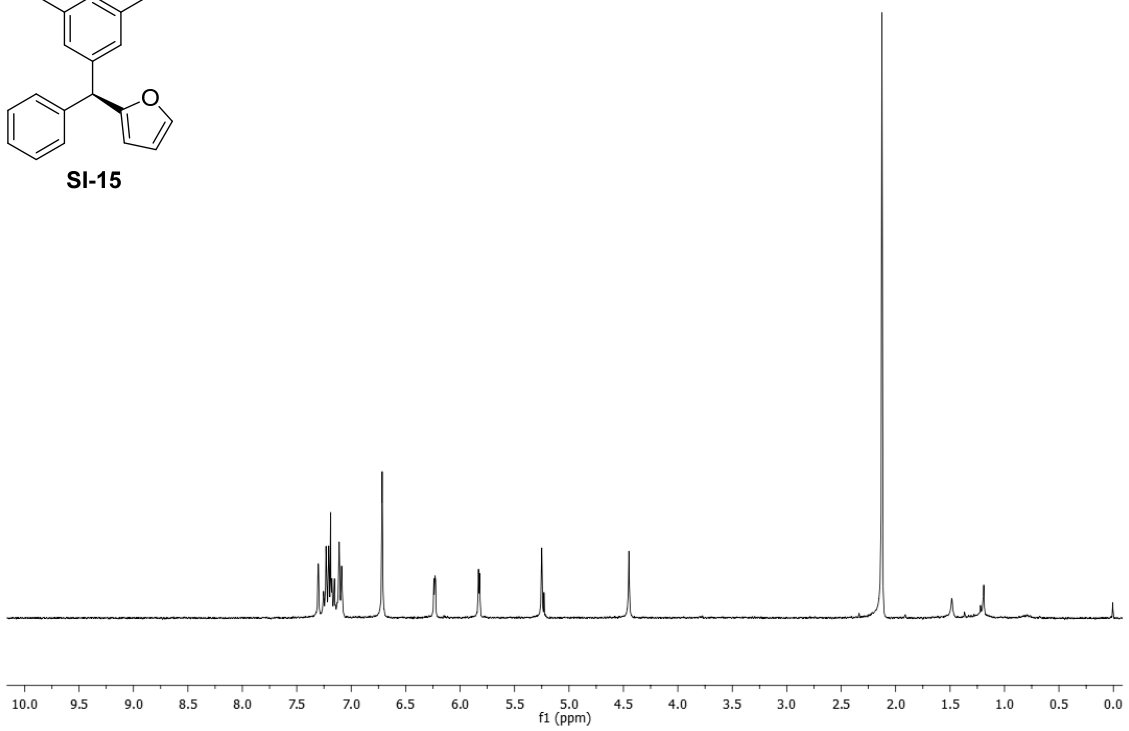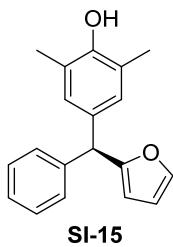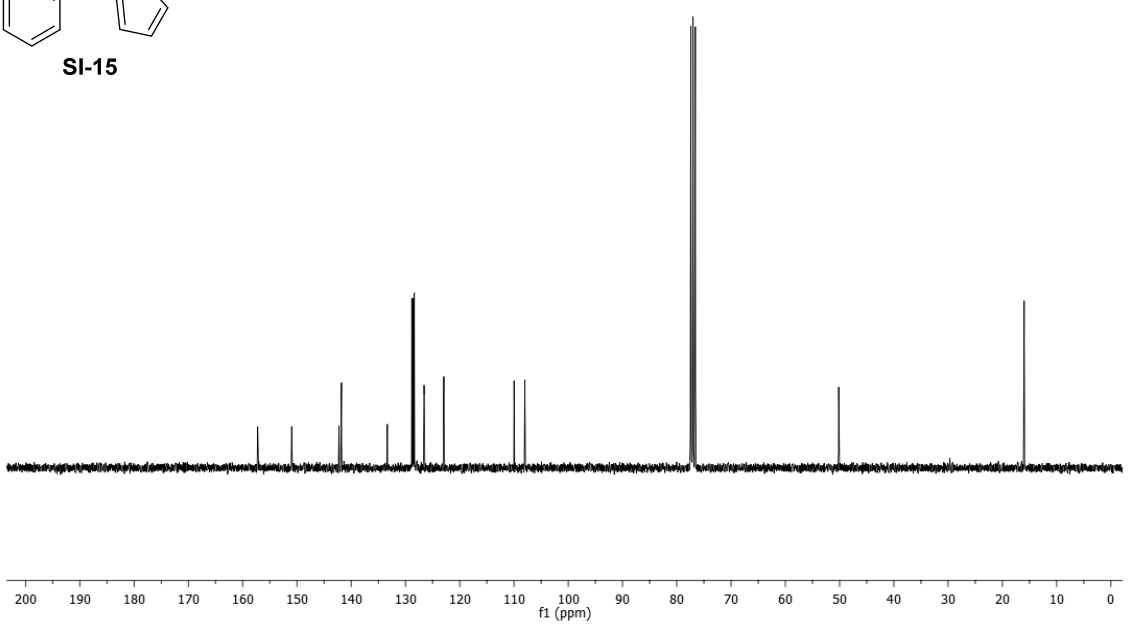

Figure S49: Spectra of compound **SI-15**.

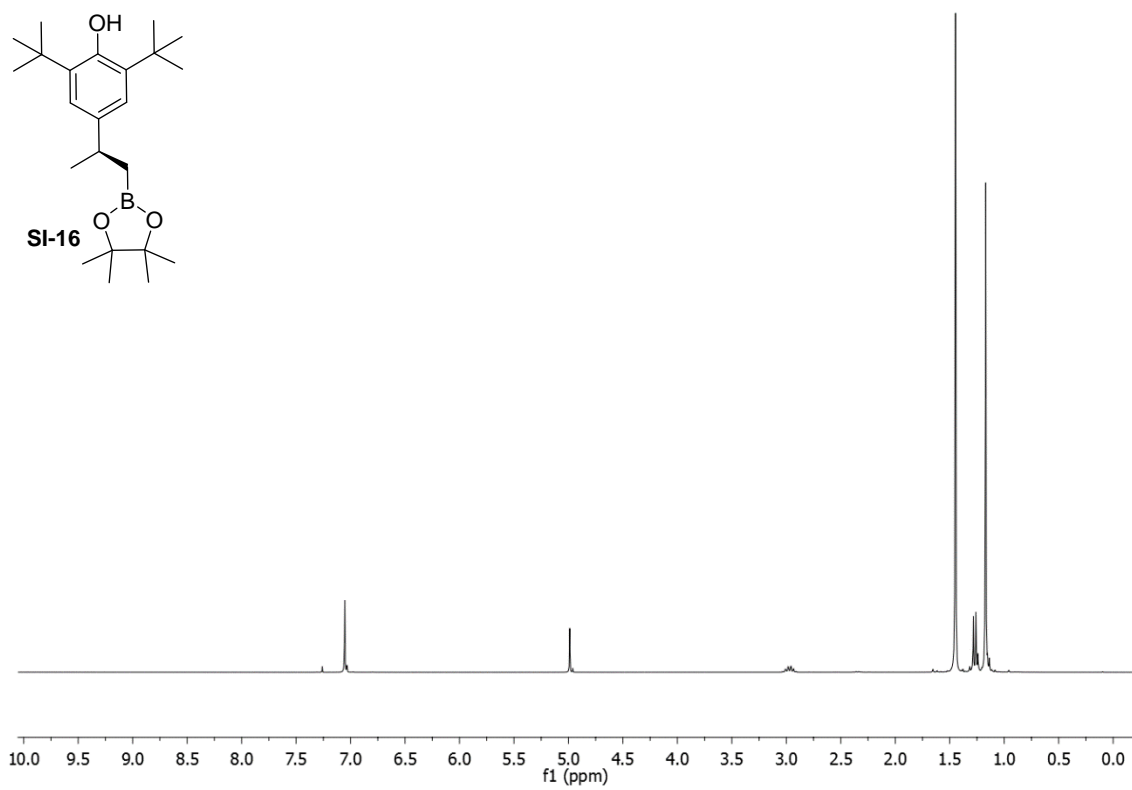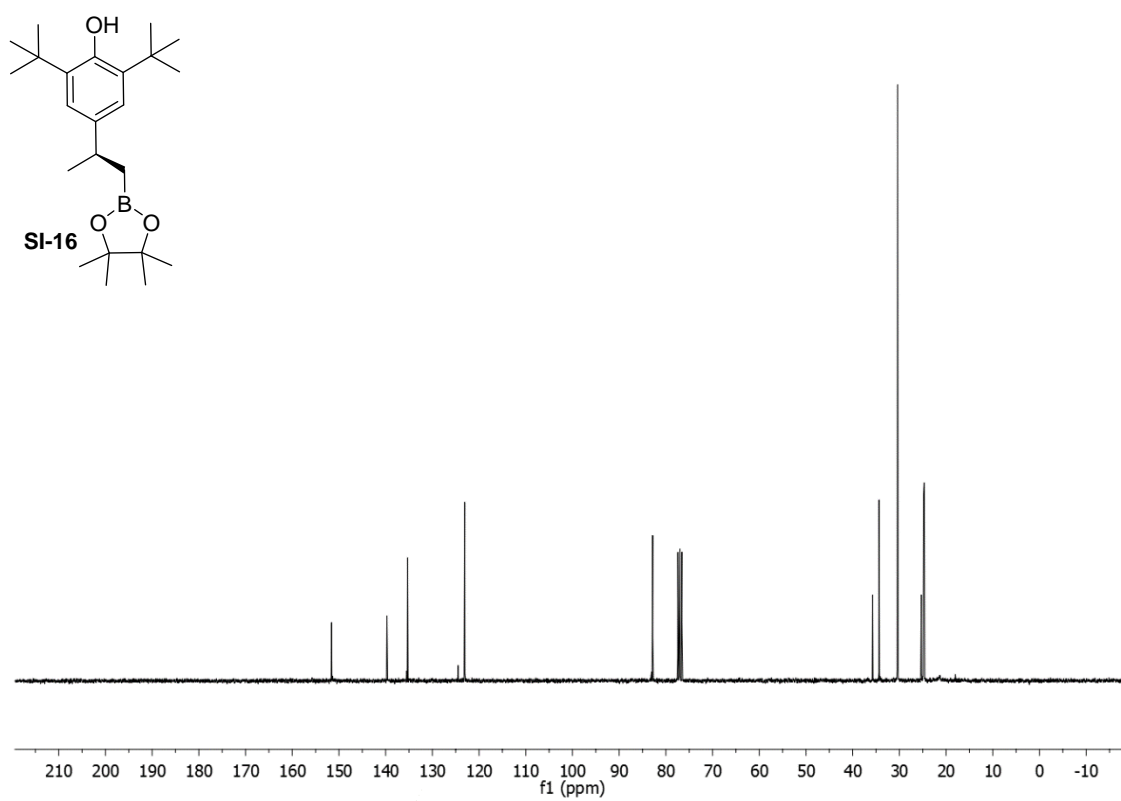

Figure S50: Spectra of compound **SI-16**.

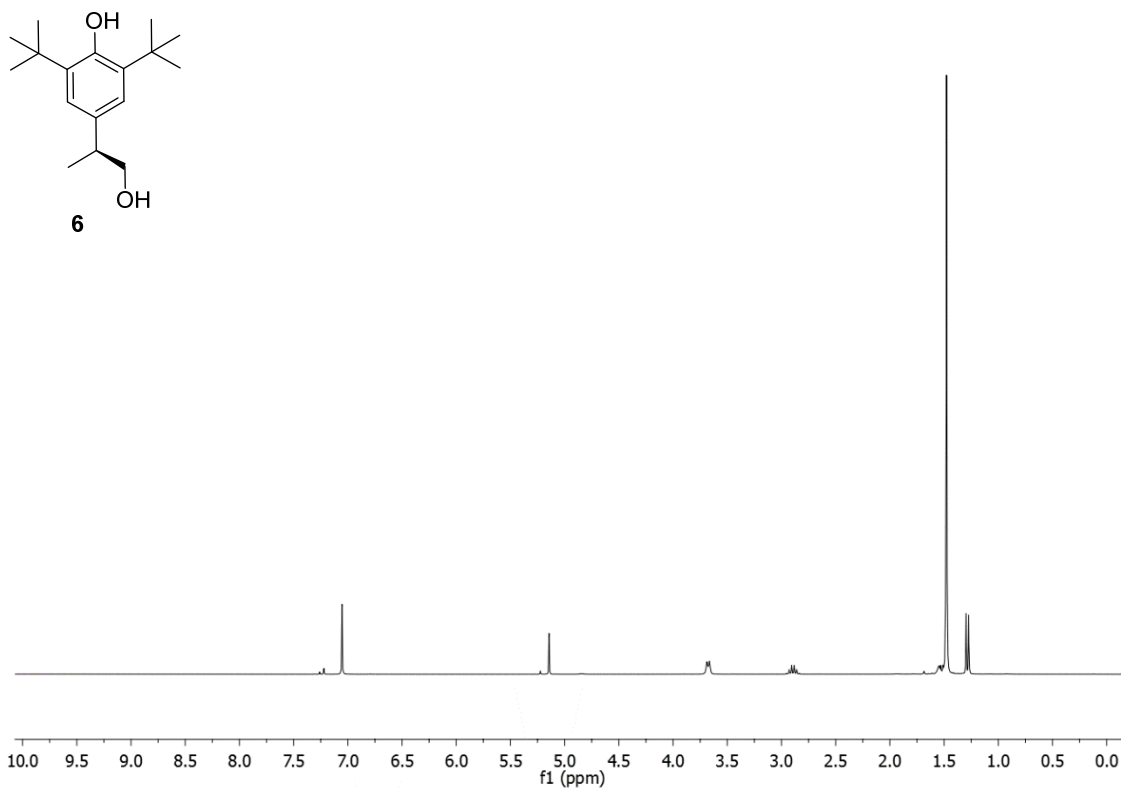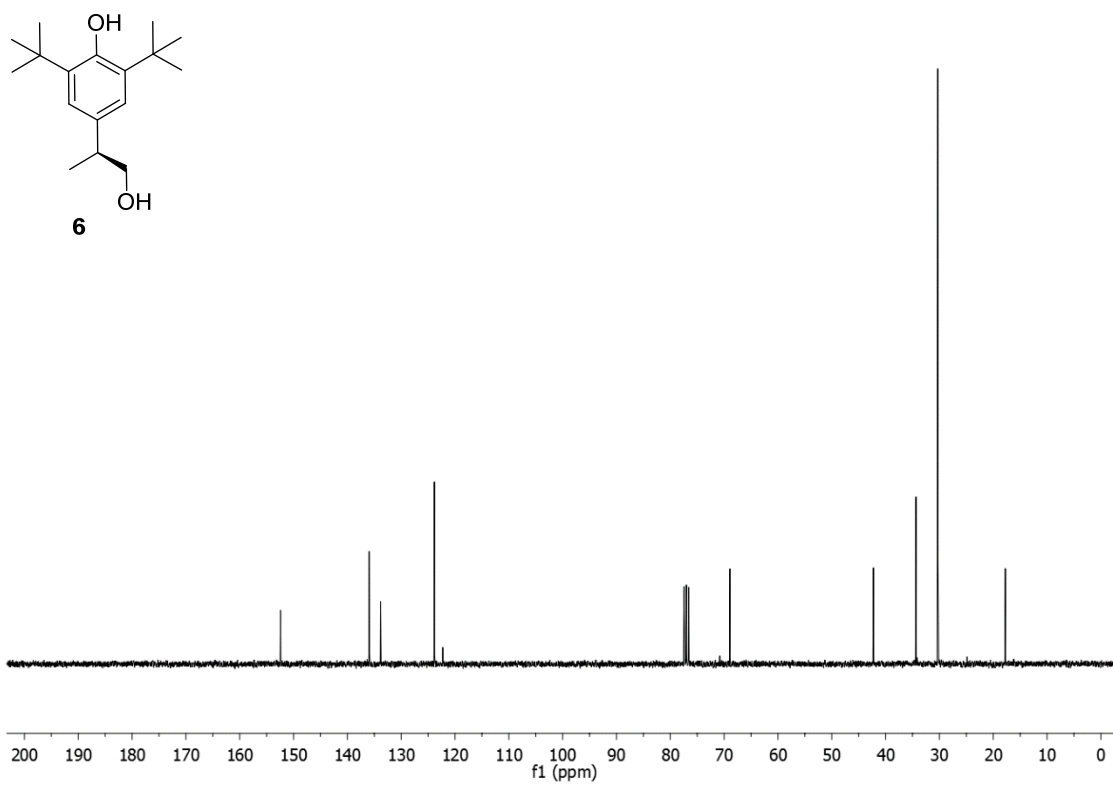

Figure S51: Spectra of compound **6**.

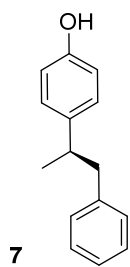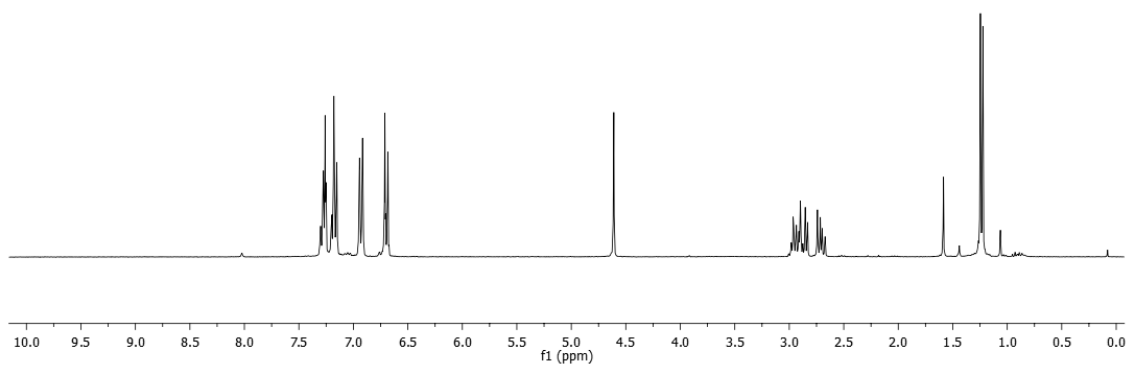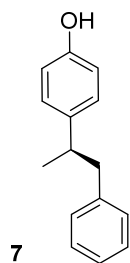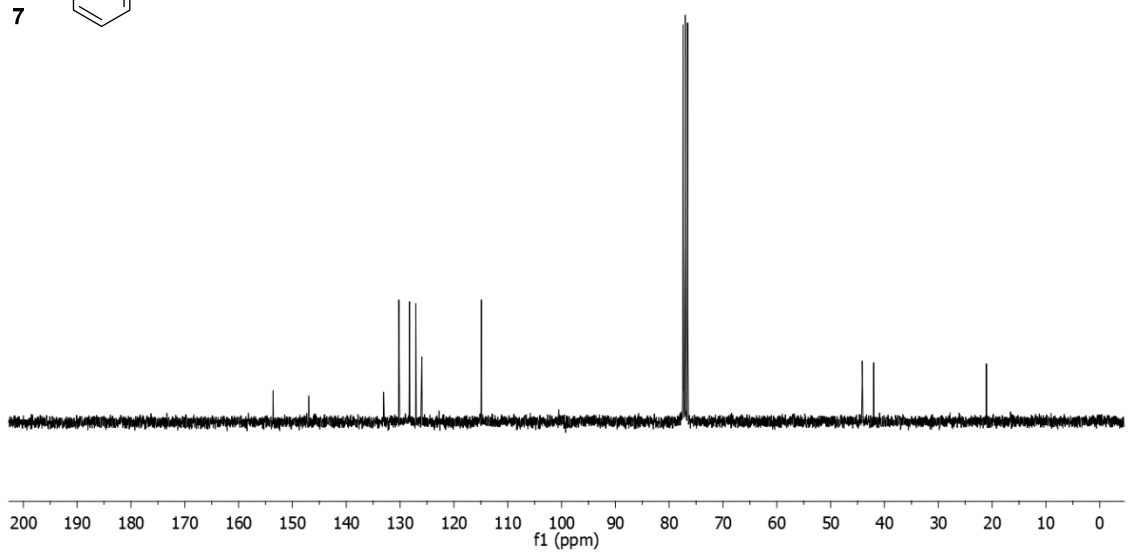

Figure S52: Spectra of compound 7.



## 7. SFC and HPLC chromatograms

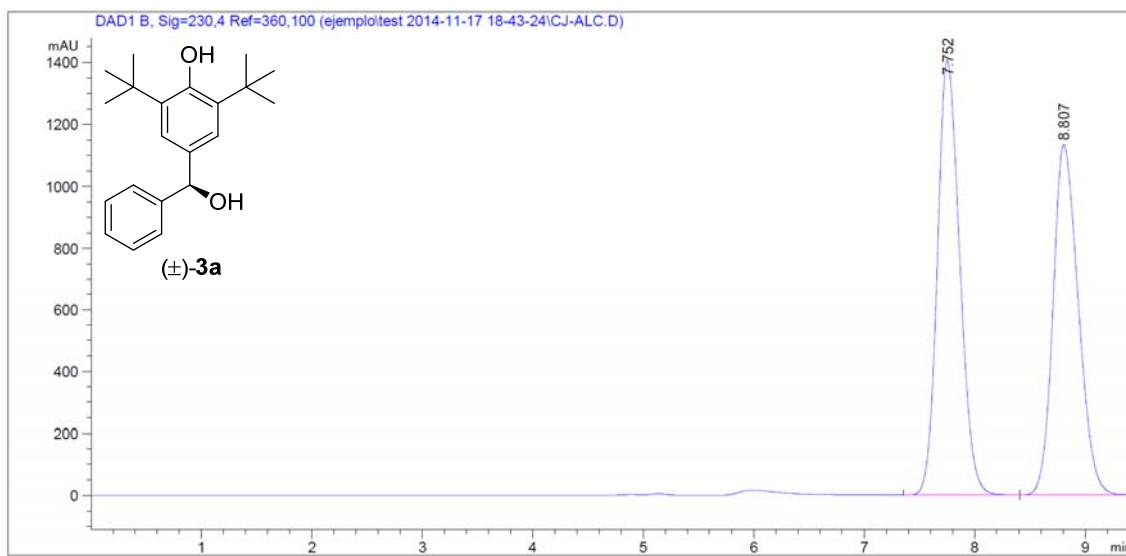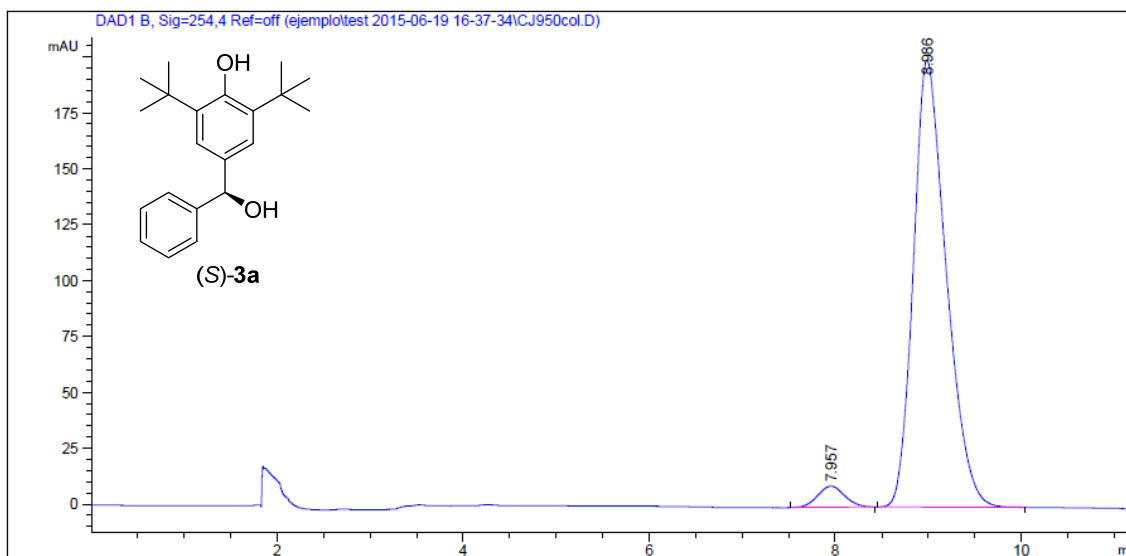

| Peak # | RetTime [min] | Type | Width [min] | Area [mAU*s] | Height [mAU] | Area %  |
|--------|---------------|------|-------------|--------------|--------------|---------|
| 1      | 7.957         | BB   | 0.2374      | 191.01881    | 9.46784      | 3.7523  |
| 2      | 8.986         | BB   | 0.3512      | 4899.65430   | 200.04854    | 96.2477 |

Figure S53: HPLC chromatogram of compound **3a**.

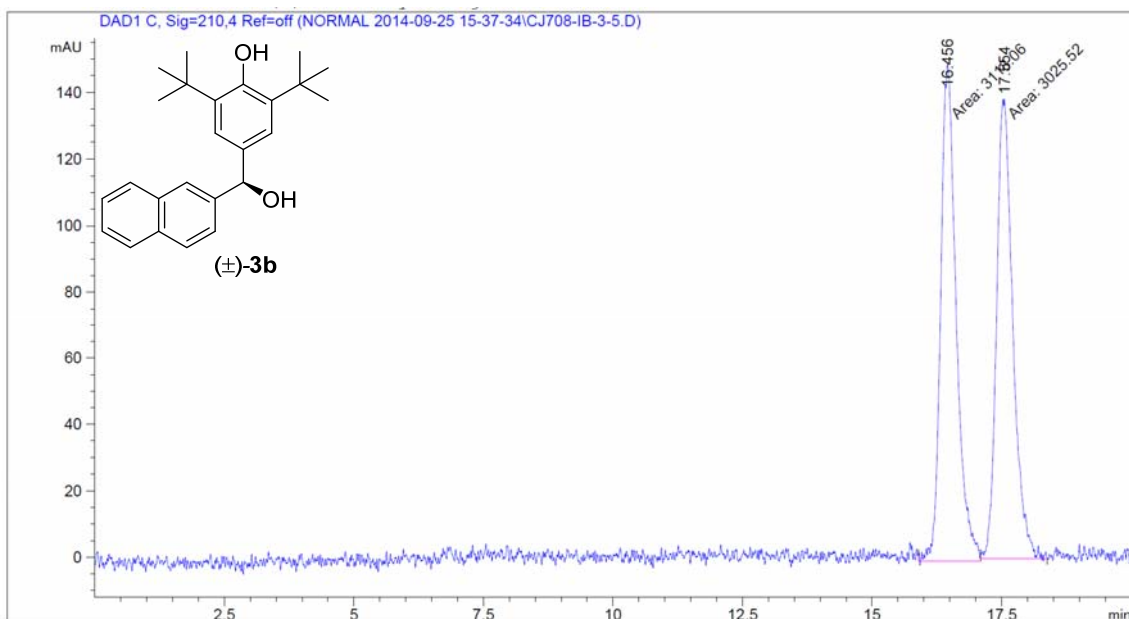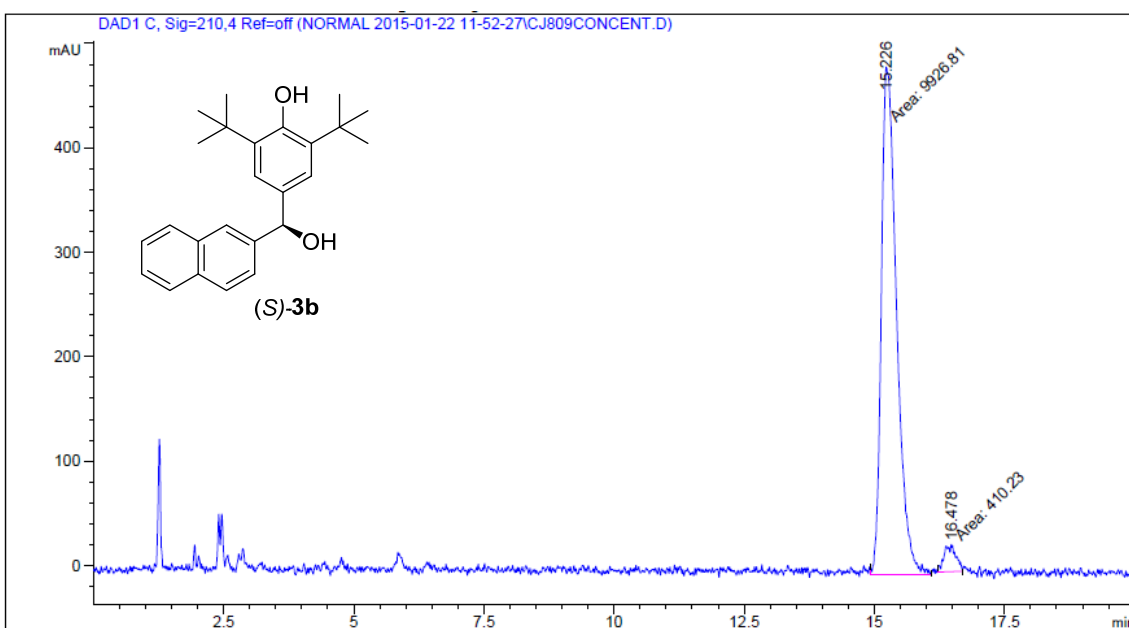

| Peak # | RetTime [min] | Type | Width [min] | Area [mAU*s] | Height [mAU] | Area %  |
|--------|---------------|------|-------------|--------------|--------------|---------|
| 1      | 15.226        | MM   | 0.3399      | 9926.80762   | 486.78424    | 96.0315 |
| 2      | 16.478        | MM   | 0.2602      | 410.22952    | 26.27437     | 3.9685  |

Figure S54: SFC chromatogram of compound **3b**.

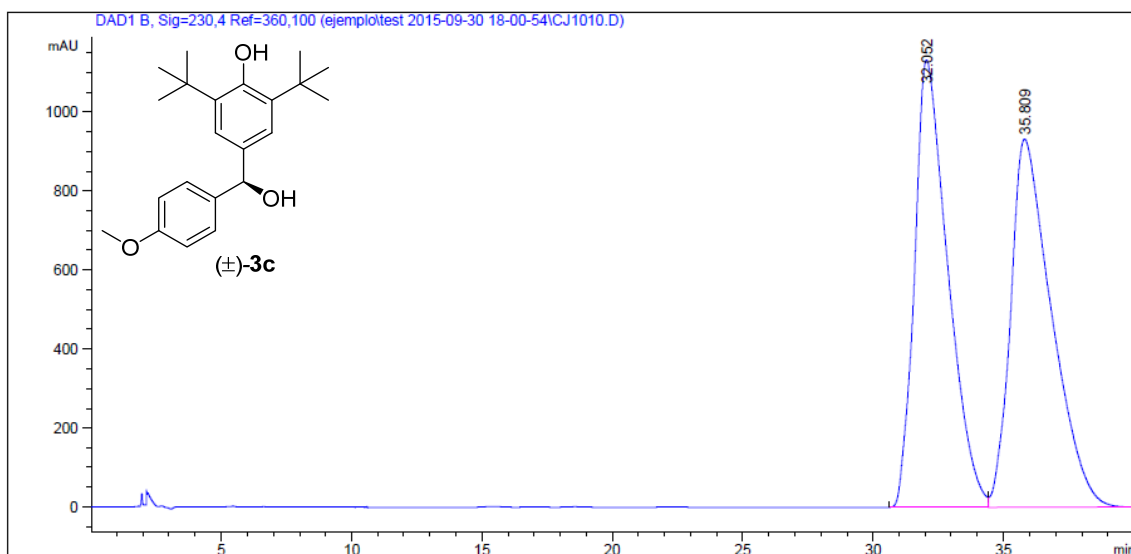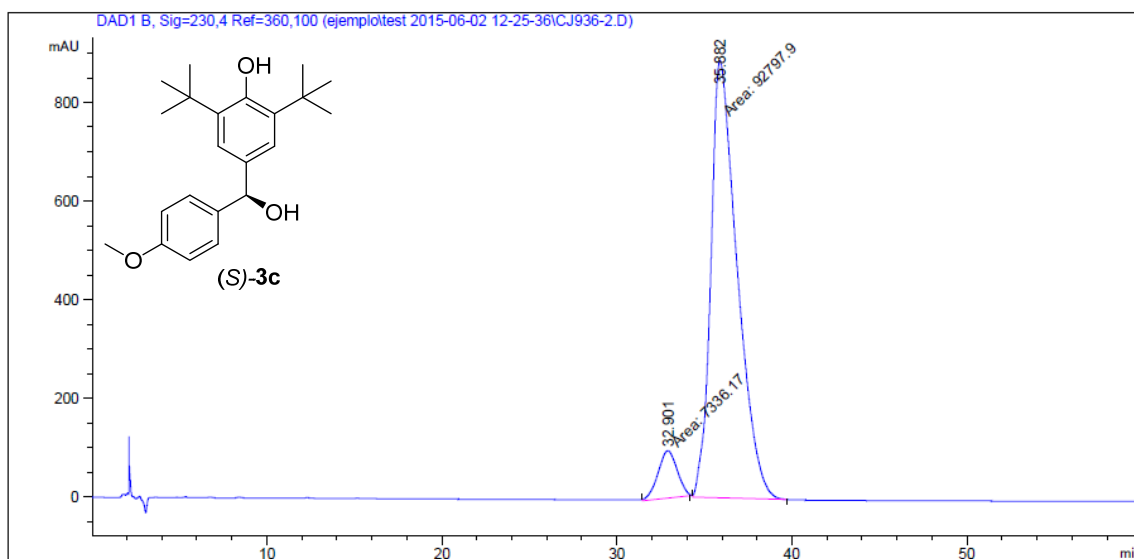

| Peak # | RetTime [min] | Type | Width [min] | Area [mAU*s] | Height [mAU] | Area %  |
|--------|---------------|------|-------------|--------------|--------------|---------|
| 1      | 32.901        | MM   | 1.2730      | 7336.17334   | 96.04536     | 7.3264  |
| 2      | 35.882        | MM   | 1.7470      | 9.27979e4    | 885.28558    | 92.6736 |

Figure S55: HPLC chromatogram of compound 3c.

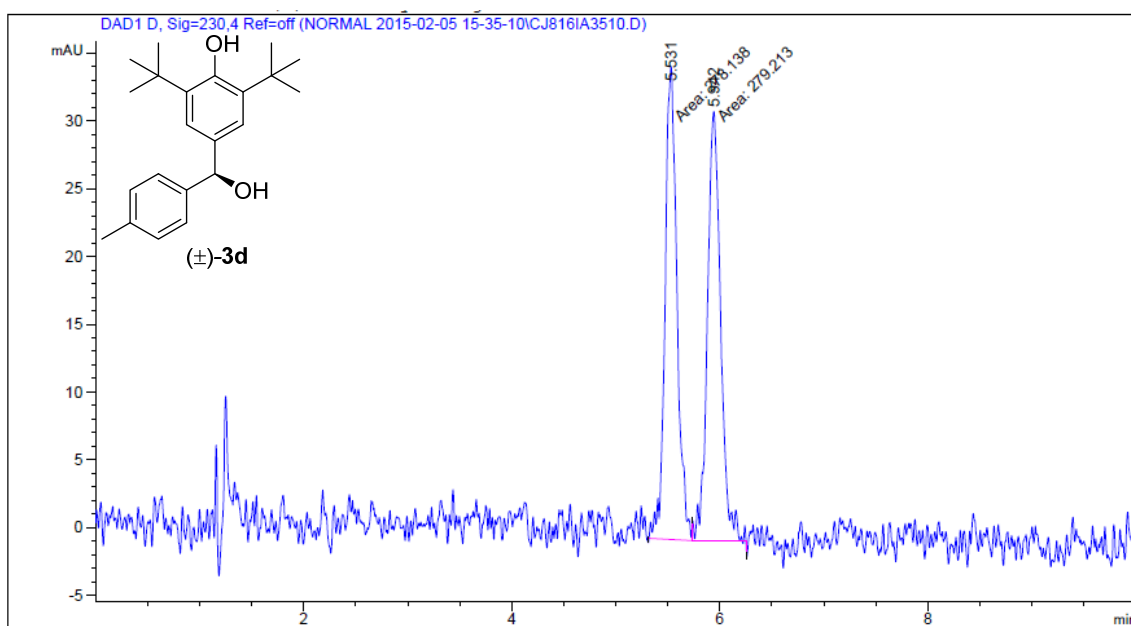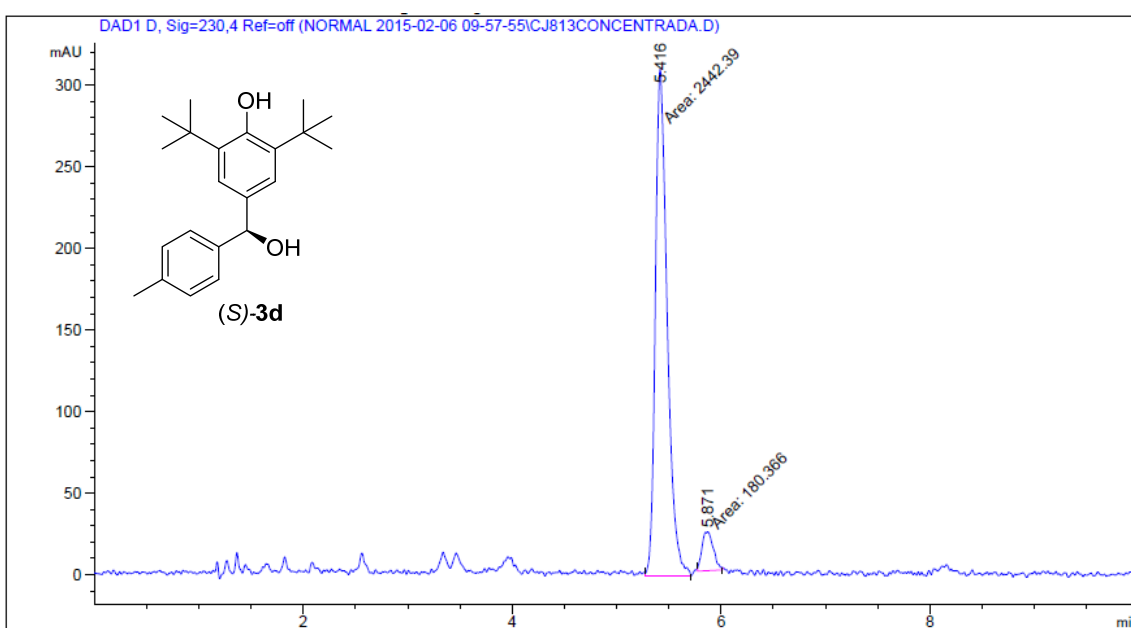

| Peak # | RetTime [min] | Type | Width [min] | Area [mAU*s] | Height [mAU] | Area %  |
|--------|---------------|------|-------------|--------------|--------------|---------|
| 1      | 5.416         | MM   | 0.1310      | 2442.38818   | 310.65051    | 93.1230 |
| 2      | 5.871         | MM   | 0.1261      | 180.36591    | 23.84821     | 6.8770  |

Figure S56: SFC chromatogram of compound 3d.

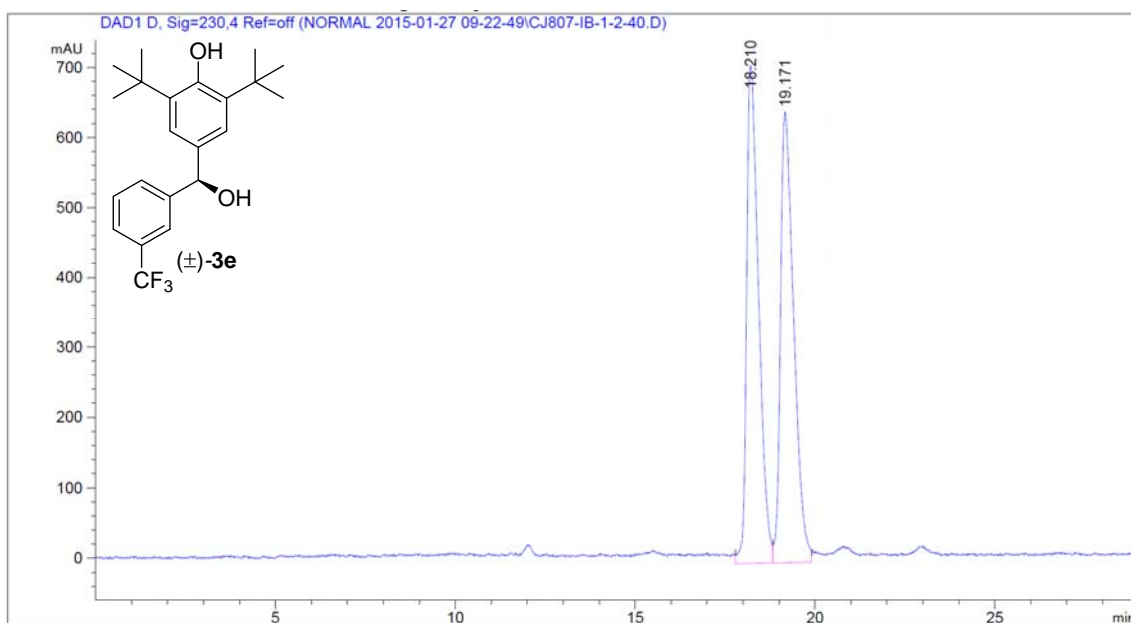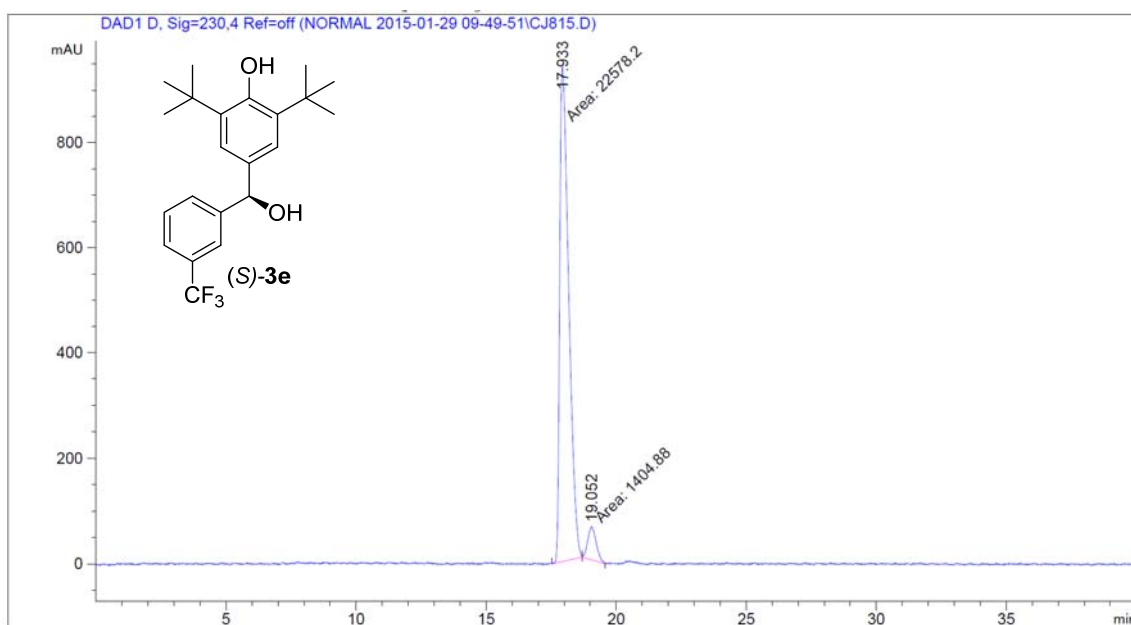

| Peak # | RetTime [min] | Type | Width [min] | Area [mAU*s] | Height [mAU] | Area %  |
|--------|---------------|------|-------------|--------------|--------------|---------|
| 1      | 17.933        | MM   | 0.3999      | 2.25782e4    | 940.91229    | 94.1422 |
| 2      | 19.052        | MM   | 0.3715      | 1404.87708   | 63.02040     | 5.8578  |

Figure S57: SFC chromatogram of compound 3e.

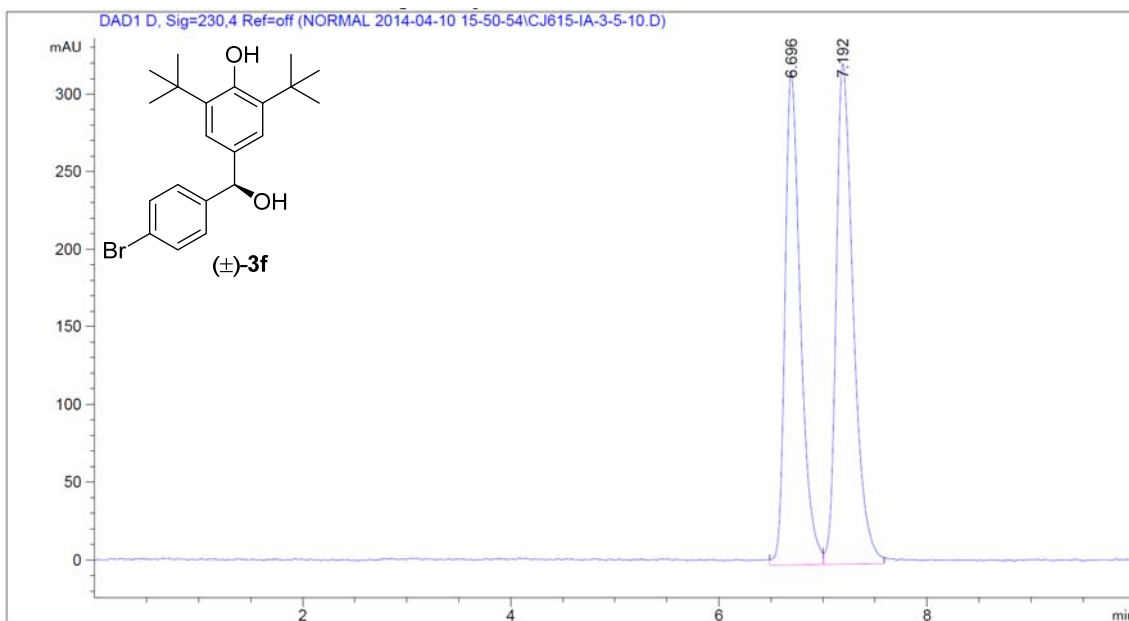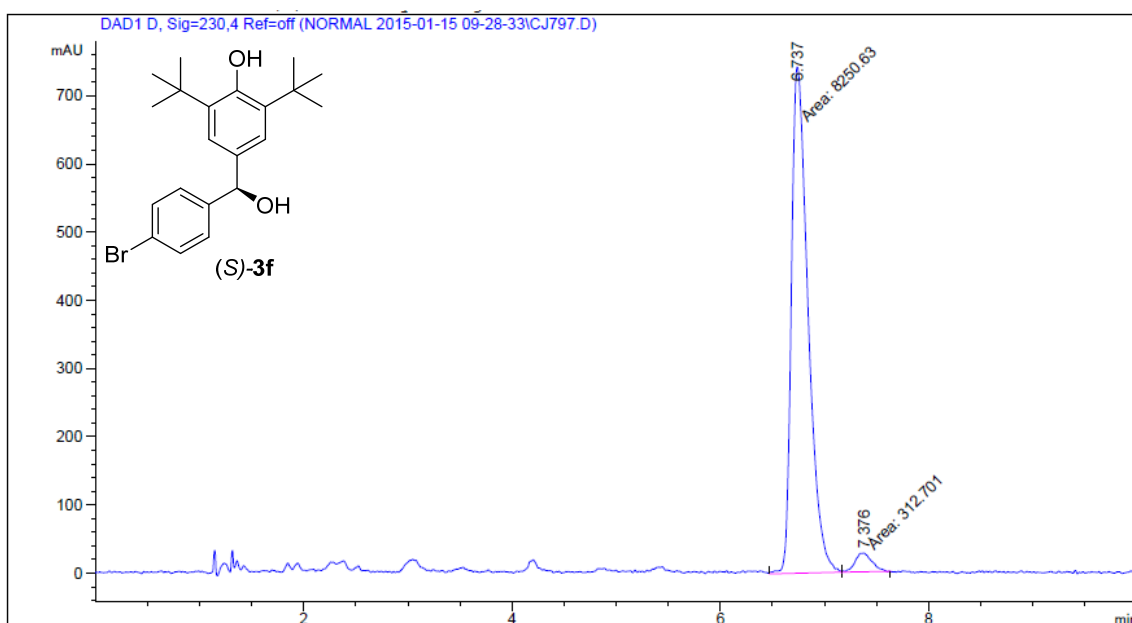

| Peak # | RetTime [min] | Type | Width [min] | Area [mAU*s] | Height [mAU] | Area %  |
|--------|---------------|------|-------------|--------------|--------------|---------|
| 1      | 6.738         | VV   | 0.1631      | 8290.87988   | 743.50781    | 95.4018 |
| 2      | 7.376         | VV   | 0.1561      | 399.60156    | 31.26399     | 4.5982  |

Figure S58: SFC chromatogram of compound **3f**.

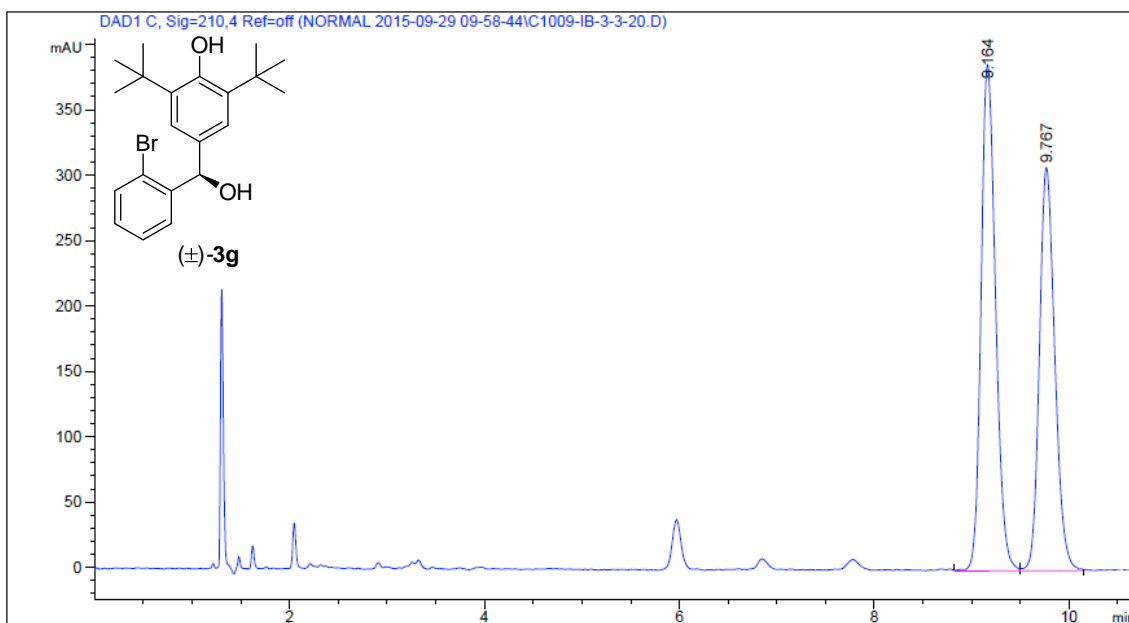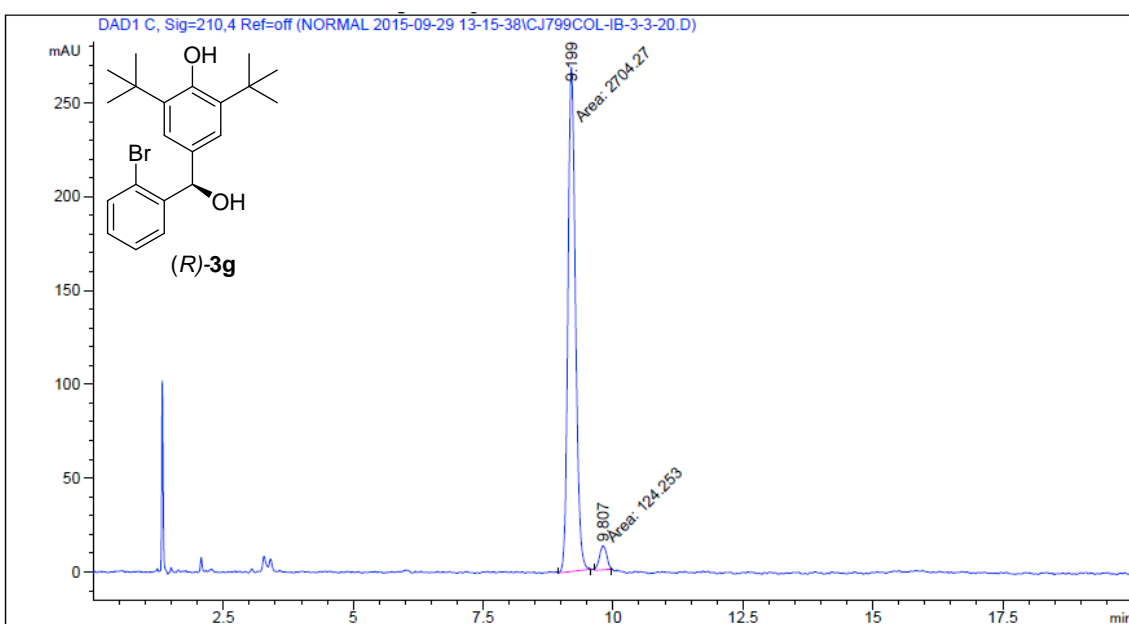

| Peak # | RetTime [min] | Type | Width [min] | Area [mAU*s] | Height [mAU] | Area %  |
|--------|---------------|------|-------------|--------------|--------------|---------|
| 1      | 9.199         | MM   | 0.1678      | 2704.26880   | 268.66586    | 95.6071 |
| 2      | 9.807         | MM   | 0.1609      | 124.25291    | 12.87134     | 4.3929  |

Figure S59: SFC chromatogram of compound **3g**.

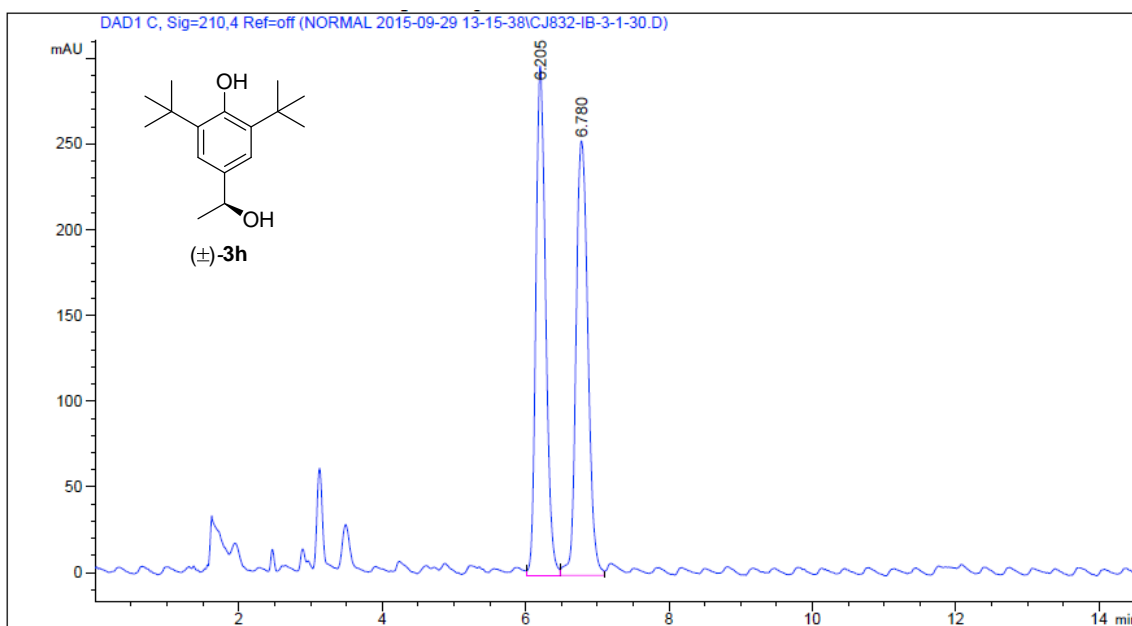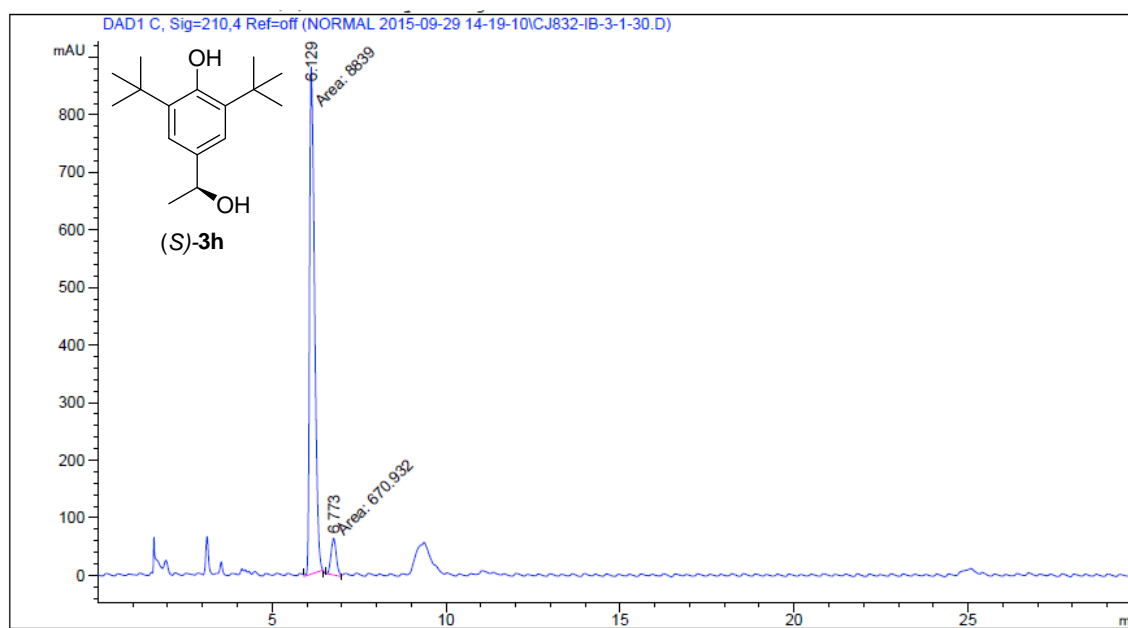

| Peak # | RetTime [min] | Type | Width [min] | Area [mAU*s] | Height [mAU] | Area %  |
|--------|---------------|------|-------------|--------------|--------------|---------|
| 1      | 6.129         | MM   | 0.1672      | 8839.00391   | 880.99493    | 92.9449 |
| 2      | 6.773         | MM   | 0.1749      | 670.93164    | 63.93721     | 7.0551  |

Figure S60: HPLC chromatogram of compound 3h.



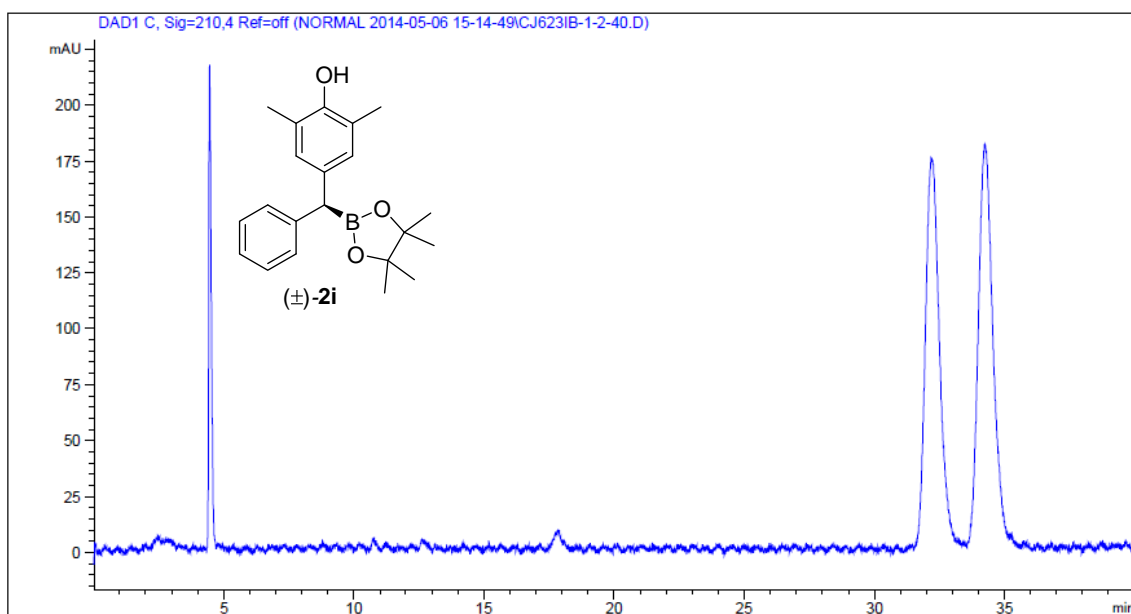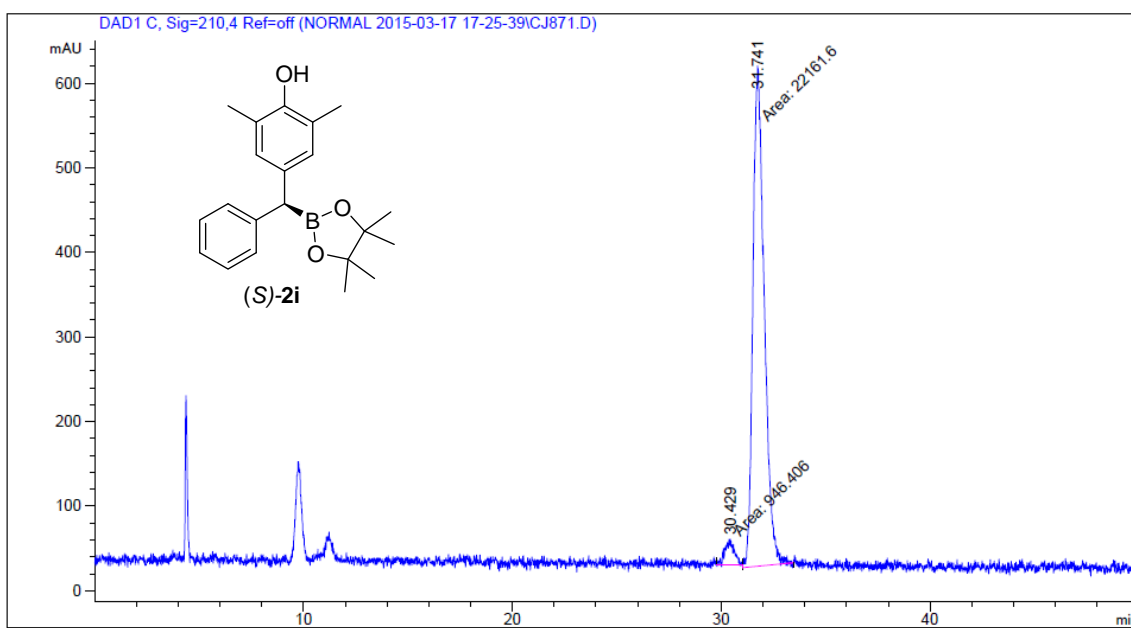

| Peak # | RetTime [min] | Type | Width [min] | Area [mAU*s] | Height [mAU] | Area %  |
|--------|---------------|------|-------------|--------------|--------------|---------|
| 1      | 30.429        | MM   | 0.5077      | 946.40619    | 31.06891     | 4.0956  |
| 2      | 31.741        | MM   | 0.6241      | 2.21616e4    | 591.84839    | 95.9044 |

Figure S61: SFC chromatogram of compound **2i**.

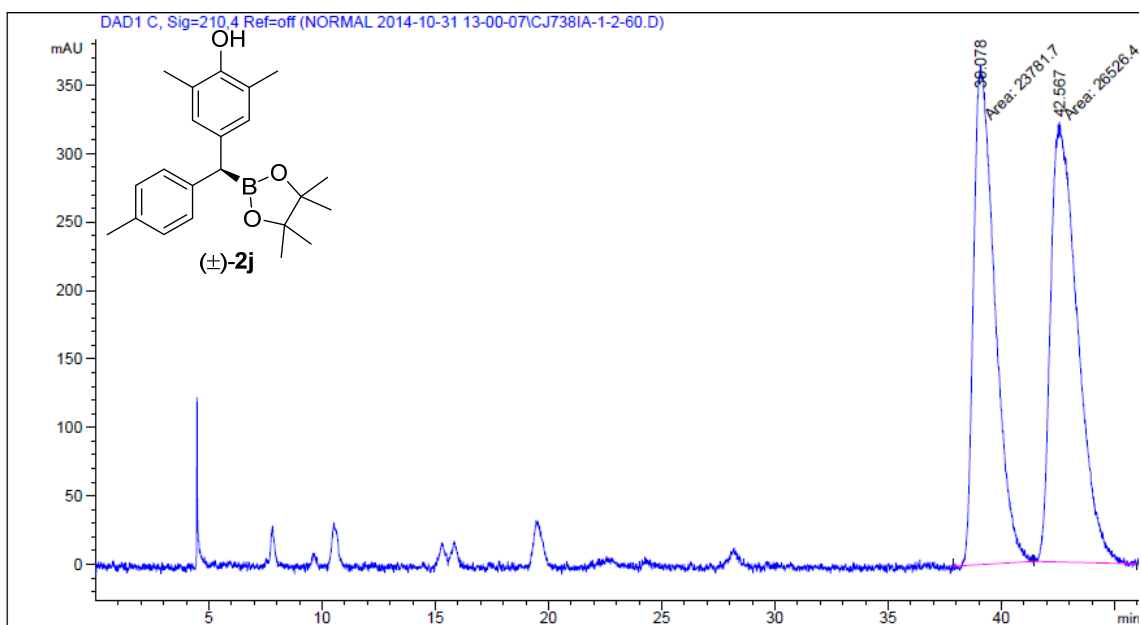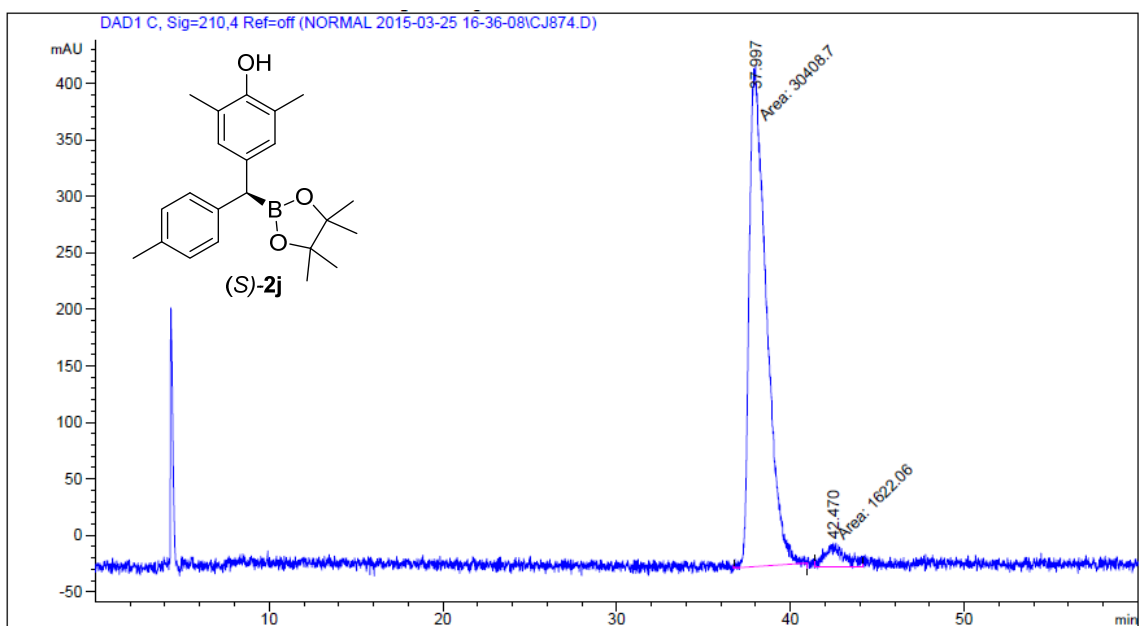

| Peak # | RetTime [min] | Type | Width [min] | Area [mAU*s] | Height [mAU] | Area %  |
|--------|---------------|------|-------------|--------------|--------------|---------|
| 1      | 37.997        | MM   | 1.1435      | 3.04087e4    | 443.20557    | 94.9359 |
| 2      | 42.470        | MM   | 1.2396      | 1622.05969   | 21.80921     | 5.0641  |

Figure S62: SFC chromatogram of compound **2j**.

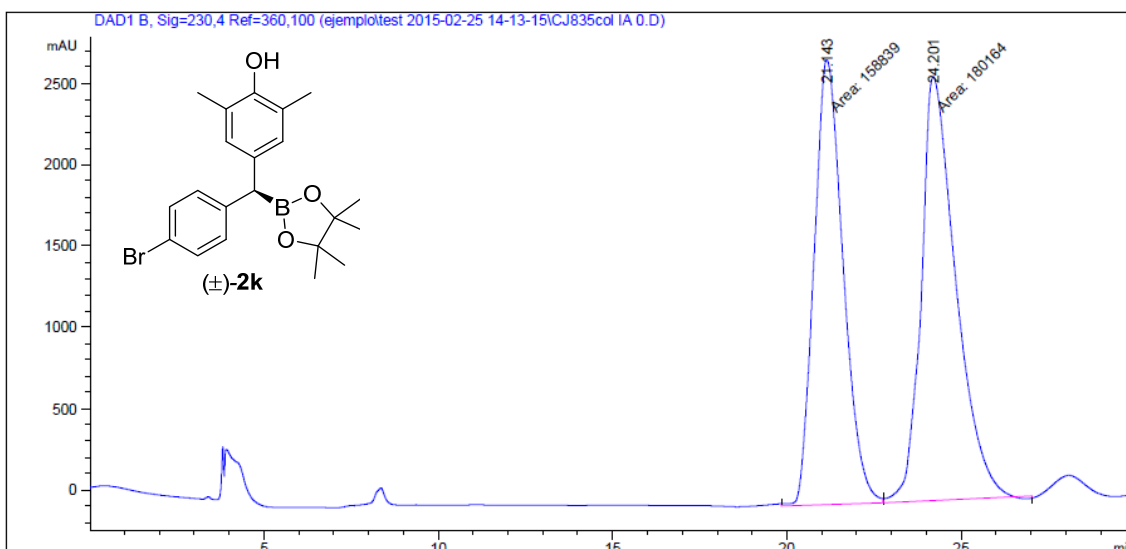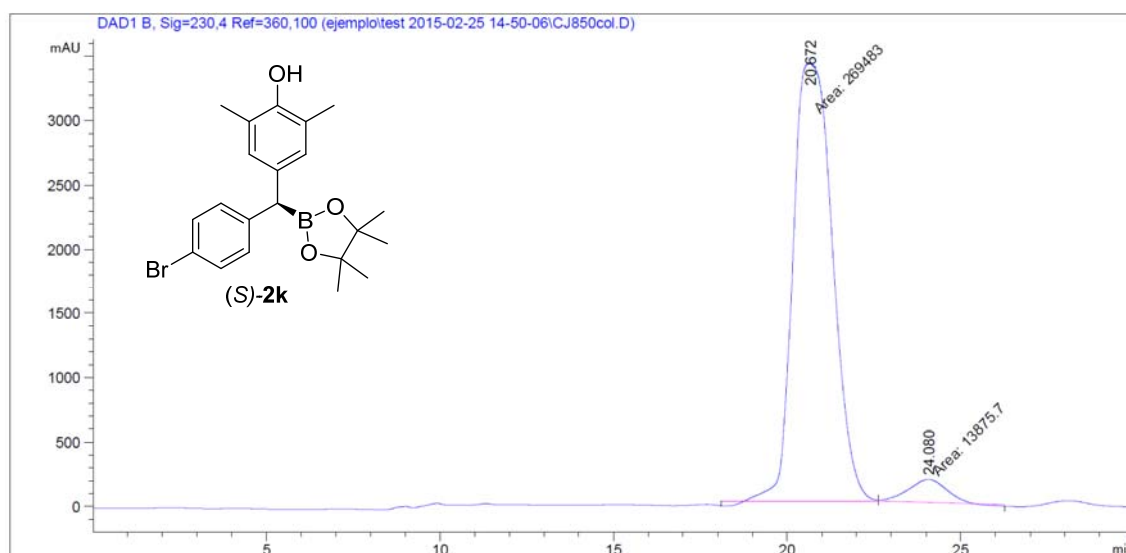

| Peak # | RetTime [min] | Type | Width [min] | Area [mAU*s] | Height [mAU] | Area %  |
|--------|---------------|------|-------------|--------------|--------------|---------|
| 1      | 20.672        | MM   | 1.3146      | 2.69483e5    | 3416.66016   | 95.1031 |
| 2      | 24.080        | MM   | 1.2852      | 1.38757e4    | 179.94501    | 4.8969  |

Figure S63: HPLC chromatogram of compound **2k**.

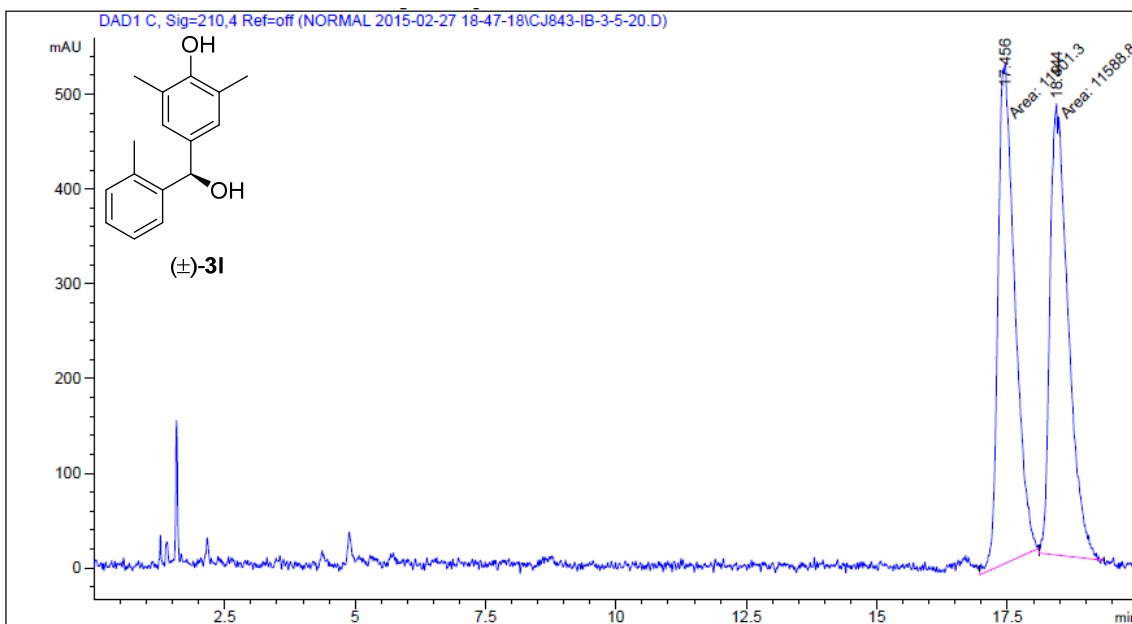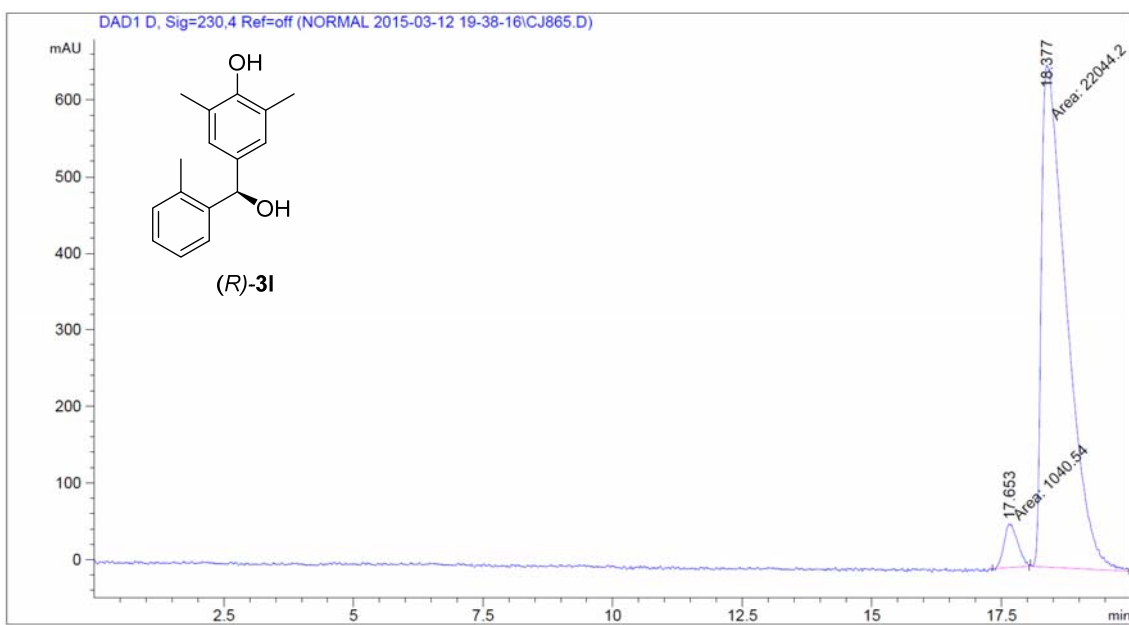

| Peak # | RetTime [min] | Type | Width [min] | Area [mAU*s] | Height [mAU] | Area %  |
|--------|---------------|------|-------------|--------------|--------------|---------|
| 1      | 17.653        | MM   | 0.3029      | 1040.53735   | 57.25291     | 4.5075  |
| 2      | 18.377        | MM   | 0.5606      | 2.20442e4    | 655.36865    | 95.4925 |

Figure S64: SFC chromatogram of compound 31.

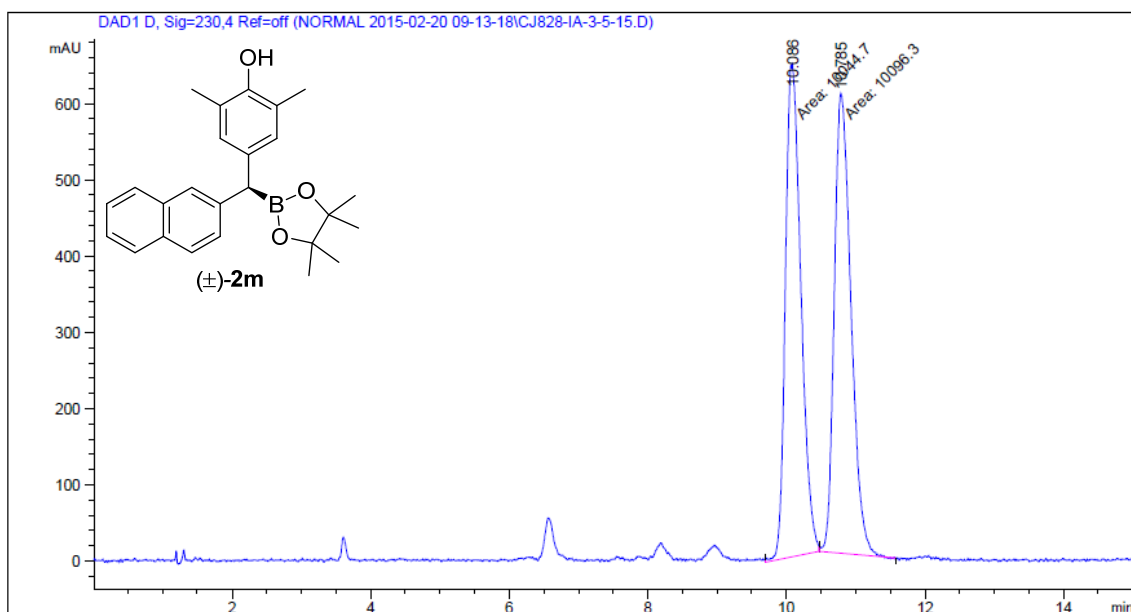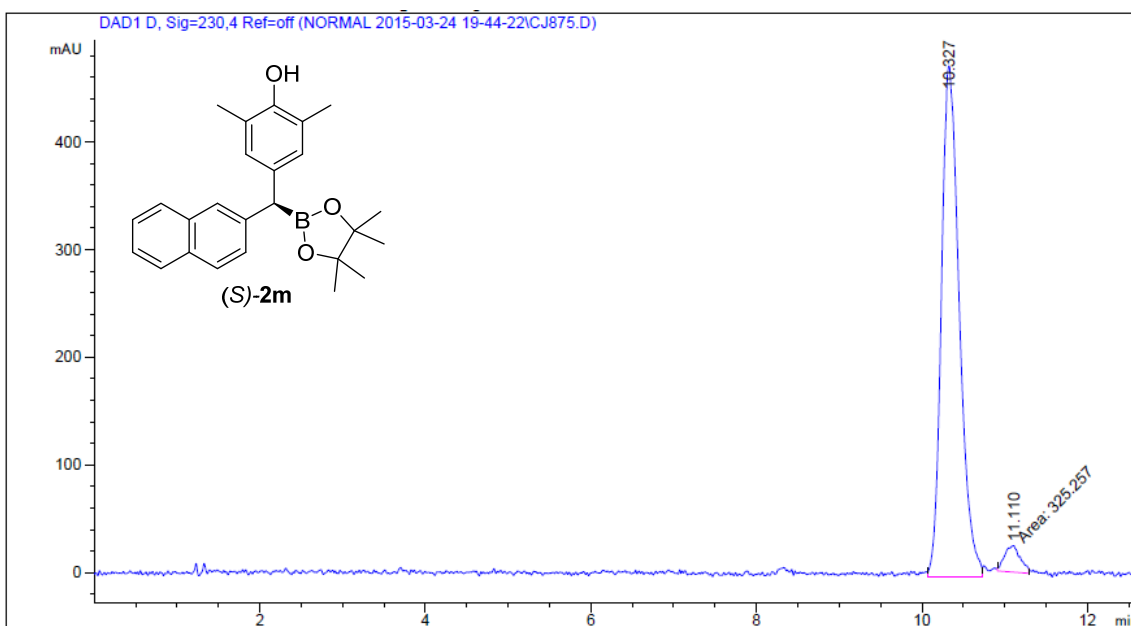

| Peak # | RetTime [min] | Type | Width [min] | Area [mAU*s] | Height [mAU] | Area %  |
|--------|---------------|------|-------------|--------------|--------------|---------|
| 1      | 10.327        | VV   | 0.1893      | 7134.89600   | 474.75522    | 95.6401 |
| 2      | 11.110        | MM   | 0.2189      | 325.25656    | 24.76440     | 4.3599  |

Figure S65: SFC chromatogram of compound 2m.

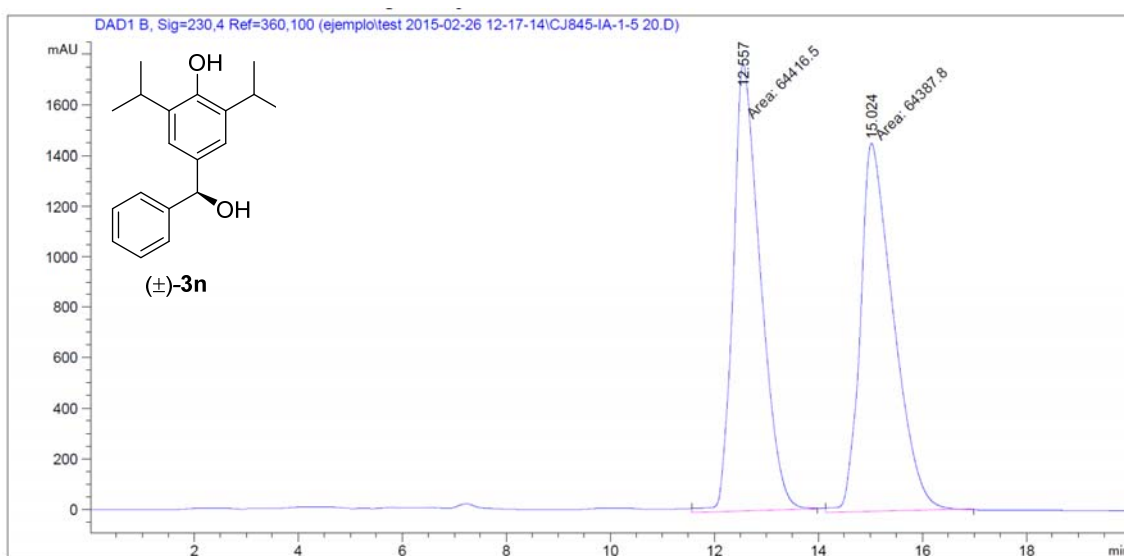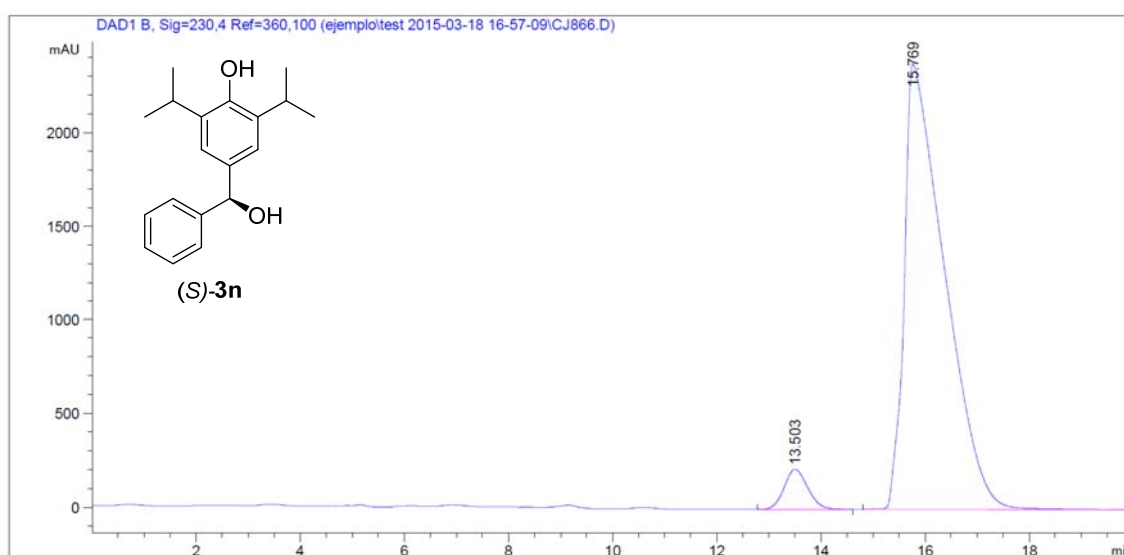

| Peak # | RetTime [min] | Type | Width [min] | Area [mAU*s] | Height [mAU] | Area %  |
|--------|---------------|------|-------------|--------------|--------------|---------|
| 1      | 13.503        | BB   | 0.4523      | 6639.08887   | 212.02979    | 4.9577  |
| 2      | 15.769        | BBA  | 0.6273      | 1.27276e5    | 2374.75928   | 95.0423 |

Figure S66: HPLC chromatogram of compound **3n**.

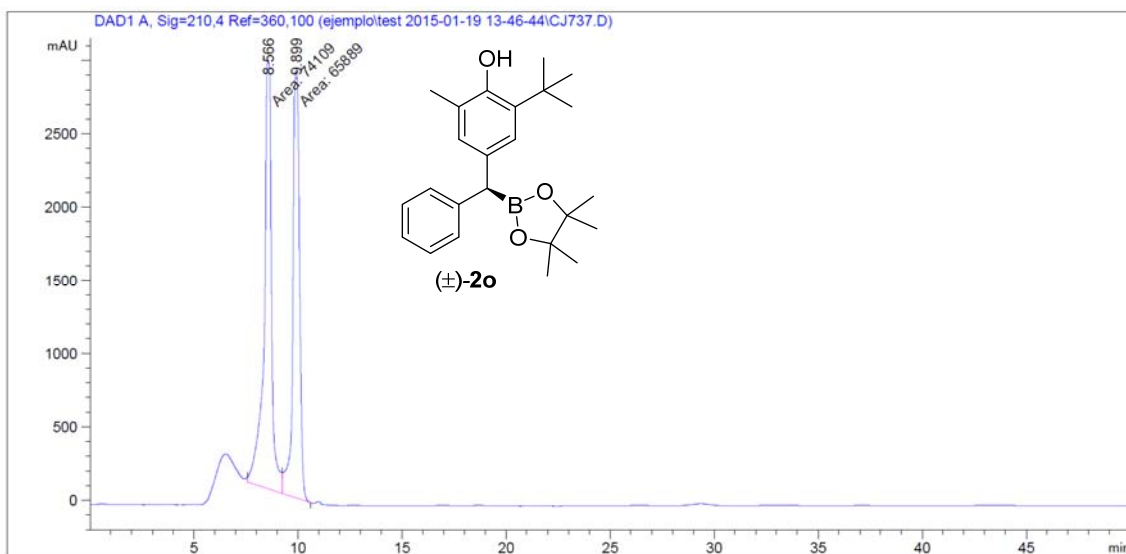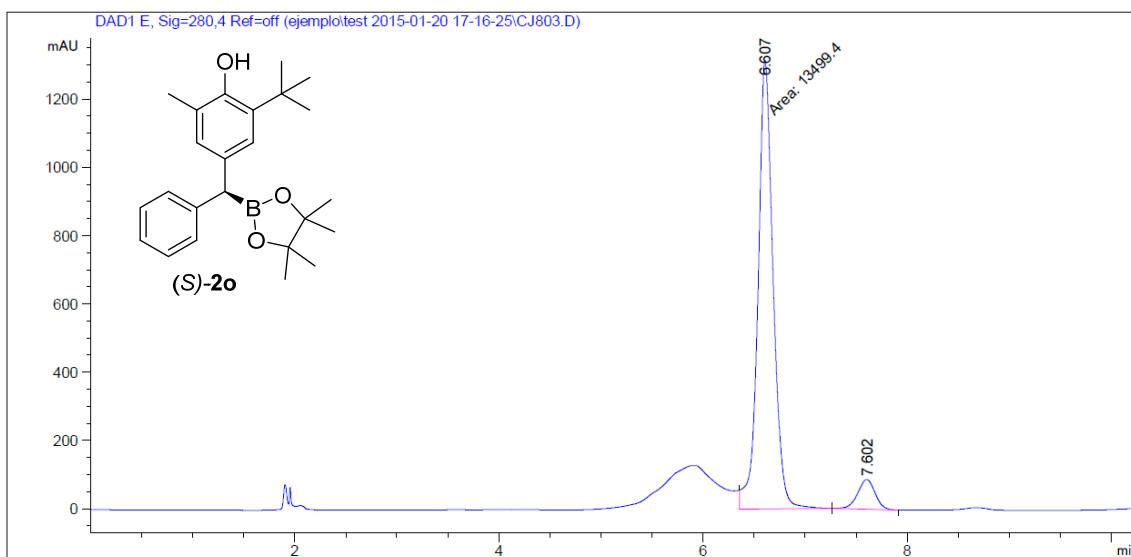

| Peak # | RetTime [min] | Type | Width [min] | Area [mAU*s] | Height [mAU] | Area %  |
|--------|---------------|------|-------------|--------------|--------------|---------|
| 1      | 6.607         | FM   | 0.1714      | 1.34994e4    | 1312.85229   | 92.8945 |
| 2      | 7.602         | BB   | 0.1828      | 1032.57776   | 87.12360     | 7.1055  |

Figure S67: HPLC chromatogram of compound **2o**.

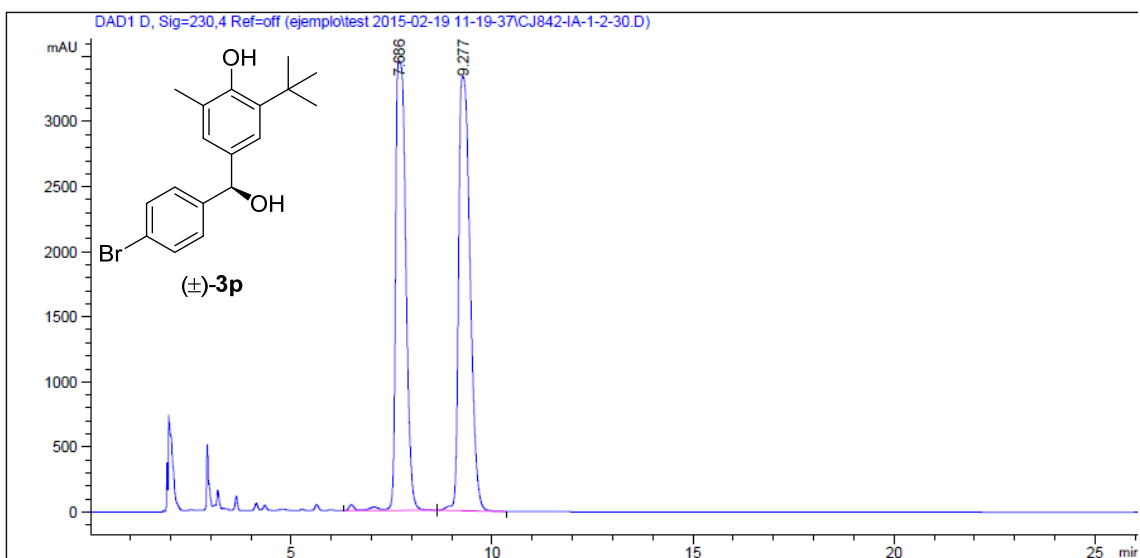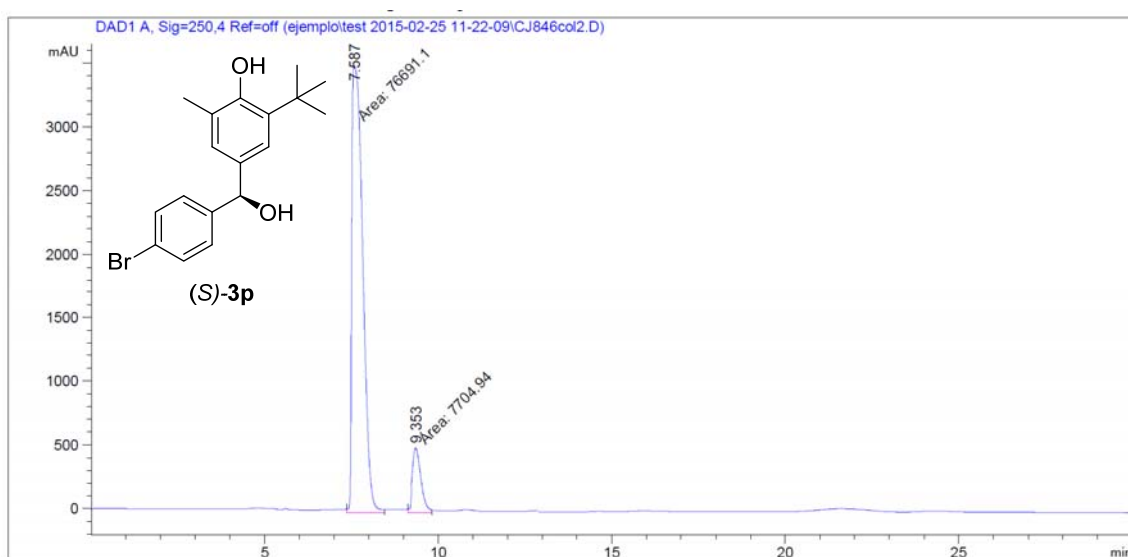

| Peak # | RetTime [min] | Type | Width [min] | Area [mAU*s] | Height [mAU] | Area %  |
|--------|---------------|------|-------------|--------------|--------------|---------|
| 1      | 7.587         | MM   | 0.3643      | 7.66911e4    | 3508.30688   | 90.8705 |
| 2      | 9.353         | MM   | 0.2747      | 7704.94385   | 467.54684    | 9.1295  |

Figure S68: HPLC chromatogram of compound **3p**.



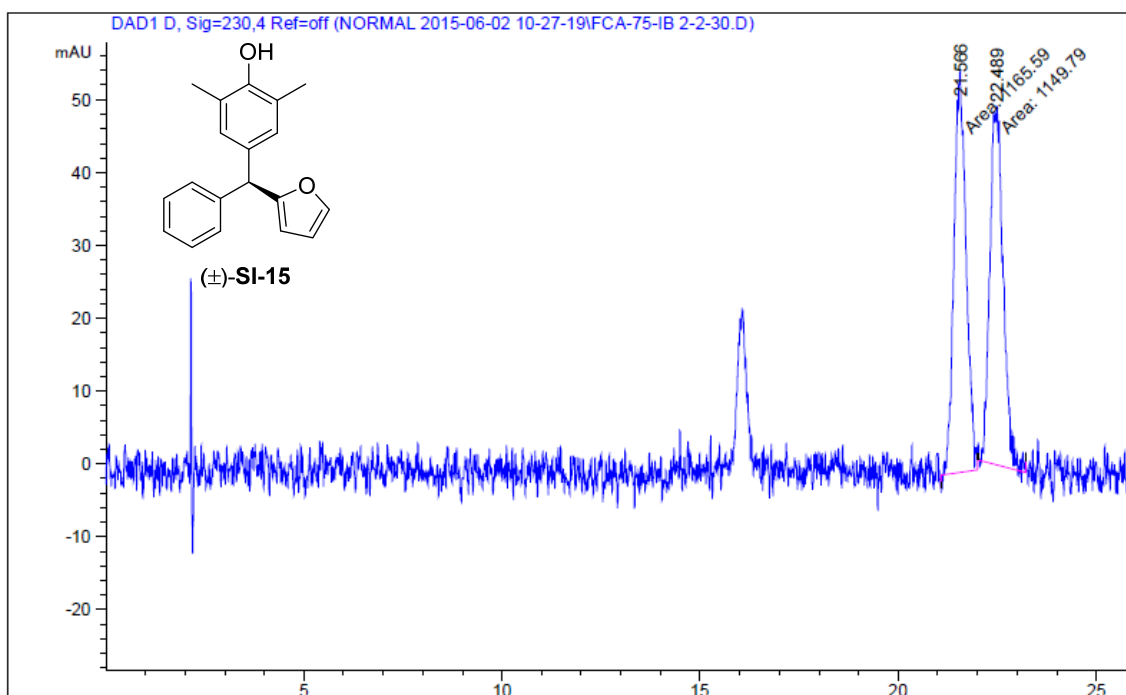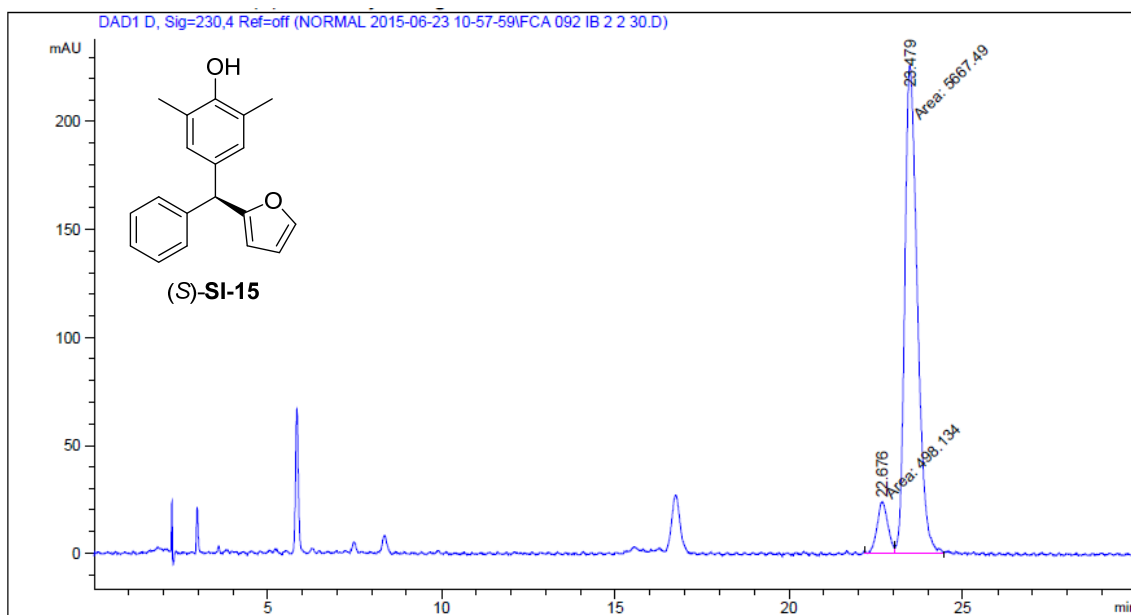

| Peak # | RetTime [min] | Type | Width [min] | Area [mAU*s] | Height [mAU] | Area %  |
|--------|---------------|------|-------------|--------------|--------------|---------|
| 1      | 22.676        | MF T | 0.3526      | 498.13400    | 23.54592     | 8.0792  |
| 2      | 23.479        | FM T | 0.4178      | 5667.49414   | 226.08917    | 91.9208 |

Figure S69: SFC chromatogram of compound SI-15.

## 8. X-Ray Data

A clear colorless prismatic-like specimen of  $C_{27}H_{38}BBrO_3$ , approximate dimensions 0.21 mm x 0.24 mm x 0.30 mm, was used for the X-ray crystallographic analysis. The X-ray intensity data were measured.

**Table S2: Data collection details for 2g.**<sup>15</sup>

| Axis  | dx/mm  | 2 $\theta$ /° | $\omega$ /° | $\phi$ /° | $\chi$ /° |
|-------|--------|---------------|-------------|-----------|-----------|
| Phi   | 34.827 | 18.00         | -16.85      | -283.14   | 30.74     |
| Omega | 34.827 | -17.00        | -55.25      | -64.55    | 54.19     |
| Omega | 34.827 | 3.00          | 1.55        | 28.75     | -87.66    |
| Omega | 34.827 | -9.50         | -5.74       | -14.60    | -56.93    |
| Omega | 34.827 | -17.00        | -62.26      | -180.02   | 48.94     |
| Phi   | 34.827 | -14.50        | 18.90       | -118.89   | -69.99    |

  

| Width/° | Frames | Time/s | Wavelength/Å | Voltage/kV | Current/mA | Temperature/K |
|---------|--------|--------|--------------|------------|------------|---------------|
| 0.50    | 611    | 10.00  | 0.71073      | 50         | 30.0       | n/a           |
| 0.50    | 79     | 10.00  | 0.71073      | 50         | 30.0       | n/a           |
| 0.50    | 77     | 10.00  | 0.71073      | 50         | 30.0       | n/a           |
| 0.50    | 85     | 10.00  | 0.71073      | 50         | 30.0       | n/a           |
| 0.50    | 93     | 10.00  | 0.71073      | 50         | 30.0       | n/a           |
| 0.50    | 184    | 10.00  | 0.71073      | 50         | 30.0       | n/a           |

A total of 1129 frames were collected. The total exposure time was 3.14 hours. The frames were integrated with the Bruker SAINT software package using a narrow-frame algorithm. The integration of the data using a trigonal unit cell yielded a total of 35365 reflections to a maximum  $\theta$  angle of 25.33 (0.83 Å resolution), of which 4945 were independent (average redundancy 7.152, completeness = 100.0%,  $R_{int}$  = 4.99%,  $R_{sig}$  = 3.83%) and 3510 (70.98%) were greater than  $2\sigma(F^2)$ . The final cell constants of  $a = 13.3911(3)$  Å,  $b = 13.3911(3)$  Å,  $c = 26.1903(7)$  Å, volume = 4067.28(17) Å<sup>3</sup>, are based upon the refinement of the XYZ-centroids of 6881 reflections above  $20 \sigma(I)$  with  $4.670 < 2\theta < 40.62$ . Data were corrected for absorption effects using the multi-scan method (SADABS). The ratio of minimum to maximum apparent transmission was 0.856. The calculated minimum and maximum transmission coefficients (based on crystal size) are 0.6552 and 0.7381.

The structure was solved and refined using the Bruker SHELXTL Software Package, using the space group P 32 2 1, with  $Z = 6$  for the formula unit,  $C_{27}H_{38}BBrO_3$ . The final anisotropic full-matrix least-squares refinement on  $F^2$  with 300 variables converged at  $R1 = 3.88\%$ , for the observed data and  $wR2 = 12.57\%$  for all data. The goodness-of-fit was 1.093. The largest peak in the final difference electron density synthesis was  $0.337 e^{-}/\text{Å}^3$  and the largest hole was  $-0.303 e^{-}/\text{Å}^3$  with an RMS deviation of  $0.107 e^{-}/\text{Å}^3$ . On the basis of the final model, the calculated density was  $1.228 \text{g}/\text{cm}^3$  and  $F(000)$ , 1584  $e^{-}$ .

<sup>15</sup> **CCDC 1405406** contains the supplementary crystallographic data. These data can be obtained free of charge at [www.ccdc.cam.ac.uk/conts/retrieving.html](http://www.ccdc.cam.ac.uk/conts/retrieving.html).

**Table S3. Sample and crystal data for 2k.**

|                               |                                                   |          |
|-------------------------------|---------------------------------------------------|----------|
| <b>Identification code</b>    | <b>2k</b>                                         |          |
| <b>Chemical formula</b>       | C <sub>27</sub> H <sub>38</sub> BBrO <sub>3</sub> |          |
| <b>Formula weight</b>         | 501.29                                            |          |
| <b>Temperature</b>            | 296(2) K                                          |          |
| <b>Wavelength</b>             | 0.71073 Å                                         |          |
| <b>Crystal size</b>           | 0.21 x 0.24 x 0.30 mm                             |          |
| <b>Crystal habit</b>          | clear colorless prismatic                         |          |
| <b>Crystal system</b>         | trigonal                                          |          |
| <b>Space group</b>            | P 32 2 1                                          |          |
| <b>Unit cell dimensions</b>   | a = 13.3911(3) Å                                  | α = 90°  |
|                               | b = 13.3911(3) Å                                  | β = 90°  |
|                               | c = 26.1903(7) Å                                  | γ = 120° |
| <b>Volume</b>                 | 4067.28(17) Å <sup>3</sup>                        |          |
| <b>Z</b>                      | 6                                                 |          |
| <b>Density (calculated)</b>   | 1.228 Mg/cm <sup>3</sup>                          |          |
| <b>Absorption coefficient</b> | 1.540 mm <sup>-1</sup>                            |          |
| <b>F(000)</b>                 | 1584                                              |          |

**Table S4. Data collection and structure refinement for 2k.**

|                                            |                                                                              |                              |
|--------------------------------------------|------------------------------------------------------------------------------|------------------------------|
| <b>Theta range for data collection</b>     | 1.76 to 25.33°                                                               |                              |
| <b>Index ranges</b>                        | -15 ≤ h ≤ 15, -16 ≤ k ≤ 16, -31 ≤ l ≤ 31                                     |                              |
| <b>Reflections collected</b>               | 35365                                                                        |                              |
| <b>Independent reflections</b>             | 4945 [R(int) = 0.0499]                                                       |                              |
| <b>Coverage of independent reflections</b> | 100.0%                                                                       |                              |
| <b>Absorption correction</b>               | multi-scan                                                                   |                              |
| <b>Max. and min. transmission</b>          | 0.7381 and 0.6552                                                            |                              |
| <b>Structure solution technique</b>        | direct methods                                                               |                              |
| <b>Structure solution program</b>          | SHELXS-97 (Sheldrick, 2008)                                                  |                              |
| <b>Refinement method</b>                   | Full-matrix least-squares on F <sup>2</sup>                                  |                              |
| <b>Refinement program</b>                  | SHELXL-97 (Sheldrick, 2008)                                                  |                              |
| <b>Function minimized</b>                  | Σ w(F <sub>o</sub> <sup>2</sup> - F <sub>c</sub> <sup>2</sup> ) <sup>2</sup> |                              |
| <b>Data / restraints / parameters</b>      | 4945 / 0 / 300                                                               |                              |
| <b>Goodness-of-fit on F<sup>2</sup></b>    | 1.093                                                                        |                              |
| <b>Δ/σ<sub>max</sub></b>                   | 0.002                                                                        |                              |
| <b>Final R indices</b>                     | 3510 data;<br>I > 2σ(I)                                                      | R1 = 0.0388, wR2 =<br>0.0943 |
|                                            | all data                                                                     | R1 = 0.0713, wR2 =<br>0.1257 |

|                                     |                                                                           |
|-------------------------------------|---------------------------------------------------------------------------|
| <b>Weighting scheme</b>             | $w=1/[\sigma^2(F_o^2)+(0.0689P)^2+0.3054P]$<br>where $P=(F_o^2+2F_c^2)/3$ |
| <b>Absolute structure parameter</b> | -0.0(0)                                                                   |
| <b>Largest diff. peak and hole</b>  | 0.337 and -0.303 eÅ <sup>-3</sup>                                         |
| <b>R.M.S. deviation from mean</b>   | 0.107 eÅ <sup>-3</sup>                                                    |

**Table S5. Atomic coordinates and equivalent isotropic atomic displacement parameters (Å<sup>2</sup>) for 2k.**  
U(eq) is defined as one third of the trace of the orthogonalized U<sub>ij</sub> tensor.

|     | x/a        | y/b        | z/c         | U(eq)      |
|-----|------------|------------|-------------|------------|
| Br1 | 0.60738(5) | 0.46624(4) | 0.06568(3)  | 0.0920(2)  |
| B1  | 0.7201(4)  | 0.3822(4)  | 0.97446(16) | 0.0428(10) |
| C1  | 0.5317(4)  | 0.3021(3)  | 0.06518(15) | 0.0497(9)  |
| C2  | 0.4200(4)  | 0.2421(5)  | 0.08450(18) | 0.0699(13) |
| C3  | 0.3624(4)  | 0.1241(5)  | 0.0844(2)   | 0.0767(14) |
| C4  | 0.4154(4)  | 0.0683(4)  | 0.06597(19) | 0.0736(13) |
| C5  | 0.5269(3)  | 0.1287(3)  | 0.04738(15) | 0.0536(10) |
| C6  | 0.5883(3)  | 0.2475(3)  | 0.04595(12) | 0.0389(8)  |
| C7  | 0.7729(3)  | 0.2491(3)  | 0.01789(12) | 0.0359(8)  |
| C8  | 0.7435(3)  | 0.1711(3)  | 0.97810(13) | 0.0403(8)  |
| C9  | 0.7993(3)  | 0.1102(3)  | 0.96880(14) | 0.0431(9)  |
| C10 | 0.8916(3)  | 0.1322(3)  | 0.00135(15) | 0.0495(10) |
| C11 | 0.9242(3)  | 0.2098(4)  | 0.04210(14) | 0.0495(10) |
| C12 | 0.8630(3)  | 0.2670(3)  | 0.04898(13) | 0.0426(9)  |
| C13 | 0.7639(4)  | 0.0250(3)  | 0.92377(16) | 0.0539(11) |
| C14 | 0.8586(5)  | 0.0730(4)  | 0.88344(18) | 0.0776(15) |
| C15 | 0.7401(5)  | 0.9063(4)  | 0.9410(2)   | 0.0900(17) |
| C16 | 0.6517(5)  | 0.0072(5)  | 0.8989(2)   | 0.0912(17) |
| C17 | 0.0222(4)  | 0.2296(5)  | 0.07897(17) | 0.0699(14) |
| C18 | 0.1343(5)  | 0.2709(7)  | 0.0512(2)   | 0.114(3)   |
| C19 | 0.9862(7)  | 0.1139(7)  | 0.1072(3)   | 0.131(3)   |
| C20 | 0.0415(5)  | 0.3197(6)  | 0.11907(19) | 0.103(2)   |
| C21 | 0.7111(3)  | 0.3173(3)  | 0.02575(12) | 0.0371(7)  |
| C22 | 0.6906(5)  | 0.4090(4)  | 0.89142(15) | 0.0656(13) |
| C23 | 0.7877(4)  | 0.5221(4)  | 0.91349(17) | 0.0663(13) |
| C24 | 0.7379(7)  | 0.3443(6)  | 0.8607(2)   | 0.119(2)   |
| C25 | 0.5977(5)  | 0.4163(6)  | 0.8621(2)   | 0.106(2)   |
| C26 | 0.7474(6)  | 0.6070(4)  | 0.9273(2)   | 0.0869(17) |
| C27 | 0.8972(5)  | 0.5838(6)  | 0.8827(3)   | 0.118(2)   |
| O1  | 0.6384(2)  | 0.3377(2)  | 0.93709(9)  | 0.0542(7)  |
| O2  | 0.8139(2)  | 0.4845(2)  | 0.96159(11) | 0.0596(7)  |
| O3  | 0.9516(3)  | 0.0762(4)  | 0.99056(13) | 0.0844(11) |

**Table S6. Bond lengths (Å) for 2k**

|         |          |         |          |
|---------|----------|---------|----------|
| Br1-C1  | 1.906(4) | B1-O1   | 1.362(5) |
| B1-O2   | 1.359(5) | B1-C21  | 1.572(6) |
| C1-C6   | 1.385(5) | C1-C2   | 1.392(6) |
| C2-C3   | 1.369(7) | C3-C4   | 1.351(7) |
| C4-C5   | 1.383(6) | C5-C6   | 1.378(5) |
| C6-C21  | 1.523(5) | C7-C12  | 1.374(5) |
| C7-C8   | 1.386(5) | C7-C21  | 1.522(4) |
| C8-C9   | 1.374(5) | C9-C10  | 1.406(5) |
| C9-C13  | 1.542(5) | C10-O3  | 1.375(4) |
| C10-C11 | 1.398(5) | C11-C12 | 1.384(5) |
| C11-C17 | 1.542(5) | C13-C14 | 1.523(6) |
| C13-C16 | 1.542(7) | C13-C15 | 1.524(6) |
| C17-C18 | 1.503(7) | C17-C20 | 1.521(7) |
| C17-C19 | 1.559(8) | C22-O1  | 1.470(5) |
| C22-C25 | 1.506(7) | C22-C23 | 1.533(7) |
| C22-C24 | 1.532(7) | C23-O2  | 1.463(5) |
| C23-C27 | 1.508(7) | C23-C26 | 1.526(7) |

**Table S7. Bond angles (°) for 2k.**

|             |          |             |          |
|-------------|----------|-------------|----------|
| O1-B1-O2    | 113.4(3) | O1-B1-C21   | 123.3(4) |
| O2-B1-C21   | 123.1(3) | C6-C1-C2    | 122.8(4) |
| C6-C1-Br1   | 119.7(3) | C2-C1-Br1   | 117.5(3) |
| C3-C2-C1    | 119.2(4) | C4-C3-C2    | 119.4(4) |
| C3-C4-C5    | 121.0(5) | C4-C5-C6    | 122.1(4) |
| C5-C6-C1    | 115.5(3) | C5-C6-C21   | 123.8(3) |
| C1-C6-C21   | 120.7(3) | C12-C7-C8   | 118.1(3) |
| C12-C7-C21  | 120.6(3) | C8-C7-C21   | 121.3(3) |
| C9-C8-C7    | 123.1(3) | C8-C9-C10   | 116.7(3) |
| C8-C9-C13   | 121.2(3) | C10-C9-C13  | 122.1(3) |
| O3-C10-C11  | 120.8(3) | O3-C10-C9   | 116.9(3) |
| C11-C10-C9  | 122.2(3) | C12-C11-C10 | 117.3(3) |
| C12-C11-C17 | 120.8(3) | C10-C11-C17 | 121.9(3) |
| C7-C12-C11  | 122.5(3) | C14-C13-C16 | 108.2(4) |
| C14-C13-C15 | 110.0(4) | C16-C13-C15 | 106.5(4) |
| C14-C13-C9  | 109.6(3) | C16-C13-C9  | 110.6(3) |
| C15-C13-C9  | 111.9(4) | C18-C17-C20 | 107.4(5) |
| C18-C17-C11 | 111.6(4) | C20-C17-C11 | 111.2(3) |
| C18-C17-C19 | 110.5(5) | C20-C17-C19 | 107.9(5) |
| C11-C17-C19 | 108.2(4) | C7-C21-C6   | 115.0(3) |
| C7-C21-B1   | 107.6(3) | C6-C21-B1   | 113.4(3) |
| O1-C22-C25  | 108.5(4) | O1-C22-C23  | 103.1(3) |
| C25-C22-C23 | 116.6(4) | O1-C22-C24  | 104.9(4) |
| C25-C22-C24 | 111.0(5) | C23-C22-C24 | 111.7(5) |

|             |          |             |          |
|-------------|----------|-------------|----------|
| O2-C23-C27  | 108.4(4) | O2-C23-C26  | 106.7(4) |
| C27-C23-C26 | 109.2(4) | O2-C23-C22  | 102.4(3) |
| C27-C23-C22 | 116.8(5) | C26-C23-C22 | 112.6(4) |
| B1-O1-C22   | 106.5(3) | B1-O2-C23   | 107.5(3) |

**Table S8. Anisotropic atomic displacement parameters ( $\text{\AA}^2$ ) for 2k.**

The anisotropic atomic displacement factor exponent takes the form:  $-2\pi^2 [ h^2 a^{*2} U_{11} + \dots + 2 h k a^* b^* U_{12} ]$

|     | $U_{11}$   | $U_{22}$   | $U_{33}$   | $U_{23}$                | $U_{13}$                | $U_{12}$   |
|-----|------------|------------|------------|-------------------------|-------------------------|------------|
| Br1 | 0.0949(4)  | 0.0625(3)  | 0.1358(5)  | 0.0029(3)               | 0.0423(4)               | 0.0522(3)  |
| B1  | 0.044(2)   | 0.054(3)   | 0.044(2)   | 0.004(2)                | 0.007(2)                | 0.035(2)   |
| C1  | 0.051(2)   | 0.057(2)   | 0.049(2)   | 0.0031(19)              | 0.0065(19)              | 0.034(2)   |
| C2  | 0.058(3)   | 0.102(4)   | 0.067(3)   | 0.000(3)                | 0.015(2)                | 0.052(3)   |
| C3  | 0.045(2)   | 0.078(4)   | 0.088(4)   | 0.009(3)                | 0.018(2)                | 0.017(3)   |
| C4  | 0.062(3)   | 0.062(3)   | 0.084(3)   | 0.006(3)                | 0.015(3)                | 0.020(3)   |
| C5  | 0.051(2)   | 0.049(2)   | 0.057(2)   | 0.0016(19)              | 0.009(2)                | 0.021(2)   |
| C6  | 0.0415(19) | 0.052(2)   | 0.0308(18) | 0.0013(16)              | <sup>-</sup> 0.0026(15) | 0.0290(18) |
| C7  | 0.0382(18) | 0.0417(19) | 0.0348(19) | 0.0017(15)              | 0.0021(15)              | 0.0251(16) |
| C8  | 0.040(2)   | 0.044(2)   | 0.039(2)   | <sup>-</sup> 0.0033(16) | <sup>-</sup> 0.0034(16) | 0.0236(17) |
| C9  | 0.052(2)   | 0.048(2)   | 0.035(2)   | <sup>-</sup> 0.0022(17) | 0.0006(17)              | 0.0291(19) |
| C10 | 0.056(2)   | 0.069(3)   | 0.044(2)   | <sup>-</sup> 0.0057(19) | <sup>-</sup> 0.0034(18) | 0.046(2)   |
| C11 | 0.053(2)   | 0.073(3)   | 0.040(2)   | -0.005(2)               | <sup>-</sup> 0.0040(18) | 0.045(2)   |
| C12 | 0.047(2)   | 0.058(2)   | 0.033(2)   | <sup>-</sup> 0.0080(17) | <sup>-</sup> 0.0024(16) | 0.0337(19) |
| C13 | 0.061(3)   | 0.044(2)   | 0.057(3)   | -0.013(2)               | -0.004(2)               | 0.027(2)   |
| C14 | 0.096(4)   | 0.069(3)   | 0.060(3)   | -0.023(2)               | 0.010(3)                | 0.035(3)   |
| C15 | 0.112(5)   | 0.049(3)   | 0.105(4)   | -0.008(3)               | 0.001(3)                | 0.037(3)   |
| C16 | 0.093(4)   | 0.092(4)   | 0.094(4)   | -0.055(3)               | -0.047(3)               | 0.050(3)   |
| C17 | 0.075(3)   | 0.115(4)   | 0.054(3)   | -0.021(3)               | -0.025(3)               | 0.073(3)   |
| C18 | 0.070(3)   | 0.209(8)   | 0.093(4)   | -0.053(4)               | -0.028(3)               | 0.092(4)   |
| C19 | 0.180(7)   | 0.169(7)   | 0.102(5)   | -0.010(5)               | -0.070(5)               | 0.130(6)   |
| C20 | 0.102(4)   | 0.187(7)   | 0.064(3)   | -0.060(4)               | -0.049(3)               | 0.106(5)   |
| C21 | 0.0393(18) | 0.045(2)   | 0.0350(19) | <sup>-</sup> 0.0019(16) | <sup>-</sup> 0.0003(14) | 0.0267(17) |
| C22 | 0.100(4)   | 0.076(3)   | 0.038(2)   | 0.012(2)                | 0.005(2)                | 0.057(3)   |
| C23 | 0.070(3)   | 0.078(3)   | 0.055(3)   | 0.028(2)                | 0.010(2)                | 0.040(3)   |
| C24 | 0.211(8)   | 0.135(6)   | 0.058(3)   | 0.010(4)                | 0.032(4)                | 0.122(6)   |
| C25 | 0.116(5)   | 0.107(5)   | 0.090(4)   | 0.021(3)                | -0.035(4)               | 0.052(4)   |
| C26 | 0.127(5)   | 0.075(3)   | 0.081(4)   | 0.009(3)                | -0.002(3)               | 0.068(3)   |
| C27 | 0.098(4)   | 0.134(6)   | 0.118(5)   | 0.072(4)                | 0.054(4)                | 0.054(4)   |
| O1  | 0.0595(17) | 0.0620(15) | 0.0428(15) | 0.0072(13)              | <sup>-</sup> 0.0039(14) | 0.0316(14) |

|    | U <sub>11</sub> | U <sub>22</sub> | U <sub>33</sub> | U <sub>23</sub> | U <sub>13</sub> | U <sub>12</sub> |
|----|-----------------|-----------------|-----------------|-----------------|-----------------|-----------------|
| O2 | 0.0477(16)      | 0.0666(18)      | 0.0619(19)      | 0.0228(15)      | 0.0033(13)      | 0.0266(15)      |
| O3 | 0.102(3)        | 0.118(3)        | 0.088(2)        | -0.033(2)       | -0.023(2)       | 0.095(2)        |

**Table S9. Hydrogen atomic coordinates and isotropic atomic displacement parameters ( $\text{\AA}^2$ ) for 2k.**

|      | x/a    | y/b     | z/c    | U(eq) |
|------|--------|---------|--------|-------|
| H2   | 0.3849 | 0.2818  | 1.0973 | 0.084 |
| H3A  | 0.2875 | 0.0827  | 1.0969 | 0.092 |
| H4   | 0.3763 | -0.0118 | 1.0658 | 0.088 |
| H5   | 0.5615 | 0.0878  | 1.0355 | 0.064 |
| H8   | 0.6832 | 0.1593  | 0.9567 | 0.048 |
| H12  | 0.8837 | 0.3194  | 1.0757 | 0.051 |
| H14A | 0.8746 | 0.1487  | 0.8735 | 0.116 |
| H14B | 0.8336 | 0.0232  | 0.8542 | 0.116 |
| H14C | 0.9271 | 0.0775  | 0.8972 | 0.116 |
| H15A | 0.8049 | -0.0859 | 0.9599 | 0.135 |
| H15B | 0.7276 | -0.1414 | 0.9116 | 0.135 |
| H15C | 0.6726 | -0.1285 | 0.9622 | 0.135 |
| H16A | 0.5923 | -0.0183 | 0.9243 | 0.137 |
| H16B | 0.6283 | -0.0499 | 0.8725 | 0.137 |
| H16C | 0.6649 | 0.0787  | 0.8845 | 0.137 |
| H18A | 1.1243 | 0.2169  | 1.0248 | 0.171 |
| H18B | 1.1920 | 0.2770  | 1.0748 | 0.171 |
| H18C | 1.1584 | 0.3450  | 1.0363 | 0.171 |
| H19A | 0.9613 | 0.0528  | 1.0826 | 0.197 |
| H19B | 0.9243 | 0.0972  | 1.1304 | 0.197 |
| H19C | 1.0509 | 0.1206  | 1.1259 | 0.197 |
| H20A | 1.1039 | 0.3316  | 1.1410 | 0.154 |
| H20B | 0.9726 | 0.2935  | 1.1390 | 0.154 |
| H20C | 1.0601 | 0.3909  | 1.1025 | 0.154 |
| H21  | 0.7553 | 0.3766  | 1.0514 | 0.045 |
| H24A | 0.7985 | 0.3427  | 0.8797 | 0.178 |
| H24B | 0.7679 | 0.3829  | 0.8287 | 0.178 |
| H24C | 0.6771 | 0.2668  | 0.8544 | 0.178 |
| H25A | 0.5428 | 0.3413  | 0.8494 | 0.159 |
| H25B | 0.6316 | 0.4687  | 0.8340 | 0.159 |
| H25C | 0.5594 | 0.4436  | 0.8843 | 0.159 |
| H26A | 0.6742 | 0.5667  | 0.9444 | 0.13  |
| H26B | 0.7395 | 0.6421  | 0.8967 | 0.13  |
| H26C | 0.8029 | 0.6656  | 0.9494 | 0.13  |
| H27A | 0.9512 | 0.6534  | 0.8999 | 0.178 |
| H27B | 0.8802 | 0.6025  | 0.8496 | 0.178 |
| H27C | 0.9300 | 0.5348  | 0.8788 | 0.178 |
| H3   | 0.9931 | 0.0826  | 1.0148 | 0.127 |

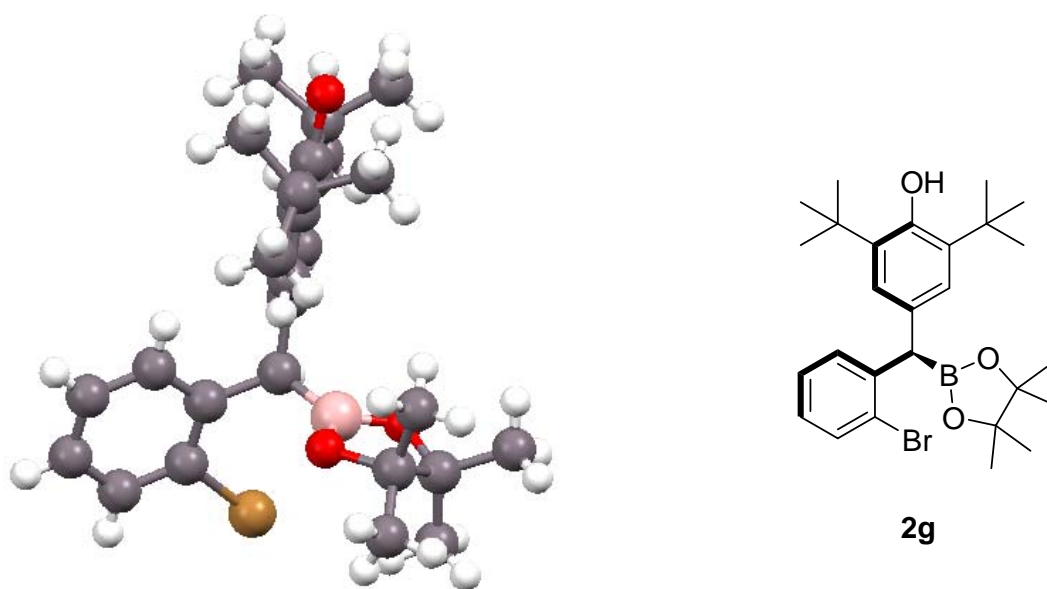

Figure S70. X-ray Structure of (*R*)-**2g**

## 9. DFT Calculations

Calculations were performed with the GAUSSIAN 09 series of programs.<sup>16</sup> The geometries of all complexes were optimized at the DFT level using the B3LYP hybrid functional,<sup>17</sup> using the standard 6-31G\* basis set for C, H, P, B and O. The LANL2DZ basis set, which includes the relativistic effective core potential (ECP) of Hay and Wadt and employs a split-valence (double- $\zeta$ ) basis set, was used for Cu.<sup>18</sup> Harmonic frequencies were calculated at the same level of theory to characterize the stationary points and to determine the Free Energies ( $\Delta G$ ). The starting approximate geometries for the transition states (TS) were graphically located. Intrinsic reaction coordinate (IRC) studies using the default step

<sup>16</sup> Gaussian 09, Revision D.01, M. J. Frisch, G. W. Trucks, H. B. Schlegel, G. E. Scuseria, M. A. Robb, J. R. Cheeseman, G. Scalmani, V. Barone, B. Mennucci, G. A. Petersson, H. Nakatsuji, M. Caricato, X. Li, H. P. Hratchian, A. F. Izmaylov, J. Bloino, G. Zheng, J. L. Sonnenberg, M. Hada, M. Ehara, K. Toyota, R. Fukuda, J. Hasegawa, M. Ishida, T. Nakajima, Y. Honda, O. Kitao, H. Nakai, T. Vreven, J. A. Montgomery, Jr., J. E. Peralta, F. Ogliaro, M. Bearpark, J. J. Heyd, E. Brothers, K. N. Kudin, V. N. Staroverov, T. Keith, R. Kobayashi, J. Normand, K. Raghavachari, A. Rendell, J. C. Burant, S. S. Iyengar, J. Tomasi, M. Cossi, N. Rega, J. M. Millam, M. Klene, J. E. Knox, J. B. Cross, V. Bakken, C. Adamo, J. Jaramillo, R. Gomperts, R. E. Stratmann, O. Yazyev, A. J. Austin, R. Cammi, C. Pomelli, J. W. Ochterski, R. L. Martin, K. Morokuma, V. G. Zakrzewski, G. A. Voth, P. Salvador, J. J. Dannenberg, S. Dapprich, A. D. Daniels, O. Farkas, J. B. Foresman, J. V. Ortiz, J. Cioslowski, and D. J. Fox, Gaussian, Inc., Wallingford CT, 2013.

<sup>17</sup> a) P. J. Stephens, F. J. Devlin, C. F. Chabalowski, M. J. Frisch, *J. Phys. Chem.* **1994**, *98*, 11623-11627; b) W. Kohn, A. D. Becke, R. G. Parr, *J. Phys. Chem.* **1996**, *100*, 12974-12980; c) P. J. Hay, W. R. Wadt, *J. Chem. Phys.* **1985**, *82*, 270-283; d) P. J. Hay, W. R. Wadt, *J. Chem. Phys.* **1985**, *82*, 284-298; e) P. J. Hay, W. R. Wadt, *J. Chem. Phys.* **1985**, *82*, 299-310.

<sup>18</sup> a) A. D. Becke, *J. Chem. Phys.* **1993**, *98*, 5648-5653; b) A. D. Becke, *Phys. Rev. A* **1988**, *38*, 3098-3100; c) C. Lee, W. Yang, R. G. Parr, *Phys. Rev. B* **1988**, *37*, 785-789.



size were performed to confirm the relation of the transition states with the corresponding minima.

**1i** (Scheme 4, main manuscript)

Standard orientation:

| Center Number | Atomic Number | Atomic Type | Coordinates (Angstroms) |           |           |
|---------------|---------------|-------------|-------------------------|-----------|-----------|
|               |               |             | X                       | Y         | Z         |
| 1             | 6             | 0           | -2.785545               | -1.069302 | 0.111739  |
| 2             | 6             | 0           | -1.508255               | -1.518572 | 0.099513  |
| 3             | 6             | 0           | -3.051140               | 0.382591  | -0.020568 |
| 4             | 6             | 0           | -0.357437               | -0.633231 | -0.007849 |
| 5             | 6             | 0           | -3.981850               | -1.966315 | 0.254570  |
| 6             | 8             | 0           | -4.203552               | 0.825726  | -0.004593 |
| 7             | 6             | 0           | -1.887362               | 1.285670  | -0.202819 |
| 8             | 6             | 0           | 0.895994                | -1.186740 | 0.036272  |
| 9             | 6             | 0           | -0.628167               | 0.784195  | -0.190869 |
| 10            | 6             | 0           | -2.194414               | 2.740176  | -0.417829 |
| 11            | 6             | 0           | 2.210638                | -0.548538 | 0.057106  |
| 12            | 6             | 0           | 3.295513                | -1.232660 | -0.531215 |
| 13            | 6             | 0           | 2.470664                | 0.689815  | 0.680640  |
| 14            | 6             | 0           | 4.572786                | -0.680458 | -0.546024 |
| 15            | 6             | 0           | 3.752212                | 1.236205  | 0.673417  |
| 16            | 6             | 0           | 4.805786                | 0.560985  | 0.052264  |
| 17            | 1             | 0           | -1.307886               | -2.584031 | 0.203566  |
| 18            | 1             | 0           | -4.569942               | -1.691927 | 1.138195  |
| 19            | 1             | 0           | -3.685673               | -3.016533 | 0.339086  |
| 20            | 1             | 0           | -4.654920               | -1.855511 | -0.603672 |
| 21            | 1             | 0           | 0.931644                | -2.276538 | 0.038436  |
| 22            | 1             | 0           | 0.211554                | 1.449015  | -0.367064 |
| 23            | 1             | 0           | -1.280248               | 3.326023  | -0.554883 |
| 24            | 1             | 0           | -2.753452               | 3.147084  | 0.432951  |
| 25            | 1             | 0           | -2.837975               | 2.876186  | -1.294868 |
| 26            | 1             | 0           | 3.119926                | -2.200553 | -0.994569 |
| 27            | 1             | 0           | 1.674283                | 1.201163  | 1.210367  |
| 28            | 1             | 0           | 5.388885                | -1.220465 | -1.018269 |
| 29            | 1             | 0           | 3.931868                | 2.187084  | 1.167715  |
| 30            | 1             | 0           | 5.803804                | 0.990284  | 0.049663  |

|                                              |             |
|----------------------------------------------|-------------|
| Zero-point correction=                       | 0.247160    |
| (Hartree/Particle)                           |             |
| Thermal correction to Energy=                | 0.261379    |
| Thermal correction to Enthalpy=              | 0.262323    |
| Thermal correction to Gibbs Free Energy=     | 0.205571    |
| Sum of electronic and zero-point Energies=   | -654.981276 |
| Sum of electronic and thermal Energies=      | -654.967057 |
| Sum of electronic and thermal Enthalpies=    | -654.966112 |
| Sum of electronic and thermal Free Energies= | -655.022865 |

**D** (Scheme 4, main manuscript)

Standard orientation:

| Center<br>Number | Atomic<br>Number | Atomic<br>Type | Coordinates (Angstroms) |           |           |
|------------------|------------------|----------------|-------------------------|-----------|-----------|
|                  |                  |                | X                       | Y         | Z         |
| 1                | 8                | 0              | 4.306255                | 1.214765  | -0.626671 |
| 2                | 8                | 0              | 4.079536                | -0.794274 | 0.422675  |
| 3                | 6                | 0              | 5.591954                | 0.957098  | -0.003388 |
| 4                | 6                | 0              | 5.510645                | -0.580818 | 0.307650  |
| 5                | 6                | 0              | 6.697310                | 1.370116  | -0.976299 |
| 6                | 6                | 0              | 5.659209                | 1.830620  | 1.259339  |
| 7                | 6                | 0              | 6.001241                | -1.465475 | -0.849301 |
| 8                | 6                | 0              | 6.177009                | -1.020022 | 1.612442  |
| 9                | 5                | 0              | 3.395792                | 0.221430  | -0.254602 |
| 10               | 29               | 0              | 1.390909                | 0.195382  | -0.589418 |
| 11               | 15               | 0              | -0.334177               | 1.936484  | -0.405008 |
| 12               | 6                | 0              | 0.388137                | 3.604200  | -0.047326 |
| 13               | 6                | 0              | 1.786500                | 3.729746  | -0.055081 |
| 14               | 6                | 0              | 2.383027                | 4.969188  | 0.193884  |
| 15               | 6                | 0              | -0.397299               | 4.742404  | 0.202949  |
| 16               | 6                | 0              | -1.801610               | 2.373302  | -1.439687 |
| 17               | 6                | 0              | 1.595574                | 6.091930  | 0.448198  |
| 18               | 6                | 0              | 0.202371                | 5.976318  | 0.451131  |
| 19               | 6                | 0              | -1.636890               | 2.344122  | -2.833304 |
| 20               | 6                | 0              | -3.039986               | 2.771936  | -0.913013 |
| 21               | 6                | 0              | -4.084641               | 3.139516  | -1.763186 |
| 22               | 6                | 0              | -1.011721               | 1.361434  | 1.221363  |
| 23               | 6                | 0              | -2.680103               | 2.716915  | -3.682171 |
| 24               | 6                | 0              | -3.906901               | 3.116030  | -3.148294 |
| 25               | 6                | 0              | -0.517237               | 1.949774  | 2.394876  |
| 26               | 6                | 0              | -1.847654               | 0.199272  | 1.308601  |
| 27               | 6                | 0              | -0.806632               | 1.459286  | 3.679913  |
| 28               | 6                | 0              | -2.118514               | -0.251076 | 2.591699  |
| 29               | 6                | 0              | -1.609864               | 0.342656  | 3.744834  |
| 30               | 8                | 0              | -2.067826               | -0.325746 | 4.852287  |
| 31               | 8                | 0              | -2.927568               | -1.307028 | 2.945229  |
| 32               | 6                | 0              | -2.698747               | -1.506038 | 4.342529  |
| 33               | 15               | 0              | -0.102103               | -1.712189 | -0.614875 |
| 34               | 6                | 0              | 0.274382                | -2.798916 | -2.057831 |
| 35               | 6                | 0              | 0.144293                | -4.195965 | -2.034983 |
| 36               | 6                | 0              | 0.461549                | -4.954393 | -3.163536 |
| 37               | 6                | 0              | 0.743628                | -2.180641 | -3.228397 |
| 38               | 6                | 0              | 0.121197                | -2.819093 | 0.843172  |
| 39               | 6                | 0              | 0.912211                | -4.327777 | -4.327486 |
| 40               | 6                | 0              | 1.053182                | -2.938738 | -4.358234 |
| 41               | 6                | 0              | 1.400049                | -2.870008 | 1.425796  |
| 42               | 6                | 0              | -0.912374               | -3.599300 | 1.384624  |
| 43               | 6                | 0              | -0.669953               | -4.425474 | 2.484858  |
| 44               | 6                | 0              | -1.927355               | -1.440957 | -0.720215 |
| 45               | 6                | 0              | 1.636003                | -3.701954 | 2.521897  |
| 46               | 6                | 0              | 0.604856                | -4.479507 | 3.054039  |
| 47               | 6                | 0              | -2.702820               | -2.080256 | -1.696875 |
| 48               | 6                | 0              | -2.532573               | -0.507024 | 0.177425  |
| 49               | 6                | 0              | -4.084189               | -1.858566 | -1.835541 |
| 50               | 6                | 0              | -3.899581               | -0.333753 | 0.030639  |
| 51               | 6                | 0              | -4.656823               | -0.977156 | -0.945061 |
| 52               | 8                | 0              | -5.966040               | -0.575848 | -0.859244 |
| 53               | 8                | 0              | -4.714668               | 0.497887  | 0.763909  |
| 54               | 6                | 0              | -6.047243               | 0.220503  | 0.327382  |

|    |   |   |           |           |           |
|----|---|---|-----------|-----------|-----------|
| 55 | 1 | 0 | 6.595957  | 0.864752  | -1.939495 |
| 56 | 1 | 0 | 7.690015  | 1.146428  | -0.566232 |
| 57 | 1 | 0 | 6.642443  | 2.449116  | -1.156882 |
| 58 | 1 | 0 | 4.868007  | 1.561367  | 1.965734  |
| 59 | 1 | 0 | 5.513523  | 2.877840  | 0.973776  |
| 60 | 1 | 0 | 6.626821  | 1.745291  | 1.767143  |
| 61 | 1 | 0 | 5.723204  | -2.504105 | -0.642495 |
| 62 | 1 | 0 | 7.089668  | -1.418151 | -0.970584 |
| 63 | 1 | 0 | 5.530398  | -1.174107 | -1.793119 |
| 64 | 1 | 0 | 6.037644  | -2.097742 | 1.751276  |
| 65 | 1 | 0 | 5.743933  | -0.511658 | 2.477316  |
| 66 | 1 | 0 | 7.255473  | -0.820114 | 1.593446  |
| 67 | 1 | 0 | 2.408431  | 2.861073  | -0.254922 |
| 68 | 1 | 0 | 3.466660  | 5.051669  | 0.182303  |
| 69 | 1 | 0 | -1.480416 | 4.668888  | 0.195013  |
| 70 | 1 | 0 | 2.061811  | 7.055466  | 0.638037  |
| 71 | 1 | 0 | -0.417492 | 6.848665  | 0.642302  |
| 72 | 1 | 0 | -0.685240 | 2.028497  | -3.254571 |
| 73 | 1 | 0 | -3.195611 | 2.778482  | 0.161539  |
| 74 | 1 | 0 | -5.038067 | 3.449261  | -1.342010 |
| 75 | 1 | 0 | -2.535849 | 2.690566  | -4.759021 |
| 76 | 1 | 0 | -4.721682 | 3.402694  | -3.807891 |
| 77 | 1 | 0 | 0.124433  | 2.819492  | 2.316128  |
| 78 | 1 | 0 | -0.413795 | 1.934571  | 4.571969  |
| 79 | 1 | 0 | -3.655362 | -1.653078 | 4.849975  |
| 80 | 1 | 0 | -2.032366 | -2.368543 | 4.483145  |
| 81 | 1 | 0 | -0.197405 | -4.692681 | -1.131780 |
| 82 | 1 | 0 | 0.359929  | -6.036121 | -3.131426 |
| 83 | 1 | 0 | 0.880758  | -1.102071 | -3.246819 |
| 84 | 1 | 0 | 1.161702  | -4.920520 | -5.203626 |
| 85 | 1 | 0 | 1.416043  | -2.445832 | -5.256222 |
| 86 | 1 | 0 | 2.206589  | -2.257660 | 1.028206  |
| 87 | 1 | 0 | -1.908034 | -3.556307 | 0.953576  |
| 88 | 1 | 0 | -1.476280 | -5.031105 | 2.891809  |
| 89 | 1 | 0 | 2.628037  | -3.734062 | 2.964477  |
| 90 | 1 | 0 | 0.792429  | -5.123377 | 3.909665  |
| 91 | 1 | 0 | -2.227647 | -2.783101 | -2.371144 |
| 92 | 1 | 0 | -4.669213 | -2.360359 | -2.598493 |
| 93 | 1 | 0 | -6.580344 | -0.339481 | 1.108544  |
| 94 | 1 | 0 | -6.559448 | 1.159589  | 0.100065  |

---

Zero-point correction= 0.743302  
(Hartree/Particle)  
Thermal correction to Energy= 0.793201  
Thermal correction to Enthalpy= 0.794145  
Thermal correction to Gibbs Free Energy= 0.654149  
Sum of electronic and zero-point Energies= -3055.114823  
Sum of electronic and thermal Energies= -3055.064924  
Sum of electronic and thermal Enthalpies= -3055.063980  
Sum of electronic and thermal Free Energies= -3055.203976

I<sub>5</sub> (Scheme 4, main manuscript)

Standard orientation:

| Center<br>Number | Atomic<br>Number | Atomic<br>Type | Coordinates (Angstroms) |           |           |
|------------------|------------------|----------------|-------------------------|-----------|-----------|
|                  |                  |                | X                       | Y         | Z         |
| 1                | 15               | 0              | 0.715523                | -0.696650 | 1.712311  |
| 2                | 6                | 0              | -0.418054               | -0.150201 | 3.062800  |
| 3                | 6                | 0              | -1.089782               | 1.071989  | 2.885107  |
| 4                | 6                | 0              | -1.936731               | 1.568749  | 3.875531  |
| 5                | 6                | 0              | -0.647896               | -0.882553 | 4.236028  |
| 6                | 6                | 0              | 1.235130                | -2.401769 | 2.187777  |
| 7                | 6                | 0              | -2.152623               | 0.834655  | 5.045912  |
| 8                | 6                | 0              | -1.514997               | -0.394589 | 5.217548  |
| 9                | 6                | 0              | 0.609272                | -3.485844 | 1.549204  |
| 10               | 6                | 0              | 2.234442                | -2.650513 | 3.142827  |
| 11               | 6                | 0              | 2.590733                | -3.960907 | 3.466628  |
| 12               | 6                | 0              | 2.230218                | 0.325397  | 2.013059  |
| 13               | 6                | 0              | 0.968620                | -4.794781 | 1.879401  |
| 14               | 6                | 0              | 1.956192                | -5.035534 | 2.836559  |
| 15               | 6                | 0              | 2.335582                | 1.161469  | 3.133142  |
| 16               | 6                | 0              | 3.285673                | 0.283486  | 1.051394  |
| 17               | 6                | 0              | 3.454825                | 1.978712  | 3.369419  |
| 18               | 6                | 0              | 4.381752                | 1.085873  | 1.325015  |
| 19               | 6                | 0              | 4.468371                | 1.916450  | 2.438640  |
| 20               | 8                | 0              | 5.653606                | 2.605389  | 2.417075  |
| 21               | 8                | 0              | 5.518085                | 1.225106  | 0.562421  |
| 22               | 6                | 0              | 6.387601                | 2.085249  | 1.303063  |
| 23               | 15               | 0              | 1.303552                | 0.767468  | -1.581445 |
| 24               | 6                | 0              | 1.046382                | 0.900732  | -3.412757 |
| 25               | 6                | 0              | 1.930786                | 1.584249  | -4.263865 |
| 26               | 6                | 0              | 1.676034                | 1.668334  | -5.632434 |
| 27               | 6                | 0              | -0.103400               | 0.311283  | -3.962288 |
| 28               | 6                | 0              | 1.977805                | 2.434472  | -1.166752 |
| 29               | 6                | 0              | 0.531924                | 1.073876  | -6.171751 |
| 30               | 6                | 0              | -0.355601               | 0.397211  | -5.334700 |
| 31               | 6                | 0              | 1.055613                | 3.385819  | -0.703913 |
| 32               | 6                | 0              | 3.315854                | 2.819370  | -1.345038 |
| 33               | 6                | 0              | 3.711695                | 4.131256  | -1.076284 |
| 34               | 6                | 0              | 2.700520                | -0.434912 | -1.400580 |
| 35               | 6                | 0              | 1.446563                | 4.702090  | -0.451245 |
| 36               | 6                | 0              | 2.779074                | 5.075066  | -0.636649 |
| 37               | 6                | 0              | 2.950644                | -1.330497 | -2.451010 |
| 38               | 6                | 0              | 3.355066                | -0.621629 | -0.139969 |
| 39               | 6                | 0              | 3.827780                | -2.422585 | -2.334649 |
| 40               | 6                | 0              | 4.214412                | -1.706868 | -0.061119 |
| 41               | 6                | 0              | 4.440617                | -2.592013 | -1.112747 |
| 42               | 8                | 0              | 5.348161                | -3.547196 | -0.728076 |
| 43               | 8                | 0              | 4.988194                | -2.075092 | 1.015774  |
| 44               | 6                | 0              | 5.499859                | -3.368294 | 0.684969  |
| 45               | 1                | 0              | -0.940871               | 1.643770  | 1.972517  |
| 46               | 1                | 0              | -2.430610               | 2.525521  | 3.728002  |
| 47               | 1                | 0              | -0.147064               | -1.833262 | 4.388669  |
| 48               | 1                | 0              | -2.814835               | 1.219225  | 5.817330  |
| 49               | 1                | 0              | -1.683379               | -0.974893 | 6.121061  |
| 50               | 1                | 0              | -0.144786               | -3.309906 | 0.785902  |
| 51               | 1                | 0              | 2.739001                | -1.819507 | 3.626897  |
| 52               | 1                | 0              | 3.361550                | -4.141959 | 4.211791  |
| 53               | 1                | 0              | 0.478738                | -5.625512 | 1.378564  |
| 54               | 1                | 0              | 2.233963                | -6.055724 | 3.089707  |

|     |    |   |           |           |           |
|-----|----|---|-----------|-----------|-----------|
| 55  | 1  | 0 | 1.529374  | 1.182305  | 3.856494  |
| 56  | 1  | 0 | 3.517867  | 2.622026  | 4.240176  |
| 57  | 1  | 0 | 7.248726  | 1.509653  | 1.668775  |
| 58  | 1  | 0 | 6.713074  | 2.912424  | 0.664859  |
| 59  | 1  | 0 | 2.815854  | 2.063613  | -3.857638 |
| 60  | 1  | 0 | 2.368813  | 2.202765  | -6.277460 |
| 61  | 1  | 0 | -0.801314 | -0.213813 | -3.315988 |
| 62  | 1  | 0 | 0.333006  | 1.143946  | -7.238129 |
| 63  | 1  | 0 | -1.251683 | -0.062316 | -5.743952 |
| 64  | 1  | 0 | 0.019330  | 3.098428  | -0.549692 |
| 65  | 1  | 0 | 4.051394  | 2.093323  | -1.678717 |
| 66  | 1  | 0 | 4.750348  | 4.419932  | -1.219786 |
| 67  | 1  | 0 | 0.702964  | 5.422589  | -0.122836 |
| 68  | 1  | 0 | 3.091650  | 6.097048  | -0.438876 |
| 69  | 1  | 0 | 2.441418  | -1.186286 | -3.396638 |
| 70  | 1  | 0 | 4.007471  | -3.098588 | -3.163400 |
| 71  | 1  | 0 | 6.560245  | -3.416959 | 0.944156  |
| 72  | 1  | 0 | 4.920205  | -4.136048 | 1.216722  |
| 73  | 8  | 0 | -2.715633 | -1.616789 | -2.266144 |
| 74  | 8  | 0 | -1.594927 | -3.290633 | -1.201092 |
| 75  | 6  | 0 | -3.402775 | -2.841880 | -2.642572 |
| 76  | 6  | 0 | -2.367915 | -3.952623 | -2.233813 |
| 77  | 6  | 0 | -4.707289 | -2.899413 | -1.834747 |
| 78  | 6  | 0 | -3.729229 | -2.772744 | -4.135802 |
| 79  | 6  | 0 | -2.975443 | -5.227612 | -1.646406 |
| 80  | 6  | 0 | -1.384909 | -4.317990 | -3.357640 |
| 81  | 5  | 0 | -1.700882 | -1.902091 | -1.339618 |
| 82  | 29 | 0 | -0.383365 | -0.633116 | -0.453814 |
| 83  | 6  | 0 | -2.761250 | 3.393548  | -1.531311 |
| 84  | 6  | 0 | -3.401841 | 2.213265  | -1.339306 |
| 85  | 6  | 0 | -2.770341 | 4.409926  | -0.455918 |
| 86  | 6  | 0 | -4.155718 | 1.910442  | -0.131425 |
| 87  | 6  | 0 | -2.029090 | 3.740683  | -2.797887 |
| 88  | 8  | 0 | -2.118681 | 5.458853  | -0.552779 |
| 89  | 6  | 0 | -3.600216 | 4.141016  | 0.744257  |
| 90  | 6  | 0 | -4.780788 | 0.693371  | -0.047609 |
| 91  | 6  | 0 | -4.247268 | 2.955826  | 0.874196  |
| 92  | 6  | 0 | -3.688303 | 5.245174  | 1.760509  |
| 93  | 6  | 0 | -5.571326 | 0.121641  | 1.043379  |
| 94  | 6  | 0 | -5.253356 | 0.289312  | 2.406120  |
| 95  | 6  | 0 | -6.684866 | -0.680260 | 0.716221  |
| 96  | 6  | 0 | -6.042232 | -0.291163 | 3.397531  |
| 97  | 6  | 0 | -7.480111 | -1.246015 | 1.708859  |
| 98  | 6  | 0 | -7.164170 | -1.049772 | 3.056115  |
| 99  | 1  | 0 | -4.508005 | -2.898484 | -0.759104 |
| 100 | 1  | 0 | -5.303448 | -3.785644 | -2.080576 |
| 101 | 1  | 0 | -5.308775 | -2.014528 | -2.069129 |
| 102 | 1  | 0 | -2.832823 | -2.607426 | -4.738578 |
| 103 | 1  | 0 | -4.417862 | -1.941487 | -4.322975 |
| 104 | 1  | 0 | -4.213604 | -3.695033 | -4.479339 |
| 105 | 1  | 0 | -2.173170 | -5.916451 | -1.360342 |
| 106 | 1  | 0 | -3.612441 | -5.738807 | -2.378644 |
| 107 | 1  | 0 | -3.569791 | -5.017262 | -0.753920 |
| 108 | 1  | 0 | -0.583635 | -4.934921 | -2.938093 |
| 109 | 1  | 0 | -0.926066 | -3.421615 | -3.786038 |
| 110 | 1  | 0 | -1.869405 | -4.883446 | -4.162154 |
| 111 | 1  | 0 | -3.357773 | 1.436596  | -2.100374 |
| 112 | 1  | 0 | -2.012819 | 2.895474  | -3.491972 |
| 113 | 1  | 0 | -0.998739 | 4.046203  | -2.590711 |
| 114 | 1  | 0 | -2.506851 | 4.595254  | -3.294024 |
| 115 | 1  | 0 | -4.695807 | 0.057526  | -0.927299 |

|     |   |   |           |           |           |
|-----|---|---|-----------|-----------|-----------|
| 116 | 1 | 0 | -4.882907 | 2.784778  | 1.737947  |
| 117 | 1 | 0 | -2.692667 | 5.508883  | 2.136340  |
| 118 | 1 | 0 | -4.324197 | 4.960979  | 2.605203  |
| 119 | 1 | 0 | -4.090736 | 6.159834  | 1.308993  |
| 120 | 1 | 0 | -4.354539 | 0.827687  | 2.684728  |
| 121 | 1 | 0 | -6.931310 | -0.840280 | -0.330146 |
| 122 | 1 | 0 | -5.767784 | -0.162944 | 4.441199  |
| 123 | 1 | 0 | -8.342045 | -1.847295 | 1.432306  |
| 124 | 1 | 0 | -7.776945 | -1.500126 | 3.832309  |

```

-----
Zero-point correction=                0.991469
(Hartree/Particle)
Thermal correction to Energy=         1.057798
Thermal correction to Enthalpy=       1.058742
Thermal correction to Gibbs Free Energy= 0.879965
Sum of electronic and zero-point Energies= -3710.100368
Sum of electronic and thermal Energies= -3710.034039
Sum of electronic and thermal Enthalpies= -3710.033095
Sum of electronic and thermal Free Energies= -3710.211873

```

### I<sub>R</sub> (Scheme 4, main manuscript)

Standard orientation:

| Center<br>Number | Atomic<br>Number | Atomic<br>Type | Coordinates (Angstroms) |           |           |
|------------------|------------------|----------------|-------------------------|-----------|-----------|
|                  |                  |                | X                       | Y         | Z         |
| 1                | 8                | 0              | -2.259557               | -2.906232 | -1.321749 |
| 2                | 8                | 0              | -1.422793               | -3.604383 | 0.677878  |
| 3                | 6                | 0              | -2.714825               | -4.276656 | -1.165435 |
| 4                | 6                | 0              | -2.504084               | -4.521983 | 0.370522  |
| 5                | 6                | 0              | -4.161989               | -4.374016 | -1.649010 |
| 6                | 6                | 0              | -1.812524               | -5.151066 | -2.051072 |
| 7                | 6                | 0              | -3.707272               | -4.096778 | 1.226861  |
| 8                | 6                | 0              | -2.068314               | -5.936727 | 0.753995  |
| 9                | 5                | 0              | -1.378788               | -2.585677 | -0.280743 |
| 10               | 29               | 0              | -0.115573               | -0.994932 | -0.131439 |
| 11               | 15               | 0              | 0.972018                | 0.455336  | -1.796455 |
| 12               | 6                | 0              | 0.295237                | 0.167613  | -3.498206 |
| 13               | 6                | 0              | -0.679595               | -0.833140 | -3.649763 |
| 14               | 6                | 0              | -1.235203               | -1.092234 | -4.905315 |
| 15               | 6                | 0              | 0.684803                | 0.911537  | -4.624474 |
| 16               | 6                | 0              | 1.391046                | 2.252497  | -1.823951 |
| 17               | 6                | 0              | -0.837260               | -0.352176 | -6.019118 |
| 18               | 6                | 0              | 0.122453                | 0.652973  | -5.874674 |
| 19               | 6                | 0              | 0.479398                | 3.139453  | -1.231238 |
| 20               | 6                | 0              | 2.538749                | 2.775437  | -2.441782 |
| 21               | 6                | 0              | 2.752957                | 4.154801  | -2.477651 |
| 22               | 6                | 0              | 2.598427                | -0.434941 | -1.780461 |
| 23               | 6                | 0              | 0.690573                | 4.519953  | -1.267126 |
| 24               | 6                | 0              | 1.829746                | 5.027606  | -1.894800 |
| 25               | 6                | 0              | 2.828722                | -1.437209 | -2.733557 |
| 26               | 6                | 0              | 3.518442                | -0.261932 | -0.694556 |
| 27               | 6                | 0              | 3.937758                | -2.299768 | -2.685292 |
| 28               | 6                | 0              | 4.602369                | -1.126204 | -0.681983 |
| 29               | 6                | 0              | 4.808311                | -2.123842 | -1.632642 |
| 30               | 8                | 0              | 5.970812                | -2.797982 | -1.353843 |
| 31               | 8                | 0              | 5.642683                | -1.136755 | 0.218967  |
| 32               | 6                | 0              | 6.370791                | -2.335267 | -0.058672 |
| 33               | 15               | 0              | 1.397923                | -0.520961 | 1.716063  |

|    |   |   |           |           |           |
|----|---|---|-----------|-----------|-----------|
| 34 | 6 | 0 | 0.426477  | -0.004071 | 3.197711  |
| 35 | 6 | 0 | 0.788569  | -0.317780 | 4.516547  |
| 36 | 6 | 0 | -0.007216 | 0.098065  | 5.586031  |
| 37 | 6 | 0 | -0.754559 | 0.721676  | 2.973228  |
| 38 | 6 | 0 | 2.346474  | -1.990737 | 2.302323  |
| 39 | 6 | 0 | -1.171389 | 0.833070  | 5.351896  |
| 40 | 6 | 0 | -1.544010 | 1.145300  | 4.042579  |
| 41 | 6 | 0 | 1.731983  | -3.249863 | 2.181856  |
| 42 | 6 | 0 | 3.633618  | -1.905040 | 2.855266  |
| 43 | 6 | 0 | 4.293311  | -3.057768 | 3.289161  |
| 44 | 6 | 0 | 2.667880  | 0.807670  | 1.526886  |
| 45 | 6 | 0 | 2.394846  | -4.396573 | 2.623028  |
| 46 | 6 | 0 | 3.674564  | -4.305038 | 3.175476  |
| 47 | 6 | 0 | 2.789727  | 1.836783  | 2.469497  |
| 48 | 6 | 0 | 3.482981  | 0.810313  | 0.352252  |
| 49 | 6 | 0 | 3.705018  | 2.893924  | 2.324771  |
| 50 | 6 | 0 | 4.385880  | 1.856340  | 0.250352  |
| 51 | 6 | 0 | 4.494636  | 2.872482  | 1.196204  |
| 52 | 8 | 0 | 5.470322  | 3.759027  | 0.820718  |
| 53 | 8 | 0 | 5.295362  | 2.071477  | -0.757848 |
| 54 | 6 | 0 | 5.942566  | 3.310339  | -0.454536 |
| 55 | 1 | 0 | -4.810243 | -3.666274 | -1.127243 |
| 56 | 1 | 0 | -4.560129 | -5.385435 | -1.501060 |
| 57 | 1 | 0 | -4.207255 | -4.149155 | -2.720688 |
| 58 | 1 | 0 | -0.769358 | -5.095357 | -1.724916 |
| 59 | 1 | 0 | -1.862264 | -4.783238 | -3.081330 |
| 60 | 1 | 0 | -2.125843 | -6.201521 | -2.046460 |
| 61 | 1 | 0 | -3.406845 | -4.092964 | 2.279646  |
| 62 | 1 | 0 | -4.555654 | -4.781799 | 1.113118  |
| 63 | 1 | 0 | -4.036642 | -3.085915 | 0.967906  |
| 64 | 1 | 0 | -1.913402 | -5.991774 | 1.837077  |
| 65 | 1 | 0 | -1.131151 | -6.215152 | 0.265947  |
| 66 | 1 | 0 | -2.834280 | -6.674739 | 0.485655  |
| 67 | 1 | 0 | -1.008869 | -1.407379 | -2.787727 |
| 68 | 1 | 0 | -1.987420 | -1.870545 | -5.004140 |
| 69 | 1 | 0 | 1.418697  | 1.704875  | -4.527112 |
| 70 | 1 | 0 | -1.275650 | -0.550714 | -6.993976 |
| 71 | 1 | 0 | 0.432210  | 1.239985  | -6.735688 |
| 72 | 1 | 0 | -0.403948 | 2.748845  | -0.732167 |
| 73 | 1 | 0 | 3.271740  | 2.104990  | -2.880856 |
| 74 | 1 | 0 | 3.639397  | 4.548892  | -2.969636 |
| 75 | 1 | 0 | -0.039411 | 5.179507  | -0.806954 |
| 76 | 1 | 0 | 2.000594  | 6.100561  | -1.926640 |
| 77 | 1 | 0 | 2.120124  | -1.565074 | -3.543598 |
| 78 | 1 | 0 | 4.096555  | -3.064885 | -3.437274 |
| 79 | 1 | 0 | 7.441480  | -2.116294 | -0.067278 |
| 80 | 1 | 0 | 6.122426  | -3.095219 | 0.695411  |
| 81 | 1 | 0 | 1.689953  | -0.892425 | 4.707940  |
| 82 | 1 | 0 | 0.282576  | -0.154531 | 6.602790  |
| 83 | 1 | 0 | -1.062230 | 0.944540  | 1.954482  |
| 84 | 1 | 0 | -1.789327 | 1.154304  | 6.186430  |
| 85 | 1 | 0 | -2.452662 | 1.708401  | 3.847661  |
| 86 | 1 | 0 | 0.740443  | -3.334021 | 1.742858  |
| 87 | 1 | 0 | 4.124450  | -0.940410 | 2.939058  |
| 88 | 1 | 0 | 5.287543  | -2.978391 | 3.722491  |
| 89 | 1 | 0 | 1.910159  | -5.364670 | 2.527164  |
| 90 | 1 | 0 | 4.188301  | -5.201116 | 3.514623  |
| 91 | 1 | 0 | 2.158891  | 1.822804  | 3.350509  |
| 92 | 1 | 0 | 3.787630  | 3.682937  | 3.064161  |
| 93 | 1 | 0 | 7.025754  | 3.153688  | -0.407014 |
| 94 | 1 | 0 | 5.686789  | 4.054160  | -1.219302 |

|     |   |   |           |           |           |
|-----|---|---|-----------|-----------|-----------|
| 95  | 6 | 0 | -3.588660 | 4.277748  | 1.862952  |
| 96  | 6 | 0 | -4.536087 | 3.336966  | 2.096093  |
| 97  | 6 | 0 | -3.113035 | 4.507405  | 0.479095  |
| 98  | 6 | 0 | -5.095321 | 2.501894  | 1.043997  |
| 99  | 6 | 0 | -2.971022 | 5.122132  | 2.941437  |
| 100 | 8 | 0 | -2.229054 | 5.341392  | 0.243177  |
| 101 | 6 | 0 | -3.750117 | 3.732532  | -0.611731 |
| 102 | 6 | 0 | -6.005164 | 1.535186  | 1.387571  |
| 103 | 6 | 0 | -4.674675 | 2.784361  | -0.318153 |
| 104 | 6 | 0 | -3.341723 | 4.072170  | -2.017580 |
| 105 | 6 | 0 | -6.625762 | 0.501636  | 0.562815  |
| 106 | 6 | 0 | -7.939793 | 0.092725  | 0.874252  |
| 107 | 6 | 0 | -5.961703 | -0.146355 | -0.499933 |
| 108 | 6 | 0 | -8.587003 | -0.880621 | 0.119285  |
| 109 | 6 | 0 | -6.609515 | -1.127297 | -1.248443 |
| 110 | 6 | 0 | -7.925409 | -1.490656 | -0.950404 |
| 111 | 1 | 0 | -4.888236 | 3.161852  | 3.112057  |
| 112 | 1 | 0 | -1.888612 | 4.955796  | 2.993215  |
| 113 | 1 | 0 | -3.408271 | 4.901511  | 3.920301  |
| 114 | 1 | 0 | -3.105609 | 6.188228  | 2.725073  |
| 115 | 1 | 0 | -6.335449 | 1.539870  | 2.426866  |
| 116 | 1 | 0 | -5.157234 | 2.243560  | -1.125985 |
| 117 | 1 | 0 | -3.904276 | 3.481783  | -2.747050 |
| 118 | 1 | 0 | -2.272042 | 3.891130  | -2.172312 |
| 119 | 1 | 0 | -3.503972 | 5.137161  | -2.221397 |
| 120 | 1 | 0 | -8.456481 | 0.563231  | 1.707377  |
| 121 | 1 | 0 | -4.922267 | 0.083537  | -0.708146 |
| 122 | 1 | 0 | -9.604726 | -1.168949 | 0.367839  |
| 123 | 1 | 0 | -6.076481 | -1.618905 | -2.056993 |
| 124 | 1 | 0 | -8.425746 | -2.256943 | -1.536048 |

-----

Zero-point correction= 0.991191  
(Hartree/Particle)  
Thermal correction to Energy= 1.057629  
Thermal correction to Enthalpy= 1.058574  
Thermal correction to Gibbs Free Energy= 0.877962  
Sum of electronic and zero-point Energies= -3710.101333  
Sum of electronic and thermal Energies= -3710.034894  
Sum of electronic and thermal Enthalpies= -3710.033950  
Sum of electronic and thermal Free Energies= -3710.214561

**TS<sub>5</sub>** (Scheme 4, main manuscript)

Standard orientation:

-----

| Center<br>Number | Atomic<br>Number | Atomic<br>Type | Coordinates (Angstroms) |           |           |
|------------------|------------------|----------------|-------------------------|-----------|-----------|
|                  |                  |                | X                       | Y         | Z         |
| 1                | 15               | 0              | -0.391191               | -0.945089 | -1.615502 |
| 2                | 6                | 0              | 0.180526                | -0.722046 | -3.365798 |
| 3                | 6                | 0              | 0.420259                | 0.583180  | -3.830068 |
| 4                | 6                | 0              | 0.828342                | 0.804938  | -5.145885 |
| 5                | 6                | 0              | 0.388030                | -1.798255 | -4.243121 |
| 6                | 6                | 0              | -0.510015               | -2.790964 | -1.501341 |
| 7                | 6                | 0              | 1.031689                | -0.272992 | -6.010448 |
| 8                | 6                | 0              | 0.817787                | -1.573373 | -5.553260 |
| 9                | 6                | 0              | 0.630361                | -3.515509 | -1.121411 |
| 10               | 6                | 0              | -1.668871               | -3.492462 | -1.870808 |
| 11               | 6                | 0              | -1.686333               | -4.888837 | -1.858573 |
| 12               | 6                | 0              | -2.176361               | -0.435113 | -1.695605 |

-----



|    |    |   |           |           |           |
|----|----|---|-----------|-----------|-----------|
| 13 | 6  | 0 | 0.612229  | -4.912543 | -1.123798 |
| 14 | 6  | 0 | -0.544677 | -5.603427 | -1.489062 |
| 15 | 6  | 0 | -2.728498 | 0.013582  | -2.904063 |
| 16 | 6  | 0 | -2.997998 | -0.517729 | -0.529753 |
| 17 | 6  | 0 | -4.074399 | 0.393187  | -3.037835 |
| 18 | 6  | 0 | -4.325918 | -0.157557 | -0.703178 |
| 19 | 6  | 0 | -4.855657 | 0.291733  | -1.908539 |
| 20 | 8  | 0 | -6.179043 | 0.609916  | -1.747702 |
| 21 | 8  | 0 | -5.305892 | -0.126337 | 0.262735  |
| 22 | 6  | 0 | -6.521674 | 0.164705  | -0.430753 |
| 23 | 15 | 0 | -0.850207 | 1.179182  | 1.389504  |
| 24 | 6  | 0 | -0.543510 | 2.012464  | 3.019018  |
| 25 | 6  | 0 | -1.435760 | 2.948120  | 3.566779  |
| 26 | 6  | 0 | -1.160287 | 3.561441  | 4.789379  |
| 27 | 6  | 0 | 0.636667  | 1.715140  | 3.719973  |
| 28 | 6  | 0 | -1.956945 | 2.369944  | 0.529890  |
| 29 | 6  | 0 | 0.009936  | 3.252010  | 5.484855  |
| 30 | 6  | 0 | 0.905158  | 2.327026  | 4.946880  |
| 31 | 6  | 0 | -1.351745 | 3.212612  | -0.413030 |
| 32 | 6  | 0 | -3.317699 | 2.543303  | 0.831170  |
| 33 | 6  | 0 | -4.047621 | 3.555219  | 0.205305  |
| 34 | 6  | 0 | -1.858809 | -0.314432 | 1.816867  |
| 35 | 6  | 0 | -2.076520 | 4.241117  | -1.019488 |
| 36 | 6  | 0 | -3.426746 | 4.411244  | -0.710210 |
| 37 | 6  | 0 | -1.709158 | -0.862798 | 3.099251  |
| 38 | 6  | 0 | -2.608257 | -1.021945 | 0.824745  |
| 39 | 6  | 0 | -2.263552 | -2.098915 | 3.472551  |
| 40 | 6  | 0 | -3.145288 | -2.236359 | 1.229868  |
| 41 | 6  | 0 | -2.971838 | -2.773691 | 2.502023  |
| 42 | 8  | 0 | -3.637776 | -3.969263 | 2.598816  |
| 43 | 8  | 0 | -3.948780 | -3.073472 | 0.490620  |
| 44 | 6  | 0 | -4.072602 | -4.267898 | 1.267395  |
| 45 | 1  | 0 | 0.291509  | 1.430529  | -3.163484 |
| 46 | 1  | 0 | 0.997339  | 1.821392  | -5.487321 |
| 47 | 1  | 0 | 0.212360  | -2.815182 | -3.911020 |
| 48 | 1  | 0 | 1.359187  | -0.098790 | -7.031868 |
| 49 | 1  | 0 | 0.976522  | -2.419391 | -6.216961 |
| 50 | 1  | 0 | 1.528192  | -2.994114 | -0.807626 |
| 51 | 1  | 0 | -2.560013 | -2.951731 | -2.169284 |
| 52 | 1  | 0 | -2.590464 | -5.416426 | -2.152202 |
| 53 | 1  | 0 | 1.506549  | -5.460174 | -0.837271 |
| 54 | 1  | 0 | -0.556254 | -6.690326 | -1.488677 |
| 55 | 1  | 0 | -2.103789 | 0.064383  | -3.786065 |
| 56 | 1  | 0 | -4.474750 | 0.743311  | -3.982720 |
| 57 | 1  | 0 | -7.132603 | -0.746450 | -0.500038 |
| 58 | 1  | 0 | -7.059660 | 0.958822  | 0.093367  |
| 59 | 1  | 0 | -2.341635 | 3.216183  | 3.035393  |
| 60 | 1  | 0 | -1.860358 | 4.287725  | 5.193856  |
| 61 | 1  | 0 | 1.346772  | 1.002734  | 3.315142  |
| 62 | 1  | 0 | 0.225156  | 3.734775  | 6.434525  |
| 63 | 1  | 0 | 1.823816  | 2.084889  | 5.475218  |
| 64 | 1  | 0 | -0.303883 | 3.080734  | -0.657622 |
| 65 | 1  | 0 | -3.809930 | 1.882849  | 1.539858  |
| 66 | 1  | 0 | -5.101653 | 3.682625  | 0.439970  |
| 67 | 1  | 0 | -1.567096 | 4.908265  | -1.709162 |
| 68 | 1  | 0 | -3.997110 | 5.208624  | -1.179394 |
| 69 | 1  | 0 | -1.141293 | -0.315896 | 3.842871  |
| 70 | 1  | 0 | -2.146238 | -2.496326 | 4.474836  |
| 71 | 1  | 0 | -5.119836 | -4.580037 | 1.289268  |
| 72 | 1  | 0 | -3.430992 | -5.050249 | 0.838436  |
| 73 | 8  | 0 | 2.546482  | -0.632002 | 2.626858  |

|     |    |   |          |           |           |
|-----|----|---|----------|-----------|-----------|
| 74  | 8  | 0 | 2.691446 | -2.150842 | 0.936904  |
| 75  | 6  | 0 | 3.270552 | -1.765657 | 3.194761  |
| 76  | 6  | 0 | 2.947065 | -2.907703 | 2.161765  |
| 77  | 6  | 0 | 4.753300 | -1.372795 | 3.233177  |
| 78  | 6  | 0 | 2.756778 | -2.004410 | 4.613722  |
| 79  | 6  | 0 | 4.092819 | -3.879828 | 1.885093  |
| 80  | 6  | 0 | 1.664041 | -3.679581 | 2.496749  |
| 81  | 5  | 0 | 2.340199 | -0.862296 | 1.276036  |
| 82  | 29 | 0 | 1.009342 | 0.324034  | 0.111345  |
| 83  | 6  | 0 | 1.862758 | 4.310474  | 0.173077  |
| 84  | 6  | 0 | 2.242399 | 3.052133  | 0.563692  |
| 85  | 6  | 0 | 1.736881 | 4.636028  | -1.249547 |
| 86  | 6  | 0 | 2.552655 | 2.001291  | -0.366012 |
| 87  | 6  | 0 | 1.524977 | 5.400171  | 1.153076  |
| 88  | 8  | 0 | 1.311261 | 5.749604  | -1.636975 |
| 89  | 6  | 0 | 2.141447 | 3.595662  | -2.193801 |
| 90  | 6  | 0 | 3.154825 | 0.755173  | 0.160175  |
| 91  | 6  | 0 | 2.510530 | 2.344807  | -1.754779 |
| 92  | 6  | 0 | 2.143134 | 3.978327  | -3.649895 |
| 93  | 6  | 0 | 4.124437 | -0.000871 | -0.705922 |
| 94  | 6  | 0 | 3.738294 | -0.751258 | -1.825118 |
| 95  | 6  | 0 | 5.492741 | 0.070508  | -0.397528 |
| 96  | 6  | 0 | 4.685963 | -1.397362 | -2.618364 |
| 97  | 6  | 0 | 6.443743 | -0.581192 | -1.184954 |
| 98  | 6  | 0 | 6.043769 | -1.318136 | -2.300796 |
| 99  | 1  | 0 | 5.145498 | -1.188172 | 2.228736  |
| 100 | 1  | 0 | 5.363071 | -2.151150 | 3.704793  |
| 101 | 1  | 0 | 4.862886 | -0.452807 | 3.816757  |
| 102 | 1  | 0 | 1.673247 | -2.139662 | 4.634627  |
| 103 | 1  | 0 | 3.003010 | -1.143363 | 5.243929  |
| 104 | 1  | 0 | 3.228282 | -2.889868 | 5.055810  |
| 105 | 1  | 0 | 3.777771 | -4.614353 | 1.136667  |
| 106 | 1  | 0 | 4.372561 | -4.425213 | 2.794235  |
| 107 | 1  | 0 | 4.974629 | -3.364879 | 1.497953  |
| 108 | 1  | 0 | 1.399661 | -4.326141 | 1.655563  |
| 109 | 1  | 0 | 0.823029 | -3.001768 | 2.671740  |
| 110 | 1  | 0 | 1.797918 | -4.308396 | 3.383771  |
| 111 | 1  | 0 | 2.323908 | 2.831506  | 1.628004  |
| 112 | 1  | 0 | 1.655172 | 5.067534  | 2.188829  |
| 113 | 1  | 0 | 0.488357 | 5.734554  | 1.018925  |
| 114 | 1  | 0 | 2.148820 | 6.286248  | 0.982244  |
| 115 | 1  | 0 | 3.588008 | 0.958675  | 1.138180  |
| 116 | 1  | 0 | 2.830255 | 1.605560  | -2.484202 |
| 117 | 1  | 0 | 1.127644 | 4.193957  | -4.011181 |
| 118 | 1  | 0 | 2.580277 | 3.190789  | -4.273473 |
| 119 | 1  | 0 | 2.710128 | 4.904299  | -3.802441 |
| 120 | 1  | 0 | 2.685356 | -0.834344 | -2.073248 |
| 121 | 1  | 0 | 5.815972 | 0.657624  | 0.459226  |
| 122 | 1  | 0 | 4.358995 | -1.967829 | -3.483898 |
| 123 | 1  | 0 | 7.497264 | -0.507190 | -0.927383 |
| 124 | 1  | 0 | 6.781765 | -1.825494 | -2.916412 |

-----  
Zero-point correction=  
(Hartree/Particle)

0.992079

Thermal correction to Energy=

1.056695

Thermal correction to Enthalpy=

1.057639

Thermal correction to Gibbs Free Energy=

0.888256

Sum of electronic and zero-point Energies=

-3710.079360

Sum of electronic and thermal Energies=

-3710.014743

Sum of electronic and thermal Enthalpies=

-3710.013799

Sum of electronic and thermal Free Energies=

-3710.183182

**TS<sub>R</sub>** (Scheme 4, main manuscript)

Standard orientation:

| Center<br>Number | Atomic<br>Number | Atomic<br>Type | Coordinates (Angstroms) |           |           |
|------------------|------------------|----------------|-------------------------|-----------|-----------|
|                  |                  |                | X                       | Y         | Z         |
| 1                | 6                | 0              | -0.604226               | 2.782959  | 3.288715  |
| 2                | 6                | 0              | -1.303630               | 1.743882  | 2.720450  |
| 3                | 6                | 0              | -0.578586               | 4.094763  | 2.648303  |
| 4                | 6                | 0              | -2.027758               | 1.871848  | 1.486865  |
| 5                | 6                | 0              | 0.157629                | 2.640914  | 4.578688  |
| 6                | 8                | 0              | 0.103806                | 5.042891  | 3.109812  |
| 7                | 6                | 0              | -1.387038               | 4.246515  | 1.437630  |
| 8                | 6                | 0              | -2.931430               | 0.771498  | 1.073149  |
| 9                | 6                | 0              | -2.043607               | 3.172721  | 0.888459  |
| 10               | 6                | 0              | -1.434241               | 5.618660  | 0.822649  |
| 11               | 6                | 0              | -4.176467               | 1.127225  | 0.306767  |
| 12               | 6                | 0              | -5.416791               | 1.041985  | 0.960572  |
| 13               | 6                | 0              | -4.155906               | 1.572281  | -1.023709 |
| 14               | 6                | 0              | -6.597127               | 1.411787  | 0.312782  |
| 15               | 6                | 0              | -5.332781               | 1.949969  | -1.669745 |
| 16               | 6                | 0              | -6.558994               | 1.872234  | -1.005213 |
| 17               | 1                | 0              | -1.342545               | 0.786227  | 3.240630  |
| 18               | 1                | 0              | -0.192014               | 3.367816  | 5.322395  |
| 19               | 1                | 0              | 1.223167                | 2.860309  | 4.430642  |
| 20               | 1                | 0              | 0.058611                | 1.633204  | 4.999603  |
| 21               | 1                | 0              | -3.173476               | 0.155415  | 1.935901  |
| 22               | 1                | 0              | -2.630778               | 3.329130  | -0.012284 |
| 23               | 1                | 0              | -2.109160               | 5.650934  | -0.040203 |
| 24               | 1                | 0              | -0.436160               | 5.940061  | 0.497920  |
| 25               | 1                | 0              | -1.763028               | 6.362564  | 1.558427  |
| 26               | 1                | 0              | -5.452249               | 0.695129  | 1.990488  |
| 27               | 1                | 0              | -3.212851               | 1.604432  | -1.558934 |
| 28               | 1                | 0              | -7.544886               | 1.344285  | 0.840864  |
| 29               | 1                | 0              | -5.289480               | 2.295939  | -2.699255 |
| 30               | 1                | 0              | -7.476133               | 2.163180  | -1.510478 |
| 31               | 29               | 0              | -0.975252               | 0.164843  | 0.322835  |
| 32               | 15               | 0              | 0.493890                | 1.003078  | -1.478428 |
| 33               | 6                | 0              | -0.453771               | 1.489941  | -2.992294 |
| 34               | 6                | 0              | -1.489346               | 0.637616  | -3.417763 |
| 35               | 6                | 0              | -2.258385               | 0.959647  | -4.537353 |
| 36               | 6                | 0              | -0.237490               | 2.687362  | -3.690931 |
| 37               | 6                | 0              | 1.593736                | 2.435870  | -1.120974 |
| 38               | 6                | 0              | -2.025866               | 2.148028  | -5.233501 |
| 39               | 6                | 0              | -1.020759               | 3.013402  | -4.800653 |
| 40               | 6                | 0              | 1.415968                | 3.113414  | 0.090733  |
| 41               | 6                | 0              | 2.594968                | 2.866863  | -2.009508 |
| 42               | 6                | 0              | 3.371592                | 3.983211  | -1.696531 |
| 43               | 6                | 0              | 1.698168                | -0.282782 | -2.069925 |
| 44               | 6                | 0              | 2.193862                | 4.231401  | 0.406429  |
| 45               | 6                | 0              | 3.166351                | 4.669920  | -0.493272 |
| 46               | 6                | 0              | 1.574429                | -0.840271 | -3.347937 |
| 47               | 6                | 0              | 2.726064                | -0.744667 | -1.184987 |
| 48               | 6                | 0              | 2.429101                | -1.851202 | -3.823819 |
| 49               | 6                | 0              | 3.555209                | -1.732524 | -1.690535 |
| 50               | 6                | 0              | 3.413913                | -2.281290 | -2.962381 |
| 51               | 8                | 0              | 4.380007                | -3.230890 | -3.170824 |
| 52               | 8                | 0              | 4.620238                | -2.320167 | -1.054364 |
| 53               | 6                | 0              | 5.086277                | -3.350330 | -1.929398 |
| 54               | 15               | 0              | 0.690657                | -1.271734 | 1.357632  |
| 55               | 6                | 0              | 0.431759                | -1.872620 | 3.087522  |

|     |   |   |           |           |           |
|-----|---|---|-----------|-----------|-----------|
| 56  | 6 | 0 | 1.464950  | -2.213418 | 3.977255  |
| 57  | 6 | 0 | 1.172299  | -2.729869 | 5.239889  |
| 58  | 6 | 0 | -0.898940 | -2.071751 | 3.490574  |
| 59  | 6 | 0 | 1.080078  | -2.856889 | 0.472770  |
| 60  | 6 | 0 | -0.154557 | -2.921771 | 5.631601  |
| 61  | 6 | 0 | -1.187736 | -2.595119 | 4.753012  |
| 62  | 6 | 0 | 0.361121  | -3.182752 | -0.685575 |
| 63  | 6 | 0 | 2.057622  | -3.750575 | 0.936926  |
| 64  | 6 | 0 | 2.307970  | -4.943393 | 0.258071  |
| 65  | 6 | 0 | 2.278142  | -0.333203 | 1.362739  |
| 66  | 6 | 0 | 0.618554  | -4.372877 | -1.370732 |
| 67  | 6 | 0 | 1.589248  | -5.257539 | -0.898894 |
| 68  | 6 | 0 | 2.653399  | 0.357252  | 2.524933  |
| 69  | 6 | 0 | 3.038239  | -0.172027 | 0.161734  |
| 70  | 6 | 0 | 3.803945  | 1.159651  | 2.595919  |
| 71  | 6 | 0 | 4.185557  | 0.599349  | 0.277821  |
| 72  | 6 | 0 | 4.564261  | 1.246895  | 1.450448  |
| 73  | 8 | 0 | 5.732550  | 1.932230  | 1.248292  |
| 74  | 8 | 0 | 5.102110  | 0.867165  | -0.708018 |
| 75  | 6 | 0 | 6.004902  | 1.829930  | -0.154313 |
| 76  | 8 | 0 | -2.933306 | -1.474354 | -1.245278 |
| 77  | 8 | 0 | -3.297555 | -1.934966 | 0.958022  |
| 78  | 6 | 0 | -3.925037 | -2.555482 | -1.254813 |
| 79  | 6 | 0 | -3.932281 | -3.042214 | 0.255481  |
| 80  | 6 | 0 | -5.247728 | -1.937822 | -1.724361 |
| 81  | 6 | 0 | -3.465465 | -3.604378 | -2.268041 |
| 82  | 6 | 0 | -5.325878 | -3.232340 | 0.859285  |
| 83  | 6 | 0 | -3.082587 | -4.290178 | 0.525095  |
| 84  | 5 | 0 | -2.694953 | -1.083636 | 0.056212  |
| 85  | 1 | 0 | -1.715461 | -0.266283 | -2.859505 |
| 86  | 1 | 0 | -3.051033 | 0.286674  | -4.853951 |
| 87  | 1 | 0 | 0.534081  | 3.375532  | -3.366036 |
| 88  | 1 | 0 | -2.631650 | 2.402878  | -6.099105 |
| 89  | 1 | 0 | -0.842251 | 3.948527  | -5.324878 |
| 90  | 1 | 0 | 0.667621  | 2.765808  | 0.790905  |
| 91  | 1 | 0 | 2.769278  | 2.331488  | -2.938972 |
| 92  | 1 | 0 | 4.132948  | 4.321983  | -2.395392 |
| 93  | 1 | 0 | 2.011828  | 4.750374  | 1.343959  |
| 94  | 1 | 0 | 3.767834  | 5.544802  | -0.259627 |
| 95  | 1 | 0 | 0.796595  | -0.479597 | -4.010510 |
| 96  | 1 | 0 | 2.321741  | -2.264395 | -4.820791 |
| 97  | 1 | 0 | 6.158425  | -3.220201 | -2.107607 |
| 98  | 1 | 0 | 4.875264  | -4.330960 | -1.483912 |
| 99  | 1 | 0 | 2.501431  | -2.059348 | 3.695063  |
| 100 | 1 | 0 | 1.983440  | -2.980895 | 5.918299  |
| 101 | 1 | 0 | -1.711485 | -1.834943 | 2.810611  |
| 102 | 1 | 0 | -0.379758 | -3.320941 | 6.616896  |
| 103 | 1 | 0 | -2.223226 | -2.740513 | 5.048939  |
| 104 | 1 | 0 | -0.392726 | -2.495882 | -1.057608 |
| 105 | 1 | 0 | 2.625339  | -3.521548 | 1.832800  |
| 106 | 1 | 0 | 3.060641  | -5.630491 | 0.636610  |
| 107 | 1 | 0 | 0.062453  | -4.604939 | -2.275127 |
| 108 | 1 | 0 | 1.784177  | -6.187032 | -1.427326 |
| 109 | 1 | 0 | 2.035160  | 0.284417  | 3.411378  |
| 110 | 1 | 0 | 4.073400  | 1.686440  | 3.504376  |
| 111 | 1 | 0 | 7.033891  | 1.488195  | -0.300248 |
| 112 | 1 | 0 | 5.833846  | 2.803545  | -0.629815 |
| 113 | 1 | 0 | -5.588950 | -1.143004 | -1.057914 |
| 114 | 1 | 0 | -6.035003 | -2.696195 | -1.800012 |
| 115 | 1 | 0 | -5.101202 | -1.498545 | -2.716006 |
| 116 | 1 | 0 | -2.471427 | -3.992386 | -2.035214 |

|     |   |   |           |           |           |
|-----|---|---|-----------|-----------|-----------|
| 117 | 1 | 0 | -3.430778 | -3.155697 | -3.266319 |
| 118 | 1 | 0 | -4.165975 | -4.446679 | -2.303211 |
| 119 | 1 | 0 | -5.228803 | -3.514550 | 1.912707  |
| 120 | 1 | 0 | -5.872320 | -4.031518 | 0.345500  |
| 121 | 1 | 0 | -5.916397 | -2.315218 | 0.807884  |
| 122 | 1 | 0 | -3.038808 | -4.461904 | 1.605441  |
| 123 | 1 | 0 | -2.057591 | -4.171358 | 0.166121  |
| 124 | 1 | 0 | -3.516889 | -5.180219 | 0.056768  |

```

-----
Zero-point correction=                0.992511
(Hartree/Particle)
Thermal correction to Energy=         1.056833
Thermal correction to Enthalpy=       1.057777
Thermal correction to Gibbs Free Energy= 0.891208
Sum of electronic and zero-point Energies= -3710.080490
Sum of electronic and thermal Energies= -3710.016168
Sum of electronic and thermal Enthalpies= -3710.015224
Sum of electronic and thermal Free Energies= -3710.181793

```

### II<sub>s</sub> (Scheme 4 and Figure 1, main manuscript)

Standard orientation:

| Center<br>Number | Atomic<br>Number | Atomic<br>Type | Coordinates (Angstroms) |           |           |
|------------------|------------------|----------------|-------------------------|-----------|-----------|
|                  |                  |                | X                       | Y         | Z         |
| 1                | 8                | 0              | -5.866600               | -1.333254 | 0.691494  |
| 2                | 8                | 0              | -3.795888               | -0.562112 | 1.288407  |
| 3                | 6                | 0              | -5.668158               | -1.787128 | 2.056390  |
| 4                | 6                | 0              | -4.475612               | -0.875585 | 2.540425  |
| 5                | 6                | 0              | -6.977762               | -1.607585 | 2.823549  |
| 6                | 6                | 0              | -5.307746               | -3.277144 | 1.975399  |
| 7                | 6                | 0              | -4.941189               | 0.460622  | 3.136225  |
| 8                | 6                | 0              | -3.480625               | -1.554775 | 3.479847  |
| 9                | 5                | 0              | -4.711887               | -0.721502 | 0.265922  |
| 10               | 6                | 0              | -1.952913               | -2.861036 | -2.450032 |
| 11               | 6                | 0              | -3.024957               | -2.234540 | -1.849189 |
| 12               | 6                | 0              | -0.938908               | -2.080473 | -3.147080 |
| 13               | 6                | 0              | -3.212331               | -0.825974 | -1.843406 |
| 14               | 6                | 0              | -1.833301               | -4.358535 | -2.530087 |
| 15               | 8                | 0              | -0.011987               | -2.638451 | -3.801140 |
| 16               | 6                | 0              | -1.085288               | -0.626954 | -3.093850 |
| 17               | 6                | 0              | -4.510817               | -0.270443 | -1.238971 |
| 18               | 6                | 0              | -2.251850               | -0.055272 | -2.488671 |
| 19               | 6                | 0              | -0.295032               | 0.139894  | -4.147036 |
| 20               | 6                | 0              | -4.714649               | 1.232789  | -1.390140 |
| 21               | 6                | 0              | -4.064333               | 2.164259  | -0.564294 |
| 22               | 6                | 0              | -5.583430               | 1.725201  | -2.376037 |
| 23               | 6                | 0              | -4.274679               | 3.535809  | -0.719670 |
| 24               | 6                | 0              | -5.799823               | 3.095221  | -2.533211 |
| 25               | 6                | 0              | -5.144984               | 4.007785  | -1.704203 |
| 26               | 1                | 0              | -7.340270               | -0.578586 | 2.770125  |
| 27               | 1                | 0              | -6.855486               | -1.882237 | 3.877767  |
| 28               | 1                | 0              | -7.745998               | -2.256965 | 2.391755  |
| 29               | 1                | 0              | -4.382201               | -3.429681 | 1.411188  |
| 30               | 1                | 0              | -6.109571               | -3.807445 | 1.452451  |
| 31               | 1                | 0              | -5.191071               | -3.722046 | 2.969466  |
| 32               | 1                | 0              | -4.075620               | 1.117801  | 3.264606  |
| 33               | 1                | 0              | -5.417631               | 0.323935  | 4.112768  |
| 34               | 1                | 0              | -5.646946               | 0.968066  | 2.471532  |

|    |    |   |           |           |           |
|----|----|---|-----------|-----------|-----------|
| 35 | 1  | 0 | -2.673279 | -0.860270 | 3.732805  |
| 36 | 1  | 0 | -3.026510 | -2.437336 | 3.023804  |
| 37 | 1  | 0 | -3.969716 | -1.856944 | 4.413280  |
| 38 | 1  | 0 | -3.794269 | -2.857695 | -1.387066 |
| 39 | 1  | 0 | -1.855331 | -4.692216 | -3.575401 |
| 40 | 1  | 0 | -2.642673 | -4.858081 | -1.985390 |
| 41 | 1  | 0 | -0.873176 | -4.700598 | -2.126012 |
| 42 | 1  | 0 | -5.340448 | -0.745435 | -1.783492 |
| 43 | 1  | 0 | -2.410535 | 1.015920  | -2.589237 |
| 44 | 1  | 0 | -0.587545 | 1.194982  | -4.187503 |
| 45 | 1  | 0 | -0.483944 | -0.299130 | -5.136306 |
| 46 | 1  | 0 | 0.789594  | 0.087224  | -4.001747 |
| 47 | 1  | 0 | -3.391738 | 1.809777  | 0.210737  |
| 48 | 1  | 0 | -6.096245 | 1.021697  | -3.027972 |
| 49 | 1  | 0 | -3.753299 | 4.235791  | -0.071818 |
| 50 | 1  | 0 | -6.481218 | 3.448095  | -3.303593 |
| 51 | 1  | 0 | -5.311358 | 5.075386  | -1.823301 |
| 52 | 29 | 0 | -0.065217 | -0.191627 | -1.218273 |
| 53 | 15 | 0 | 0.522434  | 1.889750  | -0.142284 |
| 54 | 6  | 0 | -0.124602 | 3.489671  | -0.816151 |
| 55 | 6  | 0 | -0.639738 | 3.493116  | -2.120920 |
| 56 | 6  | 0 | -1.122718 | 4.668868  | -2.697541 |
| 57 | 6  | 0 | -0.125595 | 4.691101  | -0.089058 |
| 58 | 6  | 0 | 0.342204  | 2.126790  | 1.675991  |
| 59 | 6  | 0 | -1.112210 | 5.858258  | -1.968450 |
| 60 | 6  | 0 | -0.617233 | 5.864670  | -0.662178 |
| 61 | 6  | 0 | -0.773383 | 1.560954  | 2.311974  |
| 62 | 6  | 0 | 1.239363  | 2.901337  | 2.428845  |
| 63 | 6  | 0 | 1.018724  | 3.116055  | 3.789783  |
| 64 | 6  | 0 | 2.341355  | 1.957384  | -0.494172 |
| 65 | 6  | 0 | -0.991749 | 1.783128  | 3.673996  |
| 66 | 6  | 0 | -0.100100 | 2.560657  | 4.414303  |
| 67 | 6  | 0 | 2.783884  | 2.793241  | -1.529590 |
| 68 | 6  | 0 | 3.259562  | 1.054395  | 0.133837  |
| 69 | 6  | 0 | 4.109080  | 2.798204  | -1.996141 |
| 70 | 6  | 0 | 4.562208  | 1.098721  | -0.341286 |
| 71 | 6  | 0 | 4.979979  | 1.926225  | -1.381589 |
| 72 | 8  | 0 | 6.319610  | 1.749369  | -1.607861 |
| 73 | 8  | 0 | 5.640213  | 0.388844  | 0.131541  |
| 74 | 6  | 0 | 6.688395  | 0.613860  | -0.815735 |
| 75 | 15 | 0 | 1.536824  | -1.711685 | -0.233757 |
| 76 | 6  | 0 | 0.780110  | -3.307270 | 0.296403  |
| 77 | 6  | 0 | 1.490000  | -4.517783 | 0.295306  |
| 78 | 6  | 0 | 0.881434  | -5.694779 | 0.734070  |
| 79 | 6  | 0 | -0.555830 | -3.300041 | 0.727569  |
| 80 | 6  | 0 | 2.991883  | -2.214000 | -1.249150 |
| 81 | 6  | 0 | -0.441187 | -5.675396 | 1.180854  |
| 82 | 6  | 0 | -1.157253 | -4.477001 | 1.176001  |
| 83 | 6  | 0 | 2.808667  | -2.377779 | -2.632936 |
| 84 | 6  | 0 | 4.249387  | -2.473381 | -0.679743 |
| 85 | 6  | 0 | 5.313029  | -2.888365 | -1.483796 |
| 86 | 6  | 0 | 2.293301  | -1.063532 | 1.331288  |
| 87 | 6  | 0 | 3.880439  | -2.793486 | -3.427456 |
| 88 | 6  | 0 | 5.130817  | -3.045865 | -2.860521 |
| 89 | 6  | 0 | 2.171562  | -1.785807 | 2.526734  |
| 90 | 6  | 0 | 2.991318  | 0.183986  | 1.323009  |
| 91 | 6  | 0 | 2.724084  | -1.349769 | 3.743211  |
| 92 | 6  | 0 | 3.549371  | 0.568534  | 2.532728  |
| 93 | 6  | 0 | 3.420268  | -0.161985 | 3.710446  |
| 94 | 8  | 0 | 4.046458  | 0.496475  | 4.738649  |
| 95 | 8  | 0 | 4.261749  | 1.718674  | 2.788654  |

|     |   |   |           |           |           |
|-----|---|---|-----------|-----------|-----------|
| 96  | 6 | 0 | 4.761702  | 1.570451  | 4.119682  |
| 97  | 1 | 0 | -0.663684 | 2.569090  | -2.686323 |
| 98  | 1 | 0 | -1.518989 | 4.648357  | -3.708758 |
| 99  | 1 | 0 | 0.249473  | 4.714660  | 0.928181  |
| 100 | 1 | 0 | -1.494843 | 6.773910  | -2.411334 |
| 101 | 1 | 0 | -0.612281 | 6.786064  | -0.085603 |
| 102 | 1 | 0 | -1.469940 | 0.944337  | 1.748397  |
| 103 | 1 | 0 | 2.121230  | 3.322262  | 1.955370  |
| 104 | 1 | 0 | 1.720057  | 3.718627  | 4.361337  |
| 105 | 1 | 0 | -1.858658 | 1.344312  | 4.159610  |
| 106 | 1 | 0 | -0.272564 | 2.728312  | 5.474059  |
| 107 | 1 | 0 | 2.080306  | 3.468283  | -2.001824 |
| 108 | 1 | 0 | 4.428009  | 3.457436  | -2.795808 |
| 109 | 1 | 0 | 7.617958  | 0.830043  | -0.283603 |
| 110 | 1 | 0 | 6.788851  | -0.267560 | -1.463014 |
| 111 | 1 | 0 | 2.517603  | -4.541670 | -0.052621 |
| 112 | 1 | 0 | 1.440699  | -6.626509 | 0.722786  |
| 113 | 1 | 0 | -1.133158 | -2.380061 | 0.699359  |
| 114 | 1 | 0 | -0.915859 | -6.592620 | 1.519283  |
| 115 | 1 | 0 | -2.193335 | -4.462101 | 1.502980  |
| 116 | 1 | 0 | 1.828668  | -2.230920 | -3.092439 |
| 117 | 1 | 0 | 4.403061  | -2.346565 | 0.386998  |
| 118 | 1 | 0 | 6.279669  | -3.097711 | -1.031470 |
| 119 | 1 | 0 | 3.726370  | -2.925514 | -4.494965 |
| 120 | 1 | 0 | 5.959091  | -3.371081 | -3.485363 |
| 121 | 1 | 0 | 1.641971  | -2.730430 | 2.520986  |
| 122 | 1 | 0 | 2.616313  | -1.925046 | 4.656158  |
| 123 | 1 | 0 | 5.832833  | 1.325466  | 4.084147  |
| 124 | 1 | 0 | 4.588175  | 2.492945  | 4.679501  |

-----  
Zero-point correction= 0.993692  
(Hartree/Particle)  
Thermal correction to Energy= 1.058463  
Thermal correction to Enthalpy= 1.059407  
Thermal correction to Gibbs Free Energy= 0.889150  
Sum of electronic and zero-point Energies= -3710.142353  
Sum of electronic and thermal Energies= -3710.077583  
Sum of electronic and thermal Enthalpies= -3710.076639  
Sum of electronic and thermal Free Energies= -3710.246896

## II<sub>R</sub> (Scheme 4, main manuscript)

Standard orientation:

| Center<br>Number | Atomic<br>Number | Atomic<br>Type | Coordinates (Angstroms) |           |           |
|------------------|------------------|----------------|-------------------------|-----------|-----------|
|                  |                  |                | X                       | Y         | Z         |
| 1                | 29               | 0              | 0.015539                | 0.492042  | -1.151949 |
| 2                | 15               | 0              | -0.267447               | -1.806990 | -0.407359 |
| 3                | 6                | 0              | 0.587313                | -3.186382 | -1.303551 |
| 4                | 6                | 0              | 0.840043                | -3.037548 | -2.676404 |
| 5                | 6                | 0              | 1.475019                | -4.048279 | -3.400790 |
| 6                | 6                | 0              | 0.999043                | -4.368565 | -0.668066 |
| 7                | 6                | 0              | 1.882382                | -5.219049 | -2.758140 |
| 8                | 6                | 0              | 1.644112                | -5.374449 | -1.391091 |
| 9                | 6                | 0              | -2.070514               | -2.177075 | -0.648818 |
| 10               | 6                | 0              | -2.433371               | -3.031524 | -1.700825 |
| 11               | 6                | 0              | -3.090127               | -1.494830 | 0.092508  |
| 12               | 6                | 0              | -3.765563               | -3.263288 | -2.080018 |
| 13               | 6                | 0              | -4.394366               | -1.756781 | -0.303847 |

|    |    |   |           |           |           |
|----|----|---|-----------|-----------|-----------|
| 14 | 6  | 0 | -4.732384 | -2.598598 | -1.360250 |
| 15 | 8  | 0 | -6.094481 | -2.665689 | -1.488320 |
| 16 | 8  | 0 | -5.545495 | -1.280216 | 0.278534  |
| 17 | 6  | 0 | -6.609094 | -1.672160 | -0.594415 |
| 18 | 15 | 0 | -1.847351 | 1.582279  | -0.094029 |
| 19 | 6  | 0 | -1.551559 | 3.293598  | 0.527367  |
| 20 | 6  | 0 | -2.538141 | 4.291675  | 0.502597  |
| 21 | 6  | 0 | -2.270719 | 5.560118  | 1.020416  |
| 22 | 6  | 0 | -0.292400 | 3.596200  | 1.066681  |
| 23 | 6  | 0 | -3.315265 | 1.764552  | -1.190897 |
| 24 | 6  | 0 | -1.020710 | 5.844970  | 1.574187  |
| 25 | 6  | 0 | -0.031824 | 4.859855  | 1.597843  |
| 26 | 6  | 0 | -3.086292 | 2.018306  | -2.554426 |
| 27 | 6  | 0 | -4.631755 | 1.718791  | -0.704306 |
| 28 | 6  | 0 | -5.708112 | 1.918889  | -1.570957 |
| 29 | 6  | 0 | -2.469552 | 0.691185  | 1.410374  |
| 30 | 6  | 0 | -4.171624 | 2.217724  | -3.412142 |
| 31 | 6  | 0 | -5.479515 | 2.165321  | -2.927592 |
| 32 | 6  | 0 | -2.447381 | 1.341112  | 2.653617  |
| 33 | 6  | 0 | -2.917716 | -0.664277 | 1.328261  |
| 34 | 6  | 0 | -2.861710 | 0.728665  | 3.848062  |
| 35 | 6  | 0 | -3.345295 | -1.227340 | 2.522350  |
| 36 | 6  | 0 | -3.315011 | -0.567554 | 3.746883  |
| 37 | 8  | 0 | -3.766756 | -1.401582 | 4.738709  |
| 38 | 8  | 0 | -3.818510 | -2.507767 | 2.710357  |
| 39 | 6  | 0 | -4.289492 | -2.547229 | 4.059688  |
| 40 | 1  | 0 | 0.533813  | -2.129697 | -3.183534 |
| 41 | 1  | 0 | 1.657386  | -3.914286 | -4.463618 |
| 42 | 1  | 0 | 0.819061  | -4.507448 | 0.392611  |
| 43 | 1  | 0 | 2.384123  | -6.003792 | -3.317883 |
| 44 | 1  | 0 | 1.957076  | -6.282884 | -0.882993 |
| 45 | 1  | 0 | -1.659489 | -3.544505 | -2.257299 |
| 46 | 1  | 0 | -4.016459 | -3.934474 | -2.893822 |
| 47 | 1  | 0 | -7.423161 | -2.101370 | -0.004682 |
| 48 | 1  | 0 | -6.946540 | -0.801612 | -1.172185 |
| 49 | 1  | 0 | -3.513480 | 4.082890  | 0.075403  |
| 50 | 1  | 0 | -3.041089 | 6.326117  | 0.988804  |
| 51 | 1  | 0 | 0.493894  | 2.849404  | 1.064246  |
| 52 | 1  | 0 | -0.815615 | 6.833643  | 1.976302  |
| 53 | 1  | 0 | 0.949086  | 5.072307  | 2.013618  |
| 54 | 1  | 0 | -2.074087 | 2.107595  | -2.954444 |
| 55 | 1  | 0 | -4.818674 | 1.523339  | 0.346949  |
| 56 | 1  | 0 | -6.723843 | 1.895686  | -1.182709 |
| 57 | 1  | 0 | -3.983388 | 2.422691  | -4.462402 |
| 58 | 1  | 0 | -6.318472 | 2.323309  | -3.600778 |
| 59 | 1  | 0 | -2.109378 | 2.368255  | 2.704558  |
| 60 | 1  | 0 | -2.835121 | 1.254524  | 4.796059  |
| 61 | 1  | 0 | -5.388177 | -2.508191 | 4.066024  |
| 62 | 1  | 0 | -3.926049 | -3.455895 | 4.546155  |
| 63 | 6  | 0 | 0.134205  | -2.196532 | 1.347000  |
| 64 | 6  | 0 | 1.314136  | -1.645074 | 1.870734  |
| 65 | 6  | 0 | -0.635762 | -3.051700 | 2.148992  |
| 66 | 6  | 0 | -0.238634 | -3.334740 | 3.457549  |
| 67 | 6  | 0 | 1.708548  | -1.932021 | 3.178757  |
| 68 | 6  | 0 | 0.930525  | -2.773557 | 3.976351  |
| 69 | 1  | 0 | 1.942423  | -1.012841 | 1.250400  |
| 70 | 1  | 0 | -1.549741 | -3.488919 | 1.760248  |
| 71 | 1  | 0 | -0.843696 | -3.996956 | 4.071689  |
| 72 | 1  | 0 | 2.620105  | -1.489384 | 3.570834  |
| 73 | 1  | 0 | 1.233518  | -2.992517 | 4.996837  |
| 74 | 8  | 0 | 6.202425  | 0.230486  | -0.520755 |



|     |   |   |           |           |           |
|-----|---|---|-----------|-----------|-----------|
| 75  | 8 | 0 | 4.199564  | -0.829489 | -0.200290 |
| 76  | 6 | 0 | 6.541947  | -1.135201 | -0.152931 |
| 77  | 6 | 0 | 5.180542  | -1.893369 | -0.394215 |
| 78  | 6 | 0 | 7.708626  | -1.595273 | -1.025493 |
| 79  | 6 | 0 | 6.967232  | -1.101375 | 1.321696  |
| 80  | 6 | 0 | 5.012058  | -2.395154 | -1.834464 |
| 81  | 6 | 0 | 4.877184  | -3.019815 | 0.591711  |
| 82  | 5 | 0 | 4.840549  | 0.373111  | -0.400862 |
| 83  | 6 | 0 | 1.231283  | 3.630362  | -2.050417 |
| 84  | 6 | 0 | 2.312561  | 3.302792  | -1.260886 |
| 85  | 6 | 0 | 0.612269  | 2.628852  | -2.911632 |
| 86  | 6 | 0 | 2.881753  | 1.999843  | -1.199246 |
| 87  | 6 | 0 | 0.703627  | 5.035038  | -2.156108 |
| 88  | 8 | 0 | -0.318140 | 2.926109  | -3.712849 |
| 89  | 6 | 0 | 1.166051  | 1.278113  | -2.835368 |
| 90  | 6 | 0 | 4.161212  | 1.803589  | -0.388763 |
| 91  | 6 | 0 | 2.307876  | 1.022256  | -2.010021 |
| 92  | 6 | 0 | 0.853617  | 0.384347  | -4.026752 |
| 93  | 6 | 0 | 4.045223  | 2.175547  | 1.095621  |
| 94  | 6 | 0 | 5.070479  | 2.889511  | 1.733936  |
| 95  | 6 | 0 | 2.946917  | 1.772053  | 1.869580  |
| 96  | 6 | 0 | 4.997900  | 3.198231  | 3.094123  |
| 97  | 6 | 0 | 2.869447  | 2.075756  | 3.229796  |
| 98  | 6 | 0 | 3.896089  | 2.793200  | 3.849737  |
| 99  | 1 | 0 | 7.482237  | -1.495629 | -2.089425 |
| 100 | 1 | 0 | 7.964072  | -2.640907 | -0.817755 |
| 101 | 1 | 0 | 8.590096  | -0.982716 | -0.810081 |
| 102 | 1 | 0 | 6.151486  | -0.753639 | 1.963138  |
| 103 | 1 | 0 | 7.802703  | -0.403371 | 1.434129  |
| 104 | 1 | 0 | 7.291515  | -2.087389 | 1.671310  |
| 105 | 1 | 0 | 3.980960  | -2.730459 | -1.979851 |
| 106 | 1 | 0 | 5.679854  | -3.237259 | -2.045760 |
| 107 | 1 | 0 | 5.217254  | -1.600434 | -2.558830 |
| 108 | 1 | 0 | 3.904863  | -3.463558 | 0.356008  |
| 109 | 1 | 0 | 4.843403  | -2.658513 | 1.622135  |
| 110 | 1 | 0 | 5.635258  | -3.808863 | 0.522991  |
| 111 | 1 | 0 | 2.773253  | 4.088833  | -0.661196 |
| 112 | 1 | 0 | 0.788786  | 5.403168  | -3.186415 |
| 113 | 1 | 0 | 1.241089  | 5.719650  | -1.490887 |
| 114 | 1 | 0 | -0.364836 | 5.074376  | -1.911463 |
| 115 | 1 | 0 | 4.926172  | 2.476590  | -0.804397 |
| 116 | 1 | 0 | 2.760499  | 0.034444  | -2.063216 |
| 117 | 1 | 0 | 1.493954  | -0.504212 | -4.032938 |
| 118 | 1 | 0 | 1.036252  | 0.941467  | -4.955465 |
| 119 | 1 | 0 | -0.194887 | 0.066661  | -4.077981 |
| 120 | 1 | 0 | 5.933755  | 3.208189  | 1.154071  |
| 121 | 1 | 0 | 2.142881  | 1.221075  | 1.391167  |
| 122 | 1 | 0 | 5.802599  | 3.760518  | 3.561708  |
| 123 | 1 | 0 | 2.004591  | 1.752092  | 3.804132  |
| 124 | 1 | 0 | 3.835929  | 3.035723  | 4.907535  |

-----  
Zero-point correction=  
(Hartree/Particle)

0.993684

Thermal correction to Energy=

1.058488

Thermal correction to Enthalpy=

1.059432

Thermal correction to Gibbs Free Energy=

0.888183

Sum of electronic and zero-point Energies=

-3710.143028

Sum of electronic and thermal Energies=

-3710.078224

Sum of electronic and thermal Enthalpies=

-3710.077280

Sum of electronic and thermal Free Energies=

-3710.248529

III<sub>s</sub> (Figure 1, main manuscript)

Standard orientation:

| Center<br>Number | Atomic<br>Number | Atomic<br>Type | Coordinates (Angstroms) |           |           |
|------------------|------------------|----------------|-------------------------|-----------|-----------|
|                  |                  |                | X                       | Y         | Z         |
| 1                | 8                | 0              | -7.134614               | -0.816721 | -1.617635 |
| 2                | 8                | 0              | -6.413269               | -1.049825 | 0.542104  |
| 3                | 6                | 0              | -7.096223               | -2.248626 | -1.370966 |
| 4                | 6                | 0              | -7.063508               | -2.309040 | 0.203094  |
| 5                | 6                | 0              | -8.323362               | -2.884497 | -2.022206 |
| 6                | 6                | 0              | -5.813262               | -2.777912 | -2.026990 |
| 7                | 6                | 0              | -8.458594               | -2.271367 | 0.843258  |
| 8                | 6                | 0              | -6.249121               | -3.458226 | 0.792613  |
| 9                | 5                | 0              | -6.615877               | -0.182126 | -0.512654 |
| 10               | 6                | 0              | -2.772176               | 1.207898  | -2.124053 |
| 11               | 6                | 0              | -4.147392               | 1.122559  | -1.907879 |
| 12               | 6                | 0              | -1.925260               | 1.691070  | -1.090023 |
| 13               | 6                | 0              | -4.740924               | 1.493624  | -0.690177 |
| 14               | 6                | 0              | -2.155447               | 0.816960  | -3.442232 |
| 15               | 8                | 0              | -0.617310               | 1.815727  | -1.296218 |
| 16               | 6                | 0              | -2.515123               | 2.074488  | 0.143410  |
| 17               | 6                | 0              | -6.270119               | 1.361468  | -0.533331 |
| 18               | 6                | 0              | -3.899092               | 1.962780  | 0.322288  |
| 19               | 6                | 0              | -1.635973               | 2.627045  | 1.237137  |
| 20               | 6                | 0              | -6.872068               | 2.178022  | 0.601739  |
| 21               | 6                | 0              | -6.908860               | 1.721122  | 1.929181  |
| 22               | 6                | 0              | -7.407479               | 3.446882  | 0.330563  |
| 23               | 6                | 0              | -7.458947               | 2.506931  | 2.944750  |
| 24               | 6                | 0              | -7.961511               | 4.233001  | 1.341387  |
| 25               | 6                | 0              | -7.989059               | 3.765478  | 2.656817  |
| 26               | 1                | 0              | -9.250787               | -2.424029 | -1.673952 |
| 27               | 1                | 0              | -8.365279               | -3.959716 | -1.812329 |
| 28               | 1                | 0              | -8.270178               | -2.753877 | -3.107951 |
| 29               | 1                | 0              | -4.922301               | -2.320188 | -1.585878 |
| 30               | 1                | 0              | -5.829369               | -2.522551 | -3.091195 |
| 31               | 1                | 0              | -5.730846               | -3.866392 | -1.935690 |
| 32               | 1                | 0              | -8.351315               | -2.100869 | 1.919109  |
| 33               | 1                | 0              | -8.997332               | -3.213722 | 0.696207  |
| 34               | 1                | 0              | -9.063663               | -1.457035 | 0.432780  |
| 35               | 1                | 0              | -6.269079               | -3.399018 | 1.886417  |
| 36               | 1                | 0              | -5.206574               | -3.424106 | 0.470197  |
| 37               | 1                | 0              | -6.675187               | -4.425410 | 0.501096  |
| 38               | 1                | 0              | -4.782902               | 0.762328  | -2.716920 |
| 39               | 1                | 0              | -1.622446               | 1.659960  | -3.900834 |
| 40               | 1                | 0              | -2.914852               | 0.464307  | -4.149086 |
| 41               | 1                | 0              | -1.408387               | 0.020766  | -3.315293 |
| 42               | 1                | 0              | -6.709468               | 1.740551  | -1.465965 |
| 43               | 1                | 0              | -4.325793               | 2.277333  | 1.271395  |
| 44               | 1                | 0              | -2.226301               | 2.909253  | 2.115808  |
| 45               | 1                | 0              | -1.081414               | 3.510066  | 0.893591  |
| 46               | 1                | 0              | -0.878402               | 1.897212  | 1.562787  |
| 47               | 1                | 0              | -6.513140               | 0.738353  | 2.163779  |
| 48               | 1                | 0              | -7.385528               | 3.822270  | -0.690231 |
| 49               | 1                | 0              | -7.475931               | 2.130060  | 3.964828  |
| 50               | 1                | 0              | -8.371519               | 5.210955  | 1.100673  |
| 51               | 1                | 0              | -8.419984               | 4.374596  | 3.447429  |
| 52               | 29               | 0              | 0.781082                | 0.744012  | -0.535522 |
| 53               | 15               | 0              | 1.098737                | -1.381194 | 0.323497  |
| 54               | 6                | 0              | 1.611689                | -2.724856 | -0.830668 |

|     |    |   |           |           |           |
|-----|----|---|-----------|-----------|-----------|
| 55  | 6  | 0 | 1.177716  | -2.639912 | -2.162302 |
| 56  | 6  | 0 | 2.348796  | -3.847688 | -0.423838 |
| 57  | 6  | 0 | 2.629877  | -4.871535 | -1.329978 |
| 58  | 6  | 0 | 2.431002  | -1.272872 | 1.598268  |
| 59  | 6  | 0 | 1.461178  | -3.664571 | -3.067211 |
| 60  | 6  | 0 | 2.185006  | -4.783449 | -2.651942 |
| 61  | 6  | 0 | 2.097040  | -1.407277 | 2.952912  |
| 62  | 6  | 0 | 3.760642  | -0.887784 | 1.224520  |
| 63  | 6  | 0 | 3.022513  | -1.204353 | 3.991607  |
| 64  | 6  | 0 | 4.648757  | -0.712035 | 2.274260  |
| 65  | 6  | 0 | 4.300242  | -0.855727 | 3.615945  |
| 66  | 8  | 0 | 5.394880  | -0.630975 | 4.408803  |
| 67  | 8  | 0 | 5.983116  | -0.395475 | 2.183686  |
| 68  | 6  | 0 | 6.420446  | -0.162195 | 3.525699  |
| 69  | 15 | 0 | 2.958188  | 1.703900  | -0.613227 |
| 70  | 6  | 0 | 3.108162  | 2.966022  | -1.950205 |
| 71  | 6  | 0 | 4.285380  | 3.695317  | -2.193435 |
| 72  | 6  | 0 | 4.325457  | 4.654175  | -3.204143 |
| 73  | 6  | 0 | 1.963043  | 3.232182  | -2.719488 |
| 74  | 6  | 0 | 3.703534  | 2.549860  | 0.846277  |
| 75  | 6  | 0 | 3.187418  | 4.903387  | -3.977821 |
| 76  | 6  | 0 | 2.010760  | 4.197049  | -3.730824 |
| 77  | 6  | 0 | 2.833268  | 3.220500  | 1.719816  |
| 78  | 6  | 0 | 5.084947  | 2.598707  | 1.088294  |
| 79  | 6  | 0 | 5.584628  | 3.320014  | 2.174644  |
| 80  | 6  | 0 | 4.139724  | 0.353756  | -1.052908 |
| 81  | 6  | 0 | 3.335100  | 3.939575  | 2.805804  |
| 82  | 6  | 0 | 4.711570  | 3.992681  | 3.033814  |
| 83  | 6  | 0 | 4.766871  | 0.350771  | -2.305939 |
| 84  | 6  | 0 | 4.303359  | -0.762657 | -0.169121 |
| 85  | 6  | 0 | 5.587322  | -0.703029 | -2.746025 |
| 86  | 6  | 0 | 5.134048  | -1.772575 | -0.627983 |
| 87  | 6  | 0 | 5.753832  | -1.756524 | -1.875450 |
| 88  | 8  | 0 | 6.512505  | -2.886613 | -2.034908 |
| 89  | 8  | 0 | 5.488116  | -2.919164 | 0.041864  |
| 90  | 6  | 0 | 6.256175  | -3.696348 | -0.882056 |
| 91  | 6  | 0 | -0.367741 | -2.109565 | 1.173356  |
| 92  | 6  | 0 | -0.353259 | -3.368617 | 1.799828  |
| 93  | 6  | 0 | -1.510656 | -3.876739 | 2.386106  |
| 94  | 6  | 0 | -1.568187 | -1.384801 | 1.129035  |
| 95  | 6  | 0 | -2.701251 | -3.143269 | 2.339990  |
| 96  | 6  | 0 | -2.732465 | -1.901122 | 1.706438  |
| 97  | 1  | 0 | 0.615363  | -1.768771 | -2.489755 |
| 98  | 1  | 0 | 2.718751  | -3.915446 | 0.594793  |
| 99  | 1  | 0 | 3.190144  | -5.743478 | -1.000992 |
| 100 | 1  | 0 | 1.118145  | -3.585856 | -4.095174 |
| 101 | 1  | 0 | 2.404526  | -5.582526 | -3.355005 |
| 102 | 1  | 0 | 1.083123  | -1.677281 | 3.222431  |
| 103 | 1  | 0 | 2.743409  | -1.319024 | 5.033132  |
| 104 | 1  | 0 | 7.341901  | -0.721351 | 3.709961  |
| 105 | 1  | 0 | 6.568159  | 0.914850  | 3.678641  |
| 106 | 1  | 0 | 5.170552  | 3.519703  | -1.588836 |
| 107 | 1  | 0 | 5.241129  | 5.211477  | -3.384296 |
| 108 | 1  | 0 | 1.028592  | 2.714619  | -2.509648 |
| 109 | 1  | 0 | 3.218798  | 5.654542  | -4.762887 |
| 110 | 1  | 0 | 1.118627  | 4.399351  | -4.317298 |
| 111 | 1  | 0 | 1.760729  | 3.179274  | 1.546115  |
| 112 | 1  | 0 | 5.769025  | 2.063116  | 0.436824  |
| 113 | 1  | 0 | 6.657797  | 3.363773  | 2.344688  |
| 114 | 1  | 0 | 2.650317  | 4.455399  | 3.473367  |
| 115 | 1  | 0 | 5.102811  | 4.554285  | 3.877993  |

|     |   |   |           |           |           |
|-----|---|---|-----------|-----------|-----------|
| 116 | 1 | 0 | 4.619082  | 1.193047  | -2.971014 |
| 117 | 1 | 0 | 6.067175  | -0.683427 | -3.718281 |
| 118 | 1 | 0 | 7.205819  | -3.979498 | -0.417645 |
| 119 | 1 | 0 | 5.681216  | -4.582255 | -1.180384 |
| 120 | 1 | 0 | 0.561131  | -3.953639 | 1.829344  |
| 121 | 1 | 0 | -1.486892 | -4.848578 | 2.872439  |
| 122 | 1 | 0 | -1.609055 | -0.420613 | 0.630625  |
| 123 | 1 | 0 | -3.603389 | -3.546078 | 2.792535  |
| 124 | 1 | 0 | -3.656879 | -1.333601 | 1.643421  |

```

-----
Zero-point correction=                0.993511
(Hartree/Particle)
Thermal correction to Energy=         1.058456
Thermal correction to Enthalpy=       1.059400
Thermal correction to Gibbs Free Energy= 0.885099
Sum of electronic and zero-point Energies= -3710.176322
Sum of electronic and thermal Energies= -3710.111378
Sum of electronic and thermal Enthalpies= -3710.110434
Sum of electronic and thermal Free Energies= -3710.284734

```

#### IV<sub>R</sub> (Reference 15, main manuscript)

Standard orientation:

| Center<br>Number | Atomic<br>Number | Atomic<br>Type | Coordinates (Angstroms) |           |           |
|------------------|------------------|----------------|-------------------------|-----------|-----------|
|                  |                  |                | X                       | Y         | Z         |
| 1                | 8                | 0              | -3.014240               | -1.542623 | -1.582009 |
| 2                | 8                | 0              | -2.650586               | -2.530480 | 0.442685  |
| 3                | 6                | 0              | -3.544919               | -2.893972 | -1.719527 |
| 4                | 6                | 0              | -3.632101               | -3.382811 | -0.224061 |
| 5                | 6                | 0              | -4.883403               | -2.809881 | -2.453534 |
| 6                | 6                | 0              | -2.533928               | -3.678285 | -2.568248 |
| 7                | 6                | 0              | -4.986314               | -3.102245 | 0.440798  |
| 8                | 6                | 0              | -3.238759               | -4.842000 | 0.007209  |
| 9                | 5                | 0              | -2.417049               | -1.411362 | -0.341508 |
| 10               | 29               | 0              | -1.322142               | 0.238819  | 0.198430  |
| 11               | 15               | 0              | 0.252710                | 0.765326  | -1.584929 |
| 12               | 6                | 0              | -0.666512               | 1.015366  | -3.174406 |
| 13               | 6                | 0              | -1.957754               | 1.552240  | -3.081635 |
| 14               | 6                | 0              | -2.685472               | 1.875157  | -4.228409 |
| 15               | 6                | 0              | -0.118644               | 0.805300  | -4.451034 |
| 16               | 6                | 0              | 1.378120                | 2.234952  | -1.621815 |
| 17               | 6                | 0              | -2.133482               | 1.655229  | -5.490152 |
| 18               | 6                | 0              | -0.848689               | 1.117346  | -5.597824 |
| 19               | 6                | 0              | 1.228980                | 3.178320  | -0.598728 |
| 20               | 6                | 0              | 2.271726                | 2.501965  | -2.671670 |
| 21               | 6                | 0              | 2.990981                | 3.696667  | -2.692045 |
| 22               | 6                | 0              | 1.327032                | -0.713312 | -1.878672 |
| 23               | 6                | 0              | 1.944654                | 4.378951  | -0.619902 |
| 24               | 6                | 0              | 2.825794                | 4.638383  | -1.669541 |
| 25               | 6                | 0              | 0.887593                | -1.695943 | -2.778002 |
| 26               | 6                | 0              | 2.540979                | -0.911353 | -1.148620 |
| 27               | 6                | 0              | 1.631900                | -2.853023 | -3.064047 |
| 28               | 6                | 0              | 3.273040                | -2.037881 | -1.491249 |
| 29               | 6                | 0              | 2.840583                | -2.984083 | -2.415093 |
| 30               | 8                | 0              | 3.764407                | -3.989054 | -2.524053 |
| 31               | 8                | 0              | 4.487560                | -2.420009 | -0.978441 |
| 32               | 6                | 0              | 4.799504                | -3.678953 | -1.582152 |
| 33               | 15               | 0              | 1.008816                | -0.899830 | 1.683143  |

|    |   |   |           |           |           |
|----|---|---|-----------|-----------|-----------|
| 34 | 6 | 0 | 0.951862  | -0.916236 | 3.544127  |
| 35 | 6 | 0 | 2.072198  | -1.005739 | 4.388414  |
| 36 | 6 | 0 | 1.918008  | -1.115095 | 5.770228  |
| 37 | 6 | 0 | -0.323543 | -0.974910 | 4.127511  |
| 38 | 6 | 0 | 1.552379  | -2.660570 | 1.435471  |
| 39 | 6 | 0 | 0.641208  | -1.156301 | 6.336824  |
| 40 | 6 | 0 | -0.480308 | -1.094792 | 5.510876  |
| 41 | 6 | 0 | 0.574094  | -3.598687 | 1.074144  |
| 42 | 6 | 0 | 2.856955  | -3.104811 | 1.701591  |
| 43 | 6 | 0 | 3.175863  | -4.460031 | 1.609514  |
| 44 | 6 | 0 | 2.510732  | 0.095636  | 1.239461  |
| 45 | 6 | 0 | 0.898088  | -4.955143 | 0.979613  |
| 46 | 6 | 0 | 2.196707  | -5.389651 | 1.246234  |
| 47 | 6 | 0 | 3.035855  | 1.040934  | 2.131504  |
| 48 | 6 | 0 | 3.061109  | -0.007044 | -0.079277 |
| 49 | 6 | 0 | 4.135519  | 1.859887  | 1.817459  |
| 50 | 6 | 0 | 4.168469  | 0.781982  | -0.341968 |
| 51 | 6 | 0 | 4.695250  | 1.691300  | 0.570423  |
| 52 | 8 | 0 | 5.774733  | 2.331990  | 0.020764  |
| 53 | 8 | 0 | 4.893046  | 0.827829  | -1.506615 |
| 54 | 6 | 0 | 5.867604  | 1.861259  | -1.328803 |
| 55 | 1 | 0 | -5.576855 | -2.134915 | -1.947161 |
| 56 | 1 | 0 | -5.351351 | -3.798420 | -2.534337 |
| 57 | 1 | 0 | -4.721238 | -2.429180 | -3.467482 |
| 58 | 1 | 0 | -1.554712 | -3.721850 | -2.081664 |
| 59 | 1 | 0 | -2.410235 | -3.167586 | -3.528937 |
| 60 | 1 | 0 | -2.874071 | -4.700973 | -2.766455 |
| 61 | 1 | 0 | -4.901610 | -3.304488 | 1.513444  |
| 62 | 1 | 0 | -5.775823 | -3.743719 | 0.033077  |
| 63 | 1 | 0 | -5.285928 | -2.058288 | 0.319363  |
| 64 | 1 | 0 | -3.268739 | -5.063417 | 1.079261  |
| 65 | 1 | 0 | -2.229701 | -5.053704 | -0.354333 |
| 66 | 1 | 0 | -3.936569 | -5.521282 | -0.496951 |
| 67 | 1 | 0 | -2.392027 | 1.723386  | -2.102319 |
| 68 | 1 | 0 | -3.684351 | 2.292466  | -4.133332 |
| 69 | 1 | 0 | 0.874550  | 0.381143  | -4.555935 |
| 70 | 1 | 0 | -2.699297 | 1.900144  | -6.385086 |
| 71 | 1 | 0 | -0.410704 | 0.943284  | -6.577278 |
| 72 | 1 | 0 | 0.547231  | 2.971054  | 0.217061  |
| 73 | 1 | 0 | 2.408474  | 1.783960  | -3.473826 |
| 74 | 1 | 0 | 3.669752  | 3.901346  | -3.516907 |
| 75 | 1 | 0 | 1.787387  | 5.104262  | 0.173500  |
| 76 | 1 | 0 | 3.378378  | 5.573919  | -1.698369 |
| 77 | 1 | 0 | -0.061068 | -1.564805 | -3.284417 |
| 78 | 1 | 0 | 1.276503  | -3.599206 | -3.766047 |
| 79 | 1 | 0 | 5.758136  | -3.602670 | -2.107294 |
| 80 | 1 | 0 | 4.830732  | -4.455780 | -0.809703 |
| 81 | 1 | 0 | 3.072956  | -0.990970 | 3.969273  |
| 82 | 1 | 0 | 2.797847  | -1.175863 | 6.405667  |
| 83 | 1 | 0 | -1.202693 | -0.948753 | 3.490202  |
| 84 | 1 | 0 | 0.524231  | -1.242632 | 7.413742  |
| 85 | 1 | 0 | -1.478426 | -1.139055 | 5.938463  |
| 86 | 1 | 0 | -0.443025 | -3.270970 | 0.877679  |
| 87 | 1 | 0 | 3.630053  | -2.392236 | 1.972037  |
| 88 | 1 | 0 | 4.187443  | -4.791733 | 1.832386  |
| 89 | 1 | 0 | 0.130128  | -5.672656 | 0.701772  |
| 90 | 1 | 0 | 2.445456  | -6.445654 | 1.178152  |
| 91 | 1 | 0 | 2.585569  | 1.157075  | 3.109484  |
| 92 | 1 | 0 | 4.524270  | 2.584229  | 2.524660  |
| 93 | 1 | 0 | 6.867952  | 1.450493  | -1.502632 |
| 94 | 1 | 0 | 5.651818  | 2.686820  | -2.017174 |

|     |   |   |           |          |           |
|-----|---|---|-----------|----------|-----------|
| 95  | 6 | 0 | -0.449300 | 3.536943 | 2.606417  |
| 96  | 6 | 0 | -1.075596 | 2.334923 | 2.447833  |
| 97  | 6 | 0 | -0.800077 | 4.670486 | 1.739613  |
| 98  | 6 | 0 | -2.125140 | 2.116940 | 1.475312  |
| 99  | 6 | 0 | 0.615246  | 3.775154 | 3.641880  |
| 100 | 8 | 0 | -0.203887 | 5.761415 | 1.823085  |
| 101 | 6 | 0 | -1.882748 | 4.462203 | 0.760992  |
| 102 | 6 | 0 | -2.863659 | 0.896185 | 1.510638  |
| 103 | 6 | 0 | -2.490700 | 3.246619 | 0.650861  |
| 104 | 6 | 0 | -2.259335 | 5.643099 | -0.088943 |
| 105 | 6 | 0 | -4.299453 | 0.772232 | 1.124209  |
| 106 | 6 | 0 | -5.219301 | 0.488420 | 2.150030  |
| 107 | 6 | 0 | -4.801703 | 0.953409 | -0.174491 |
| 108 | 6 | 0 | -6.588800 | 0.414552 | 1.895776  |
| 109 | 6 | 0 | -6.171613 | 0.883879 | -0.430907 |
| 110 | 6 | 0 | -7.073095 | 0.618637 | 0.602495  |
| 111 | 1 | 0 | -0.819022 | 1.508925 | 3.107208  |
| 112 | 1 | 0 | 1.574887  | 4.017968 | 3.168260  |
| 113 | 1 | 0 | 0.752542  | 2.898320 | 4.283431  |
| 114 | 1 | 0 | 0.361078  | 4.637342 | 4.269324  |
| 115 | 1 | 0 | -2.612307 | 0.257162 | 2.355597  |
| 116 | 1 | 0 | -3.305808 | 3.124472 | -0.057056 |
| 117 | 1 | 0 | -3.094747 | 5.407396 | -0.756489 |
| 118 | 1 | 0 | -1.405269 | 5.970171 | -0.694595 |
| 119 | 1 | 0 | -2.533833 | 6.501297 | 0.535577  |
| 120 | 1 | 0 | -4.853132 | 0.337266 | 3.162790  |
| 121 | 1 | 0 | -4.112622 | 1.098611 | -0.998065 |
| 122 | 1 | 0 | -7.275912 | 0.197039 | 2.709360  |
| 123 | 1 | 0 | -6.533084 | 1.025075 | -1.446305 |
| 124 | 1 | 0 | -8.139125 | 0.561433 | 0.399716  |

---

Zero-point correction= 0.991582  
(Hartree/Particle)  
Thermal correction to Energy= 1.057329  
Thermal correction to Enthalpy= 1.058273  
Thermal correction to Gibbs Free Energy= 0.884839  
Sum of electronic and zero-point Energies= -3710.081102  
Sum of electronic and thermal Energies= -3710.015356  
Sum of electronic and thermal Enthalpies= -3710.014411  
Sum of electronic and thermal Free Energies= -3710.187845

IRC TS<sub>R</sub>

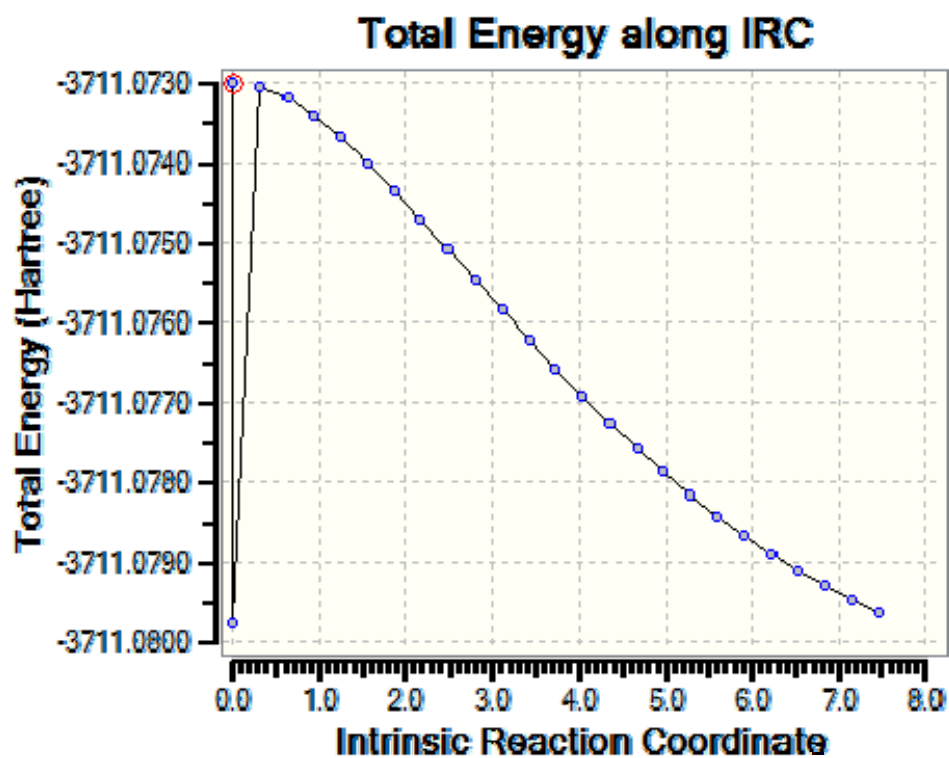

IRC TS<sub>S</sub>

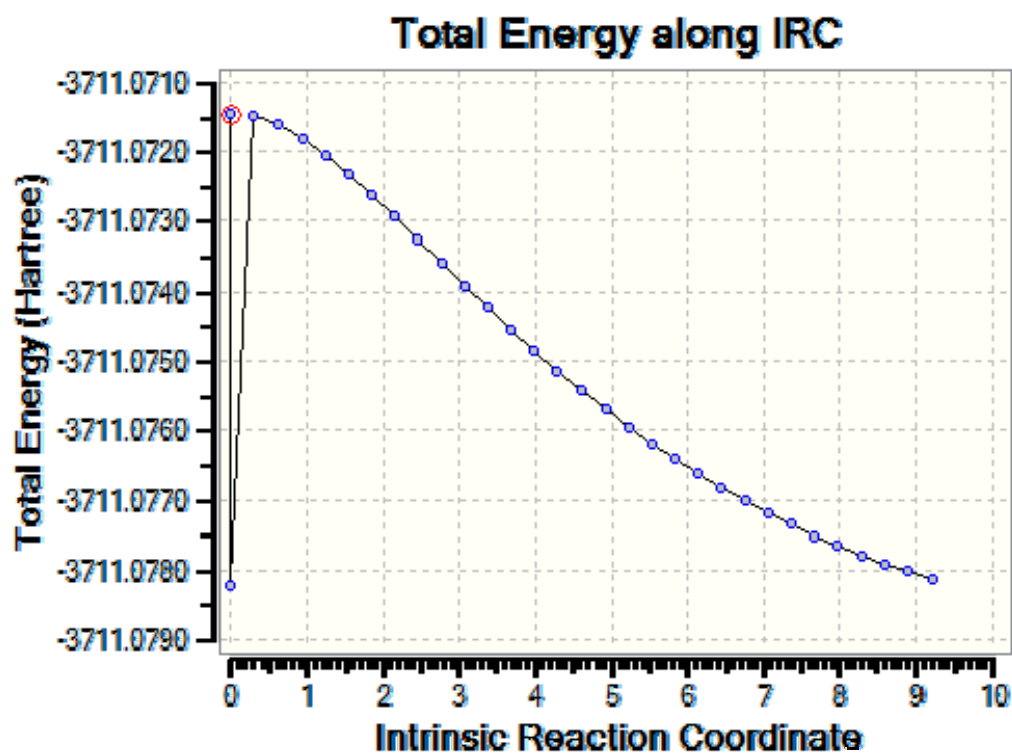

## Formation of the copper-phenoxide complex

The Cu complexes formed after the alkene insertion show a long Cu-C distance with the carbon atom involved in the reaction (**II<sub>S</sub>** and **II<sub>R</sub>**, Scheme 4, main manuscript). In fact, the structure is reminiscent of a ( $\pi$ -allyl)Cu complex. These complexes would become protonated in a subsequent step. We have also calculated the energy for isomer **III<sub>S</sub>** corresponding to the slipping of the borylated substrate to afford a copper-phenoxide complex (Figure S71). This process is highly exoergic, and for that reason, we propose that protonation most likely takes place at the Cu-O bond. We cannot rule out direct reaction of copper phenoxide **III<sub>S</sub>** with B<sub>2</sub>pin<sub>2</sub> to generate a borylated phenol and a copper(I)-boryl complex that would start over the catalytic cycle.

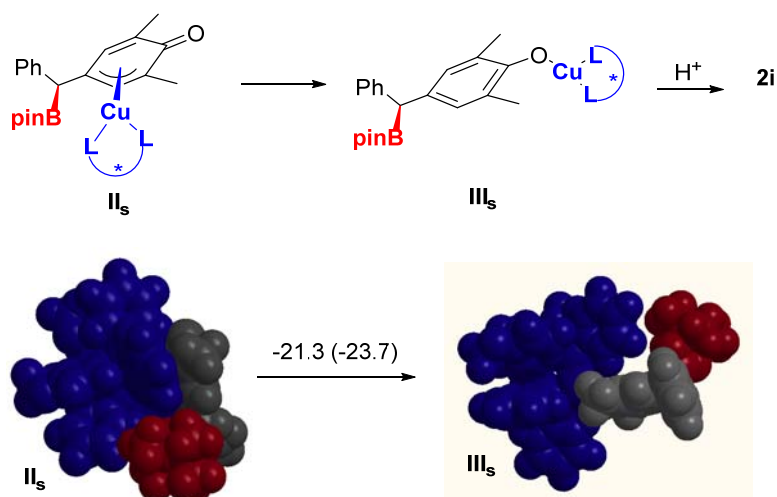

**Figure S71.** Calculated energy difference and equilibrium geometries for the formation of the copper-phenoxide complex at B3LYP/STO-3G (C,H,B,O,P) LANL2DZ (Cu) level.  $\Delta(E+ZPE)$  and  $\Delta G$  values (in brackets) in kcal mol<sup>-1</sup>.



## Stereochemical Model

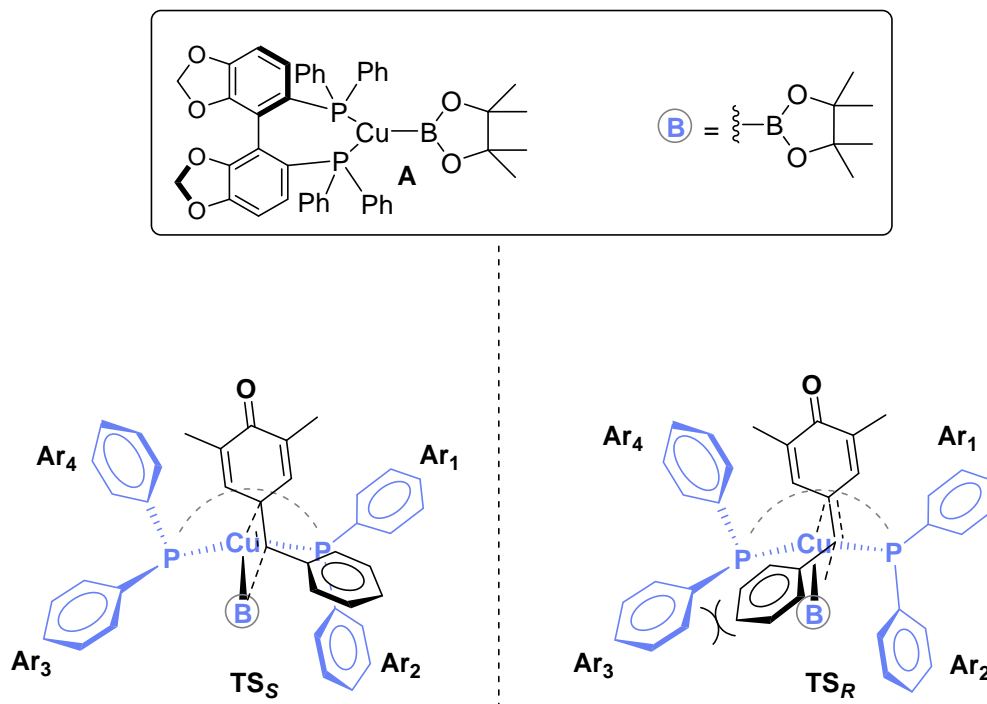

The following rationale, based on DFT-optimized geometries, was used to explain the enantioselectivity of the reaction. Gathering the substrate for either face to the (*R*)-Segphos-Cu-boryl complex gives rise to **TS<sub>R</sub>** (*Re*-face approach) and **TS<sub>S</sub>** (*Si*-face approach). To simplify the drawings we have only shown the part of the copper-boryl complex **A** that interacts directly with the *p*-quinone methide. For clarification, in **TS<sub>S</sub>** and **TS<sub>R</sub>** the *p*-quinone methide is approaching the catalyst complex from above the plane.

**TS<sub>S</sub>** is free from steric repulsion between the phenyl group of the exocyclic alkene and **Ar<sub>1</sub>**-**Ar<sub>2</sub>** of the chiral ligand. However, **TS<sub>R</sub>** is destabilized by steric repulsion between the phenyl group and **Ar<sub>3</sub>**. This steric repulsion would also explain why both *E* and *Z* isomers of *p*-quinone methides **1o-1p** react through the *Si*-face, affording the same major enantiomer (Scheme 2, main manuscript).
